# Supplementary material for: Cytotoxic Impact of Fluorinated Ligands in Equatorial Position of Trans-Configured Diam(m)inetetracarboxylatoplatinum(IV) Complexes
Source: MDPI journal article supplement (doi:10.3390/inorganics11100411), 2023-10-17
Supplement: s1 [file s1]

## Supporting Information

# **Cytotoxic impact of fluorinated ligands in equatorial position of *trans*-configured diam(m)inetetracarboxylato-platinum(IV) complexes**

Yvonne Lerchbammer-Kreith<sup>1</sup>, Michaela Hejl<sup>1</sup>, Dominik Wenisch<sup>1</sup>, Michael A. Jakupiec<sup>1,2</sup>, Mathea S. Galanski<sup>1,\*</sup>, Bernhard K. Keppler<sup>1,2\*</sup>

<sup>1</sup>University of Vienna, Faculty of Chemistry, Institute of Inorganic Chemistry, Waehringer Strasse 42, 1090 Vienna, Austria

<sup>2</sup>Research Cluster “Translational Cancer Therapy Research”, University of Vienna, Waehringer Strasse 42, 1090 Vienna, Austria

\*Corresponding authors: E-mail addresses: mathea.galanski@univie.ac.at; bernhard.keppler@univie.ac.at

## Contents

|                                                |     |
|------------------------------------------------|-----|
| 1. NMR spectra of platinum(II) complexes ..... | 3   |
| 2. NMR spectra of platinum(IV) complexes ..... | 9   |
| 3. X-Ray Diffraction Analysis .....            | 69  |
| 4. Concentration-effect curves .....           | 110 |
| 5. Flow-cytometric analysis.....               | 116 |
| 6. References .....                            | 122 |

## 1. NMR spectra of platinum(II) complexes

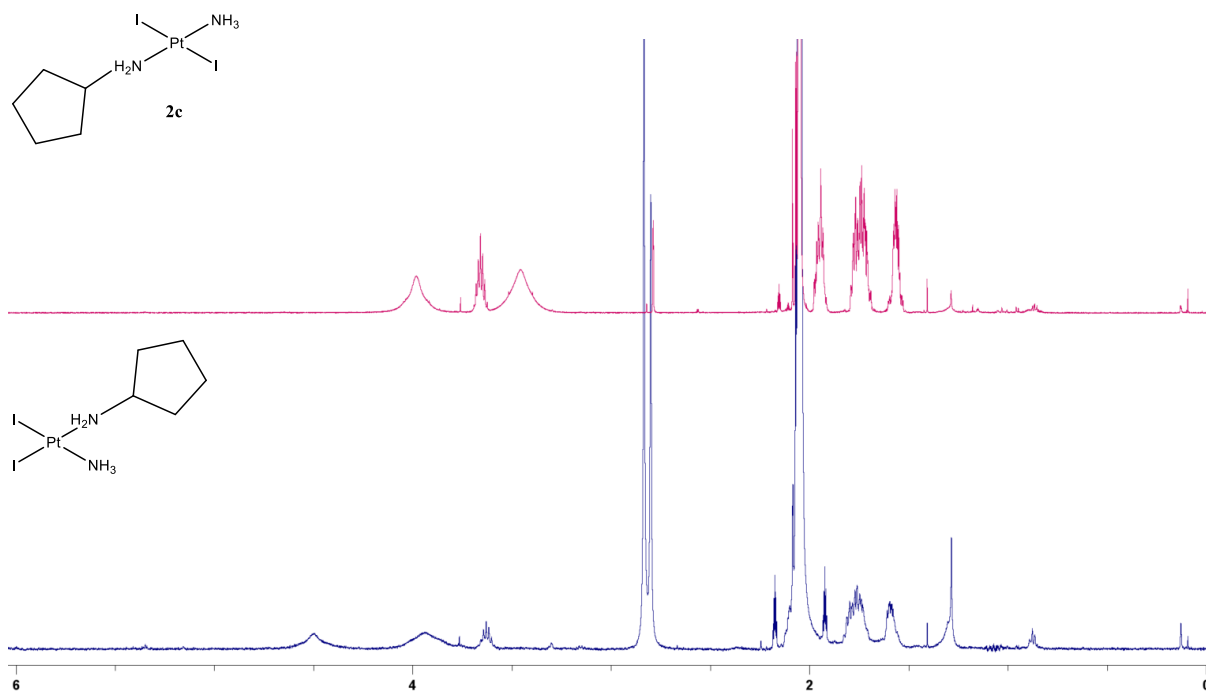

**Figure S1.** <sup>1</sup>H NMR spectra of *cis*-(SP-4-2)-amminecyclopentylaminediiodoplatinum(II) (bottom) and *trans*-(SP-4-1)-amminecyclopentylaminediiodoplatinum(II) **2c** (top) in d<sub>6</sub>-acetone.

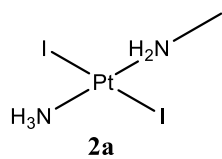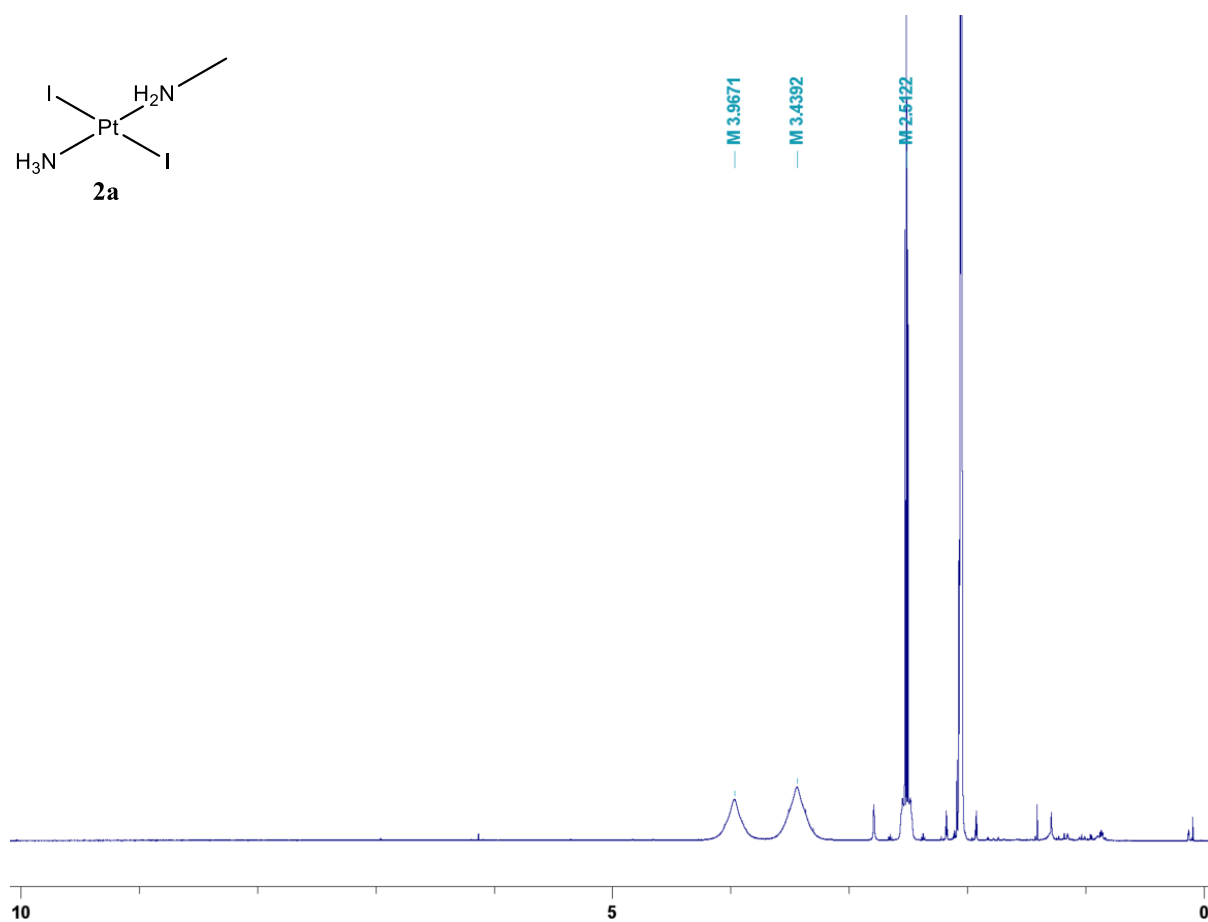

**Figure S2.**  $^1\text{H}$  NMR spectrum of **2a** in  $\text{d}_6$ -acetone.

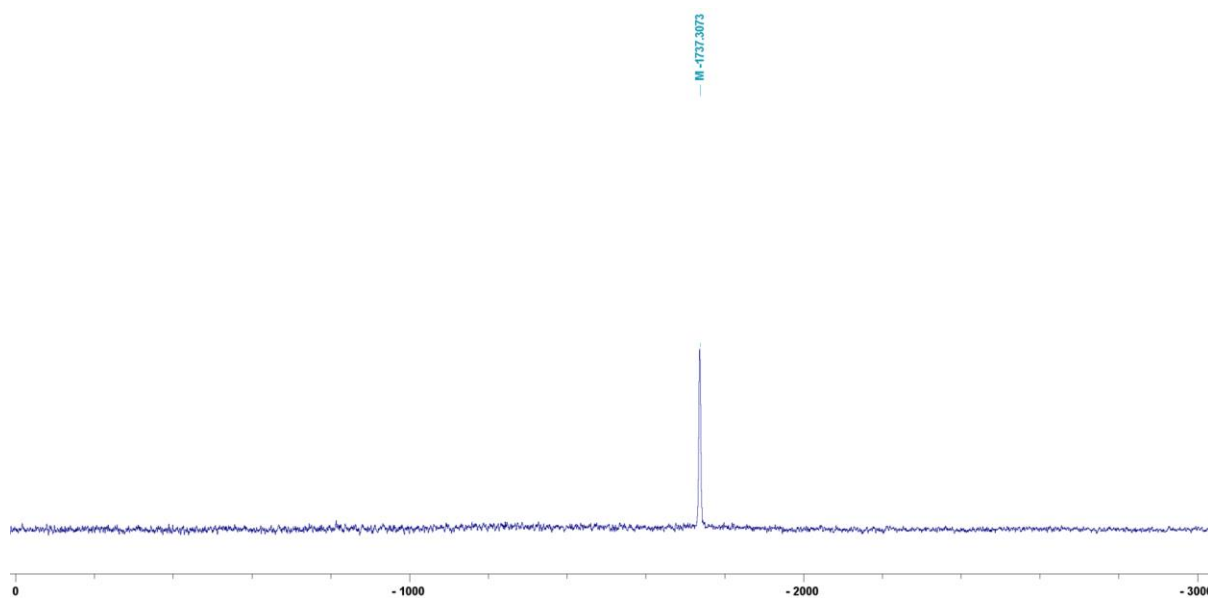

**Figure S3.**  $^{195}\text{Pt}$  NMR spectrum of **2a** in  $\text{d}_6$ -acetone.

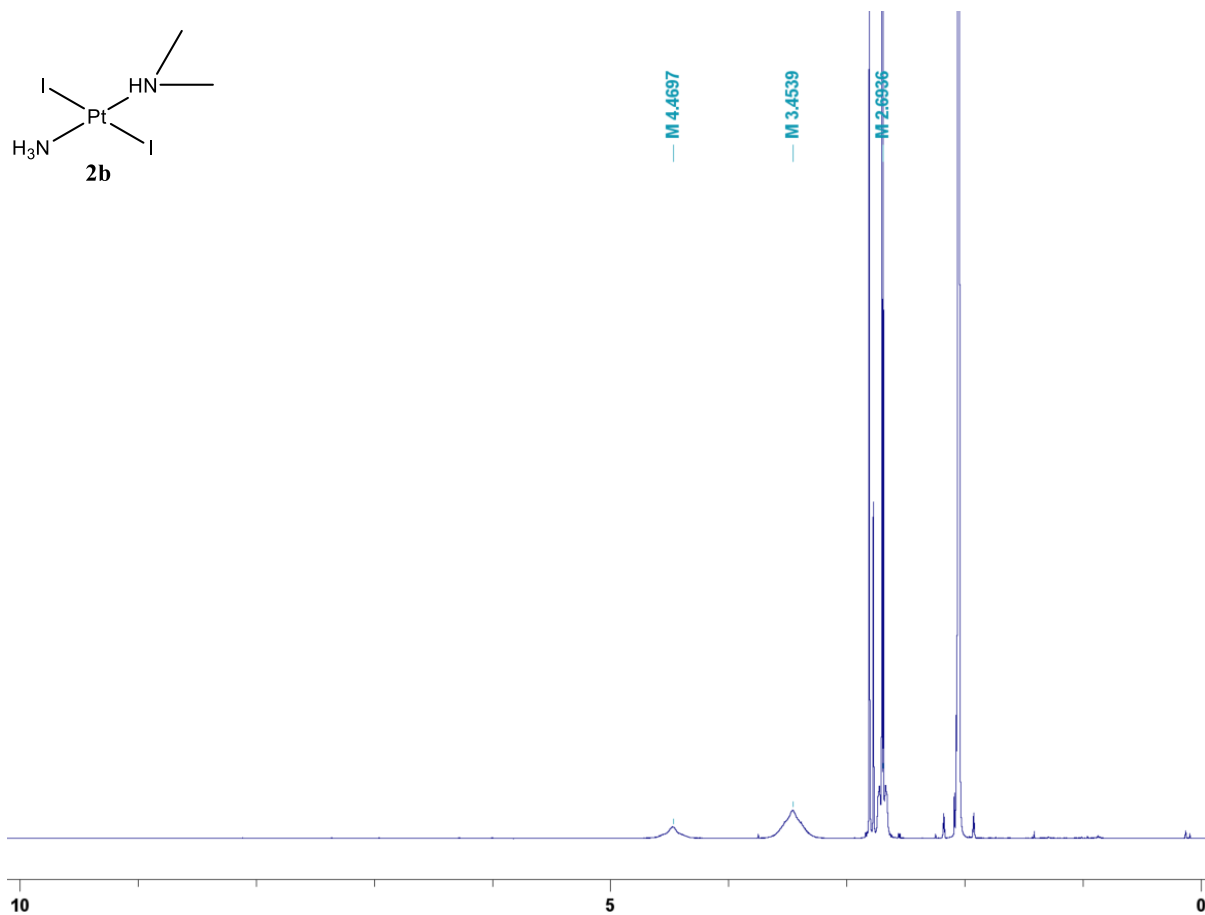

**Figure S4.** <sup>1</sup>H NMR spectrum of **2b** in d<sub>6</sub>-acetone.

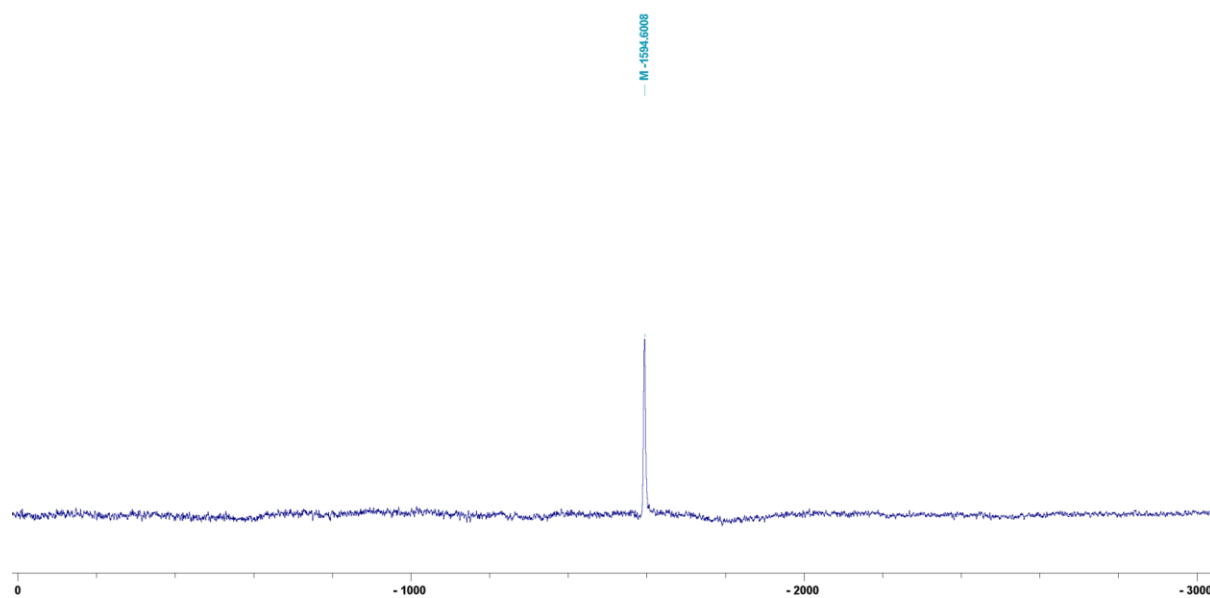

**Figure S5.** <sup>195</sup>Pt NMR spectrum of **2b** in d<sub>6</sub>-acetone.

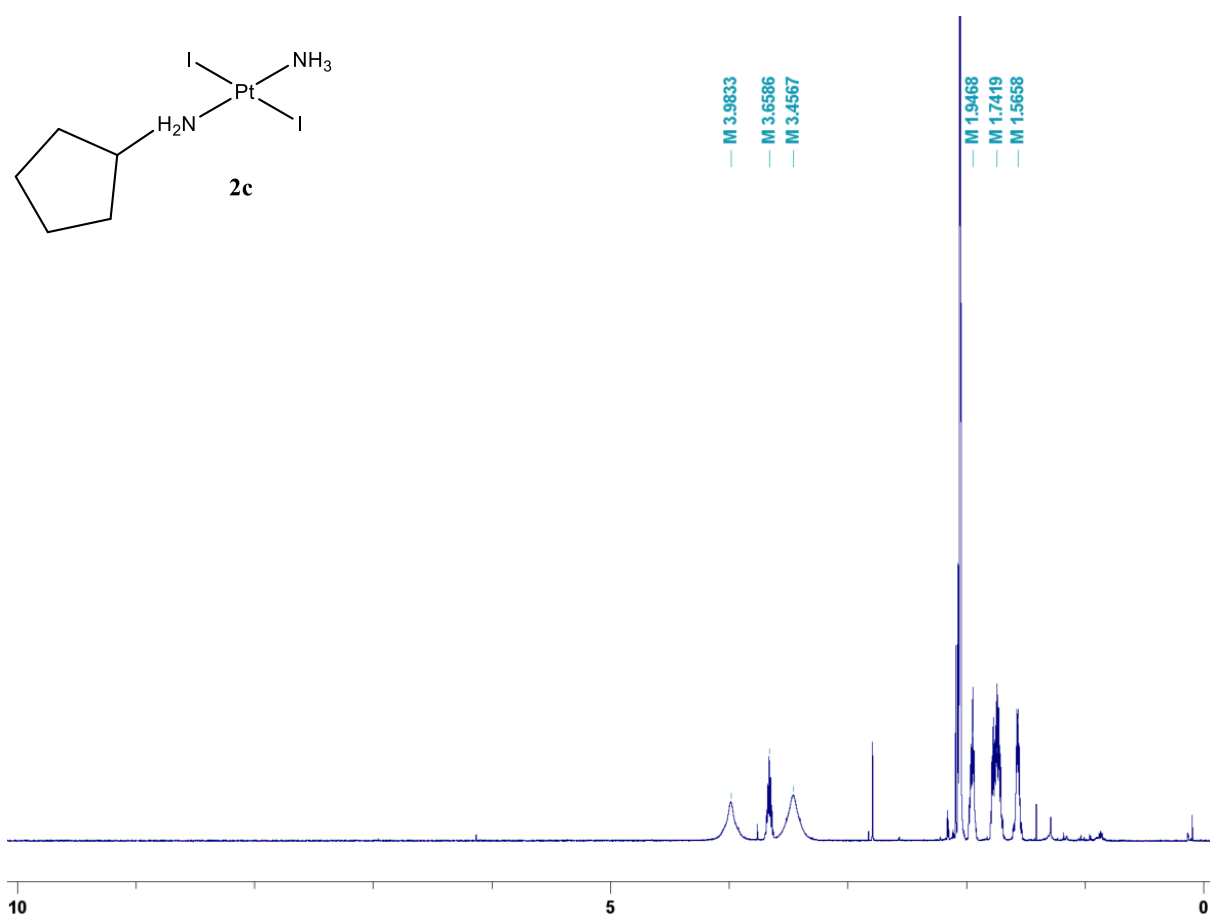

**Figure S6.**  $^1\text{H}$  NMR spectrum of **2c** in  $\text{d}_6$ -acetone.

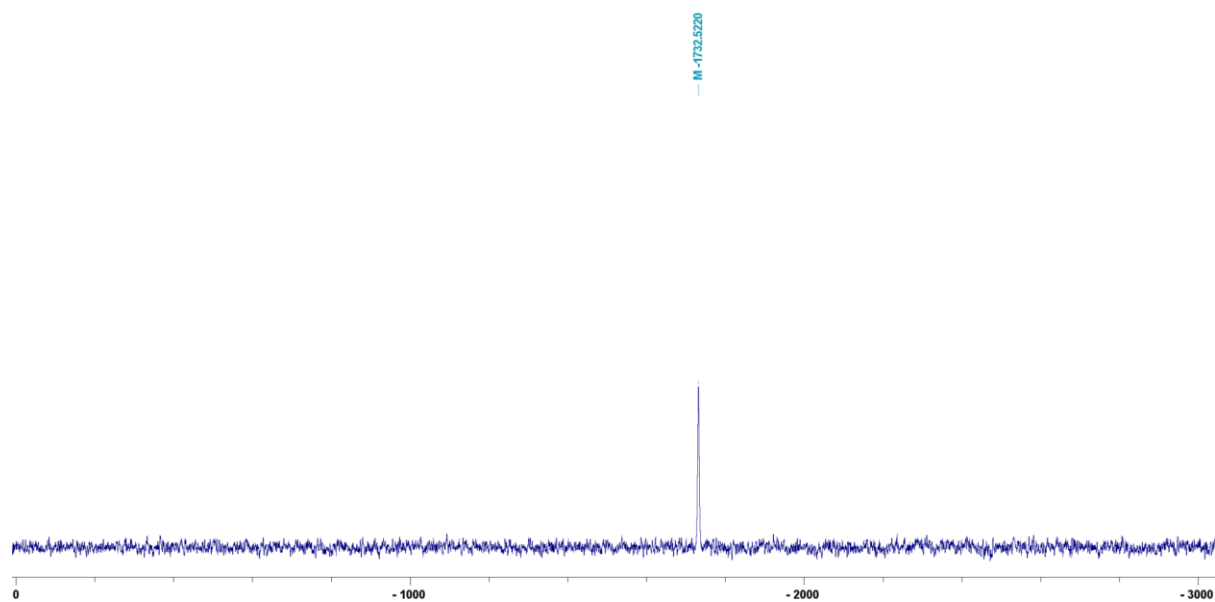

**Figure S7.**  $^{195}\text{Pt}$  NMR spectrum of **2c** in  $\text{d}_6$ -acetone.

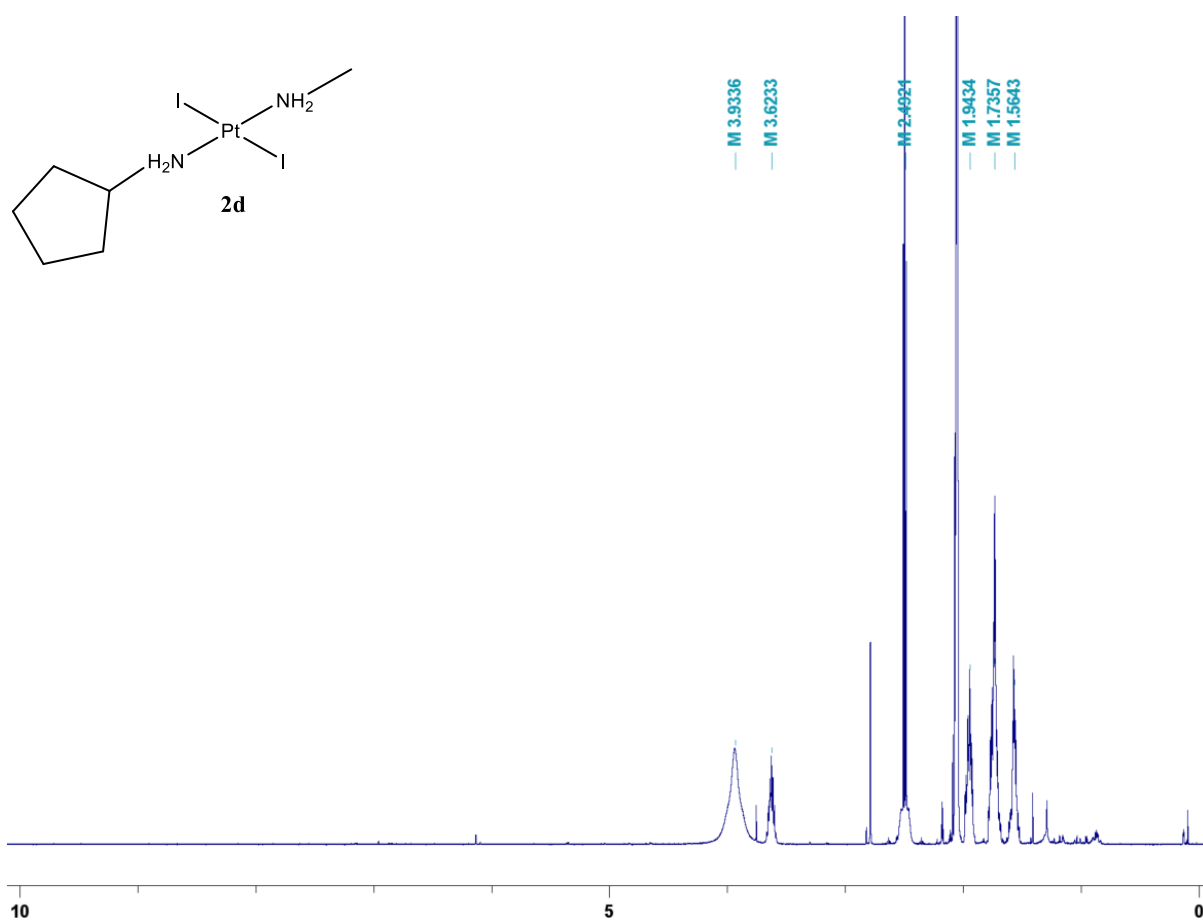

**Figure S8.** <sup>1</sup>H NMR spectrum of **2d** in d<sub>6</sub>-acetone.

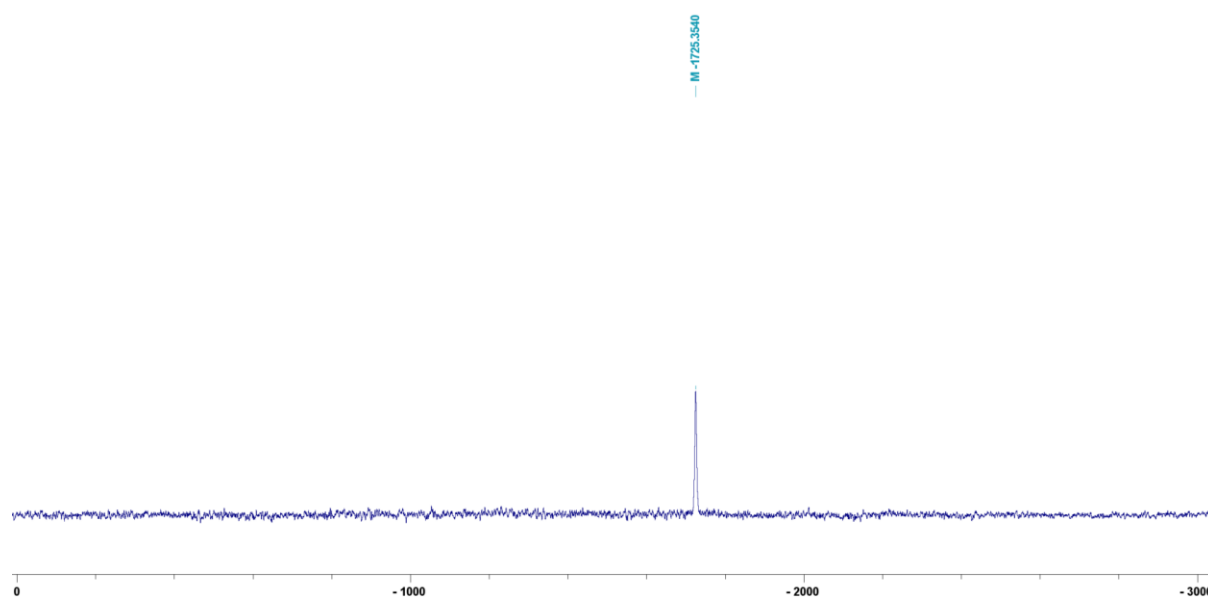

**Figure S9.** <sup>195</sup>Pt NMR spectrum of **2d** in d<sub>6</sub>-acetone.

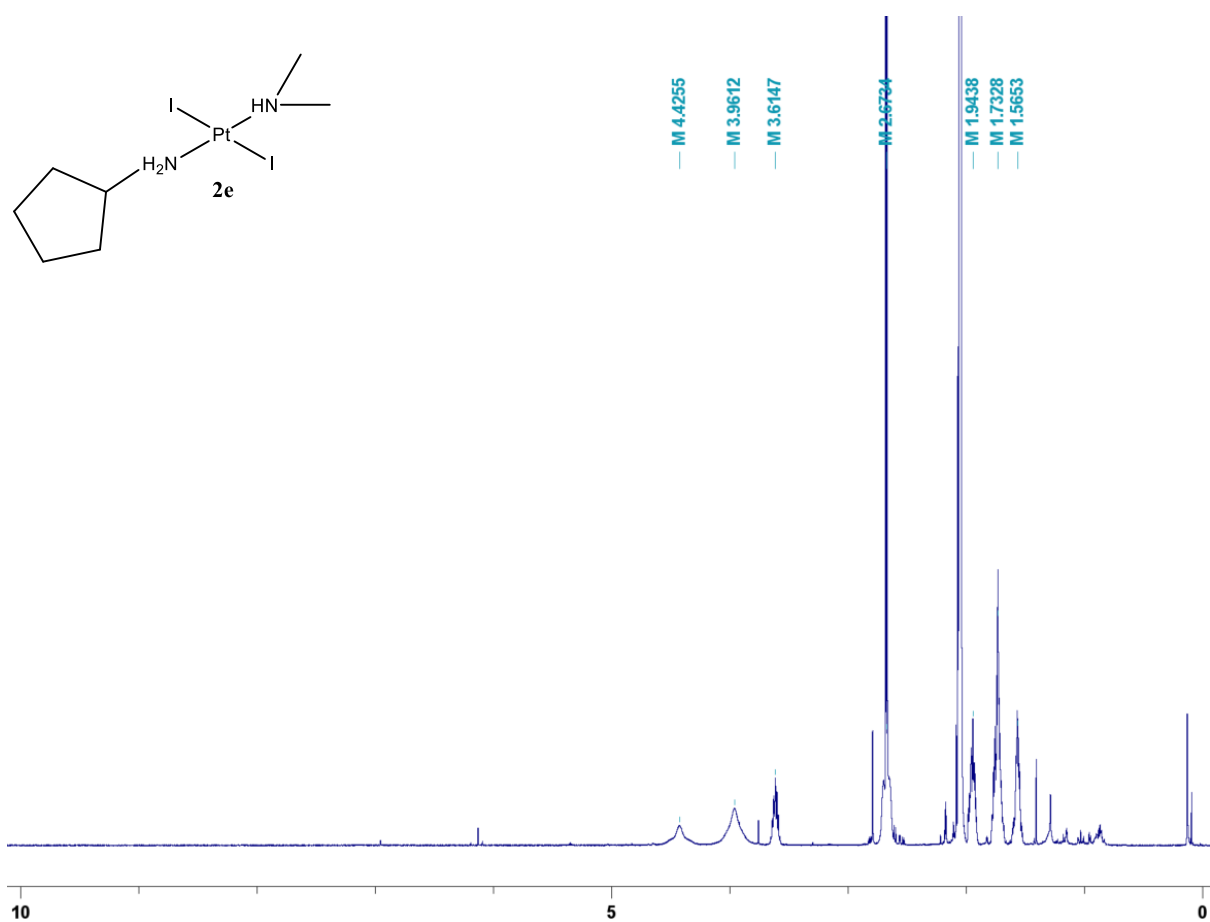

**Figure S10.** <sup>1</sup>H NMR spectrum of **2e** in d<sub>6</sub>-acetone.

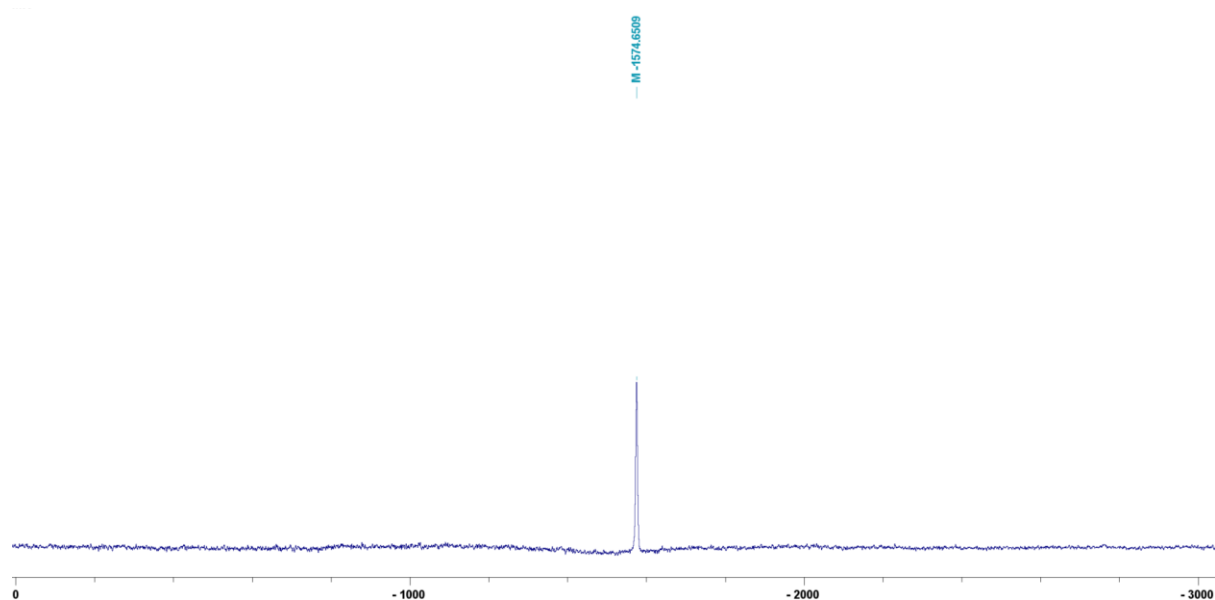

**Figure S11.** <sup>195</sup>Pt NMR spectrum of **2e** in d<sub>6</sub>-acetone.



## 2. NMR spectra of platinum(IV) complexes

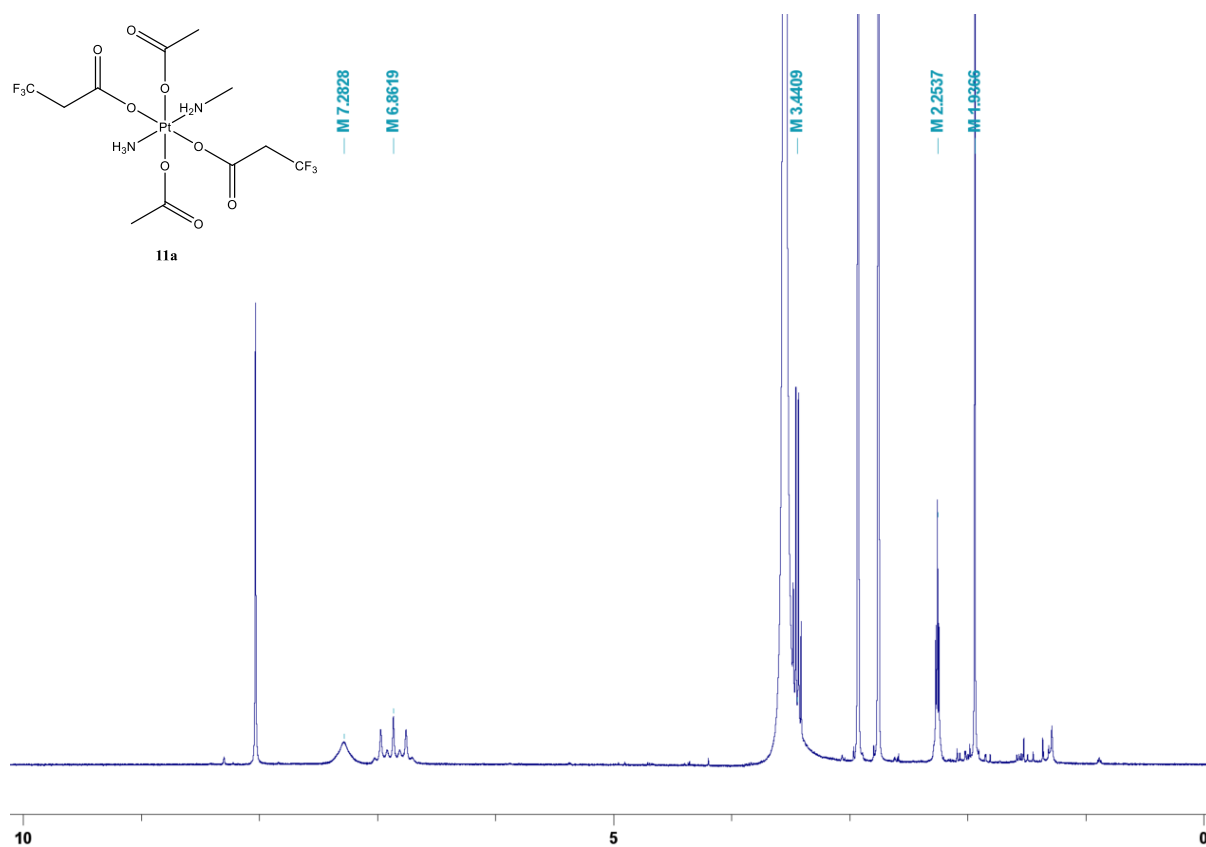

**Figure S12.** <sup>1</sup>H NMR spectrum of **11a** in d<sub>7</sub>-DMF.

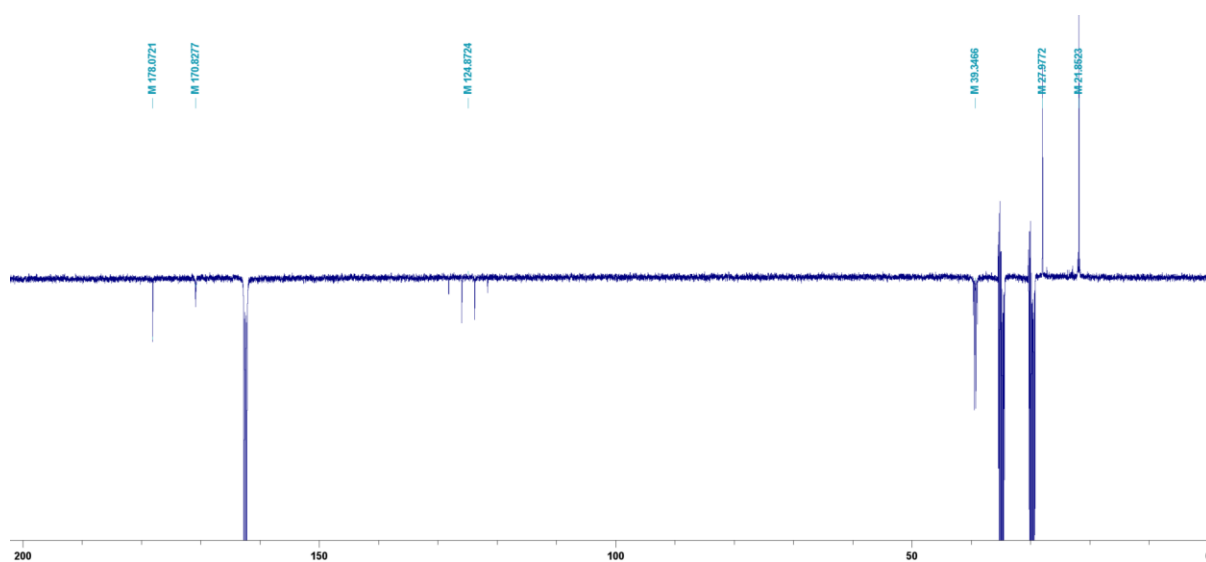

**Figure S13.** <sup>13</sup>C NMR spectrum of **11a** in d<sub>7</sub>-DMF.

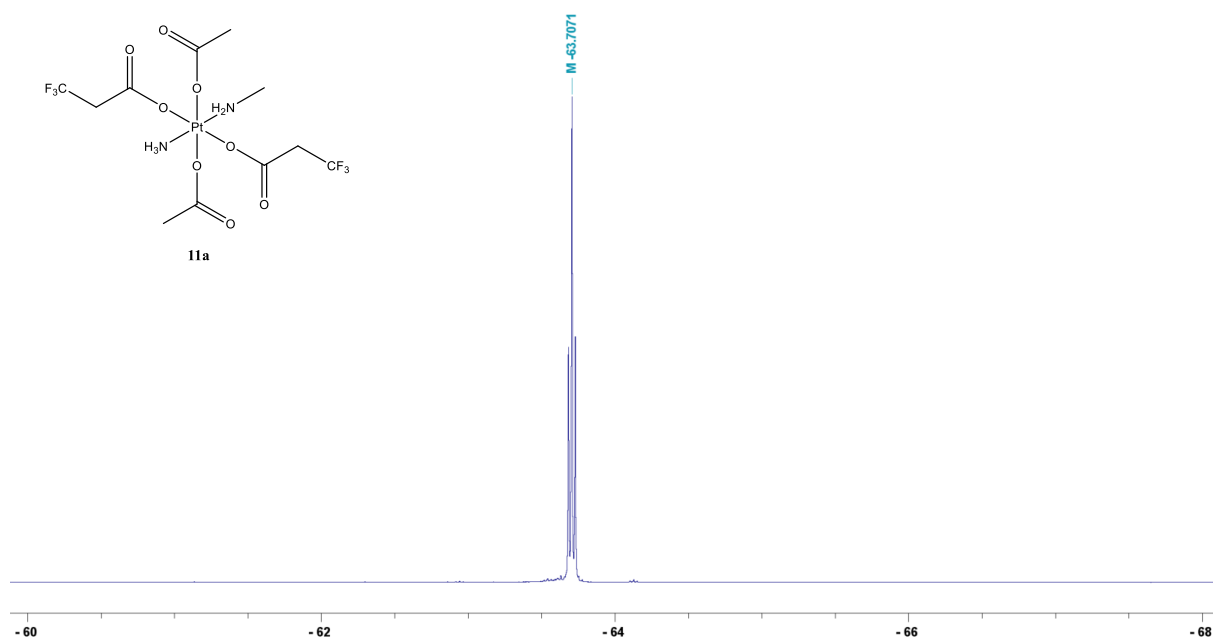

**Figure S14.** <sup>19</sup>F NMR spectrum of **11a** in d<sub>7</sub>-DMF.

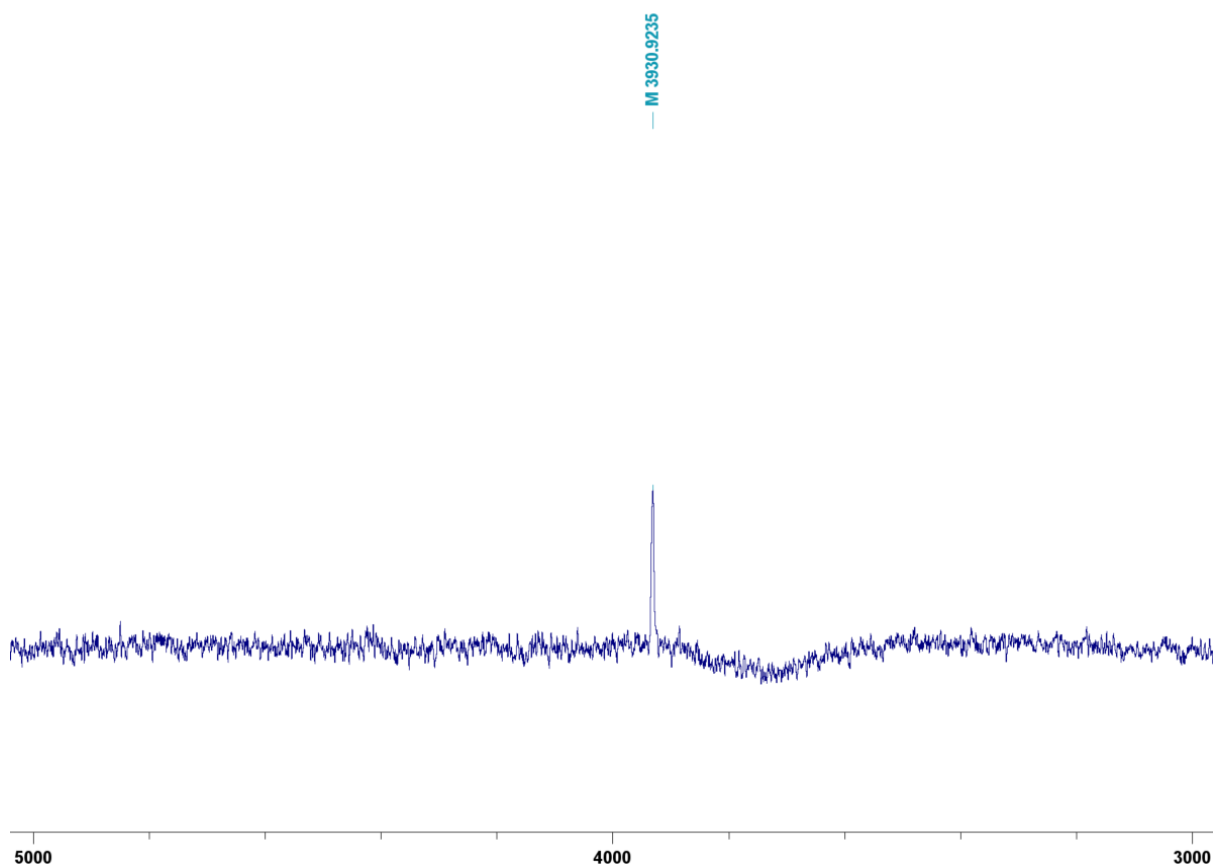

**Figure S15.** <sup>195</sup>Pt NMR spectrum of **11a** in d<sub>7</sub>-DMF.

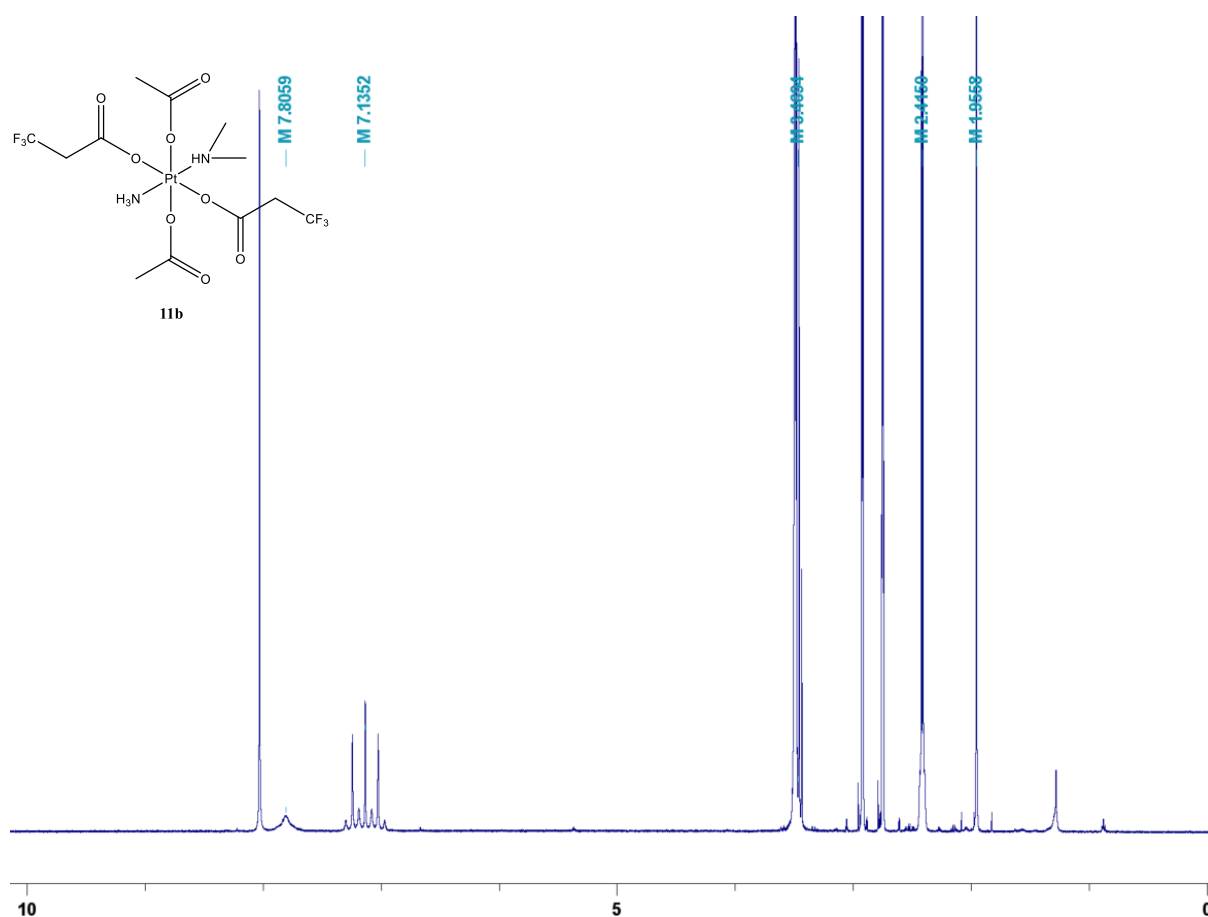

**Figure S16.** <sup>1</sup>H NMR spectrum of **11b** in d<sub>7</sub>-DMF.

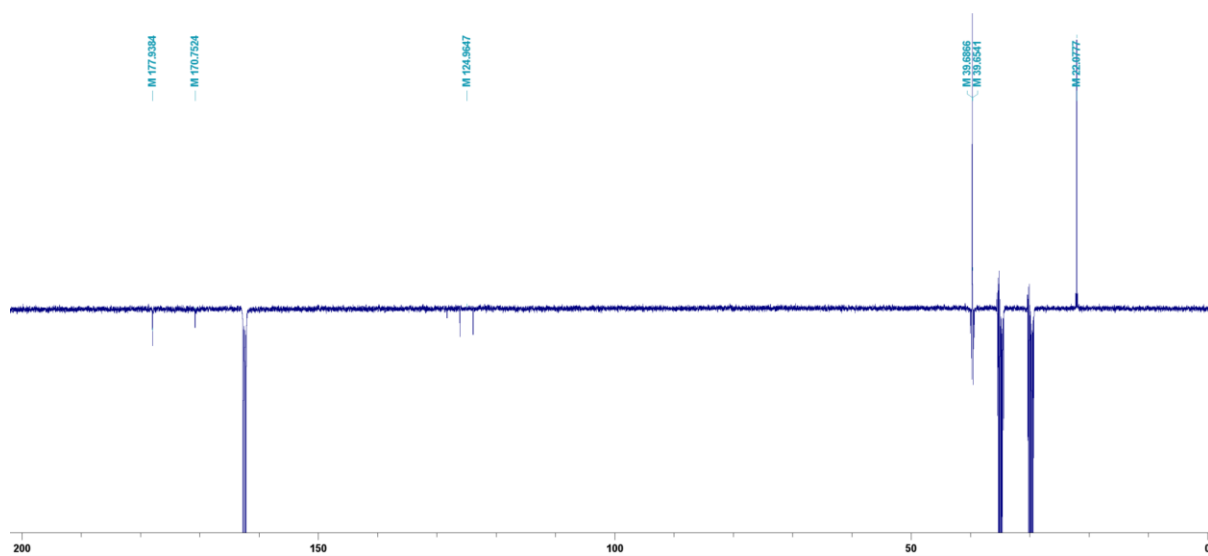

**Figure S17.** <sup>13</sup>C NMR spectrum of **11b** in d<sub>7</sub>-DMF.

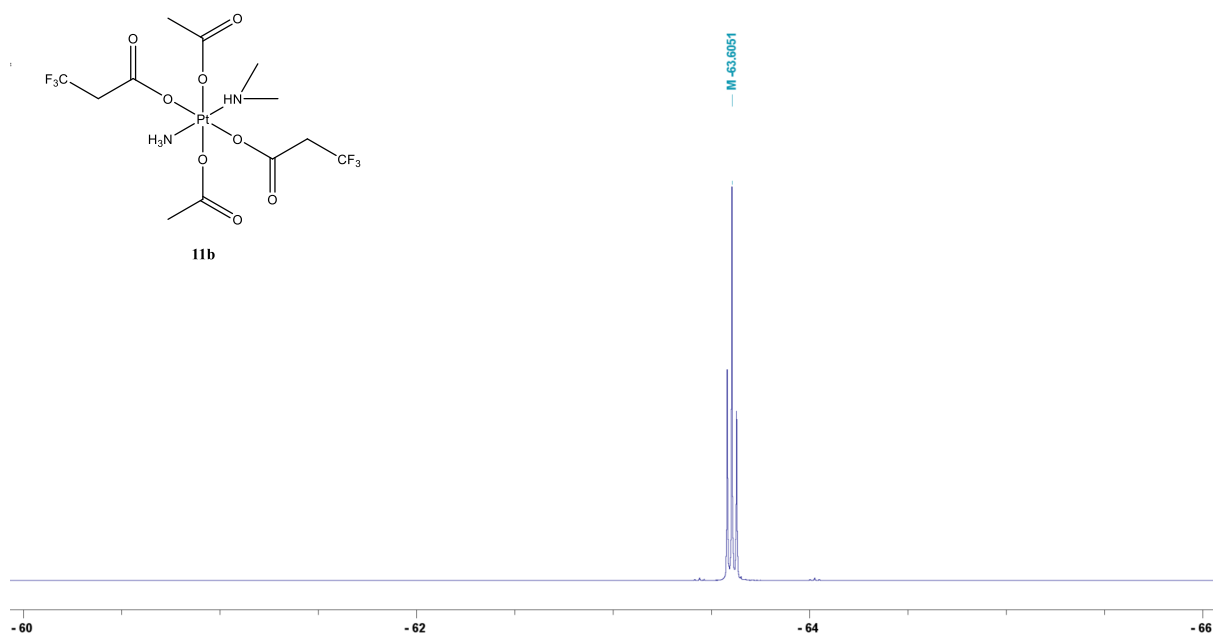

**Figure S18.**  $^{19}\text{F}$  NMR spectrum of **11b** in  $\text{d}_7$ -DMF.

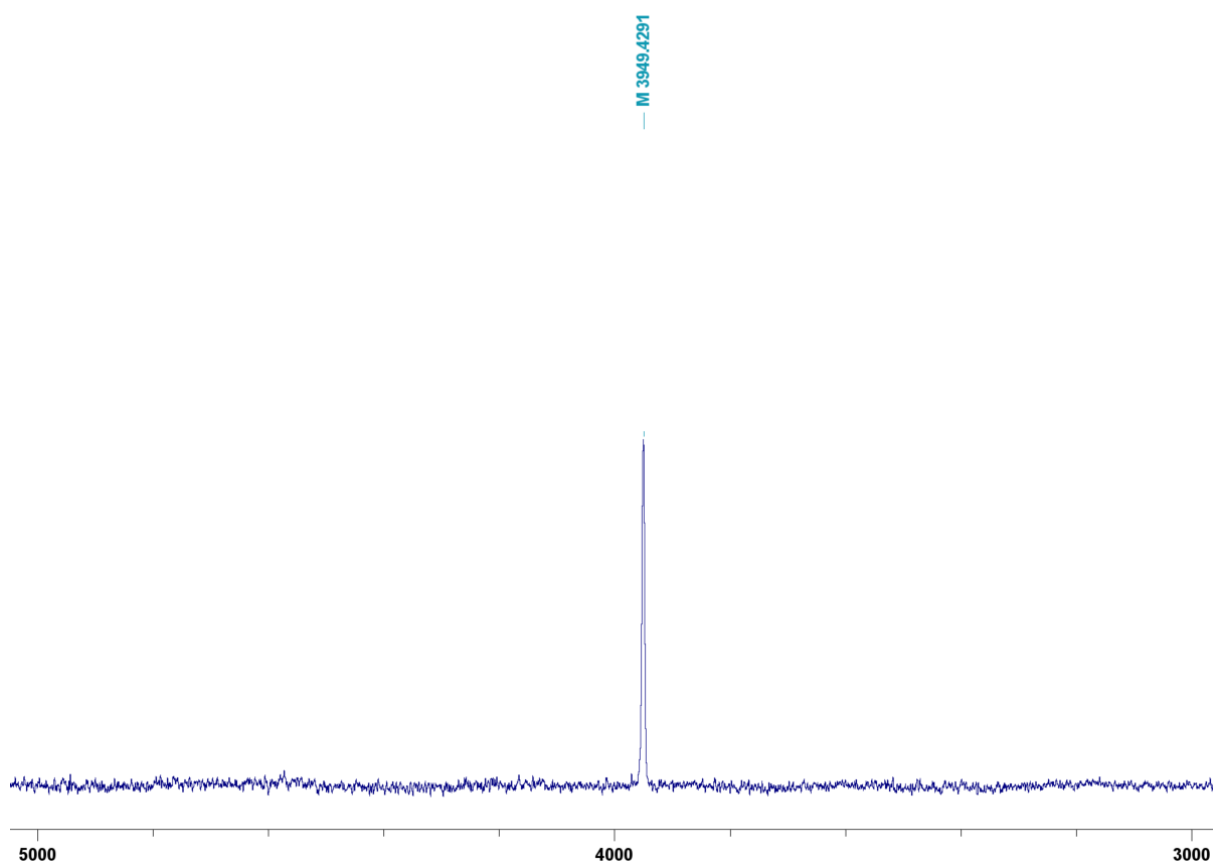

**Figure S19.**  $^{195}\text{Pt}$  NMR spectrum of **11b** in  $\text{d}_7$ -DMF.

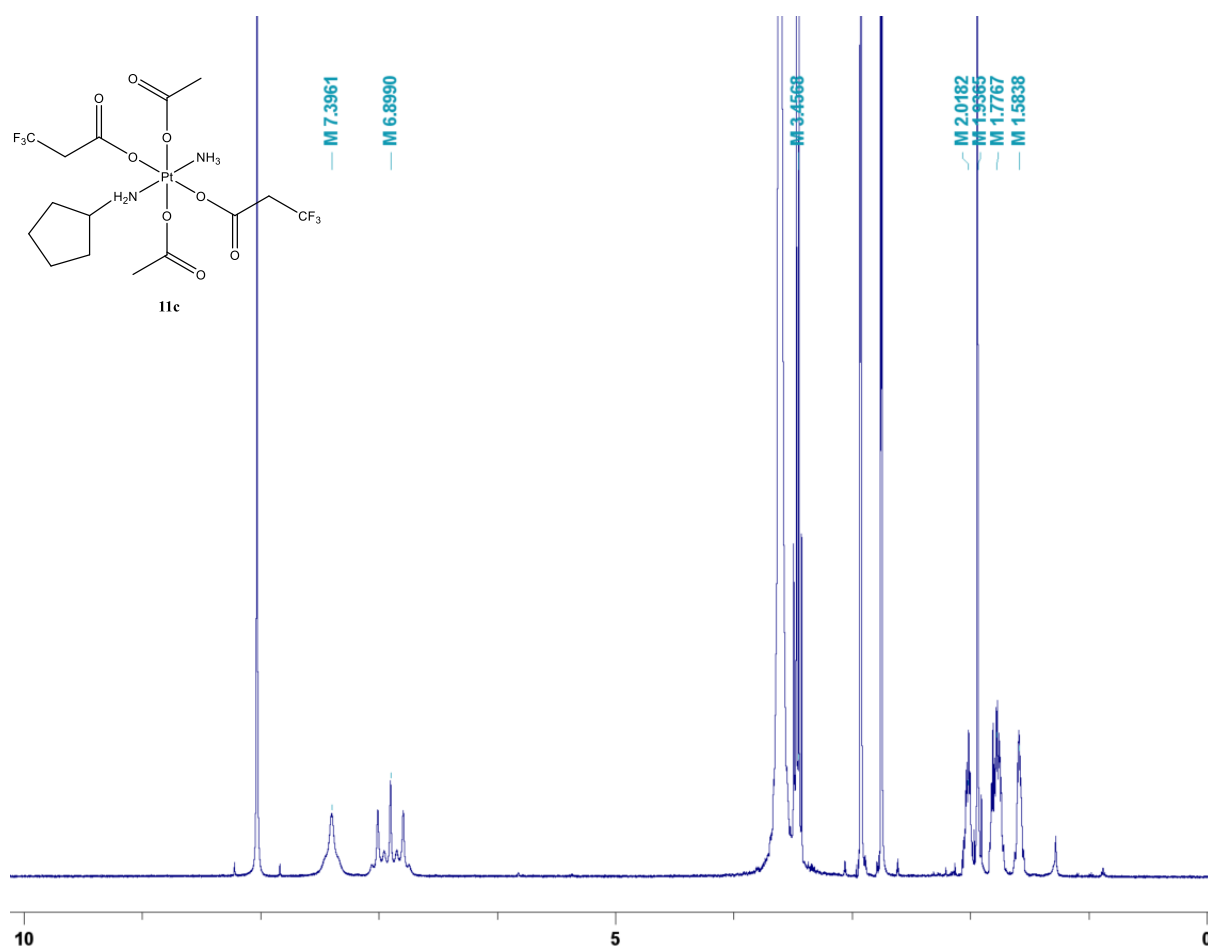

**Figure S20.** <sup>1</sup>H NMR spectrum of **11c** in d<sub>7</sub>-DMF.

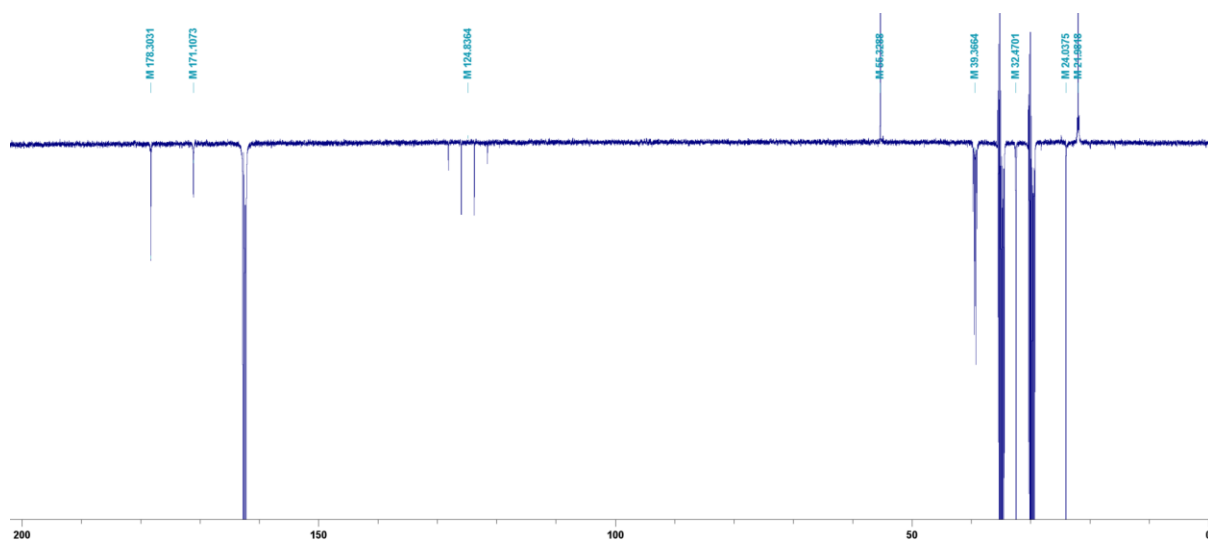

**Figure S21.** <sup>13</sup>C NMR spectrum of **11c** in d<sub>7</sub>-DMF.

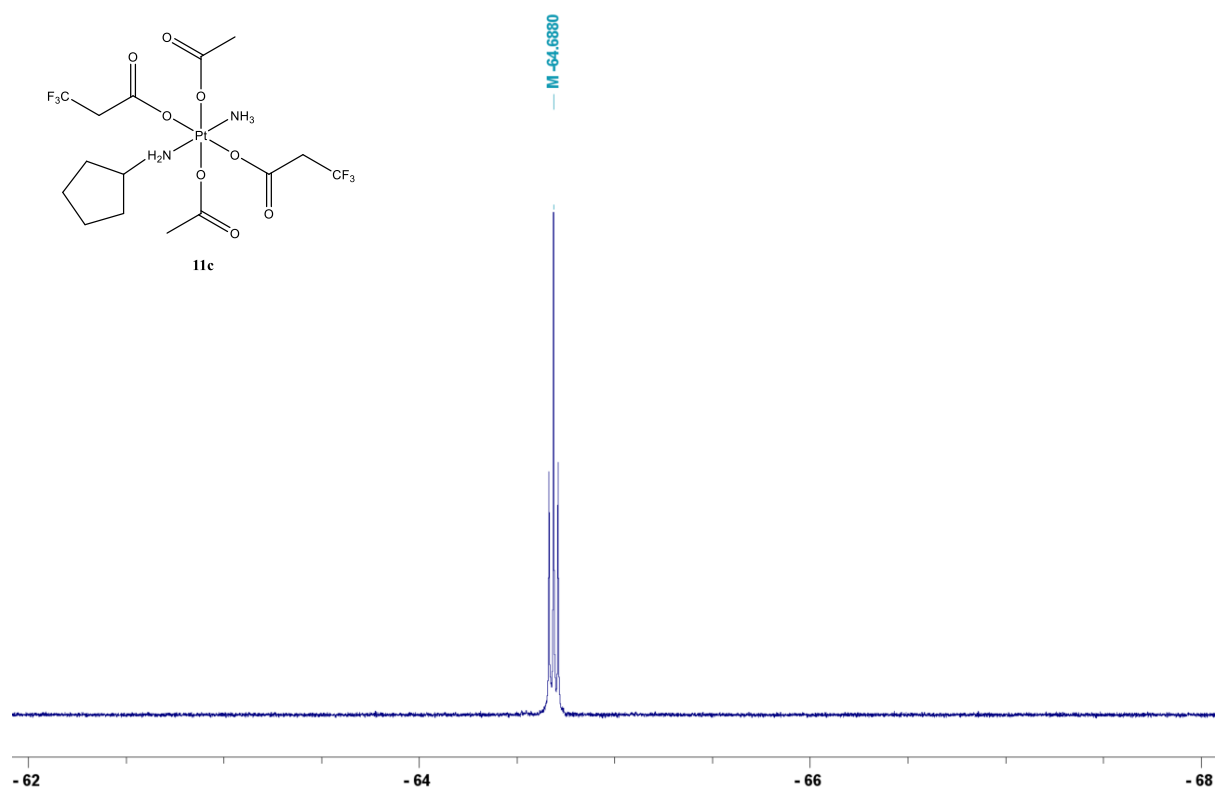

**Figure S22.**  $^{19}\text{F}$  NMR spectrum of **11c** in  $\text{d}_7$ -DMF.

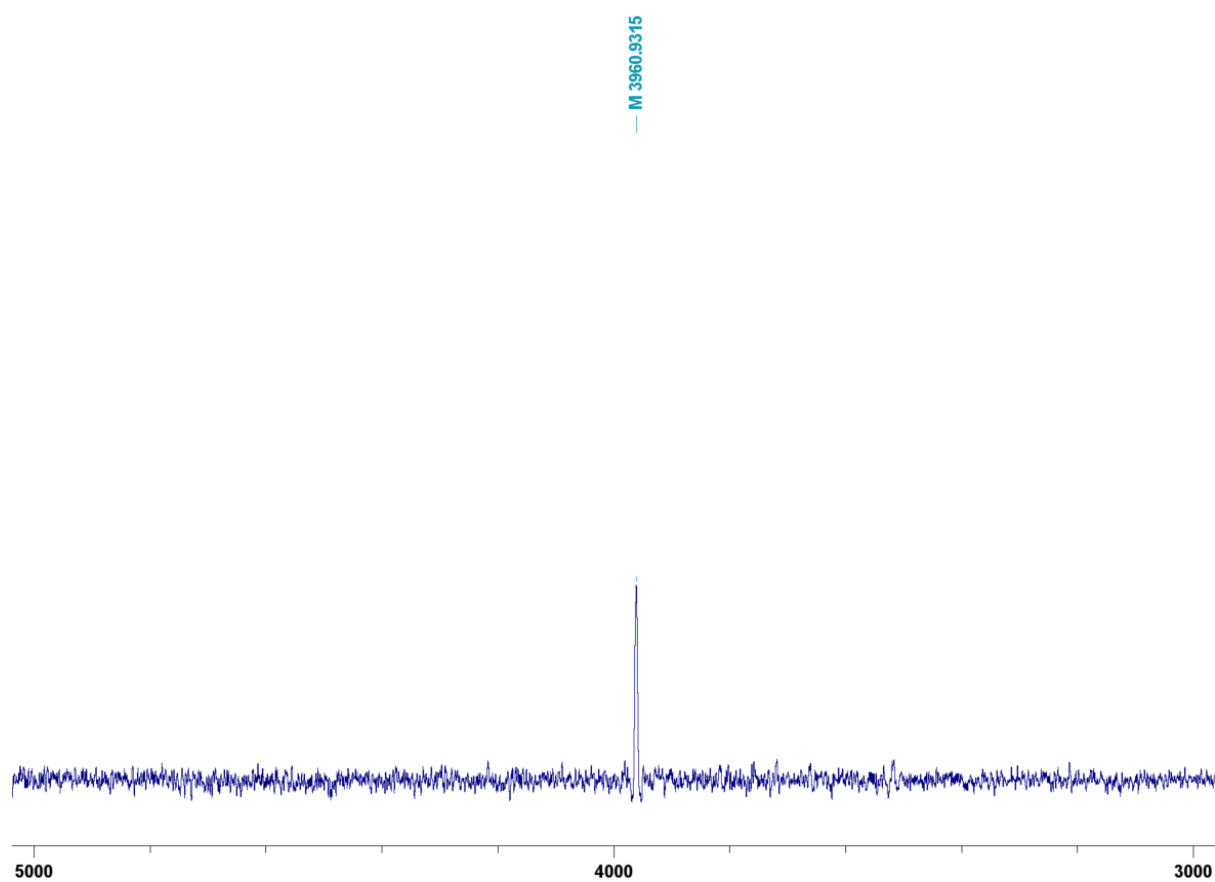

**Figure S23.**  $^{195}\text{Pt}$  NMR spectrum of **11c** in  $\text{d}_7$ -DMF.

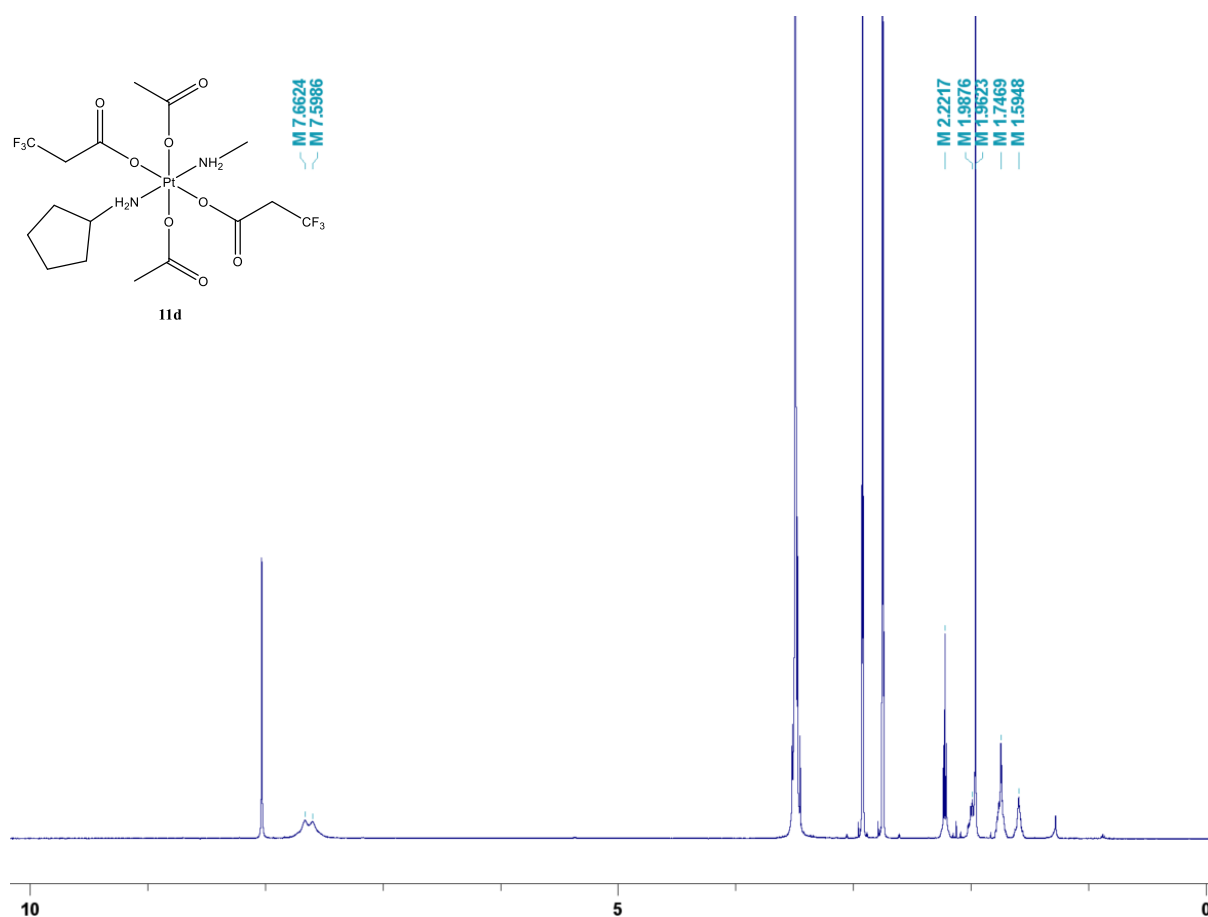

Figure S24. <sup>1</sup>H NMR spectrum of **11d** in d<sub>7</sub>-DMF.

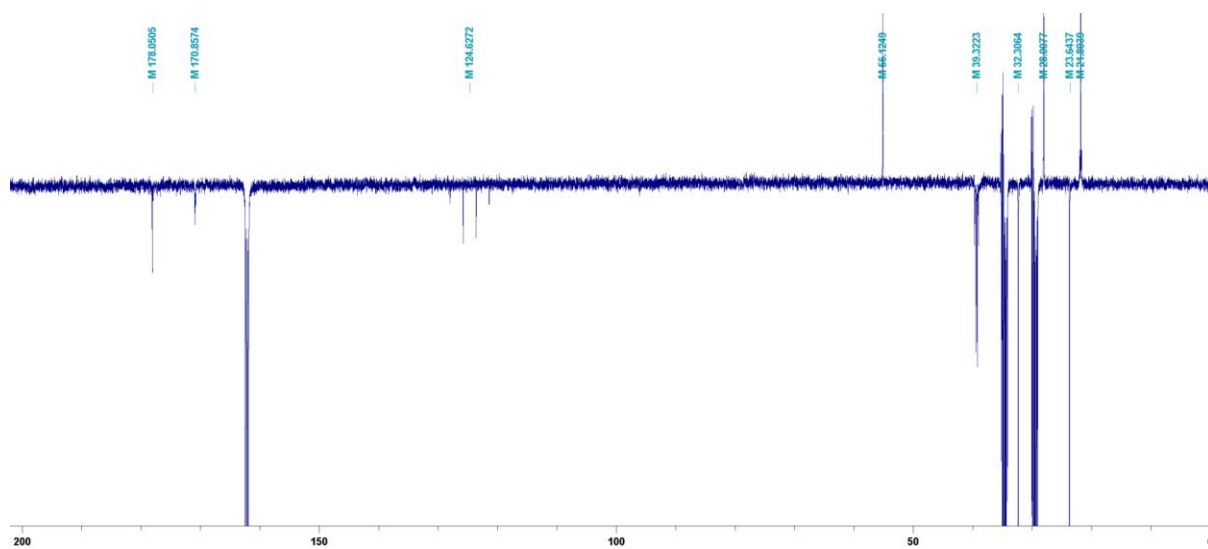

Figure S25. <sup>13</sup>C NMR spectrum of **11d** in d<sub>7</sub>-DMF.

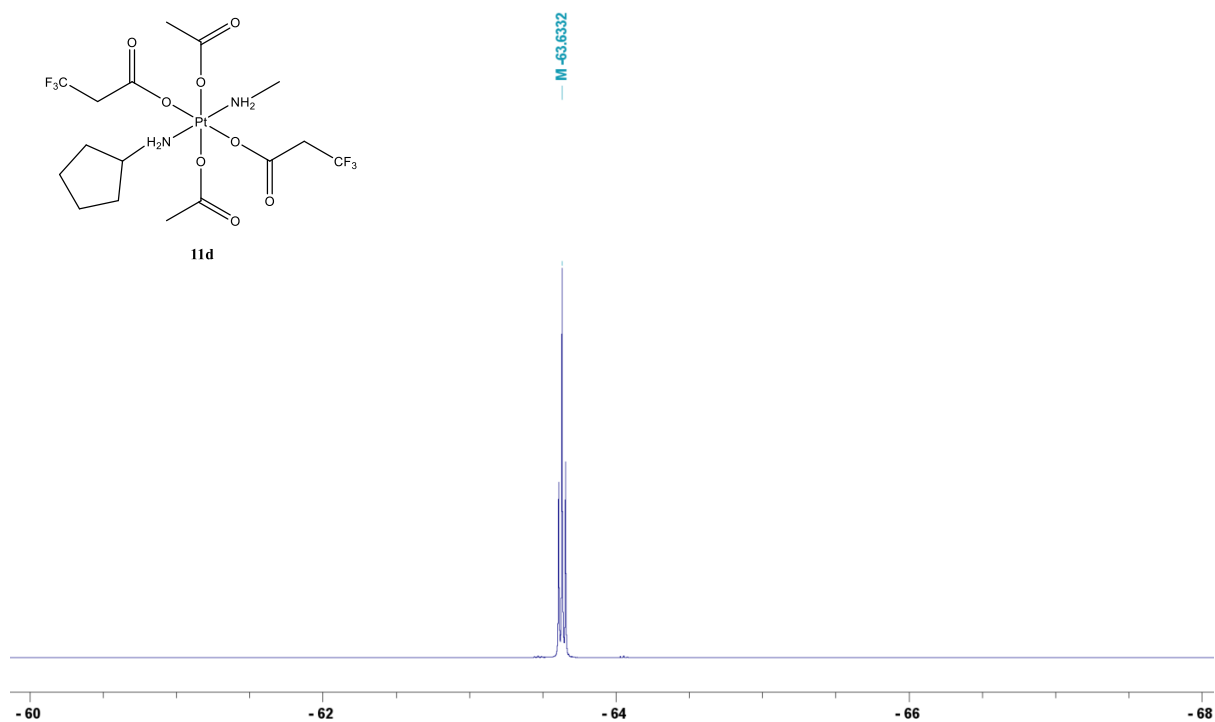

**Figure S26.**  $^{19}\text{F}$  NMR spectrum of **11d** in  $\text{d}_7\text{-DMF}$ .

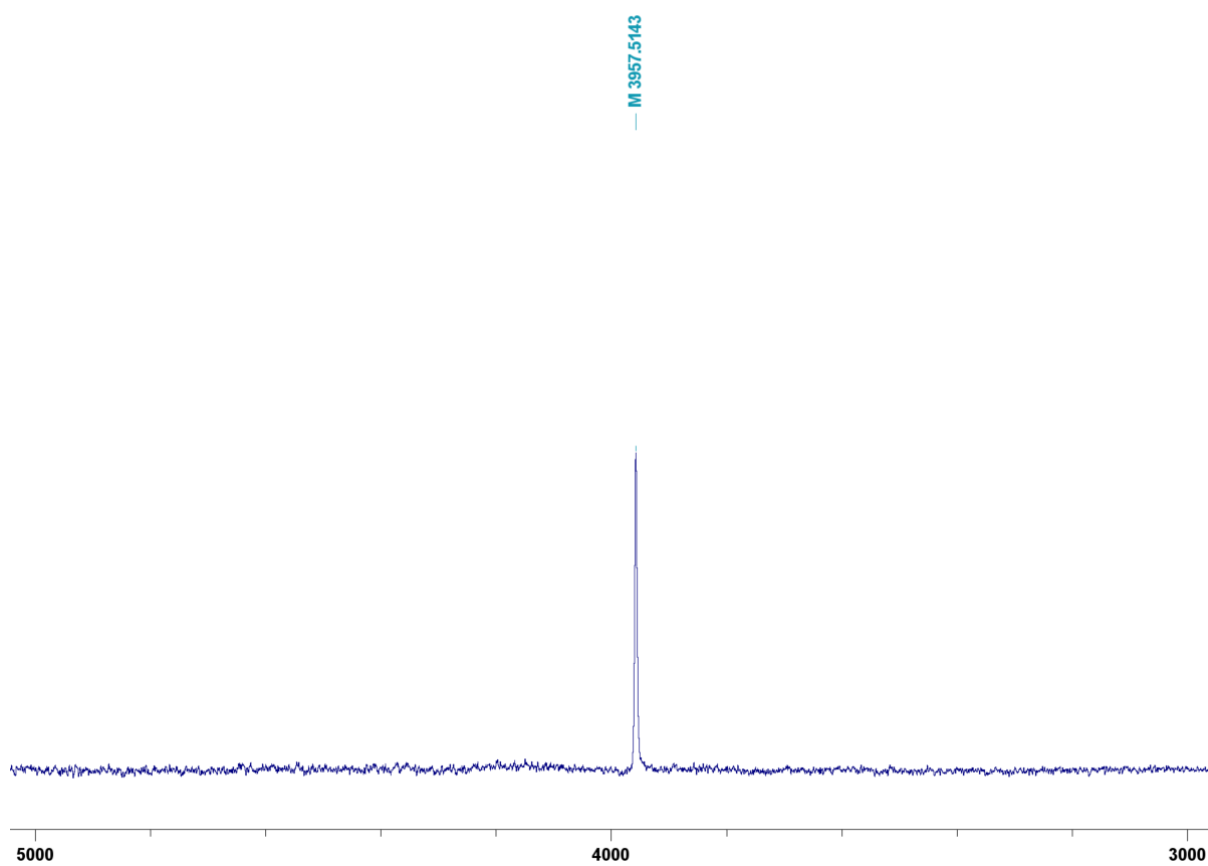

**Figure S27.**  $^{195}\text{Pt}$  NMR spectrum of **11d** in  $\text{d}_7\text{-DMF}$ .



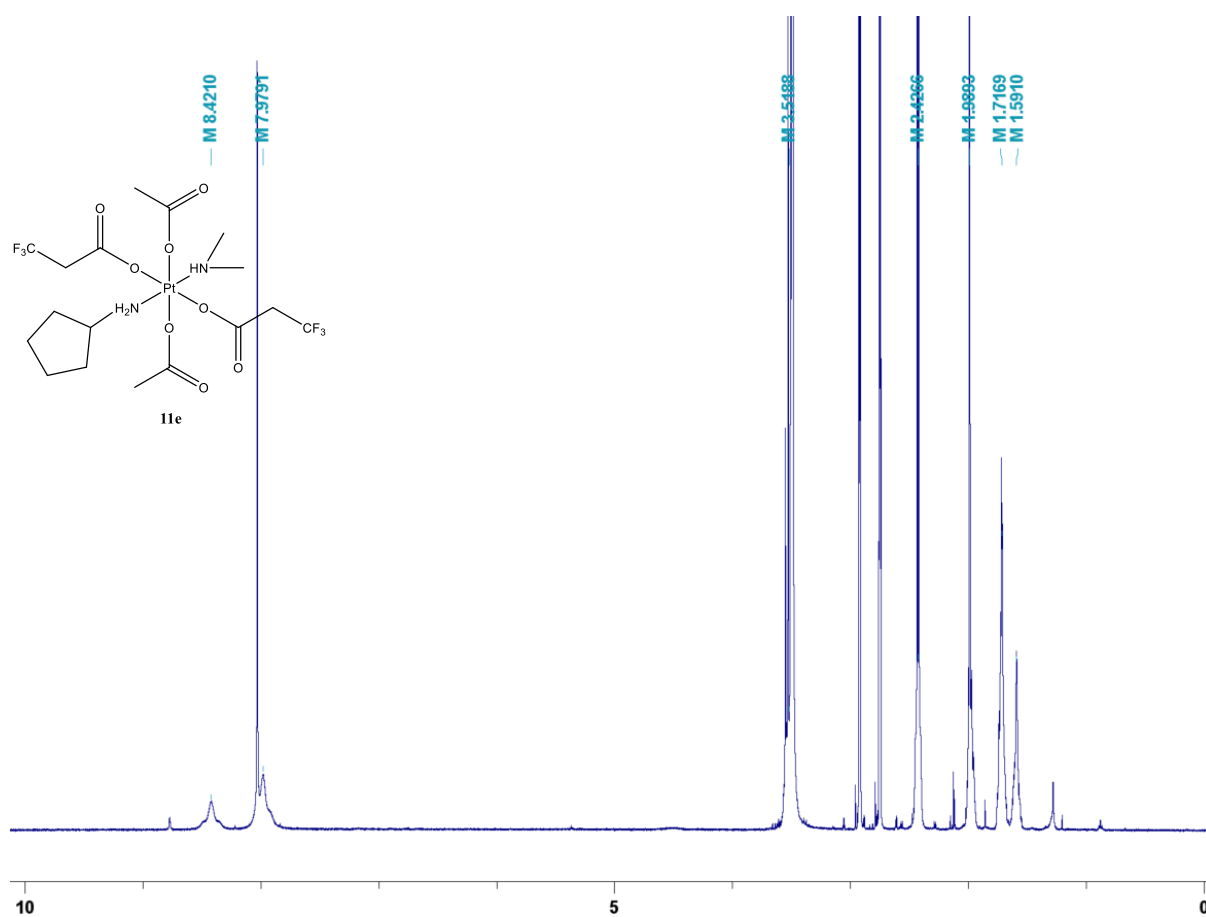

**Figure S28.**  $^1\text{H}$  NMR spectrum of **11e** in  $d_7$ -DMF.

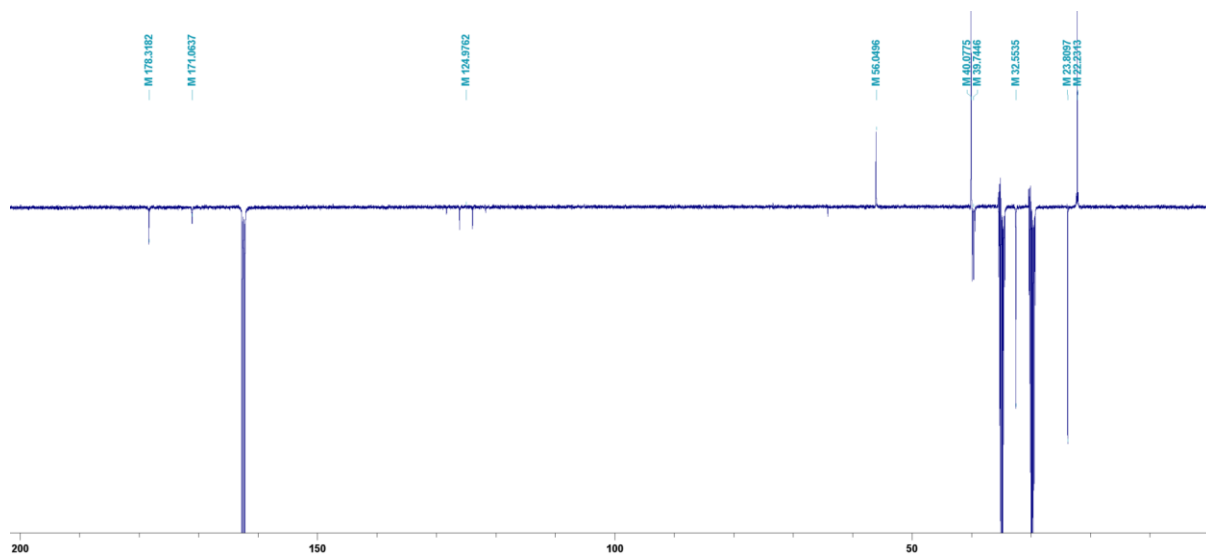

**Figure S29.**  $^{13}\text{C}$  NMR spectrum of **11e** in  $d_7$ -DMF.

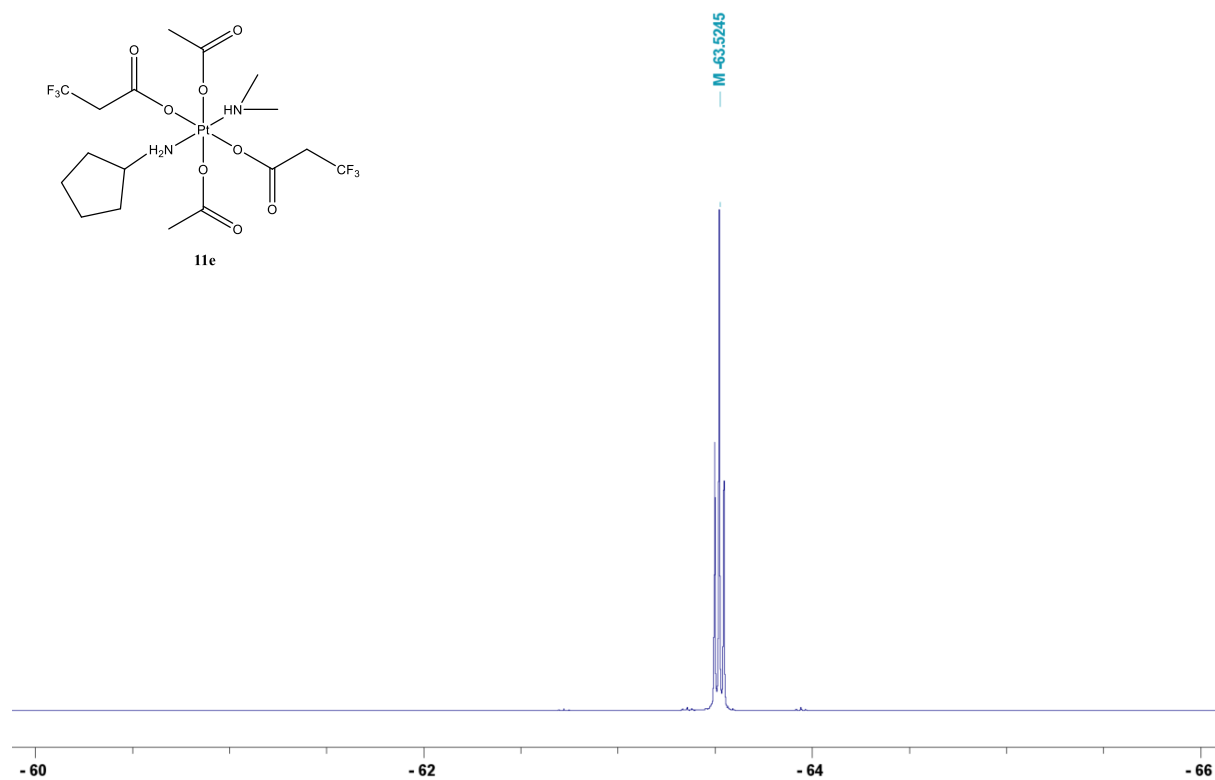

**Figure S30.**  $^{19}\text{F}$  NMR spectrum of **11e** in  $\text{d}_7\text{-DMF}$ .

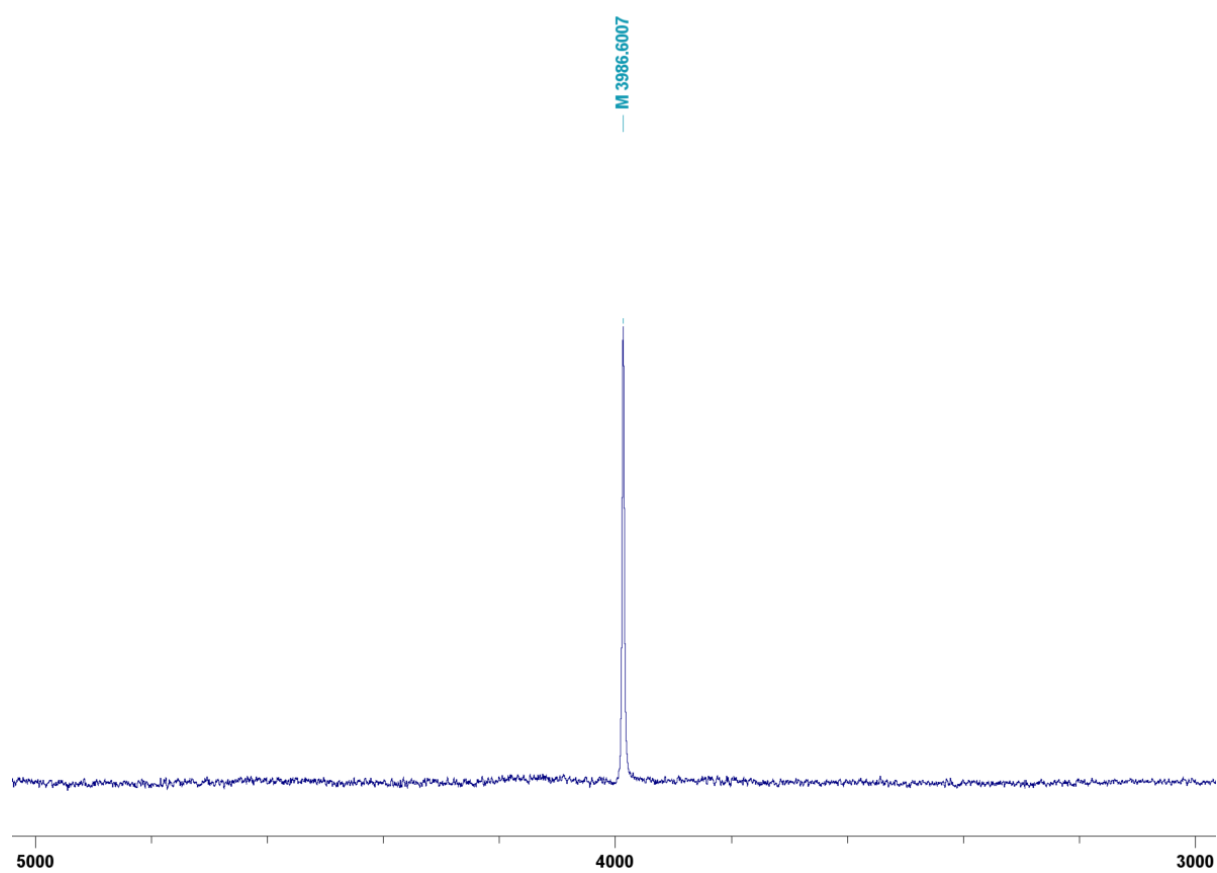

**Figure S31.**  $^{195}\text{Pt}$  NMR spectrum of **11e** in  $\text{d}_7\text{-DMF}$ .

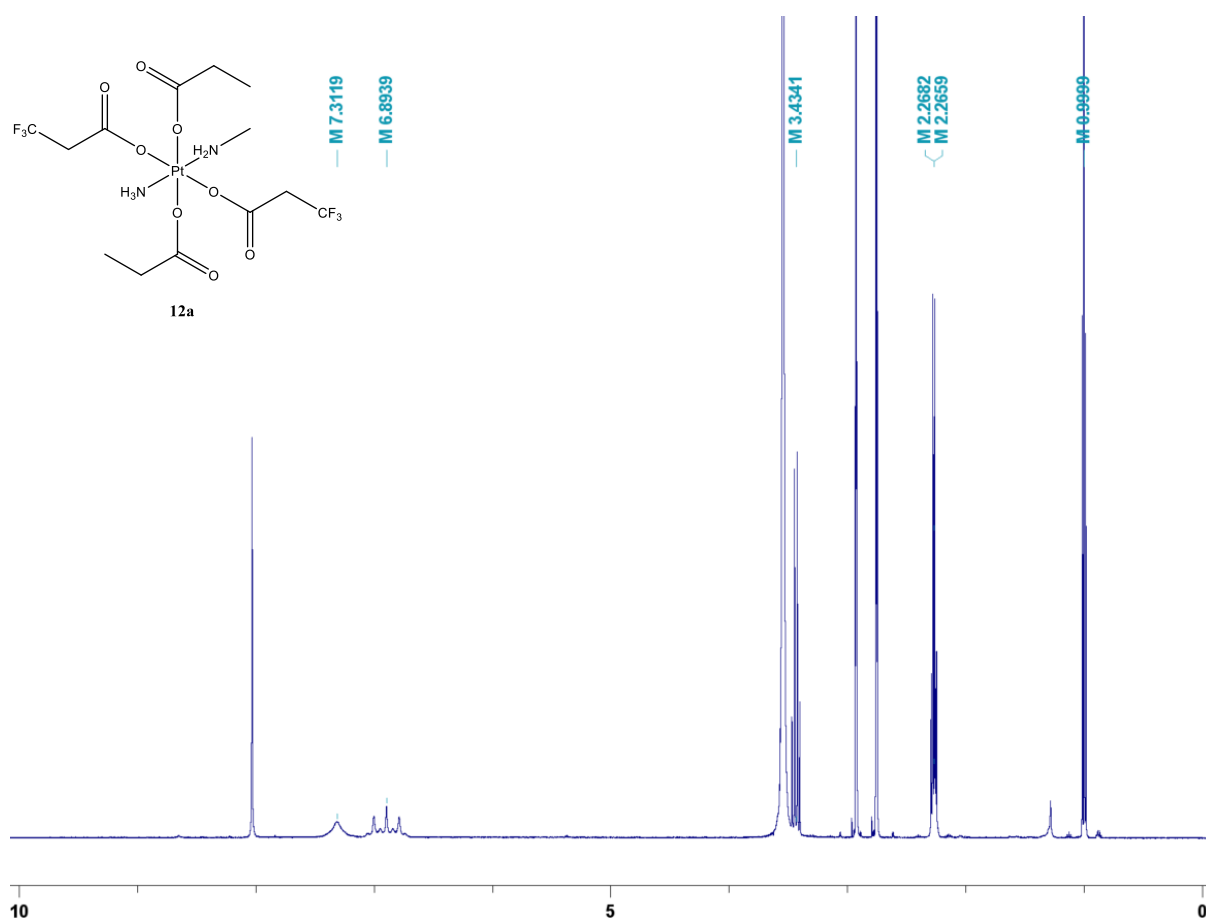

**Figure S32.**  $^1\text{H}$  NMR spectrum of **12a** in  $\text{d}_7$ -DMF.

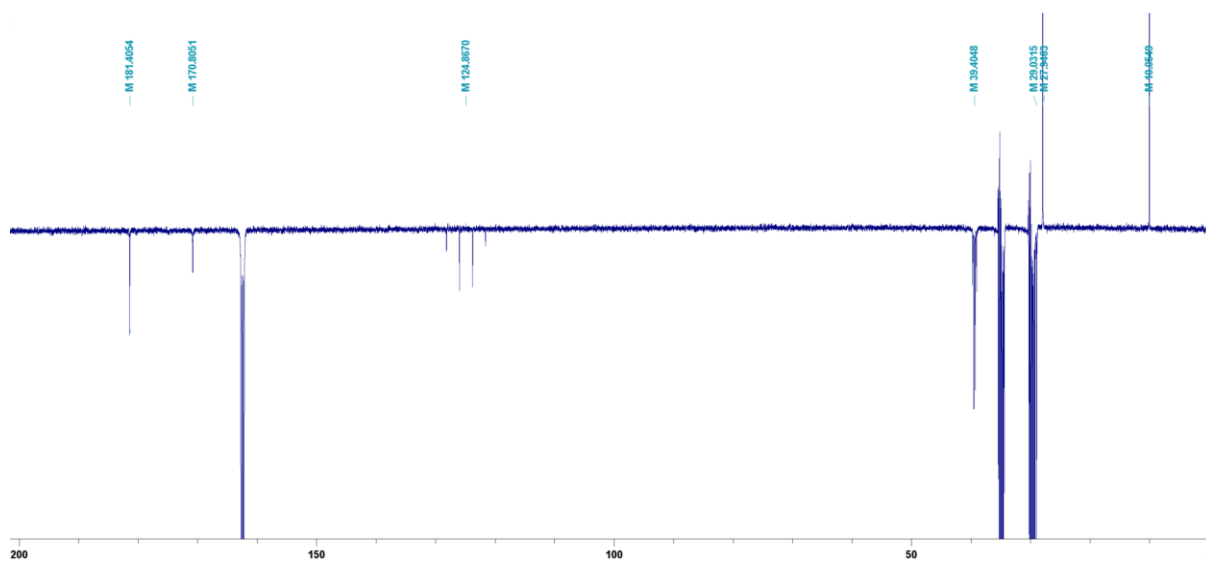

**Figure S33.**  $^{13}\text{C}$  NMR spectrum of **12a** in  $\text{d}_7$ -DMF.

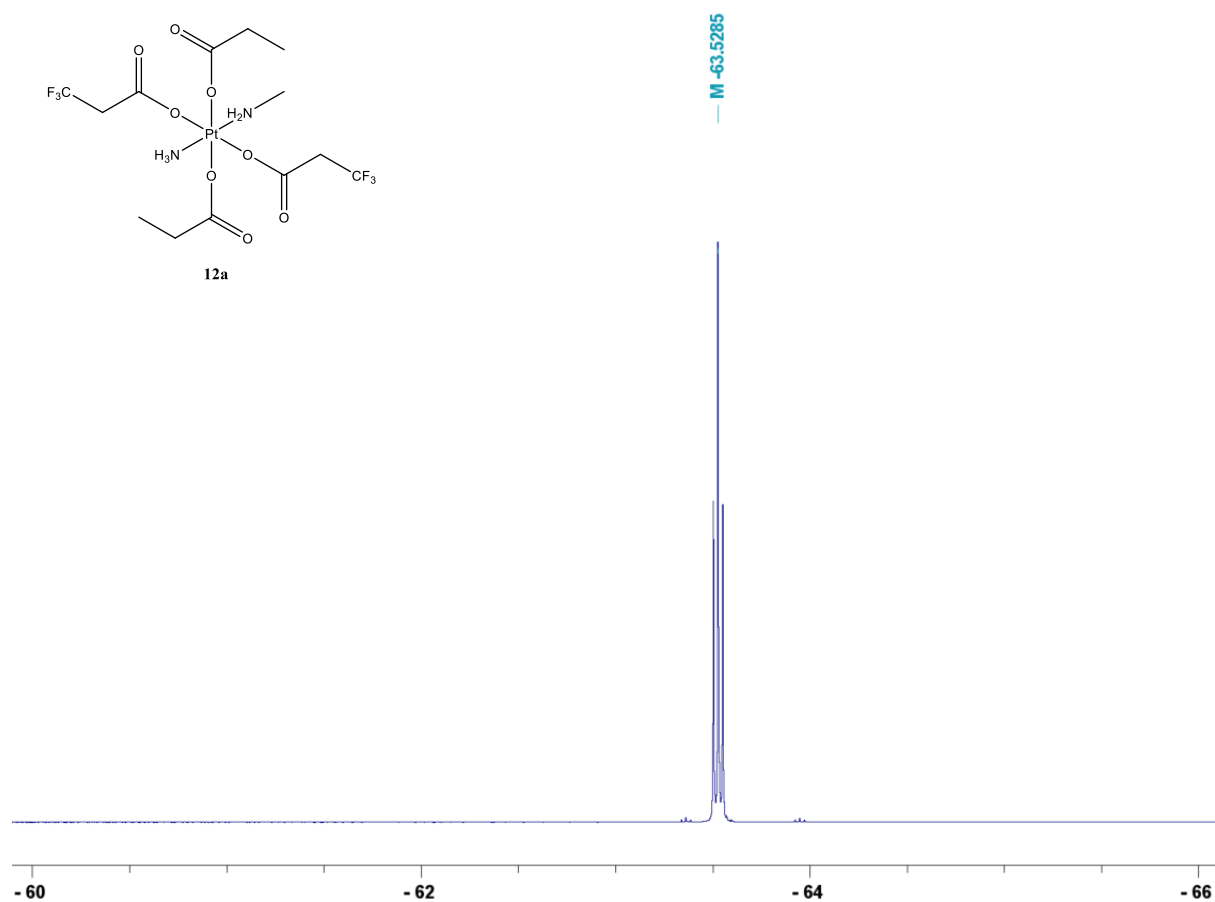

**Figure S34.** <sup>19</sup>F NMR spectrum of **12a** in d<sub>7</sub>-DMF.

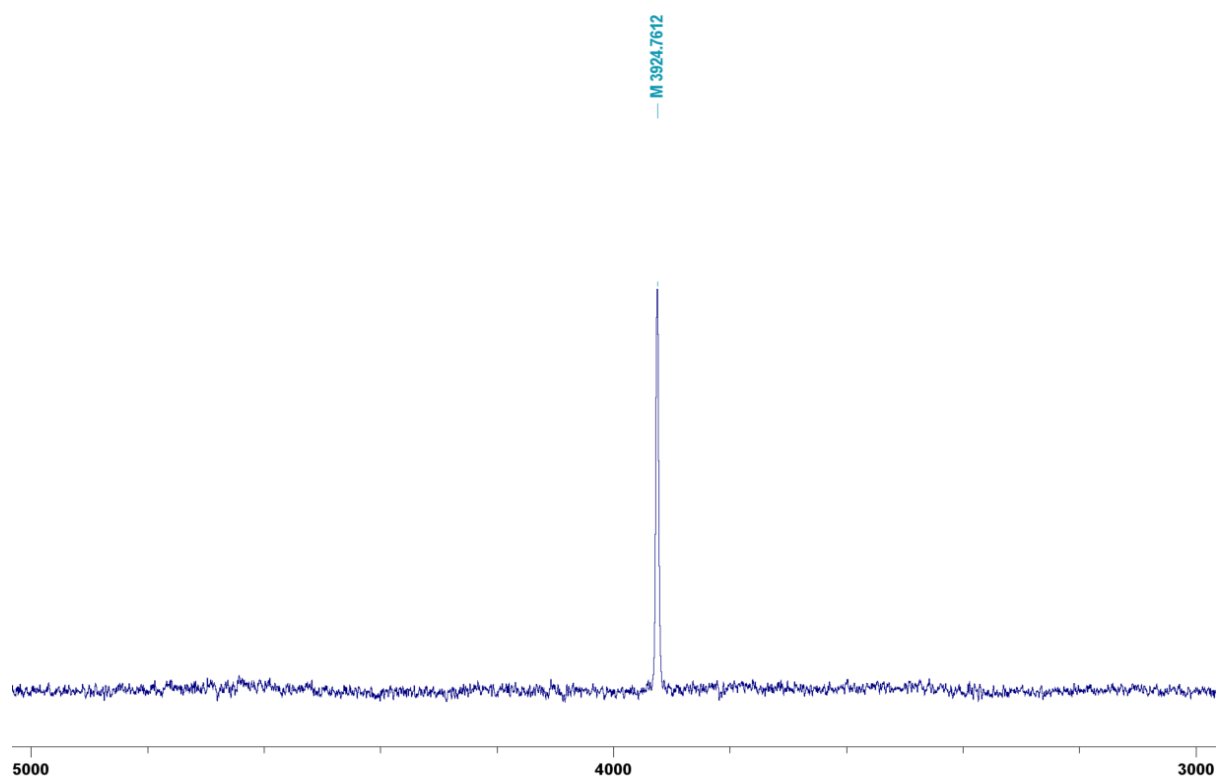

**Figure S35.** <sup>195</sup>Pt NMR spectrum of **12a** in d<sub>7</sub>-DMF.

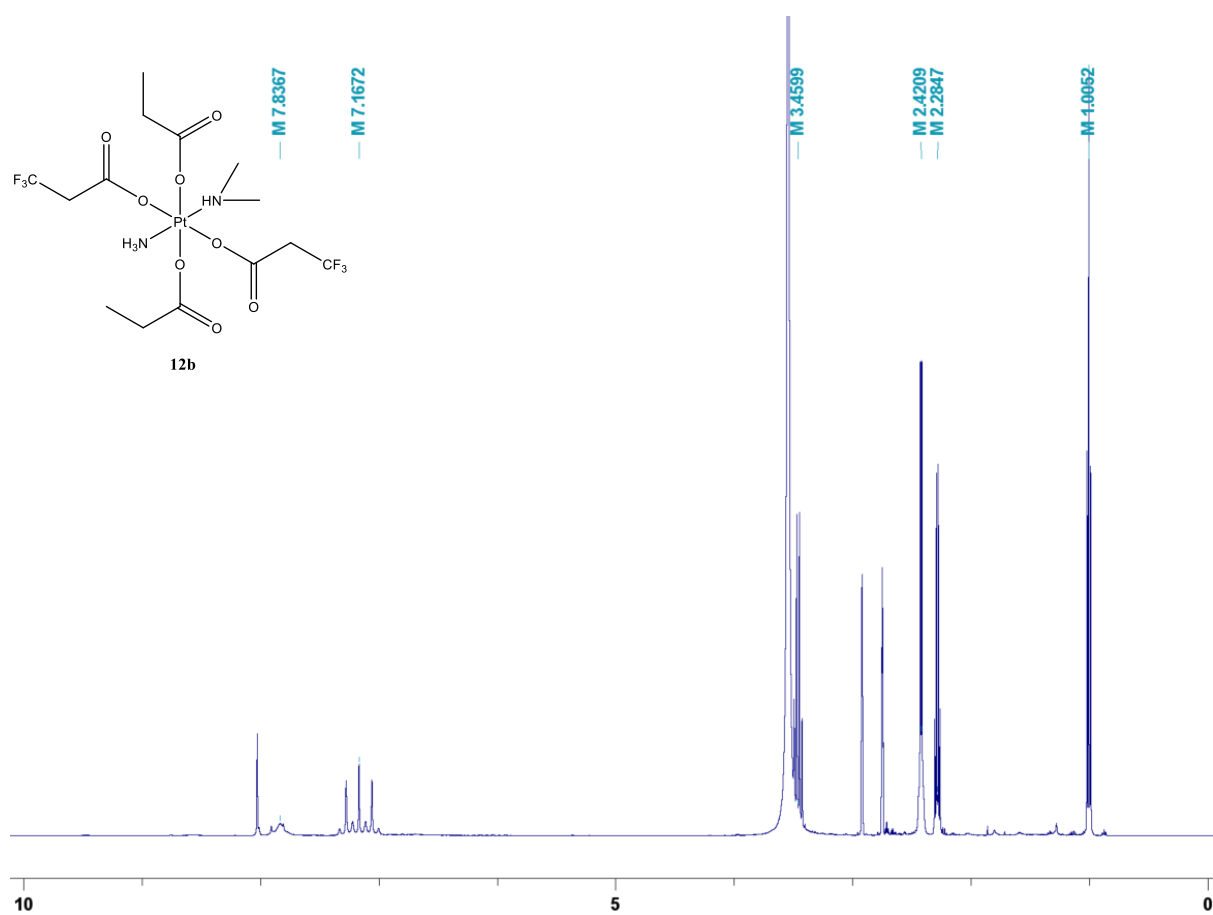

**Figure S36.**  $^1\text{H}$  NMR spectrum of **12b** in  $\text{d}_7\text{-DMF}$ .

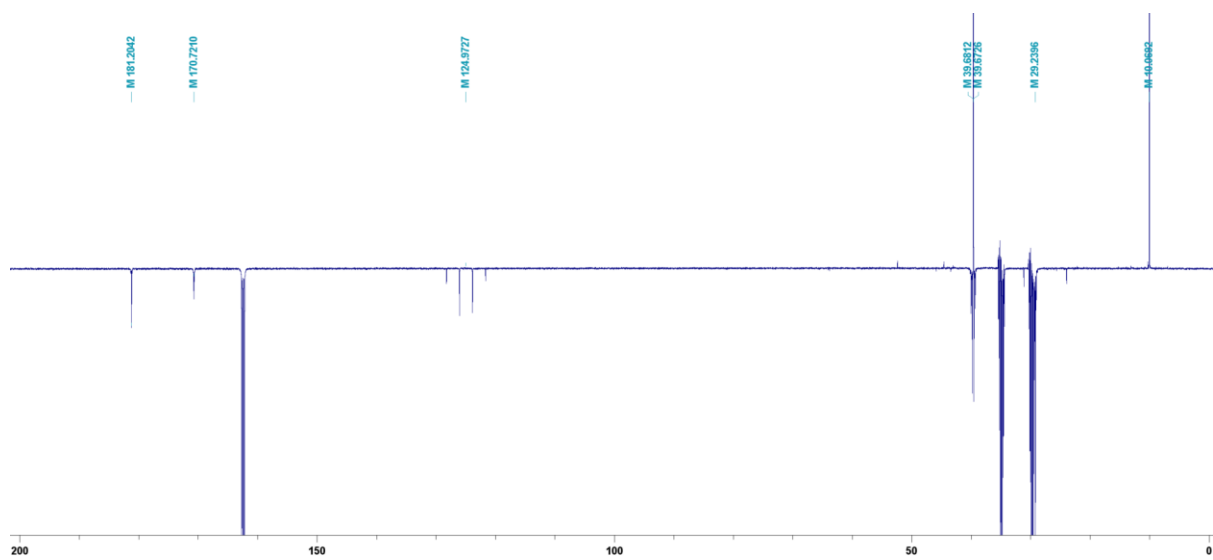

**Figure S37.**  $^{13}\text{C}$  NMR spectrum of **12b** in  $\text{d}_7\text{-DMF}$ .

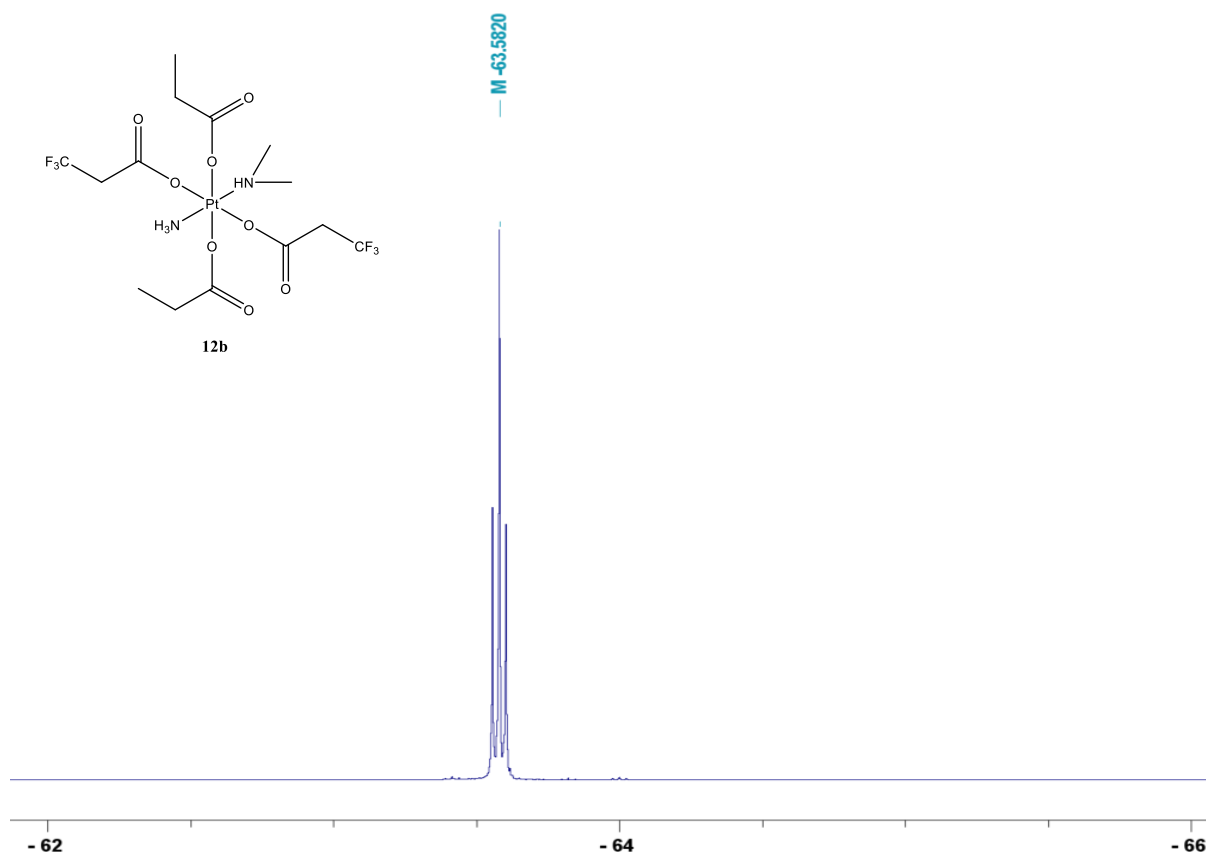

**Figure S38.**  $^{19}\text{F}$  NMR spectrum of **12b** in  $\text{d}_7$ -DMF.

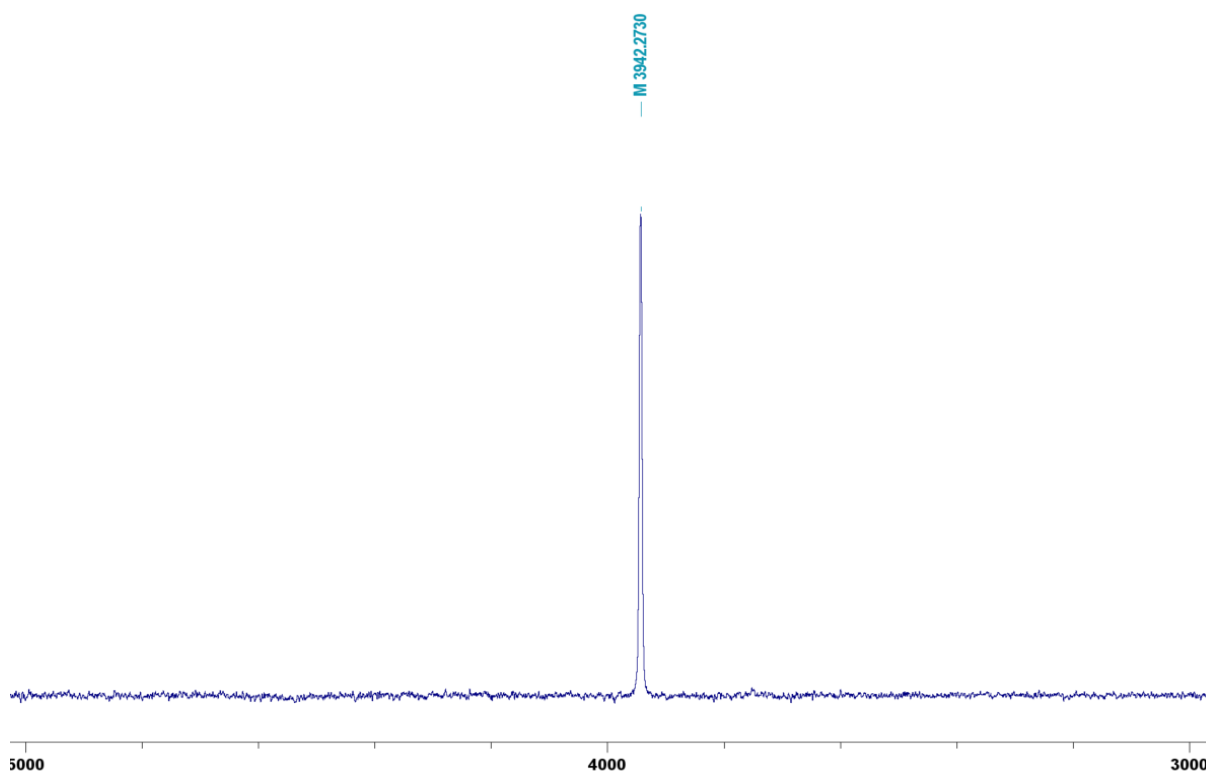

**Figure S39.**  $^{195}\text{Pt}$  NMR spectrum of **12b** in  $\text{d}_7$ -DMF.

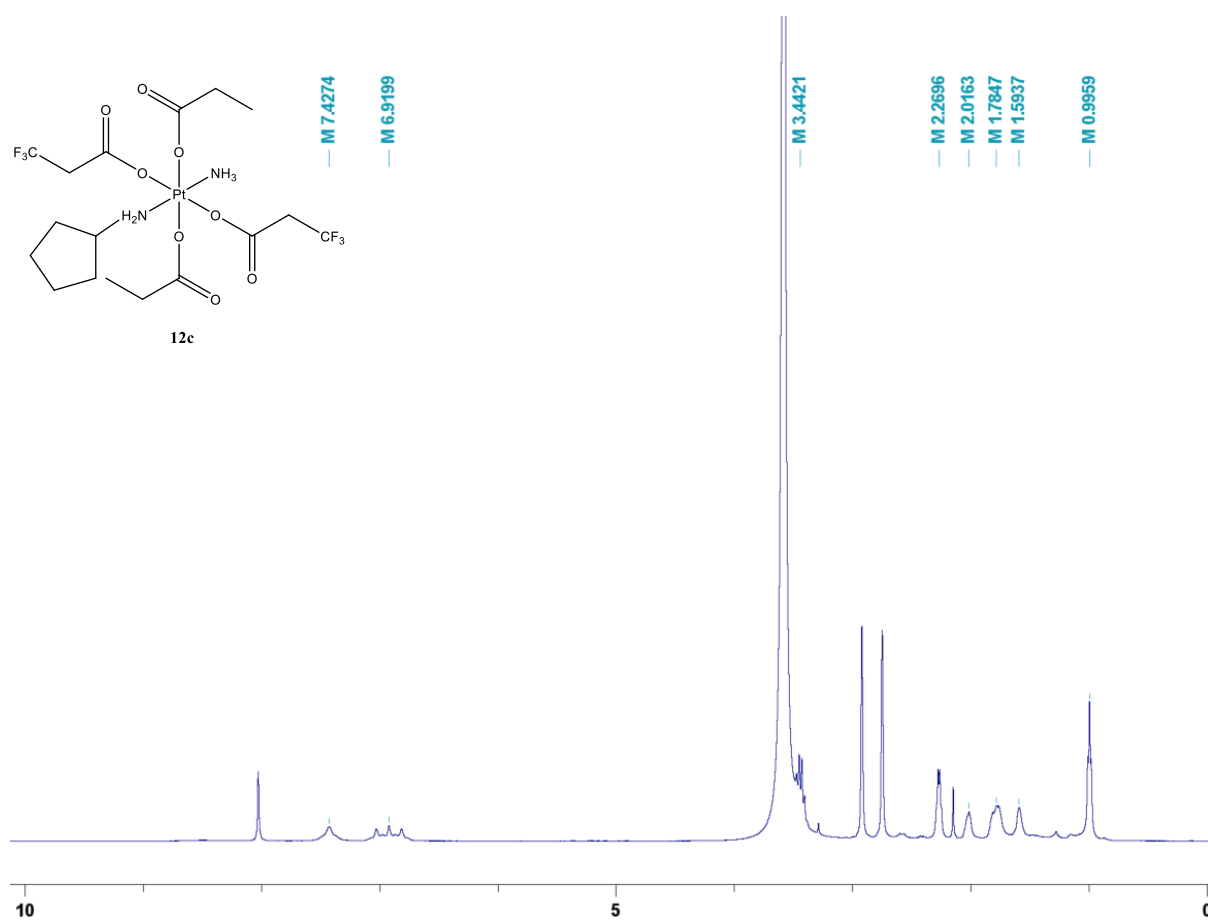

**Figure S40.**  $^1\text{H}$  NMR spectrum of **12c** in  $\text{d}_7\text{-DMF}$ .

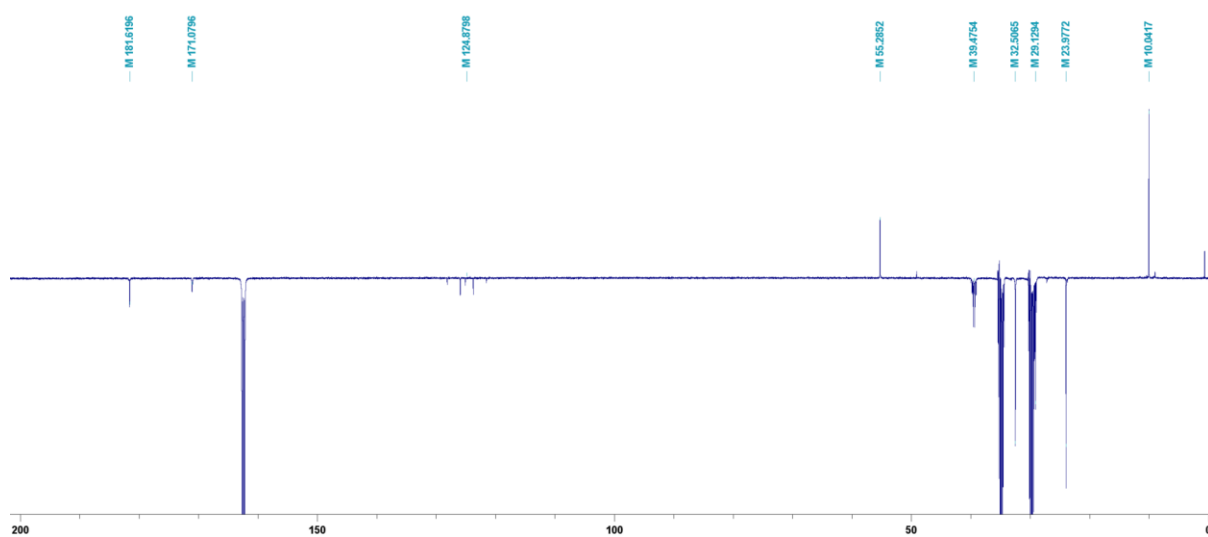

**Figure S41.**  $^{13}\text{C}$  NMR spectrum of **12c** in  $\text{d}_7\text{-DMF}$ .

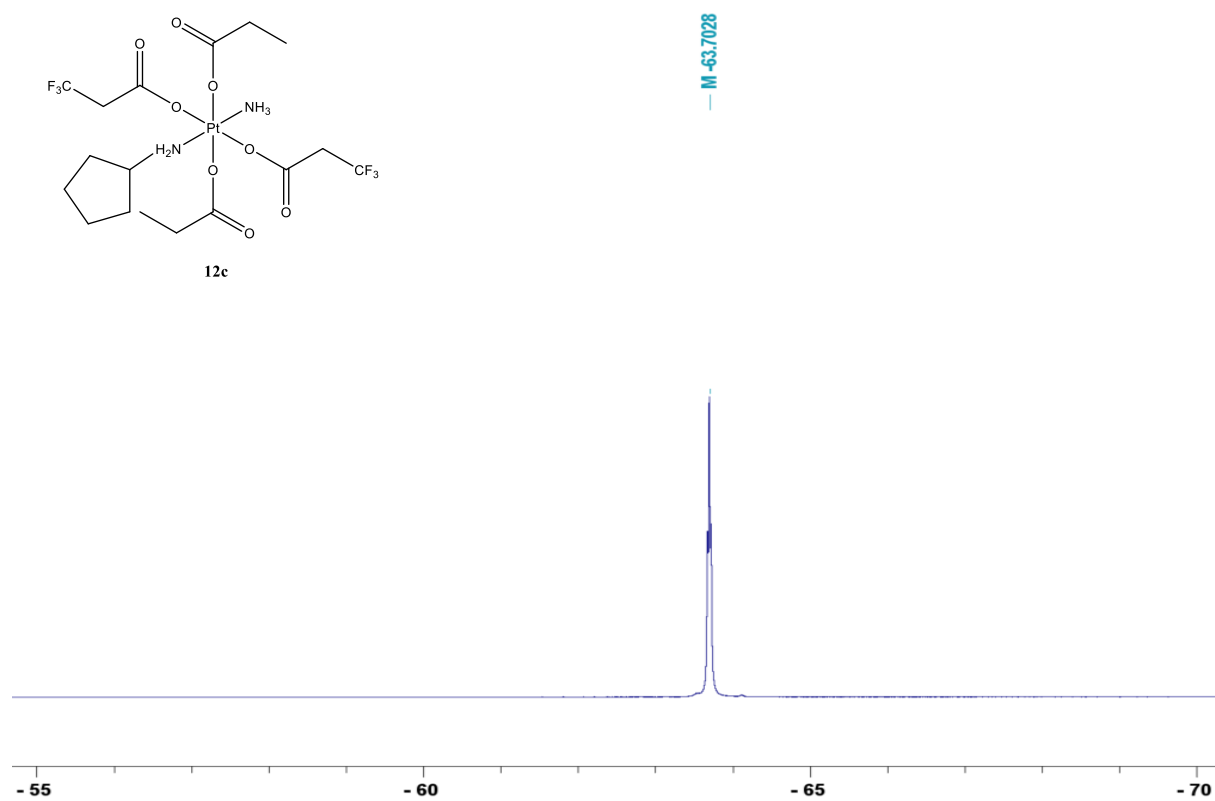

**Figure S42.**  $^{19}\text{F}$  NMR spectrum of **12c** in  $\text{d}_7$ -DMF.

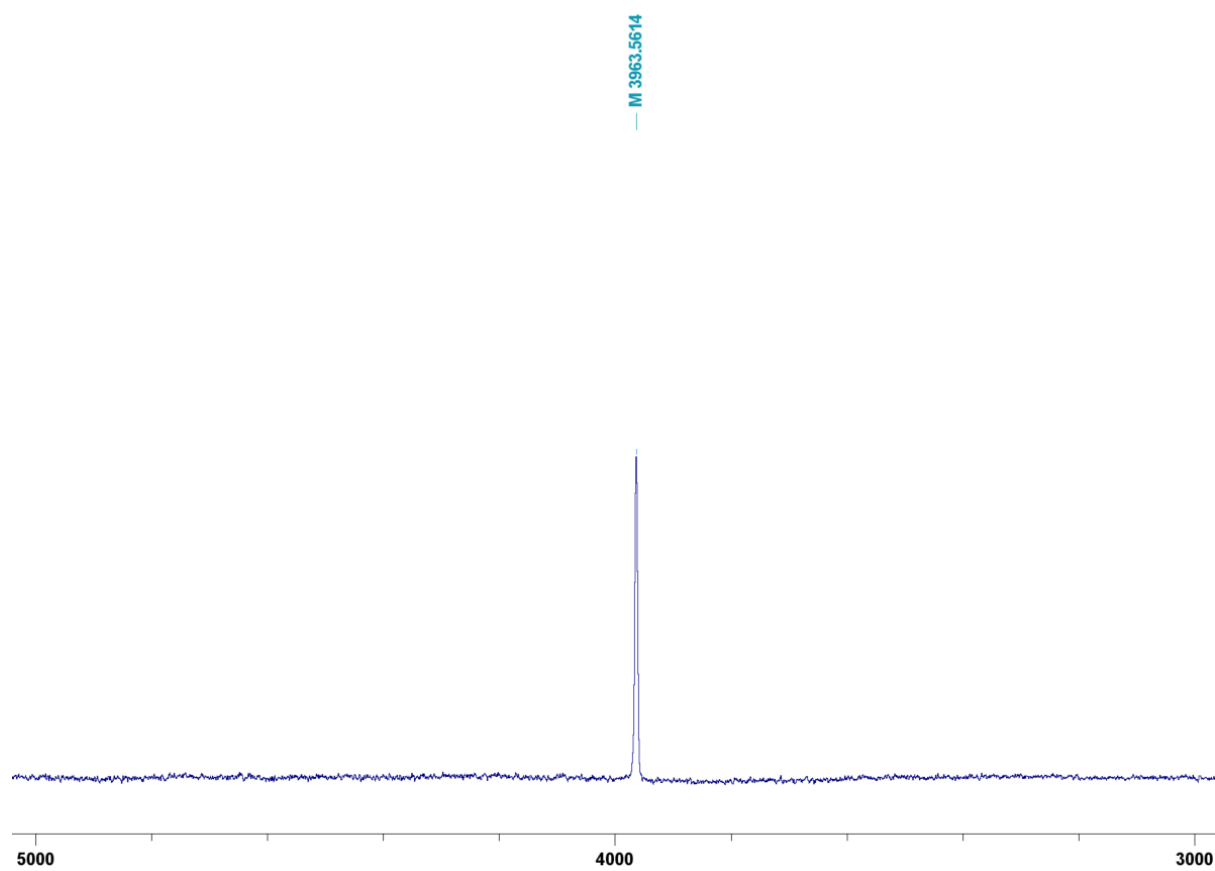

**Figure S43.**  $^{195}\text{Pt}$  NMR spectrum of **12c** in  $\text{d}_7$ -DMF.



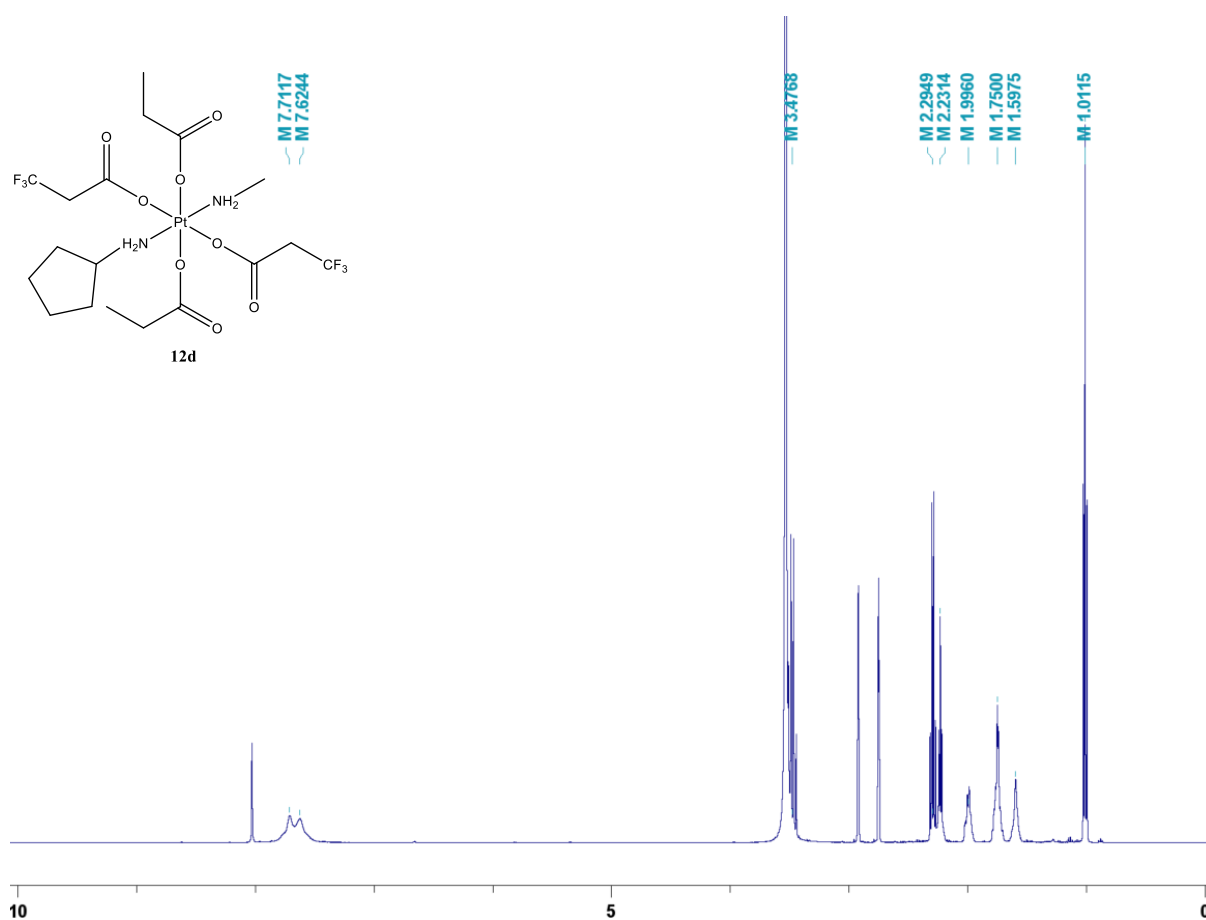

**Figure S44.** <sup>1</sup>H NMR spectrum of **12d** in d<sub>7</sub>-DMF.

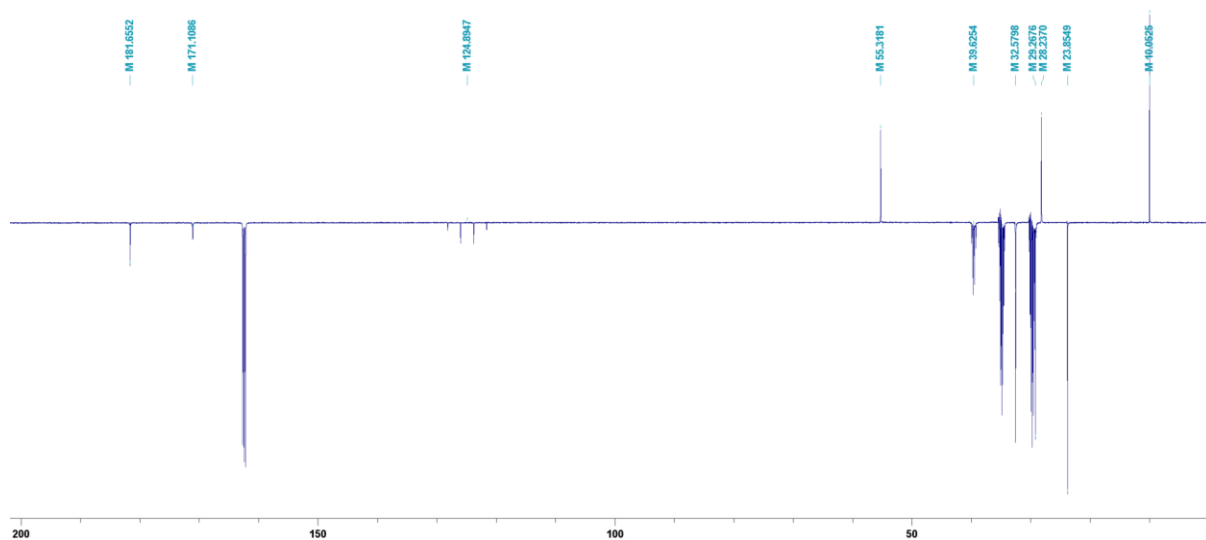

**Figure S45.** <sup>13</sup>C NMR spectrum of **12d** in d<sub>7</sub>-DMF.

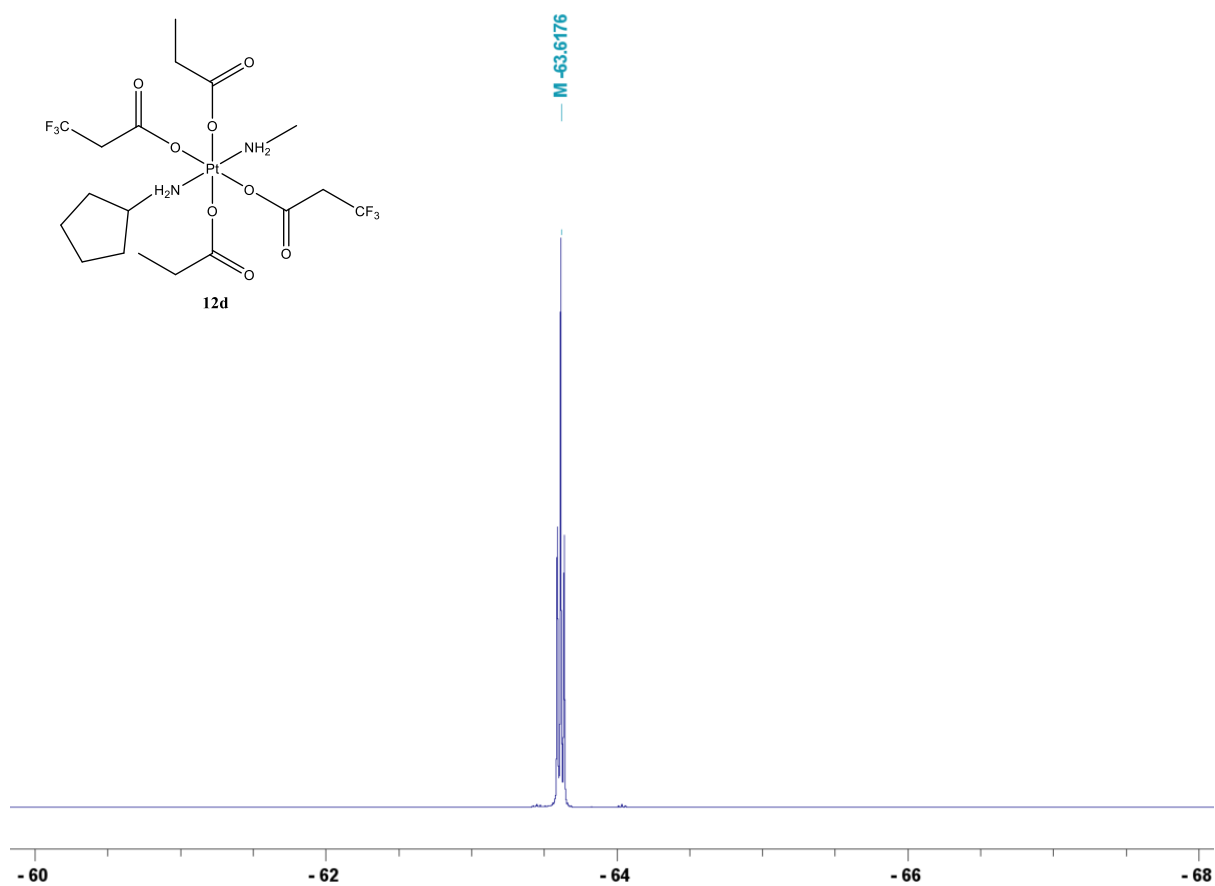

**Figure S46.**  $^{19}\text{F}$  NMR spectrum of **12d** in  $\text{d}_7$ -DMF.

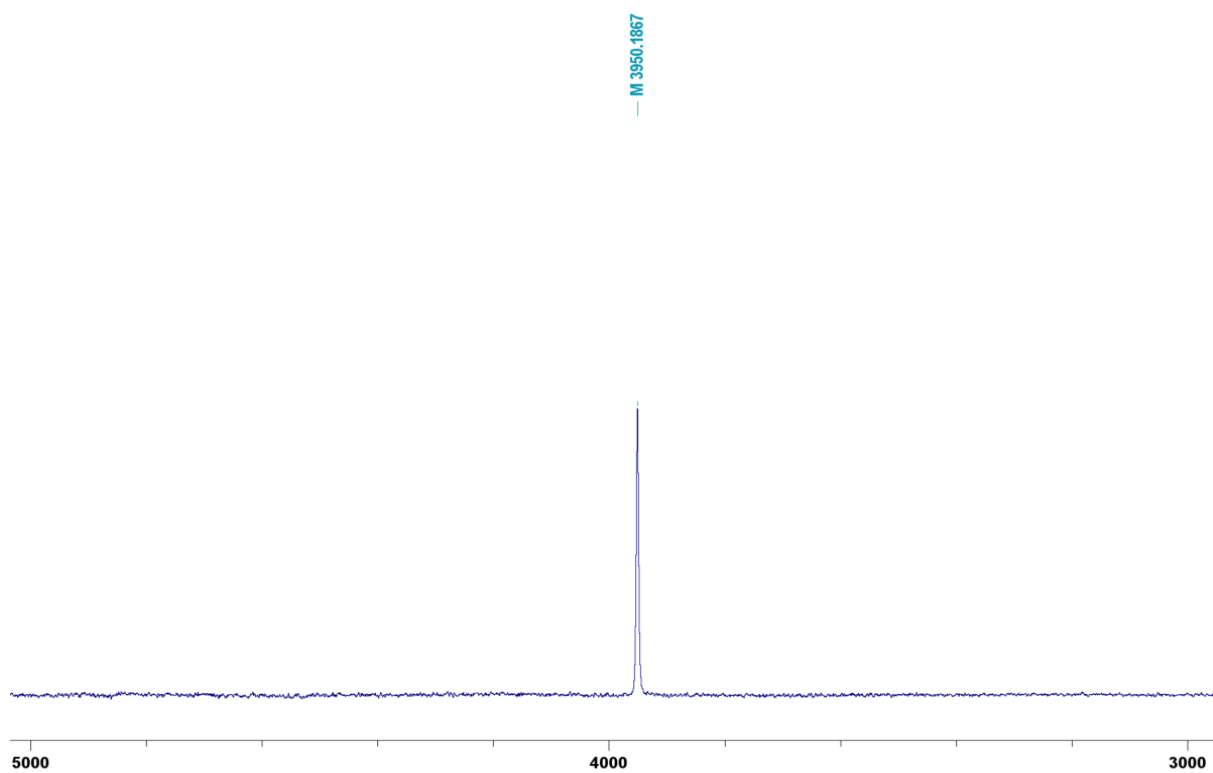

**Figure S47.**  $^{195}\text{Pt}$  NMR spectrum of **12d** in  $\text{d}_7$ -DMF.

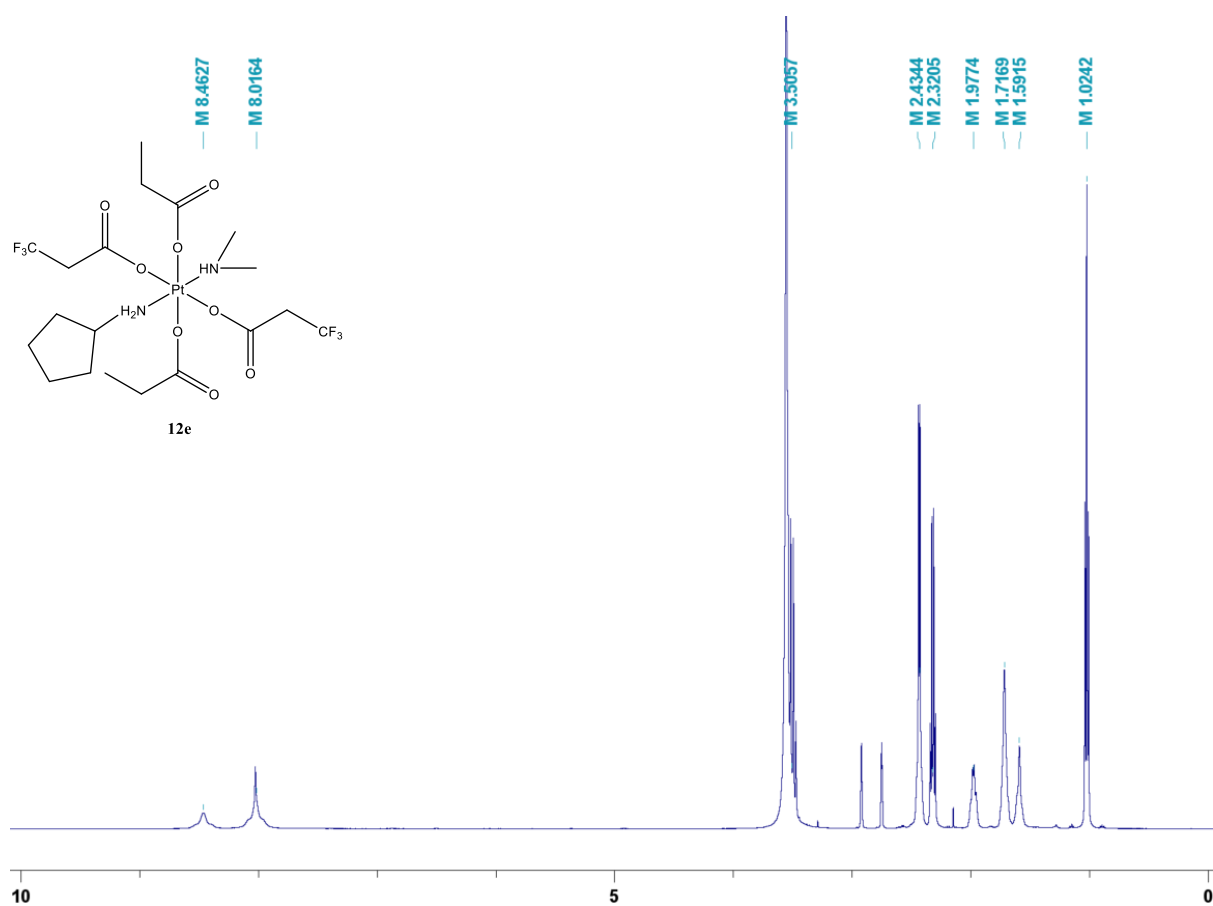

**Figure S48.**  $^1\text{H}$  NMR spectrum of **12e** in  $\text{d}_7\text{-DMF}$ .

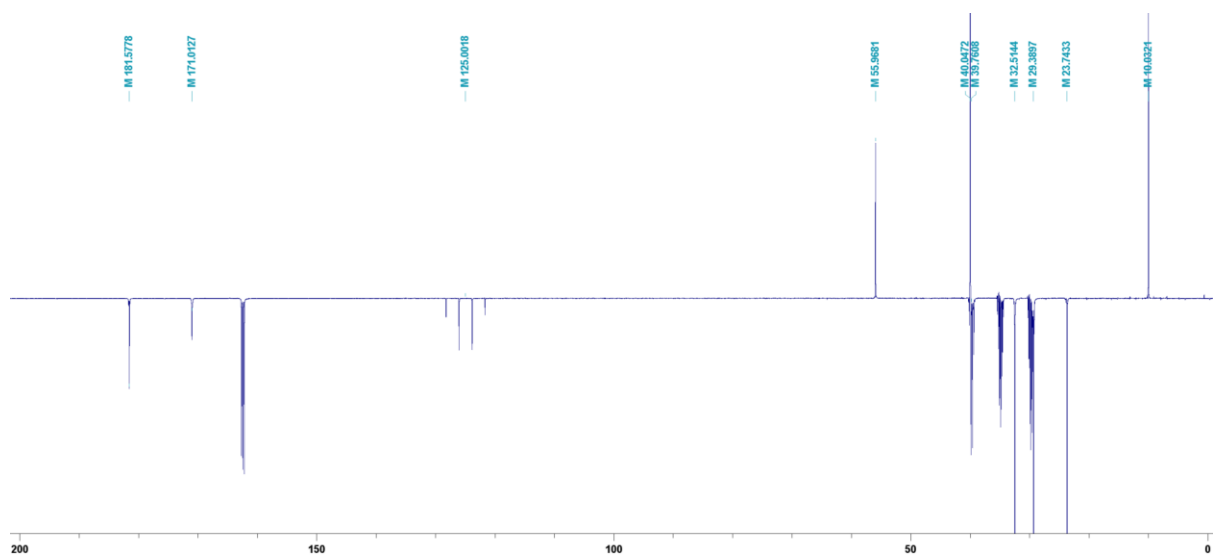

**Figure S49.**  $^{13}\text{C}$  NMR spectrum of **12e** in  $\text{d}_7\text{-DMF}$ .

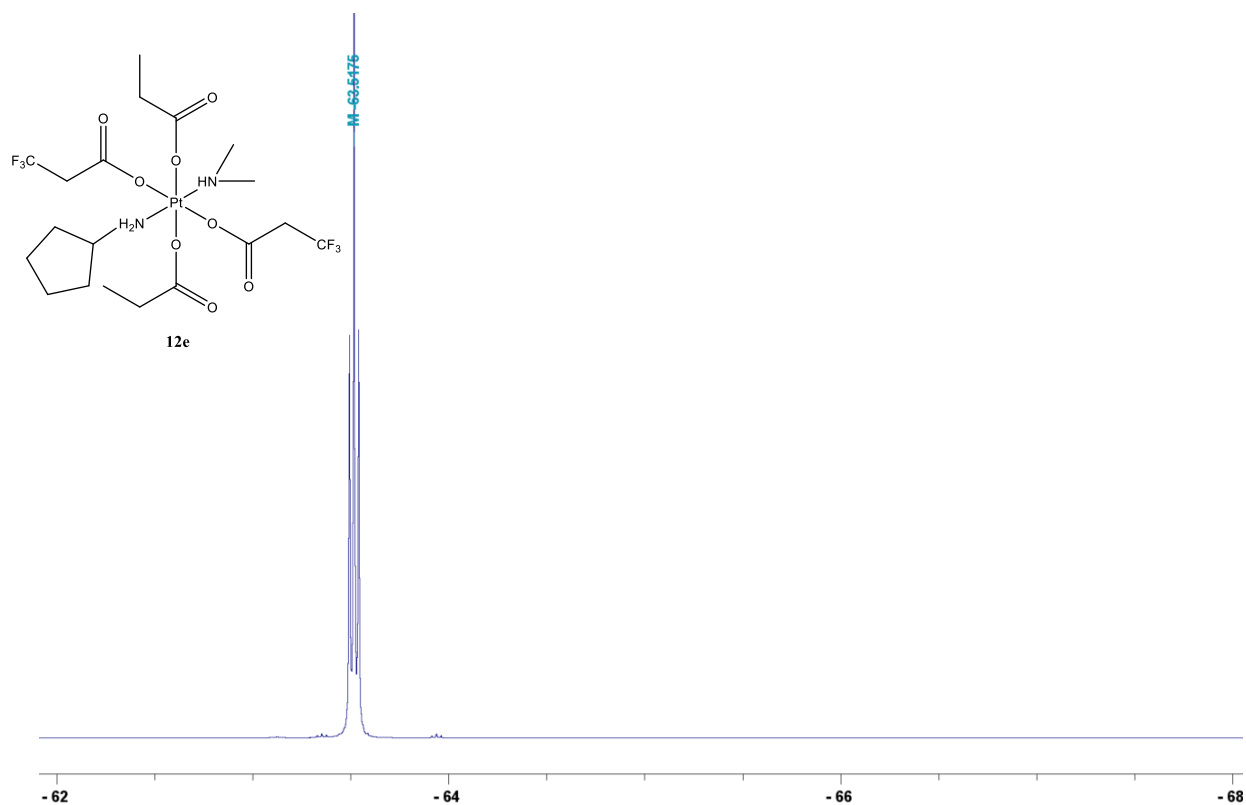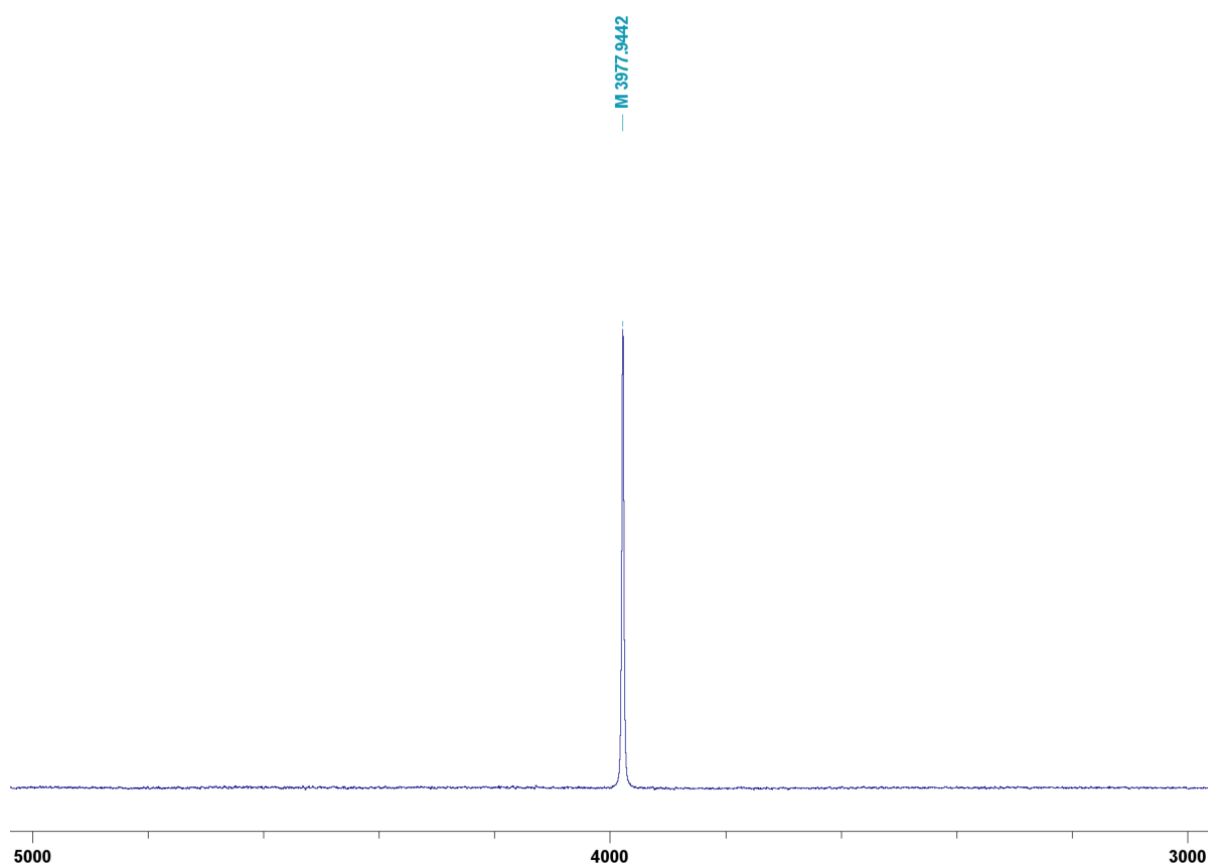

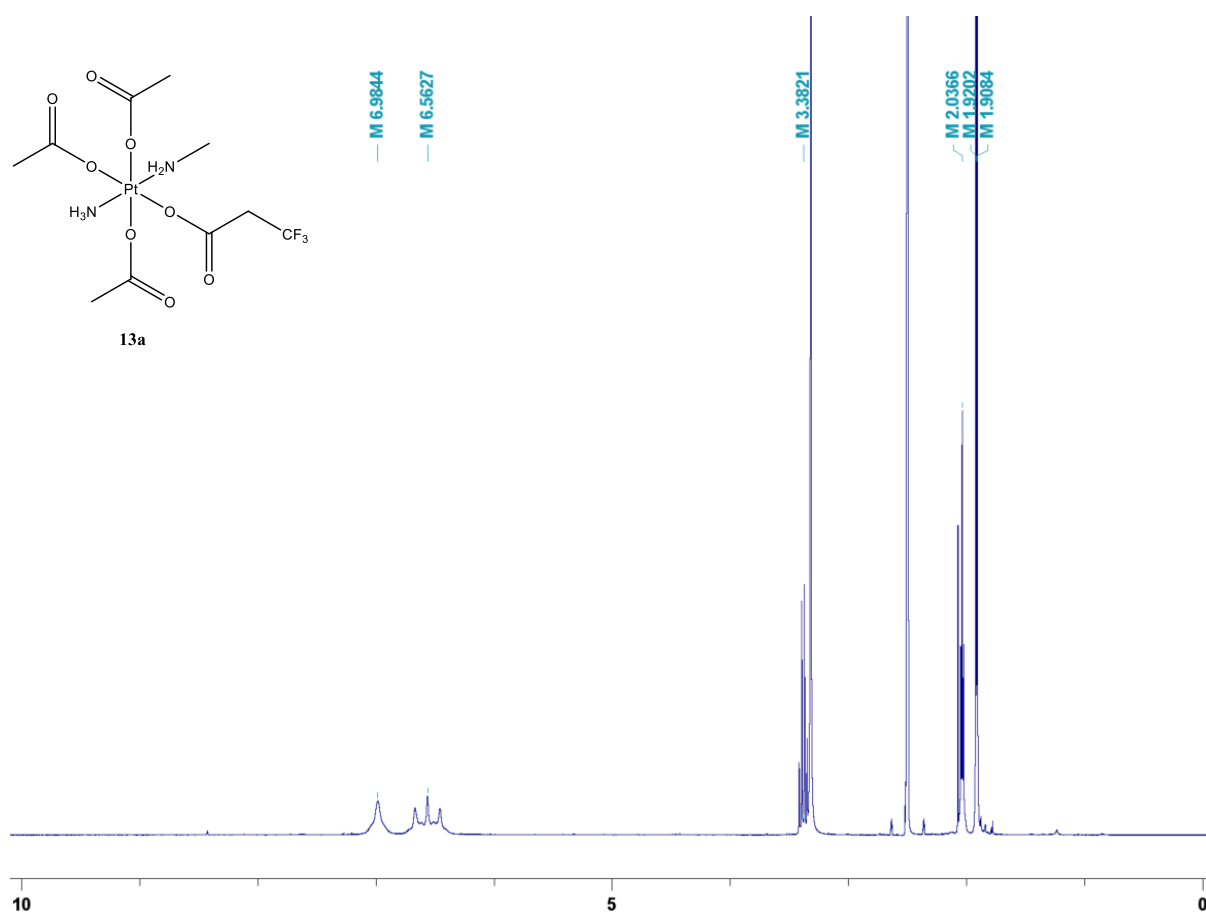

**Figure S52.** <sup>1</sup>H NMR spectrum of **13a** in d<sub>6</sub>-DMSO.

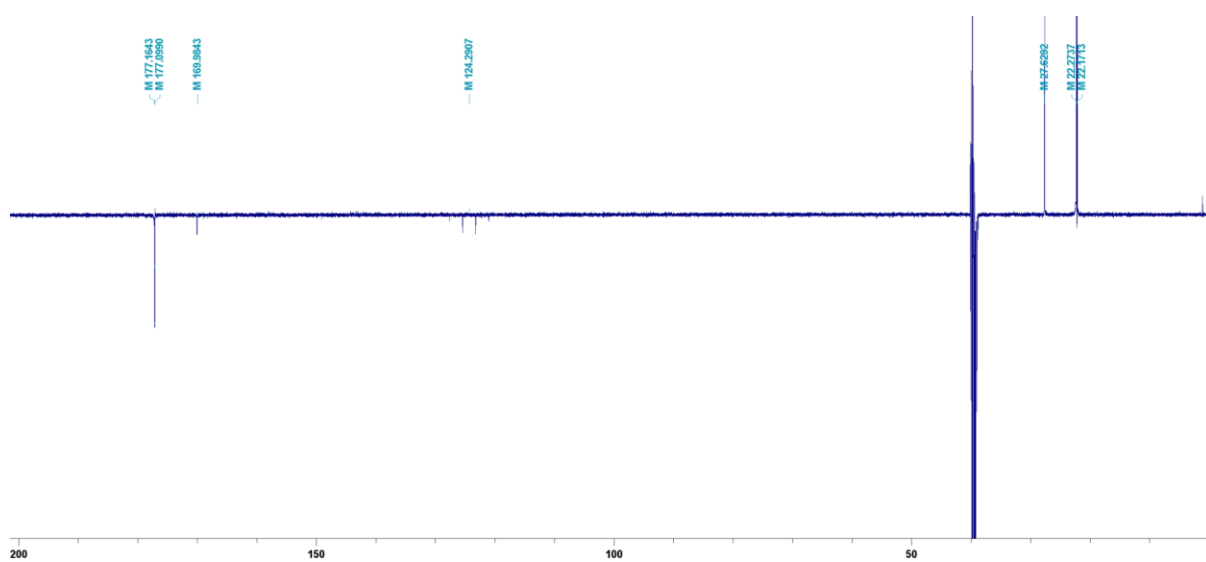

**Figure S53.** <sup>13</sup>C NMR spectrum of **13a** in d<sub>6</sub>-DMSO.

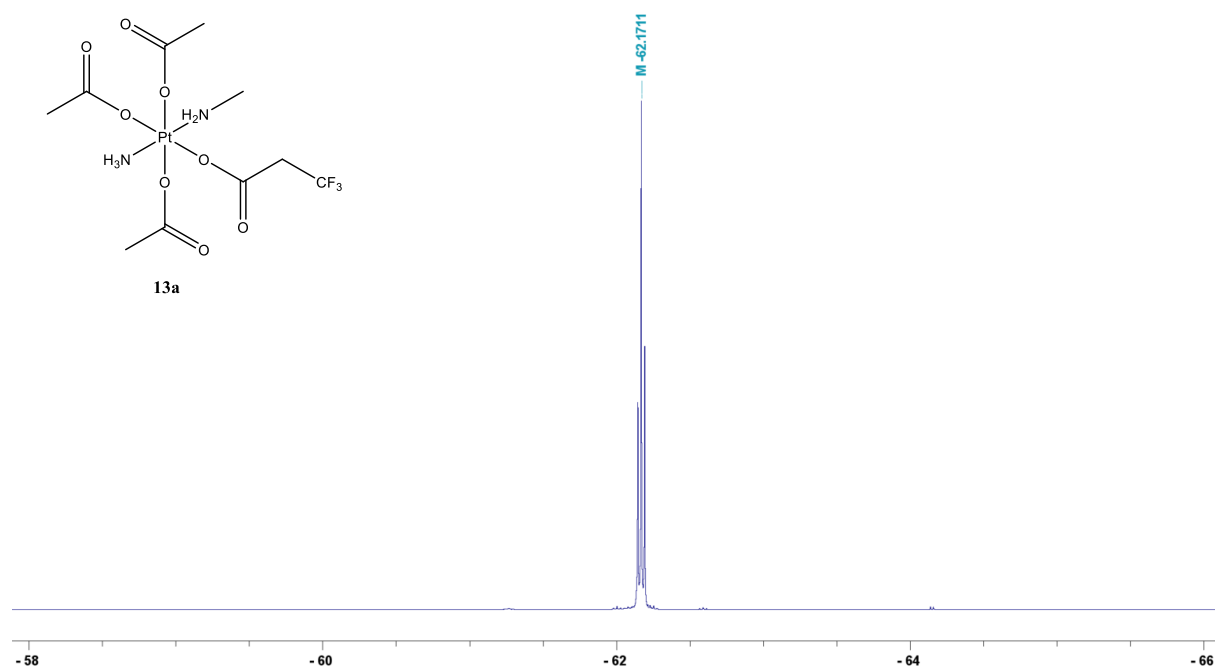

**Figure S54.**  $^{19}\text{F}$  NMR spectrum of **13a** in  $\text{d}_6$ -DMSO.

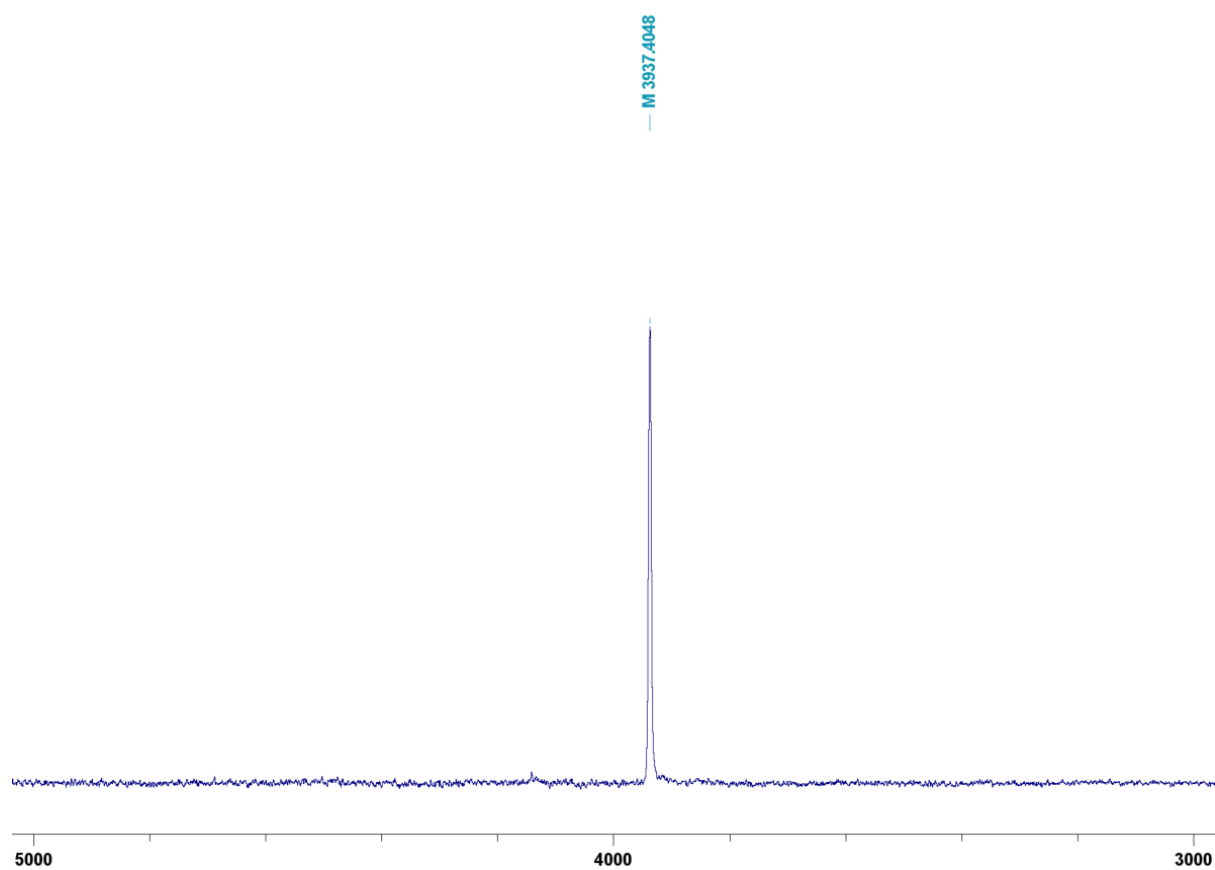

**Figure S55.**  $^{195}\text{Pt}$  NMR spectrum of **13a** in  $\text{d}_6$ -DMSO.

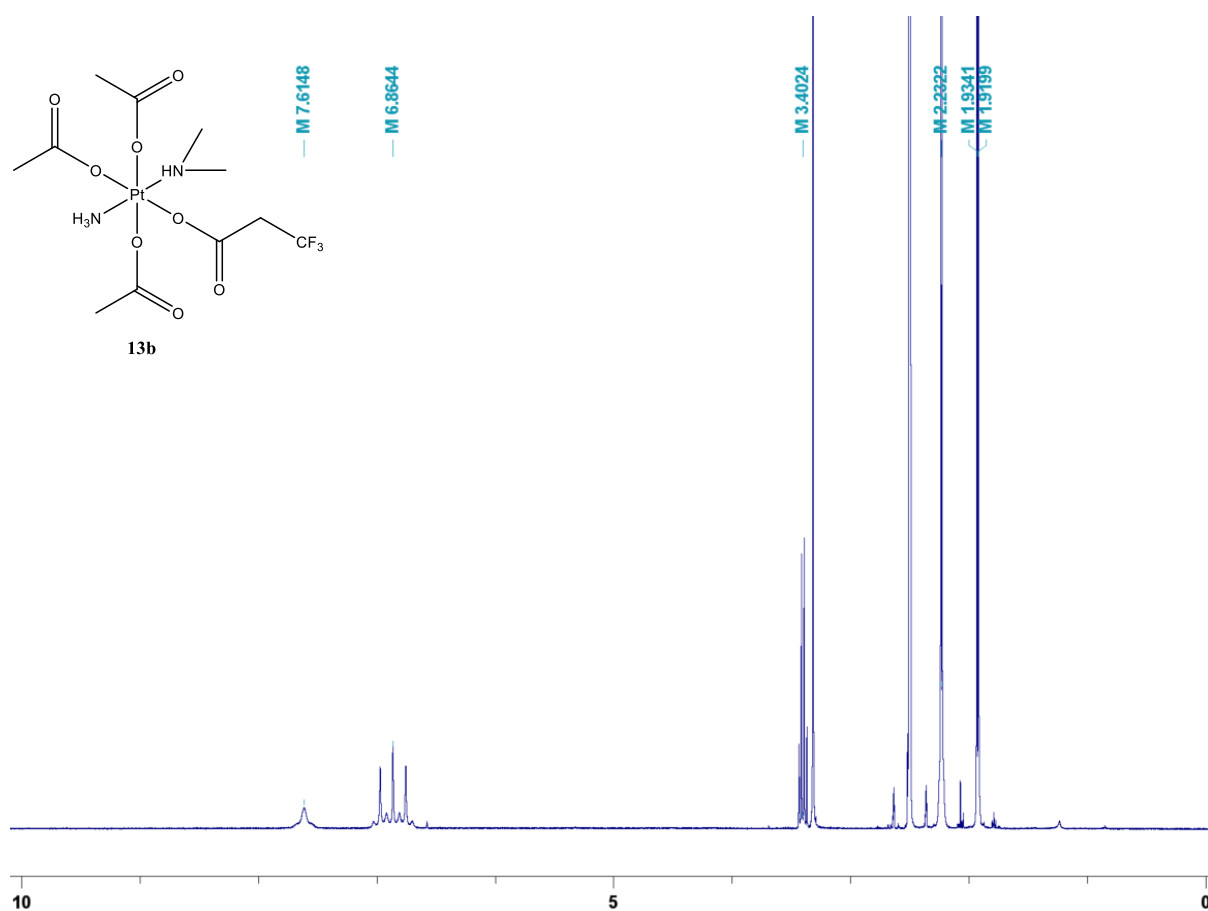

**Figure S56.**  $^1\text{H}$  NMR spectrum of **13b** in  $\text{d}_6$ -DMSO.

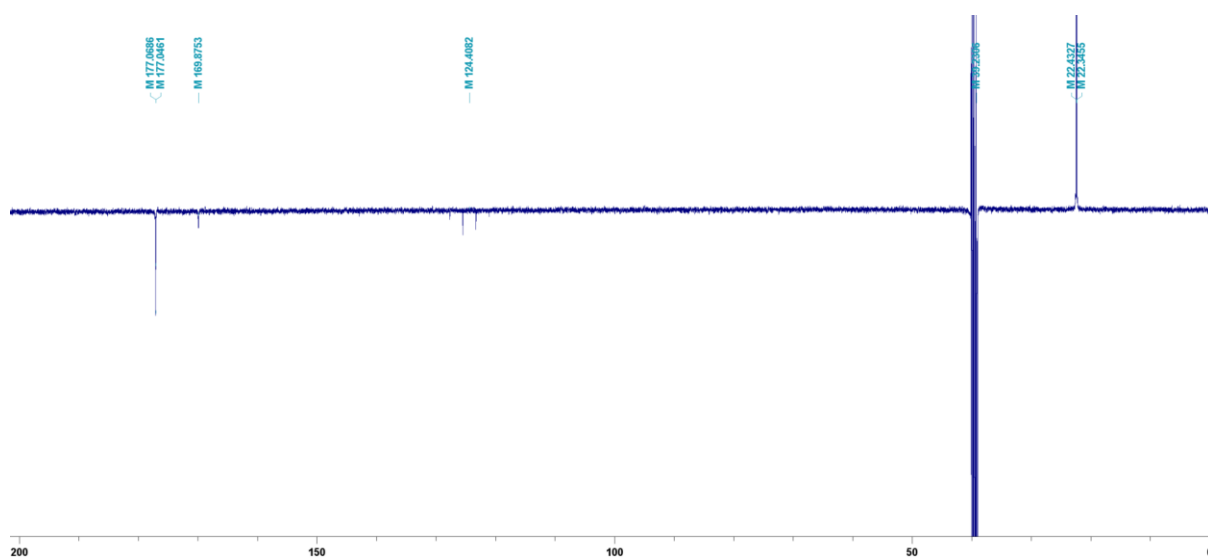

**Figure S57.**  $^{13}\text{C}$  NMR spectrum of **13b** in  $\text{d}_6$ -DMSO.

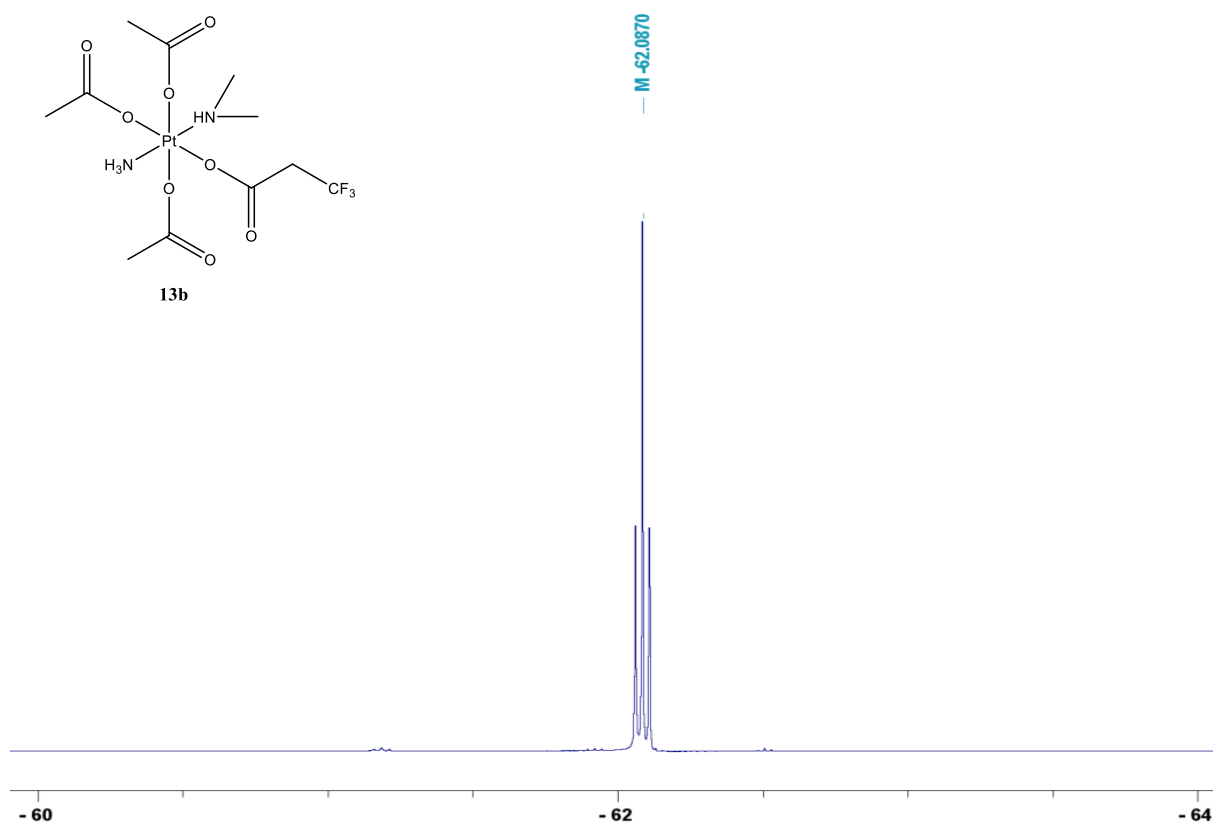

**Figure S58.**  $^{19}\text{F}$  NMR spectrum of **13b** in  $\text{d}_6$ -DMSO.

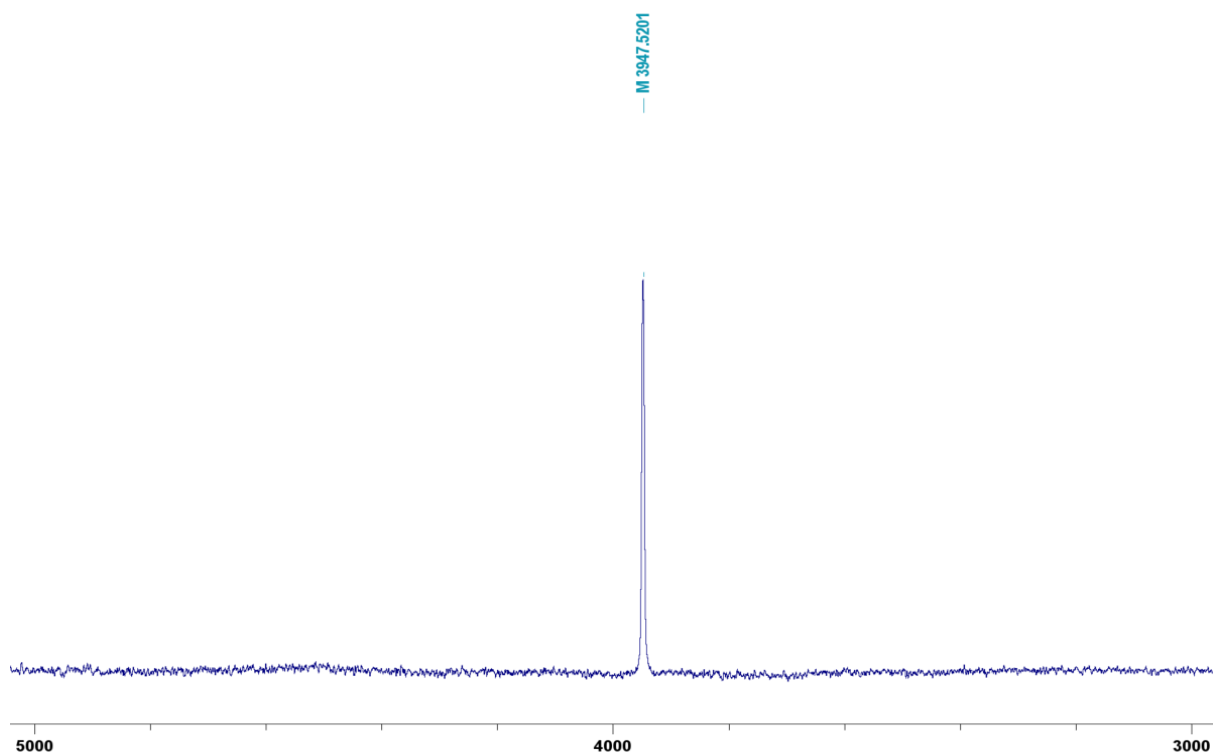

**Figure S59.**  $^{195}\text{Pt}$  NMR spectrum of **13b** in  $\text{d}_6$ -DMSO.



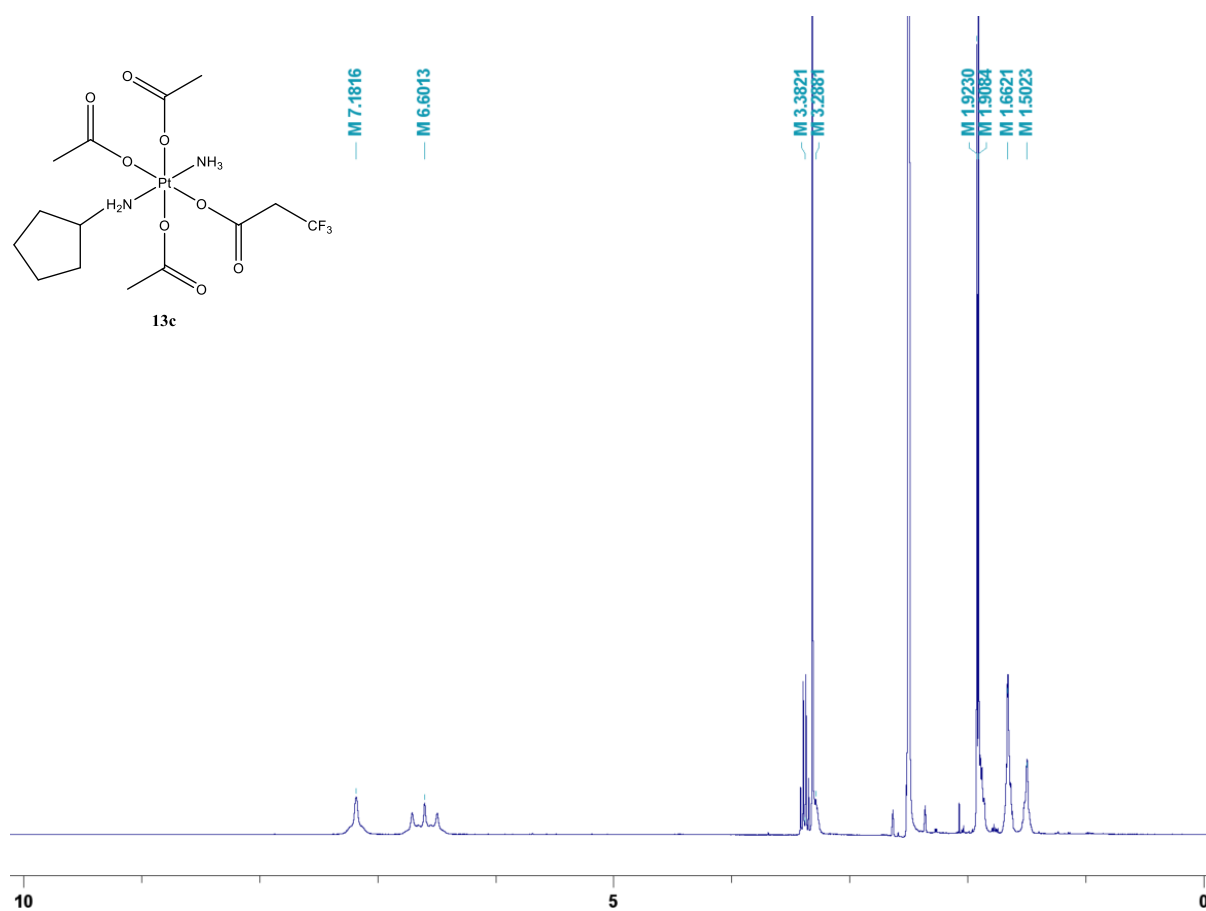

**Figure S60.** <sup>1</sup>H NMR spectrum of **13c** in d<sub>6</sub>-DMSO.

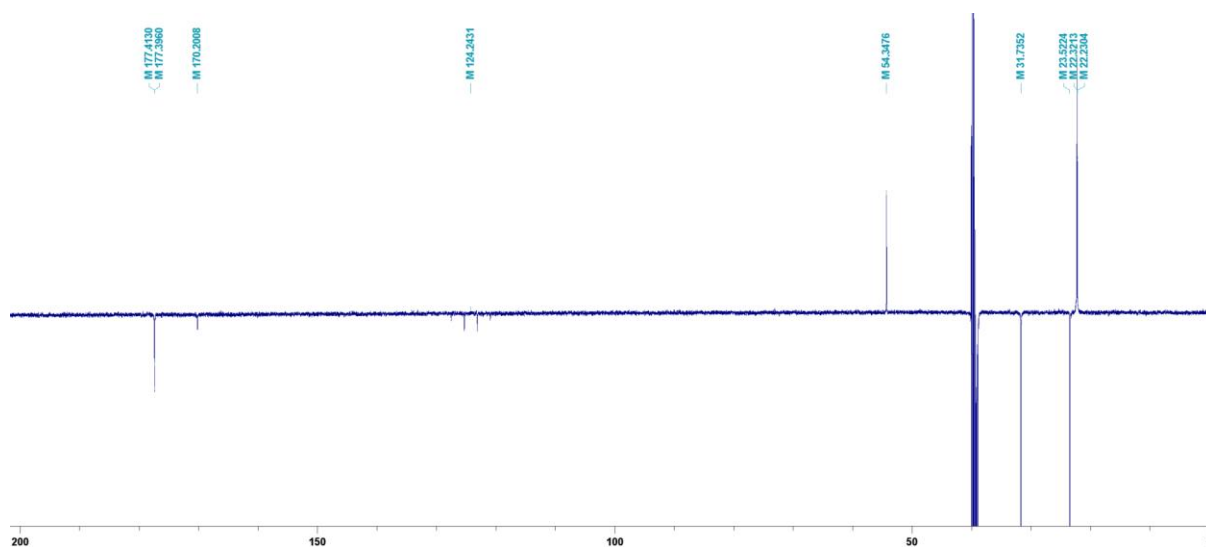

**Figure S61.** <sup>13</sup>C NMR spectrum of **13c** in d<sub>6</sub>-DMSO.

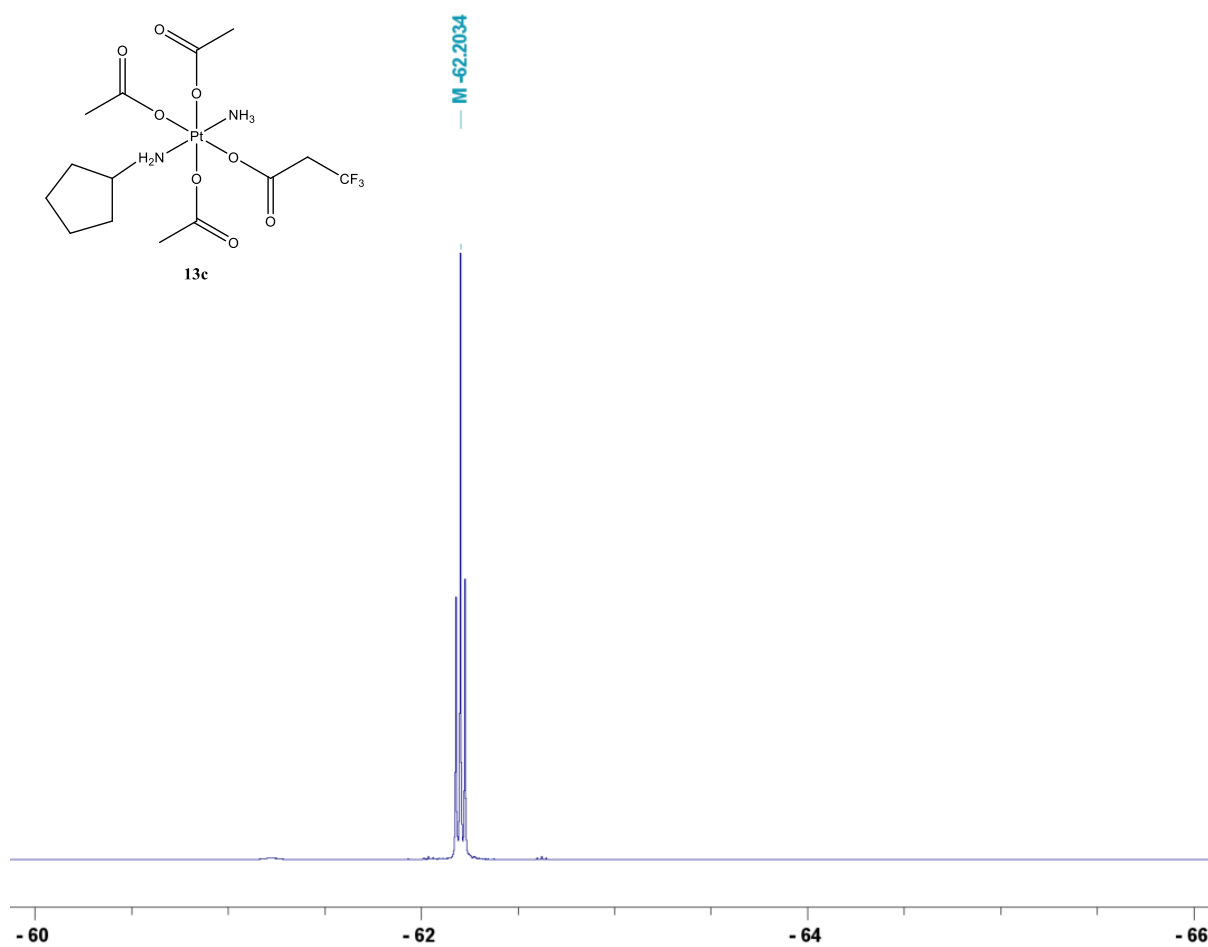

**Figure S62.** <sup>19</sup>F NMR spectrum of **13c** in d<sub>6</sub>-DMSO.

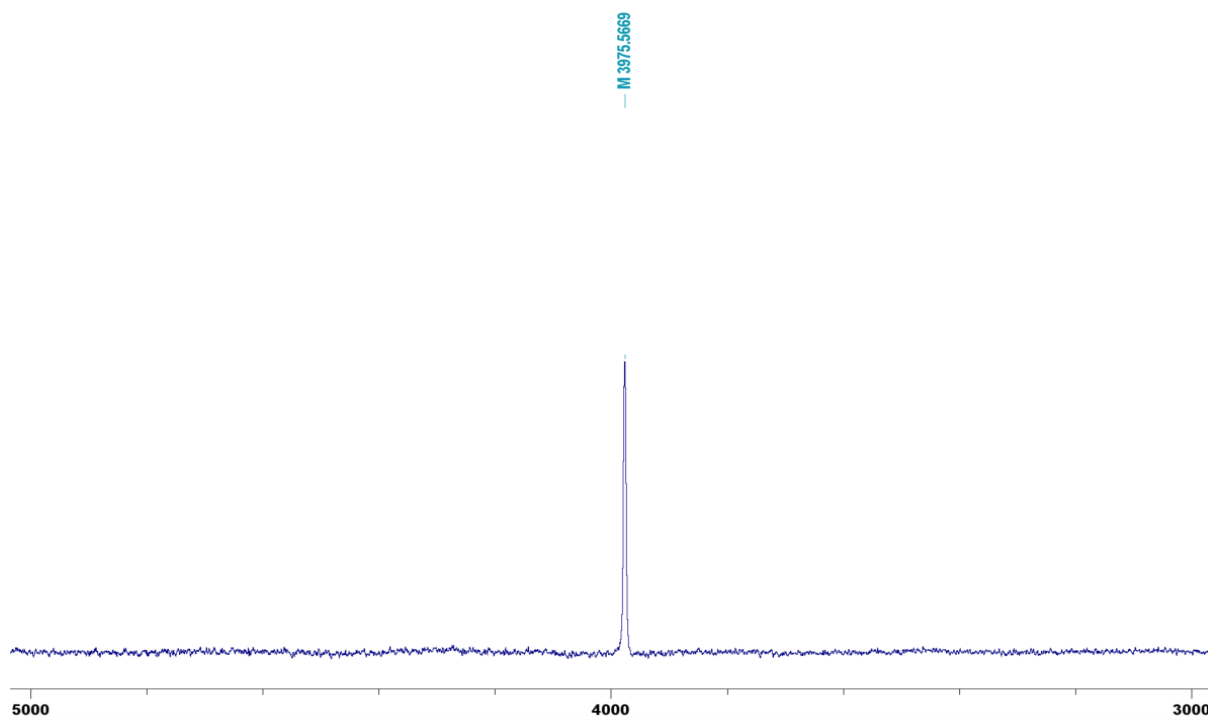

**Figure S63.** <sup>195</sup>Pt NMR spectrum of **13c** in d<sub>6</sub>-DMSO.

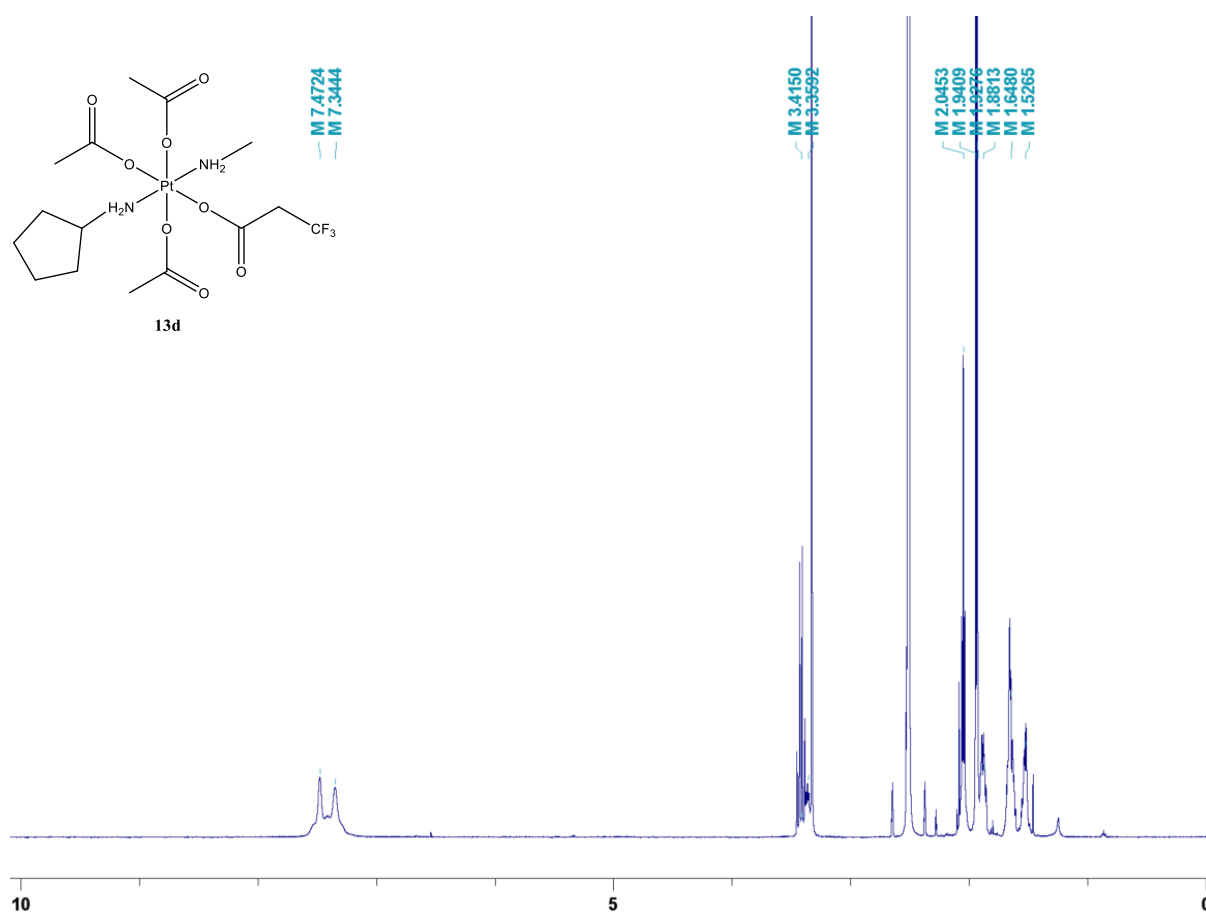

Figure S64.  $^1\text{H}$  NMR spectrum of **13d** in  $d_6$ -DMSO.

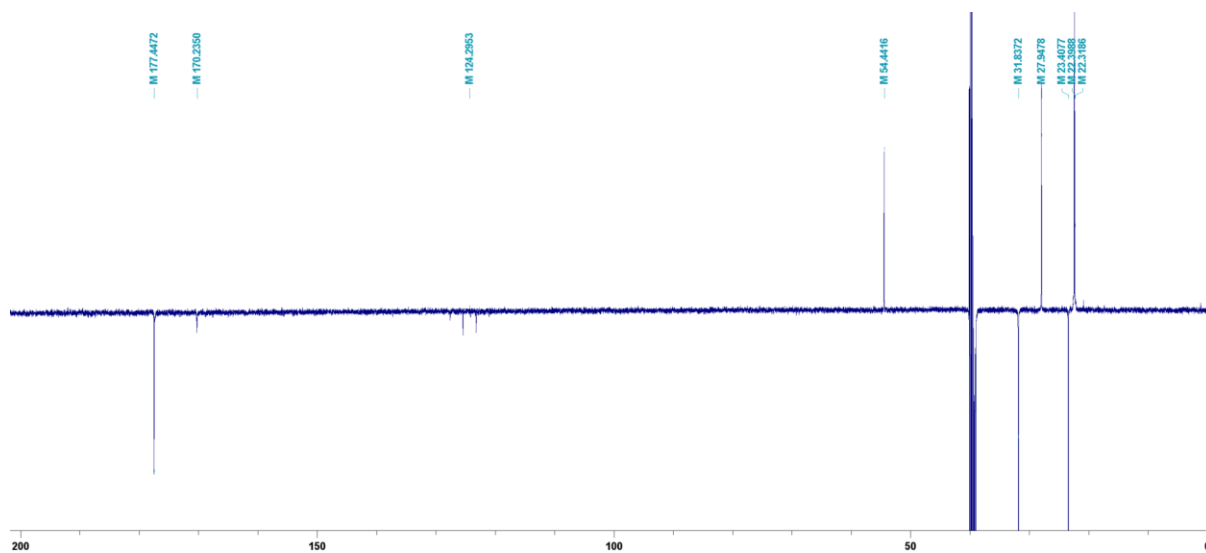

Figure S65.  $^{13}\text{C}$  NMR spectrum of **13d** in  $d_6$ -DMSO.

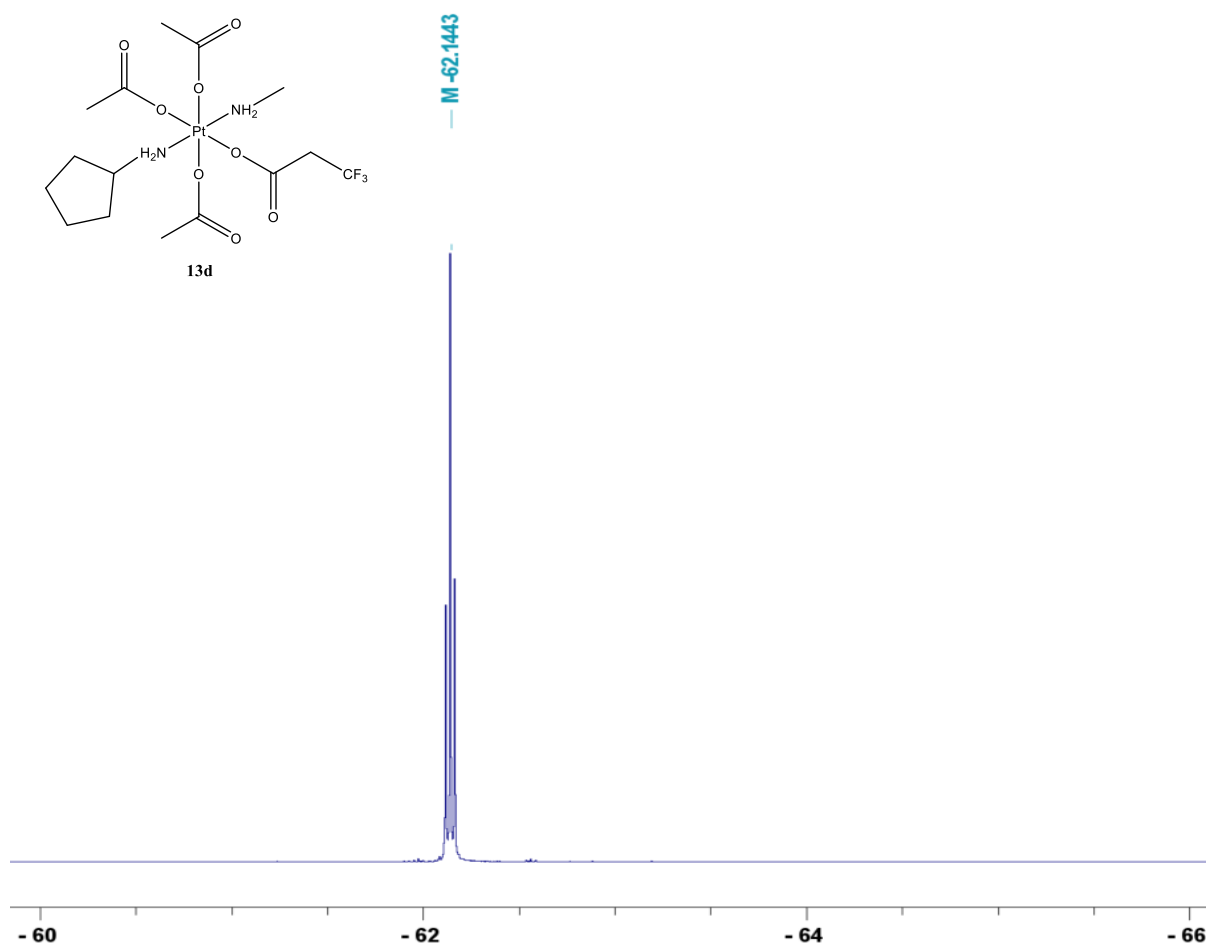

**Figure S66.**  $^{19}\text{F}$  NMR spectrum of **13d** in  $\text{d}_6$ -DMSO.

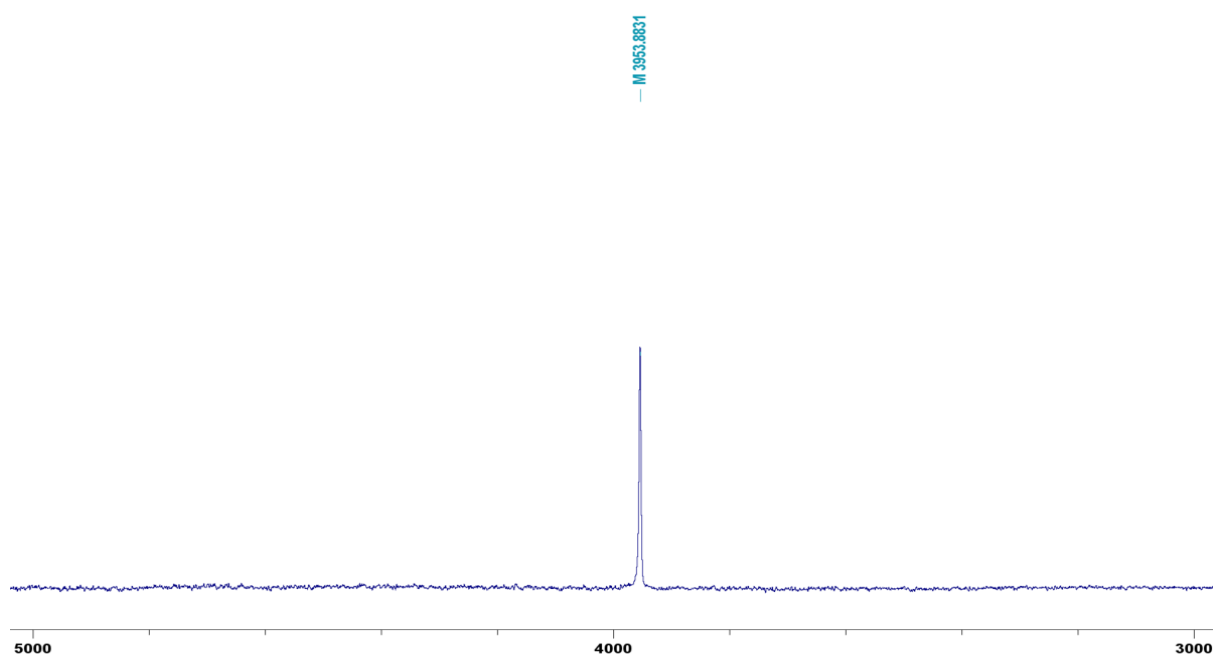

**Figure S67.**  $^{195}\text{Pt}$  NMR spectrum of **13d** in  $\text{d}_6$ -DMSO.

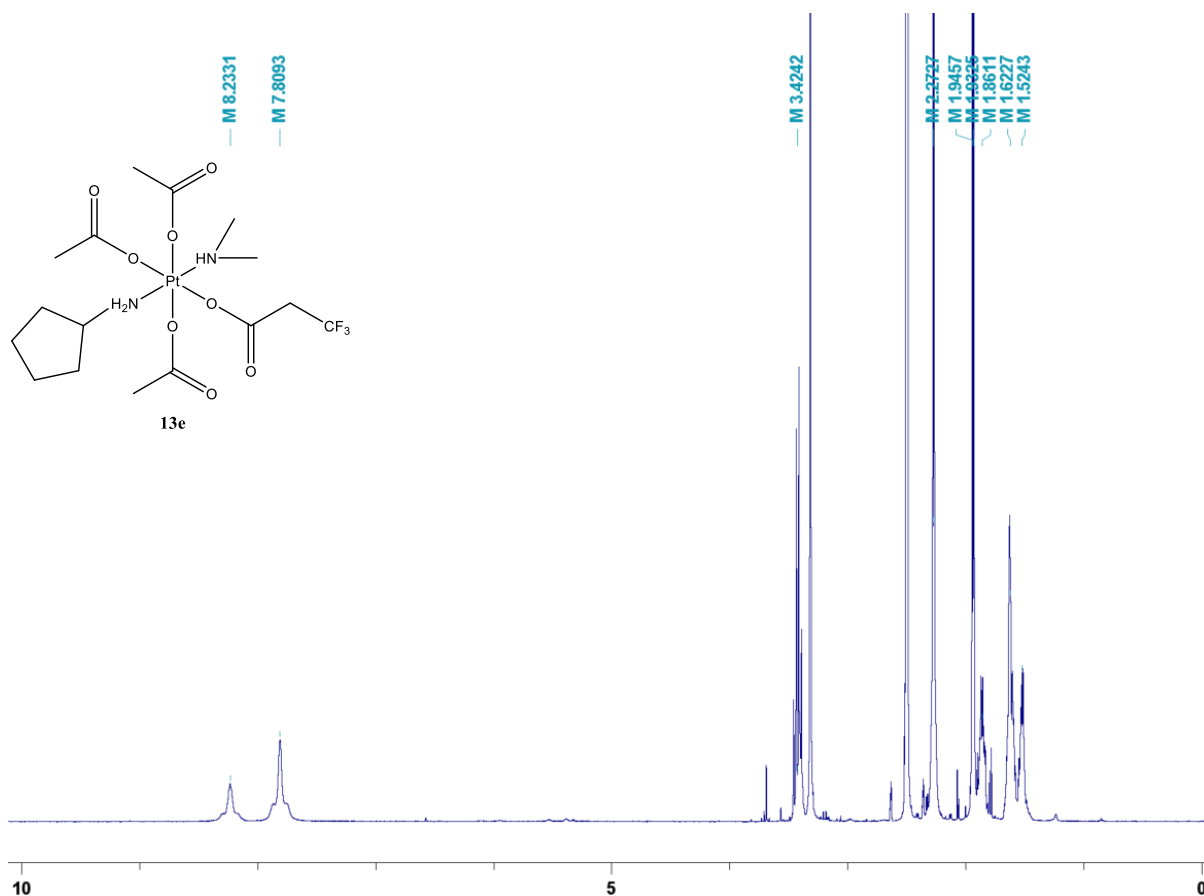

**Figure S68.** <sup>1</sup>H NMR spectrum of **13e** in d<sub>6</sub>-DMSO.

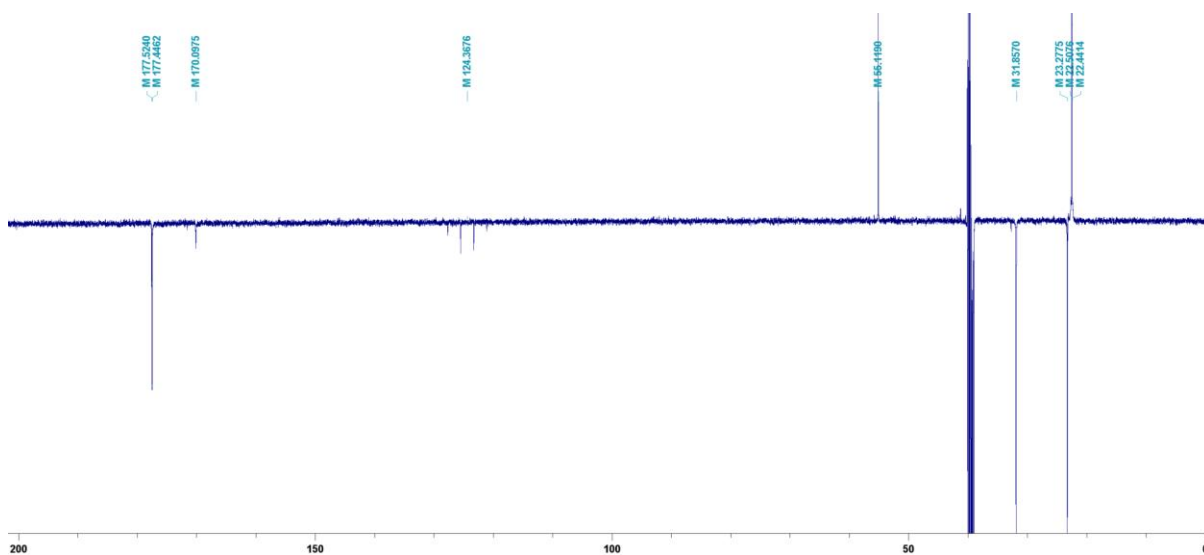

**Figure S69.** <sup>13</sup>C NMR spectrum of **13e** in d<sub>6</sub>-DMSO.

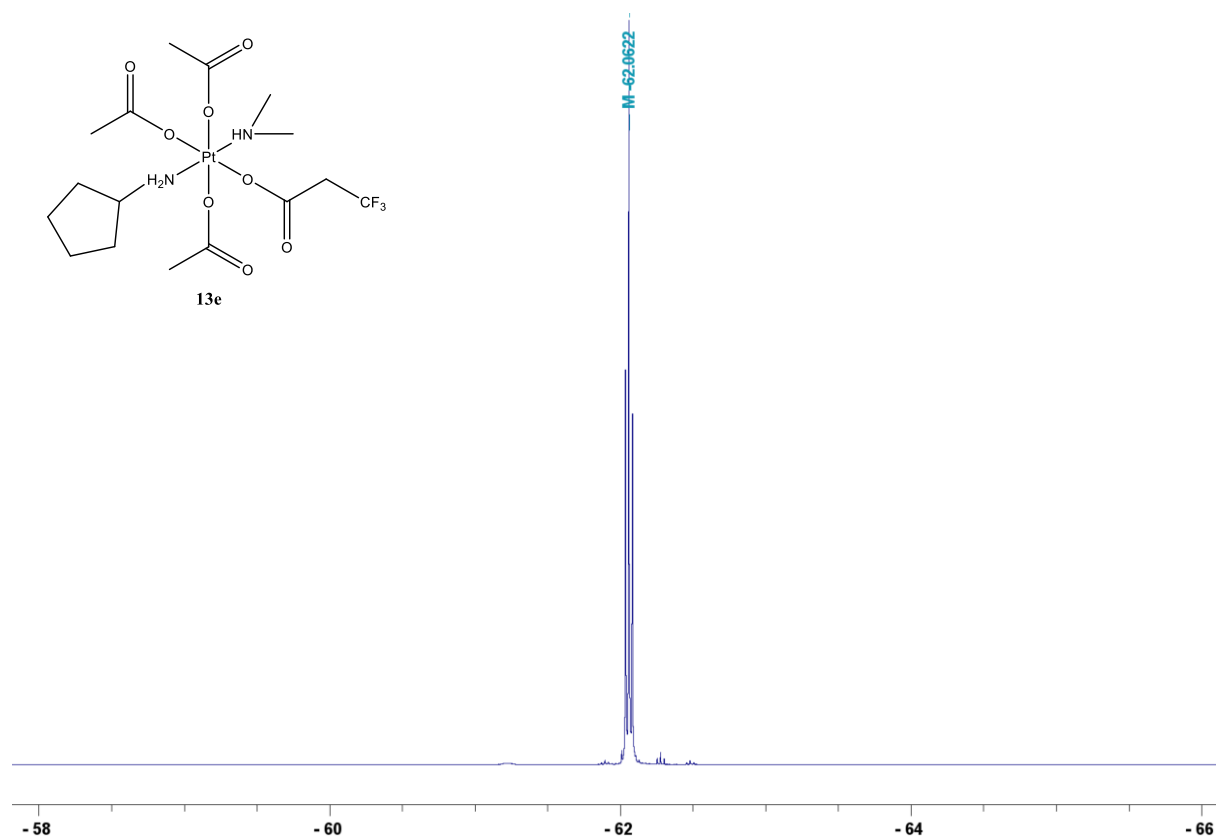

**Figure S70.**  $^{19}\text{F}$  NMR spectrum of **13e** in  $\text{d}_6$ -DMSO.

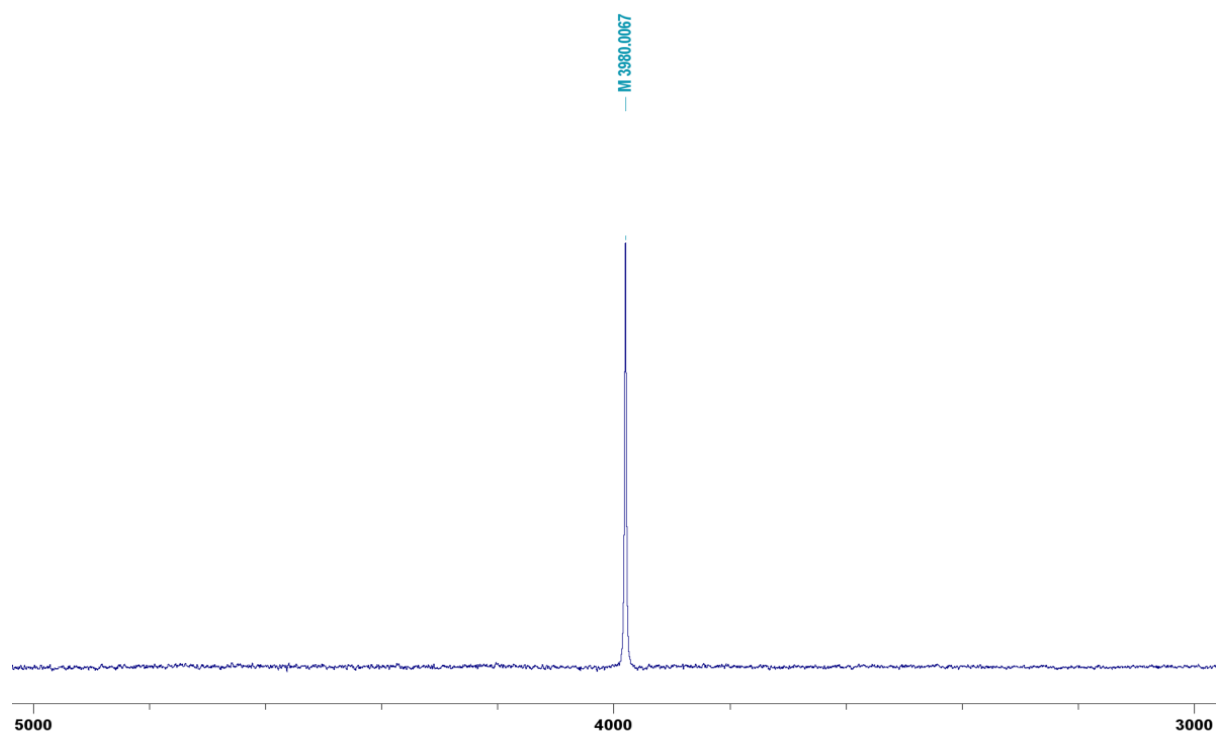

**Figure S71.**  $^{195}\text{Pt}$  NMR spectrum of **13e** in  $\text{d}_6$ -DMSO.

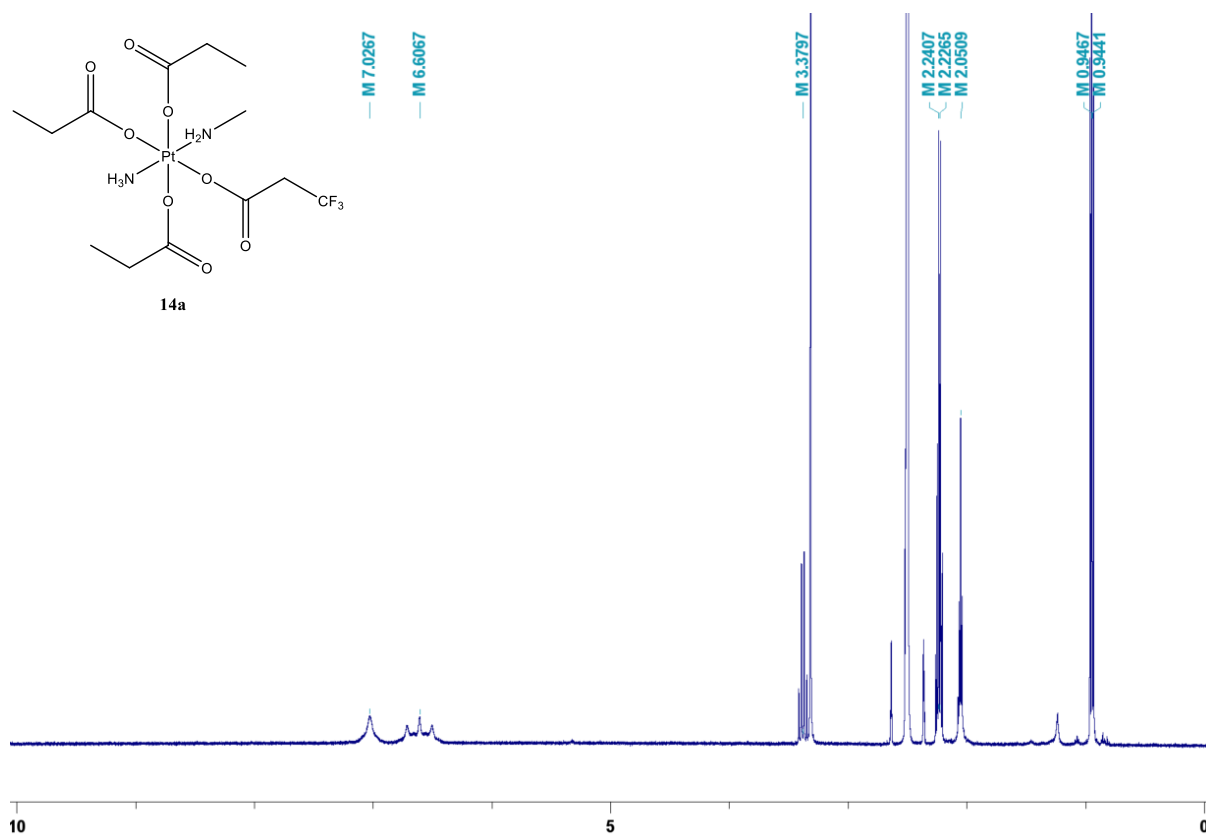

**Figure S72.** <sup>1</sup>H NMR spectrum of **14a** in d<sub>6</sub>-DMSO.

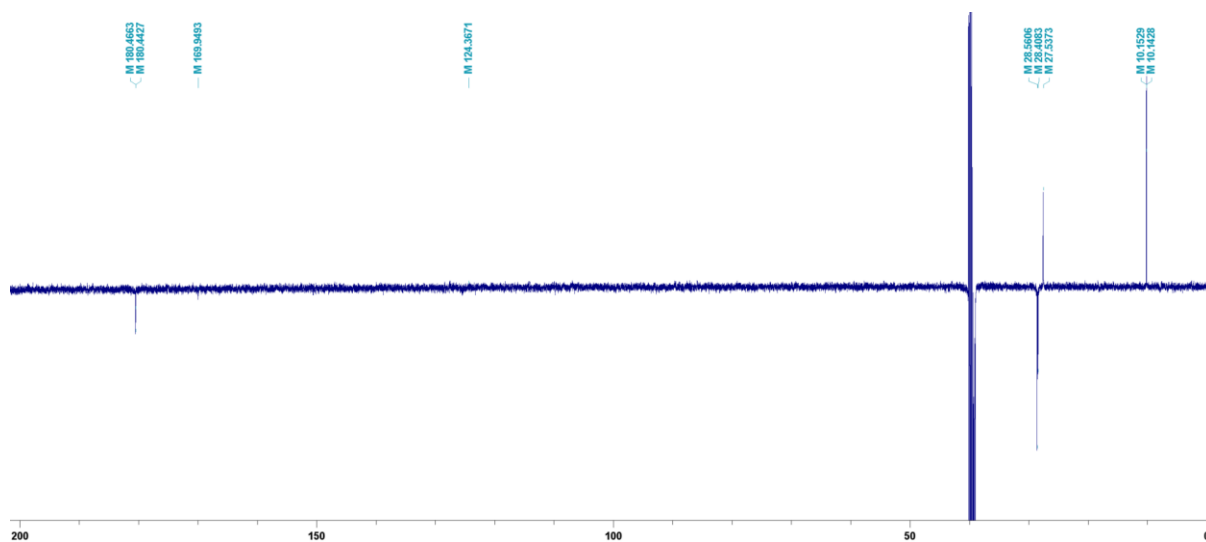

**Figure S73.** <sup>13</sup>C NMR spectrum of **14a** in d<sub>6</sub>-DMSO.

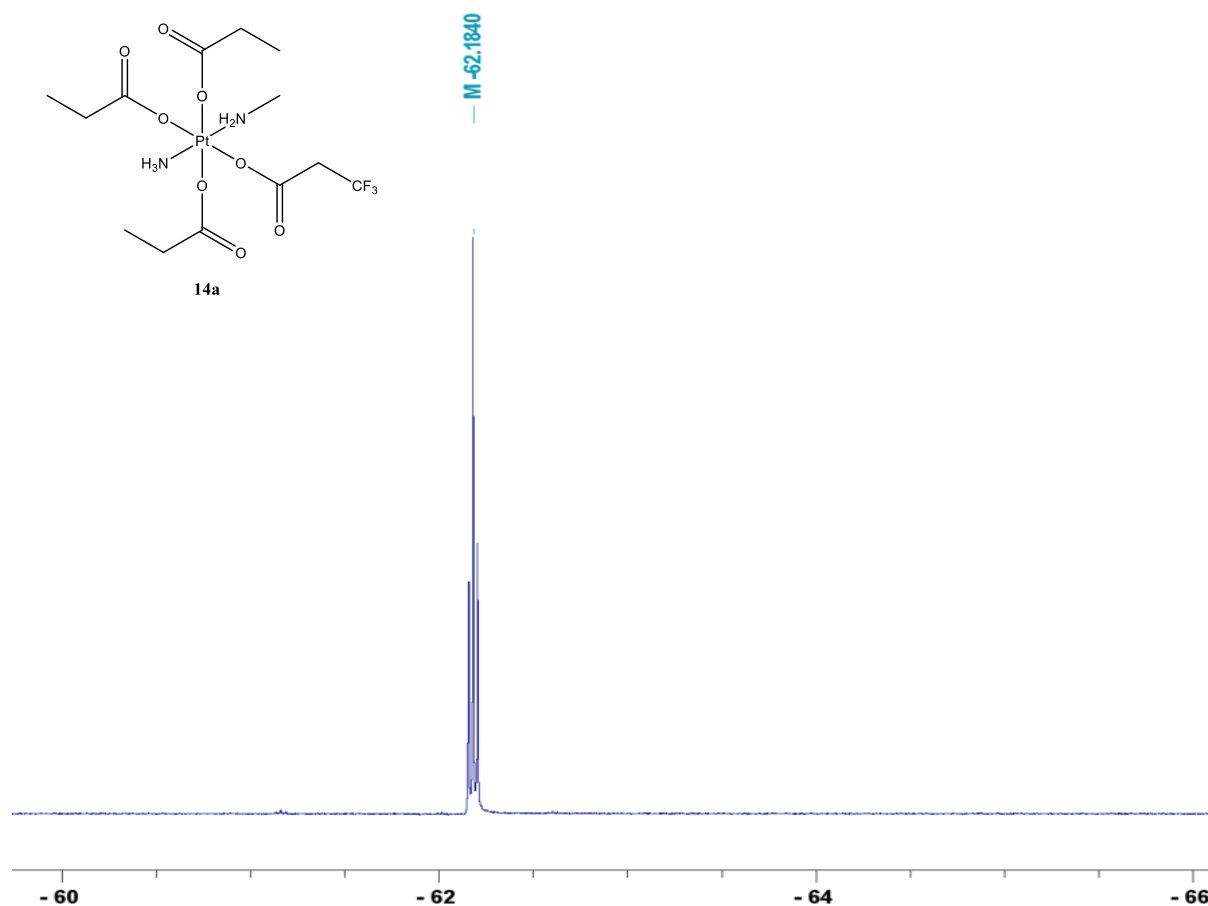

**Figure S74.** <sup>19</sup>F NMR spectrum of **14a** in d<sub>6</sub>-DMSO.

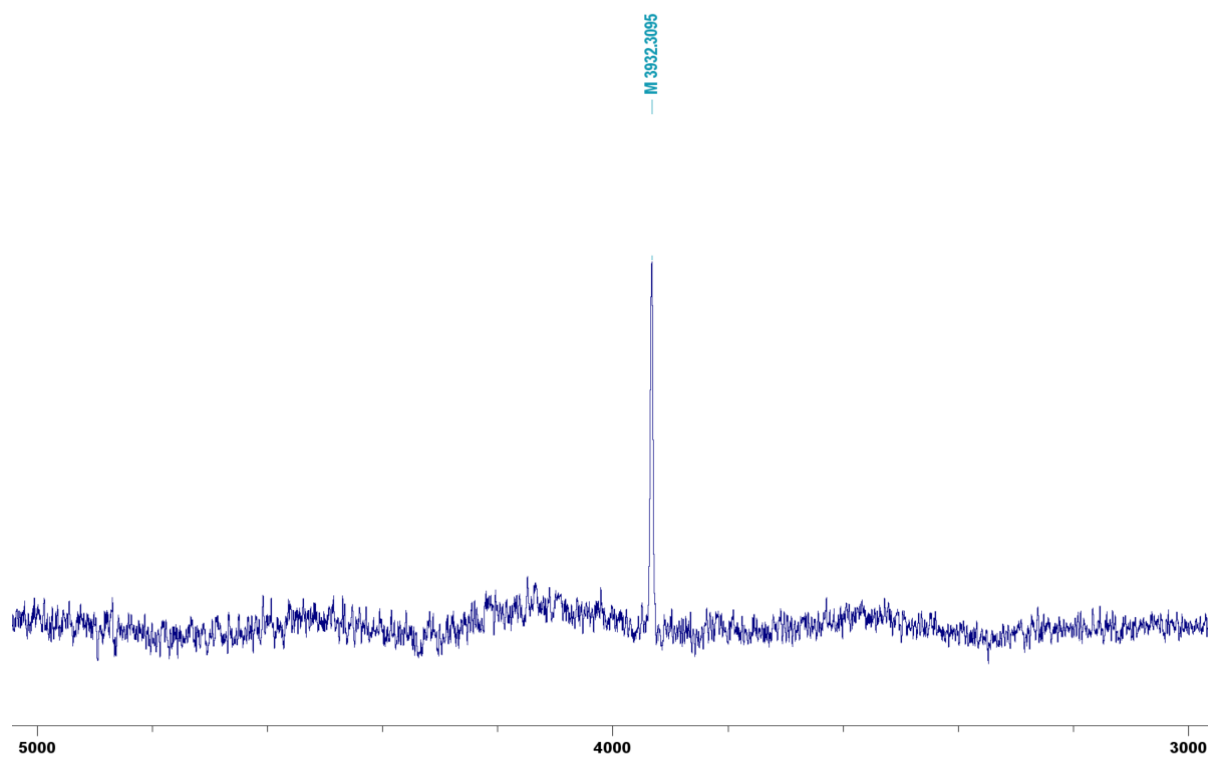

**Figure S75.** <sup>195</sup>Pt NMR spectrum of **14a** in d<sub>6</sub>-DMSO.



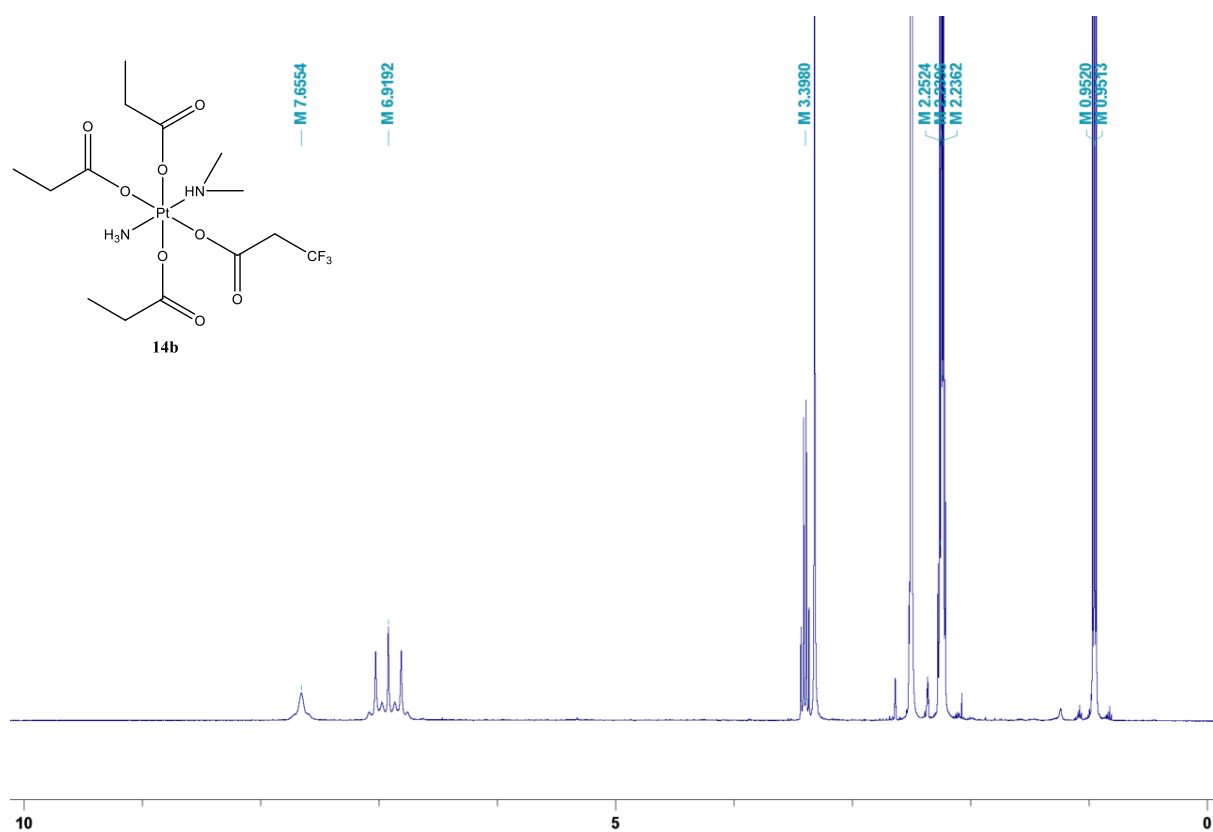

**Figure S76.** <sup>1</sup>H NMR spectrum of **14b** in d<sub>6</sub>-DMSO.

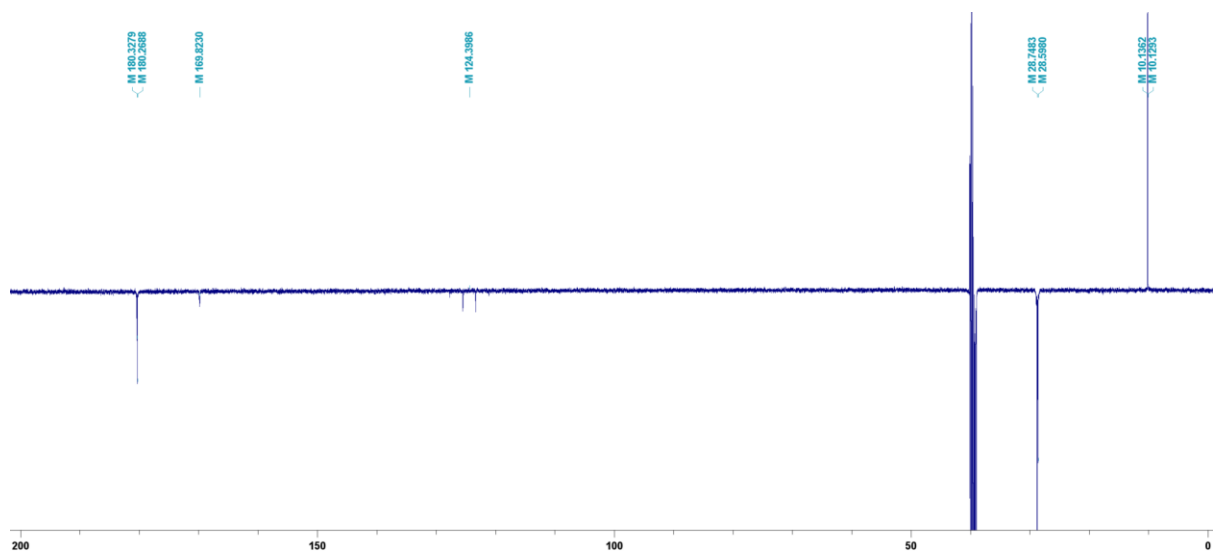

**Figure S77.** <sup>13</sup>C NMR spectrum of **14b** in d<sub>6</sub>-DMSO.

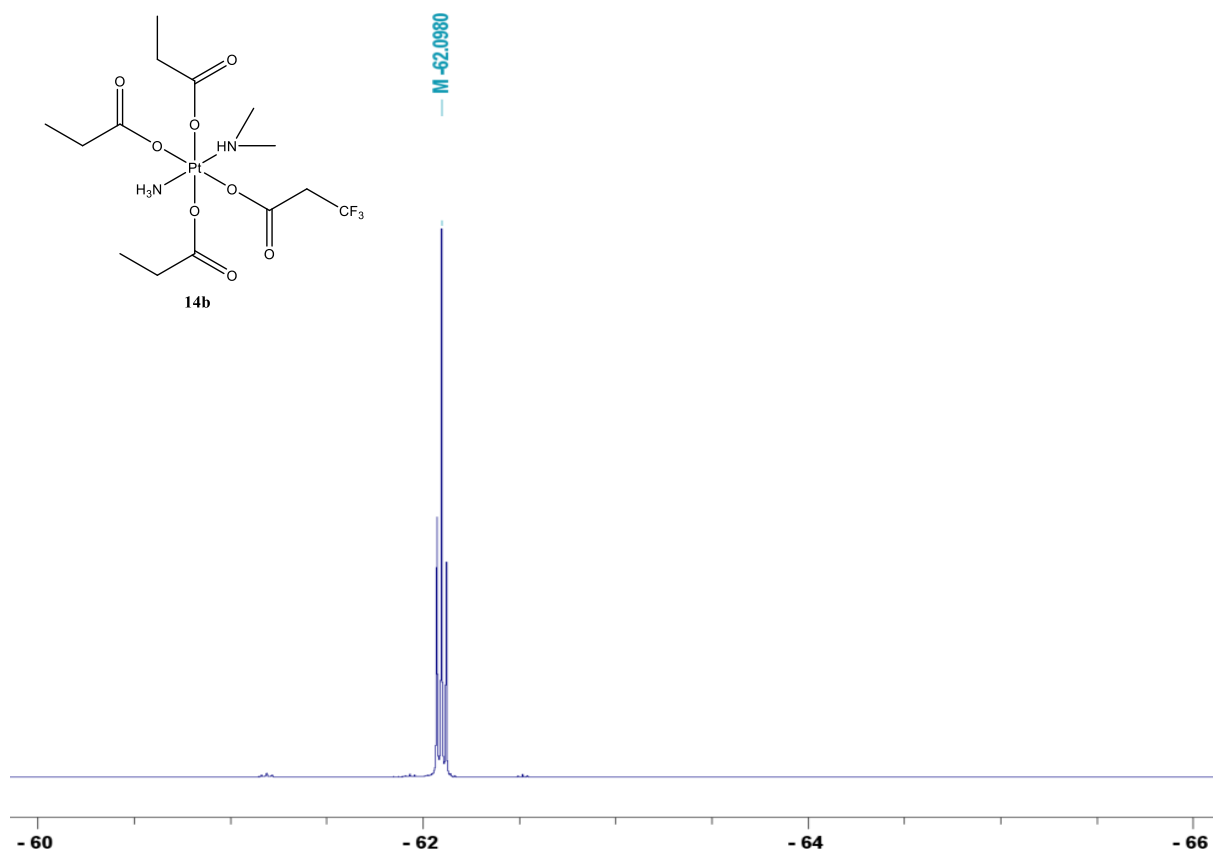

**Figure S78.** <sup>19</sup>F NMR spectrum of **14b** in d<sub>6</sub>-DMSO.

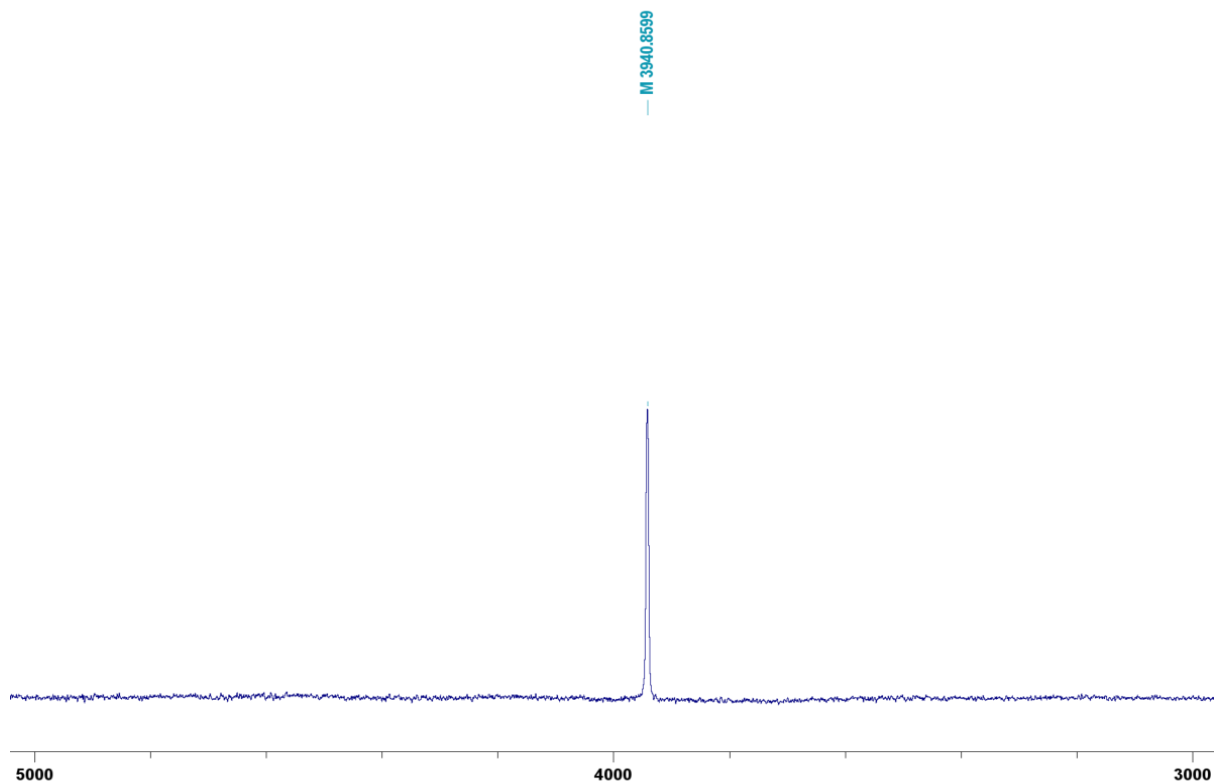

**Figure S79.** <sup>195</sup>Pt NMR spectrum of **14b** in d<sub>6</sub>-DMSO.

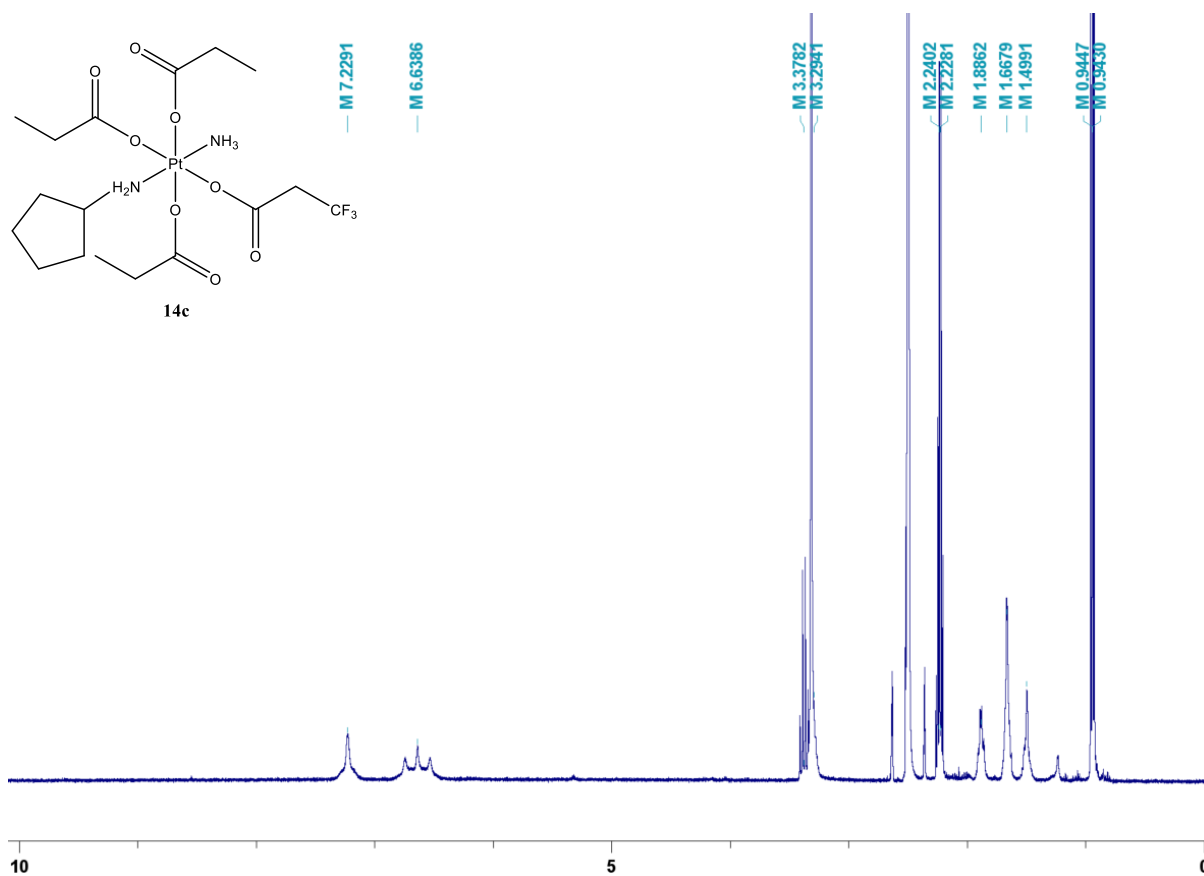

**Figure S80.** <sup>1</sup>H NMR spectrum of **14c** in d<sub>6</sub>-DMSO.

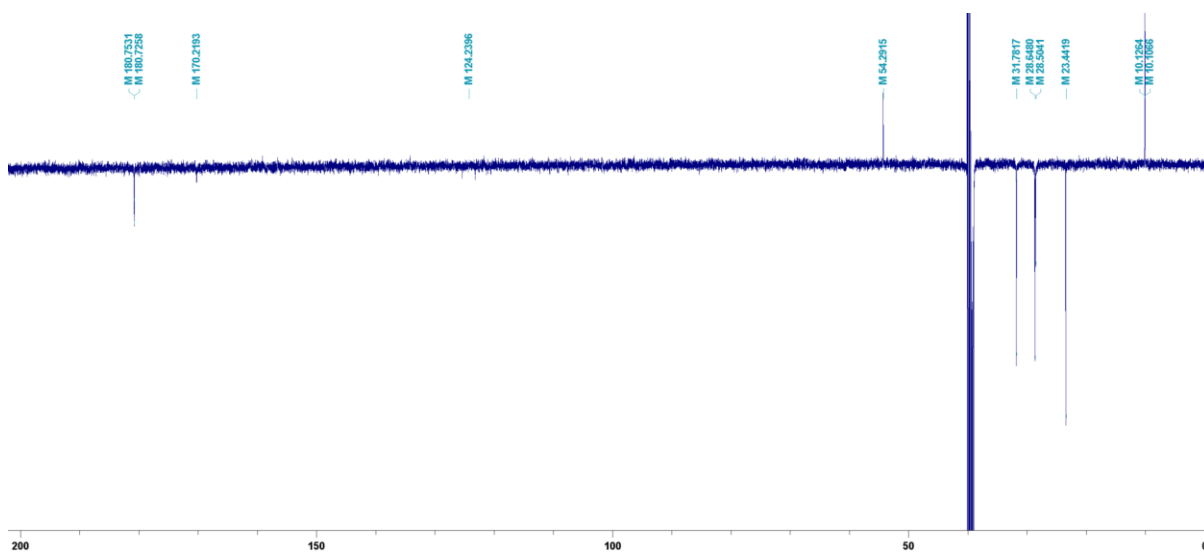

**Figure S81.** <sup>13</sup>C NMR spectrum of **14c** in d<sub>6</sub>-DMSO.

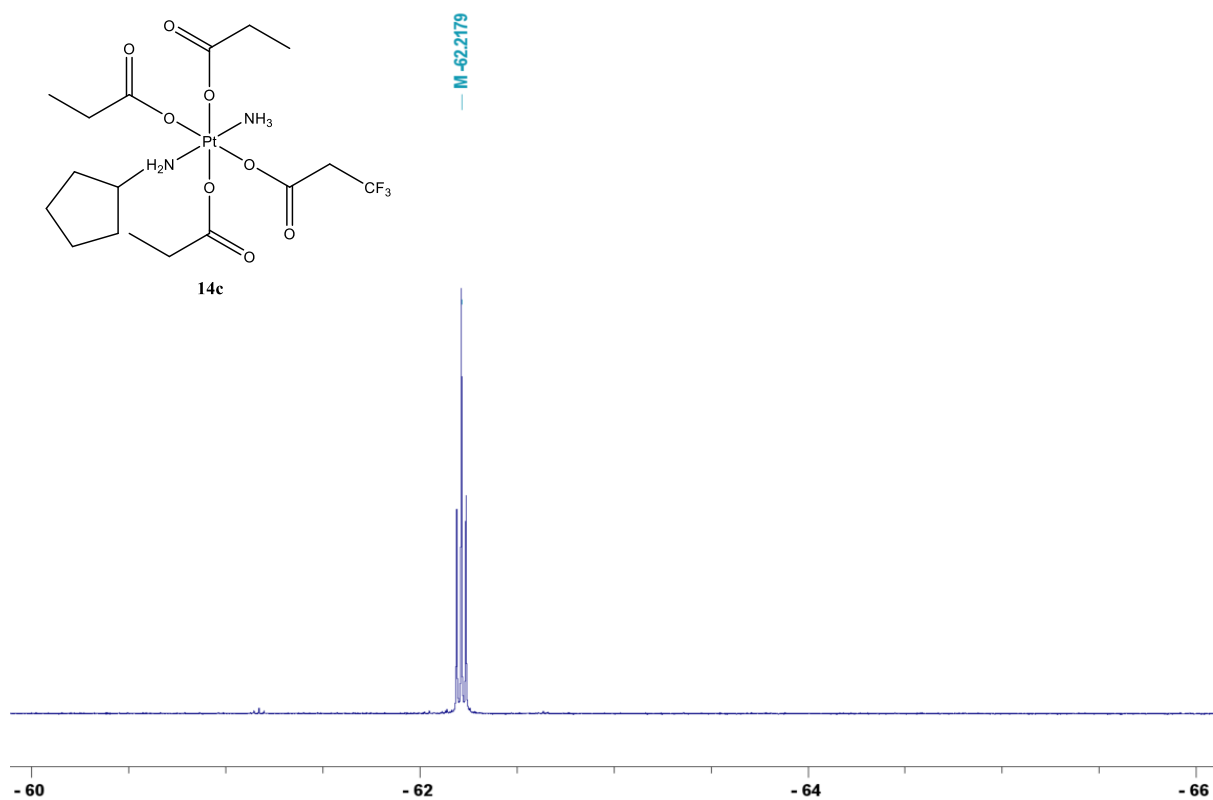

**Figure S82.** <sup>19</sup>F NMR spectrum of **14c** in d<sub>6</sub>-DMSO.

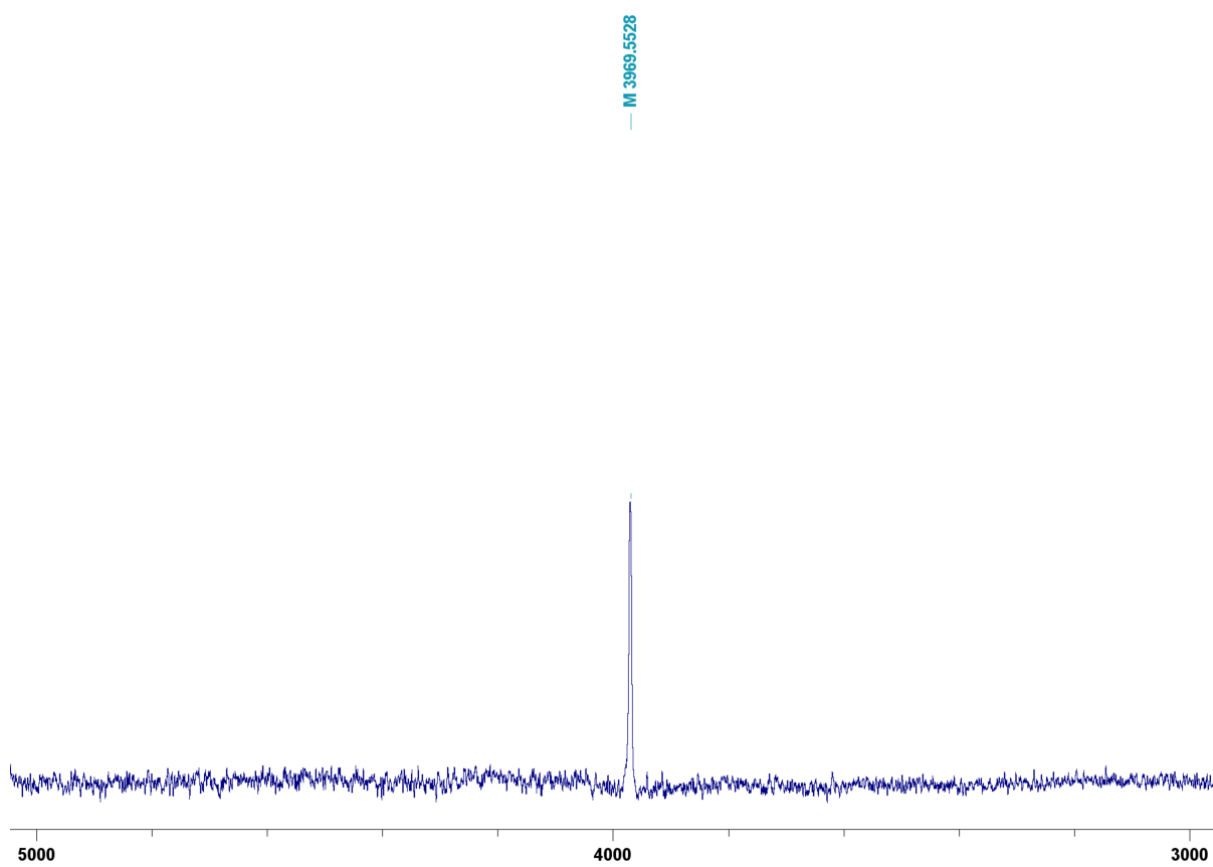

**Figure S83.** <sup>195</sup>Pt NMR spectrum of **14c** in d<sub>6</sub>-DMSO.

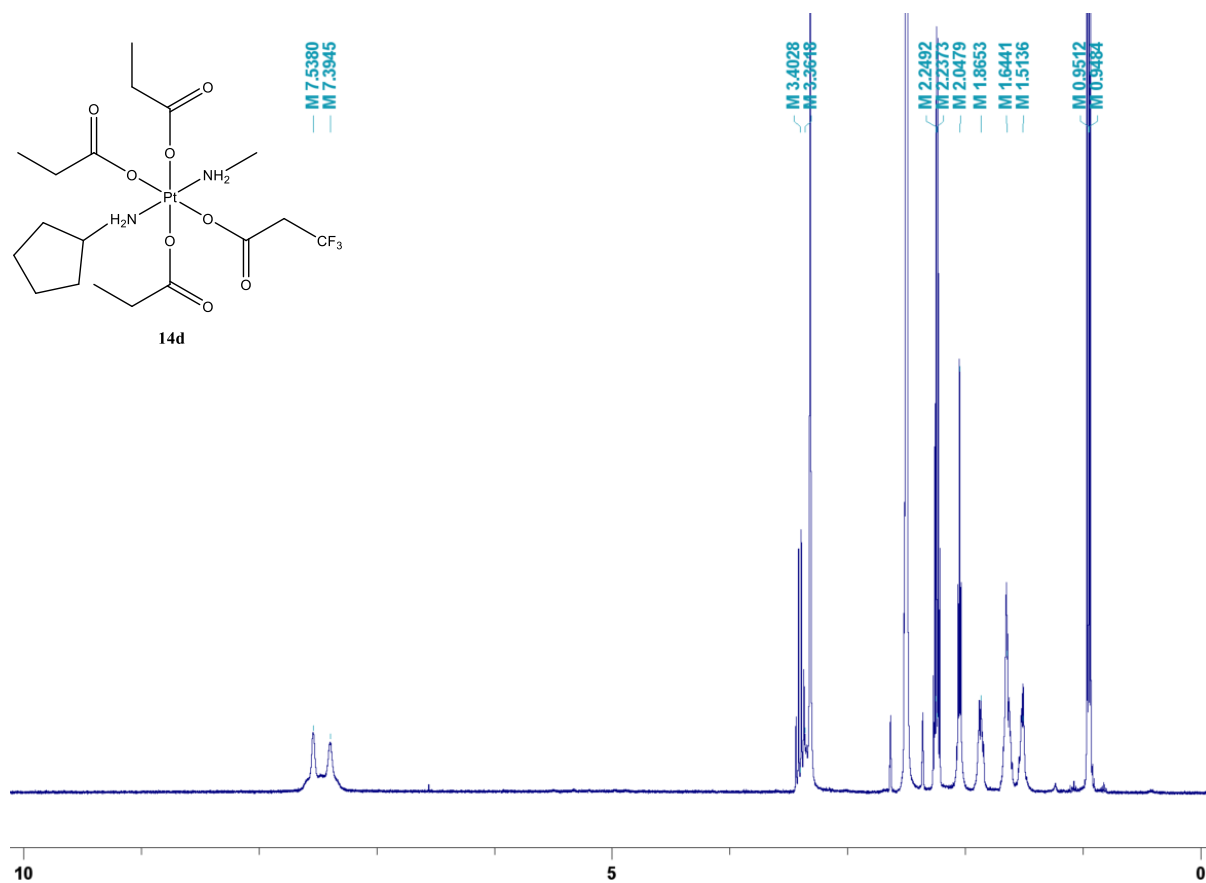

**Figure S84.** <sup>1</sup>H NMR spectrum of **14d** in d<sub>6</sub>-DMSO.

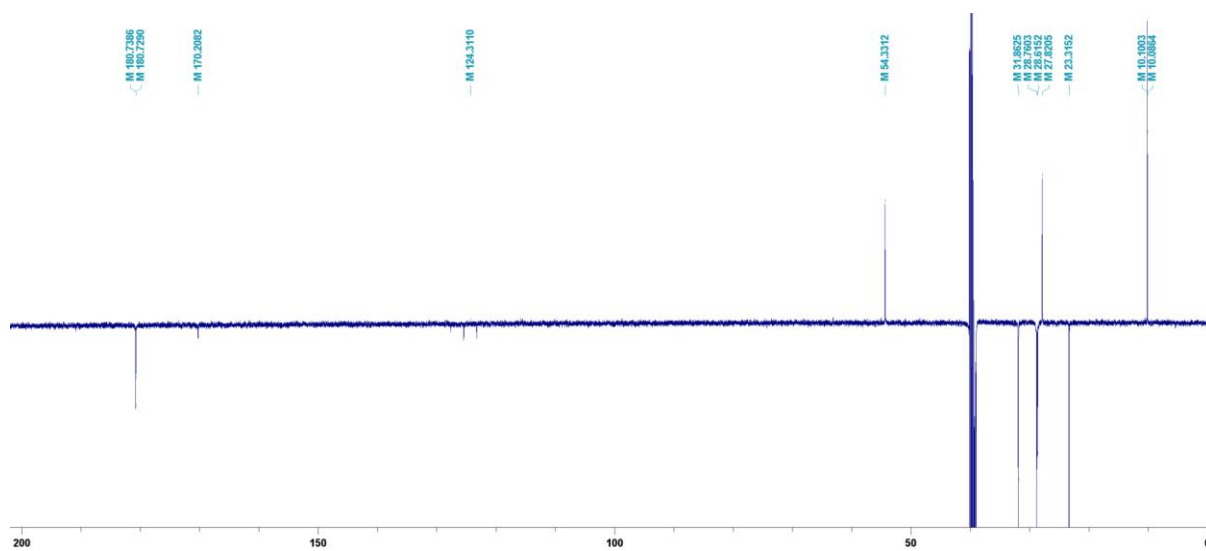

**Figure S85.** <sup>13</sup>C NMR spectrum of **14d** in d<sub>6</sub>-DMSO.

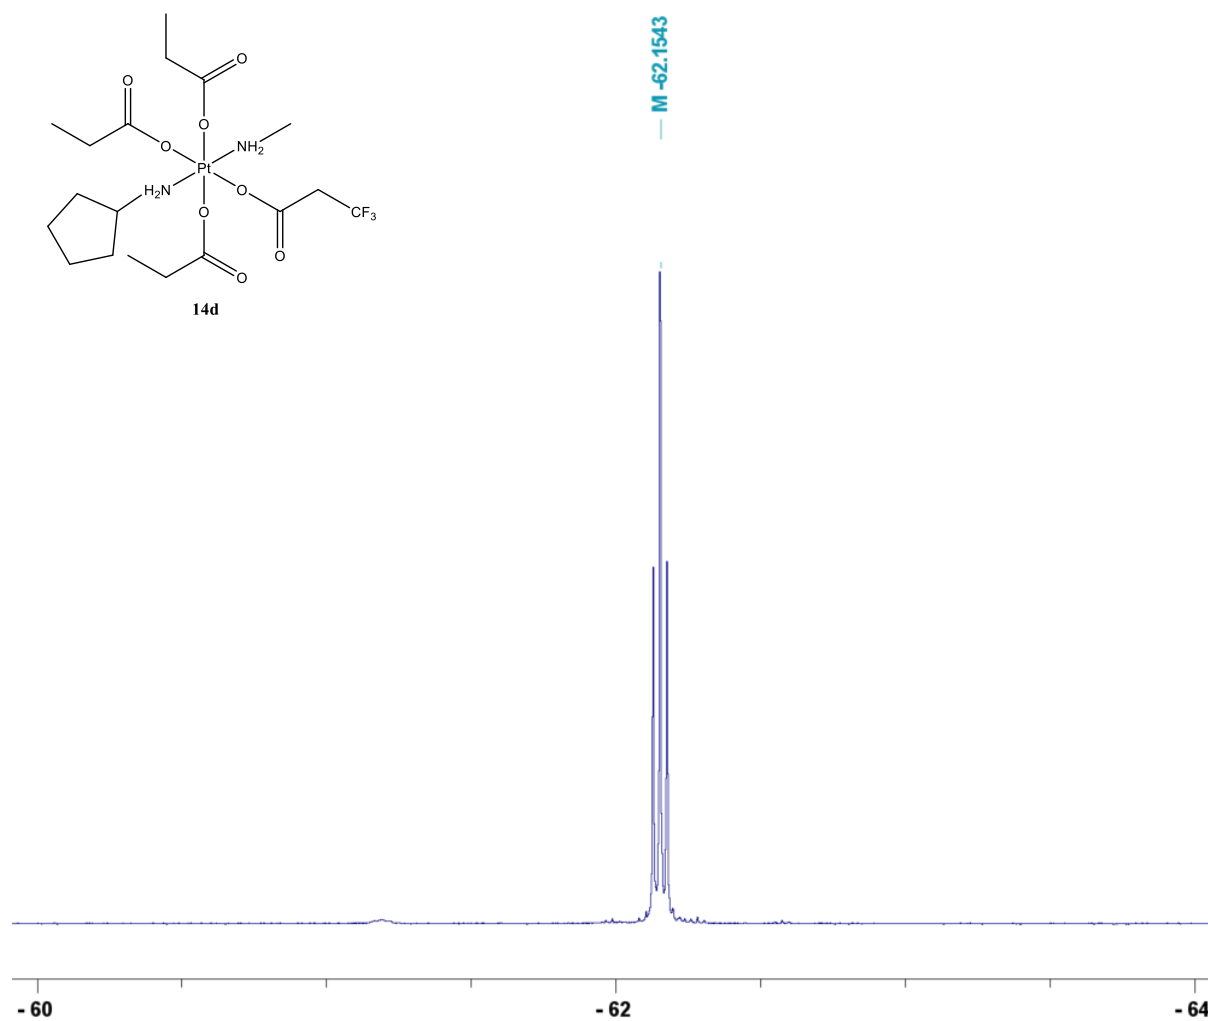

**Figure S86.**  $^{19}\text{F}$  NMR spectrum of **14d** in  $\text{d}_6$ -DMSO.

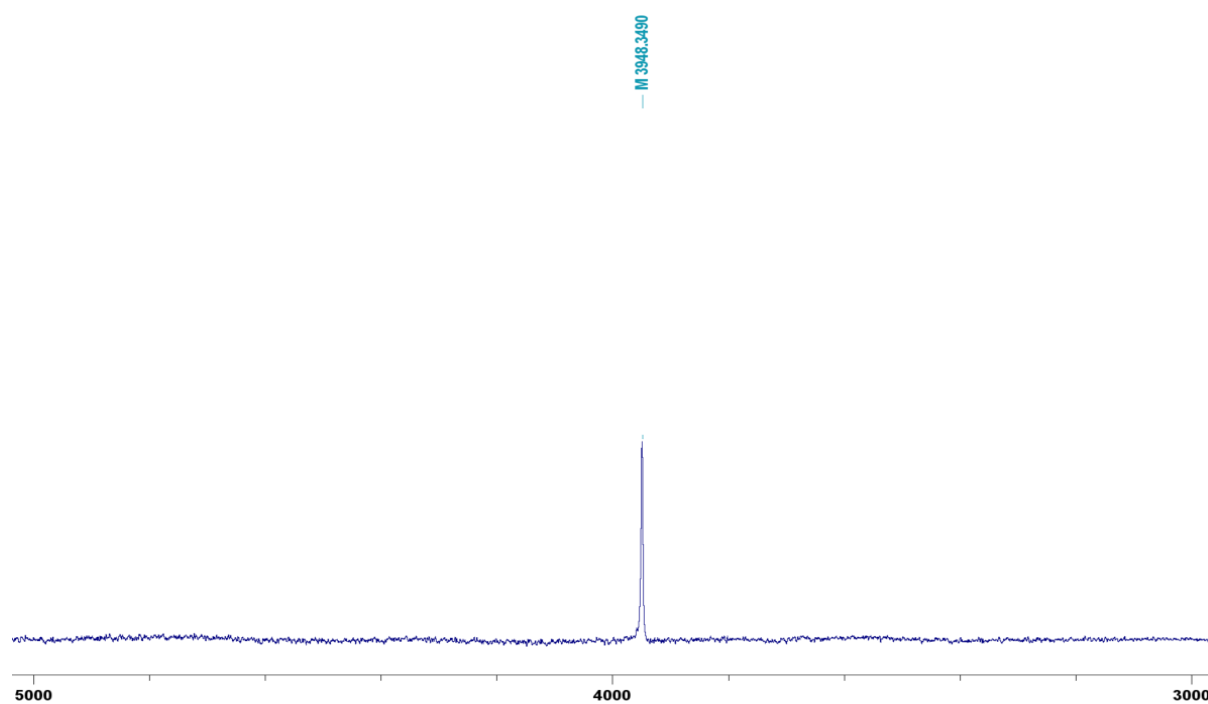

**Figure S87.**  $^{195}\text{Pt}$  NMR spectrum of **14d** in  $\text{d}_6$ -DMSO.

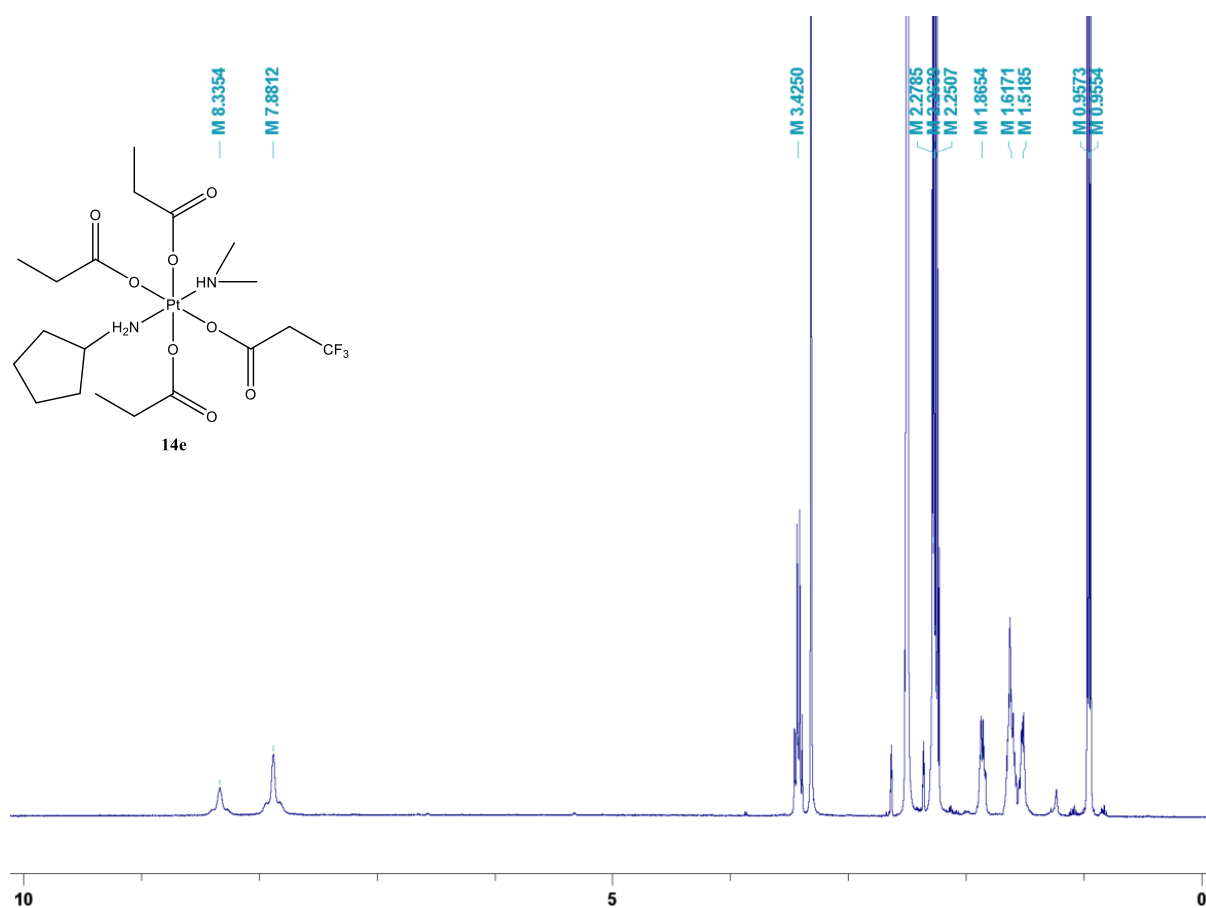

**Figure S88.**  $^1\text{H}$  NMR spectrum of **14e** in  $\text{d}_6$ -DMSO.

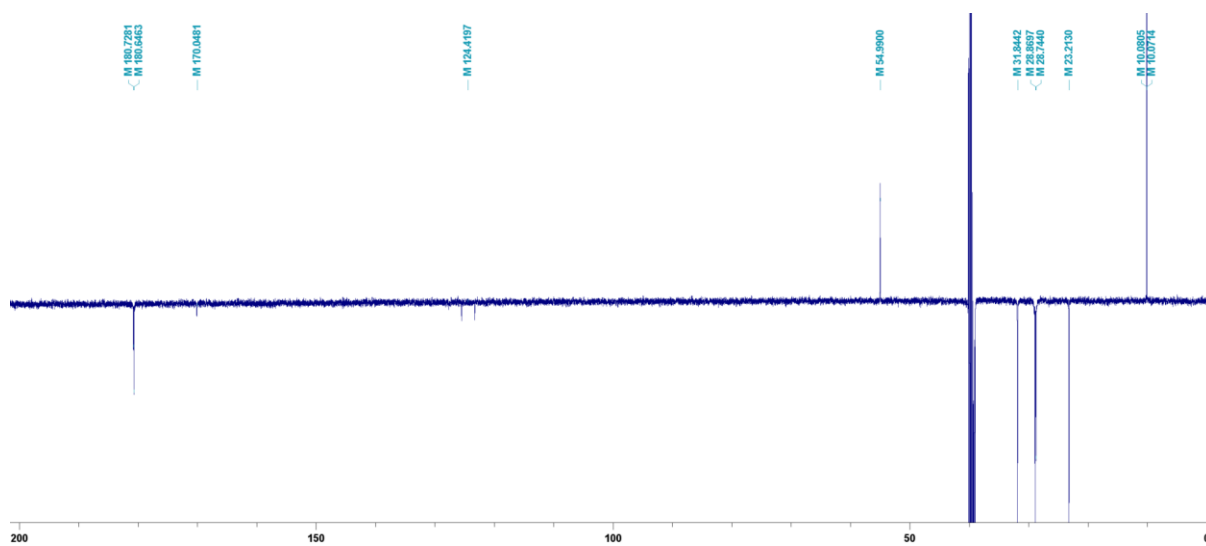

**Figure S89.**  $^{13}\text{C}$  NMR spectrum of **14e** in  $\text{d}_6$ -DMSO.

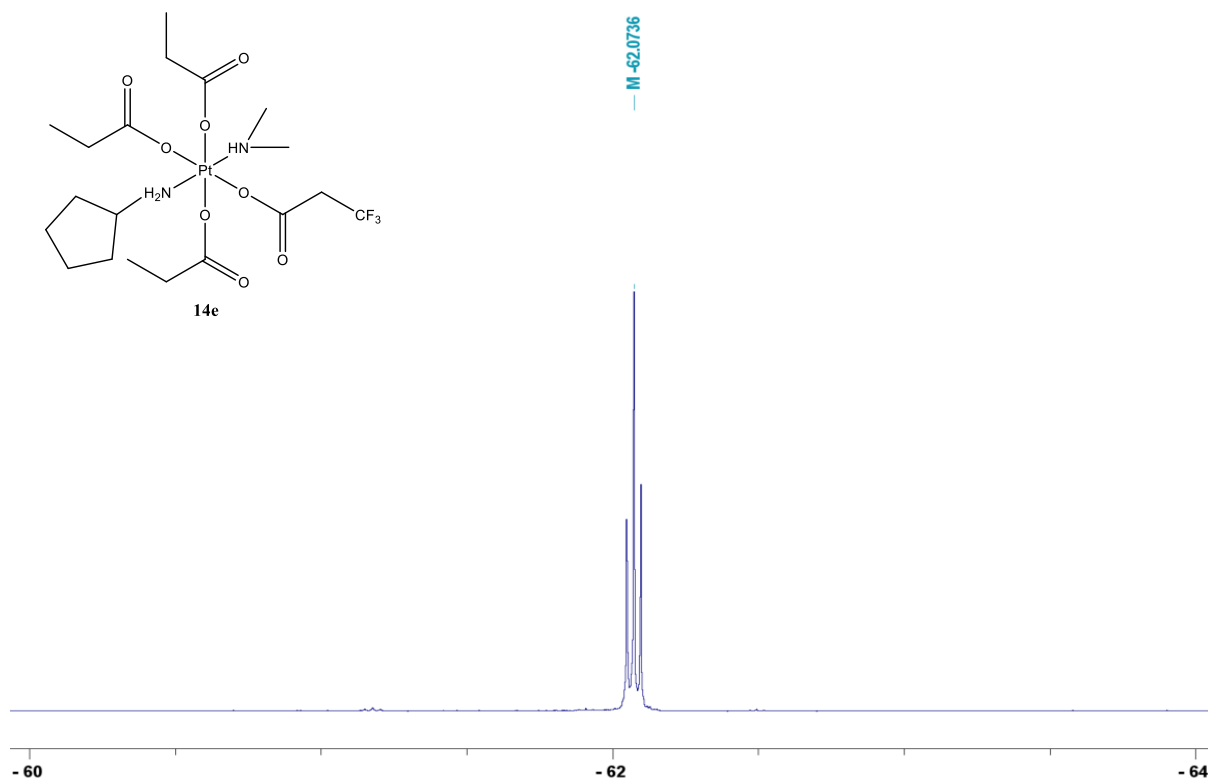

**Figure S90.**  $^{19}\text{F}$  NMR spectrum of **14e** in  $\text{d}_6$ -DMSO.

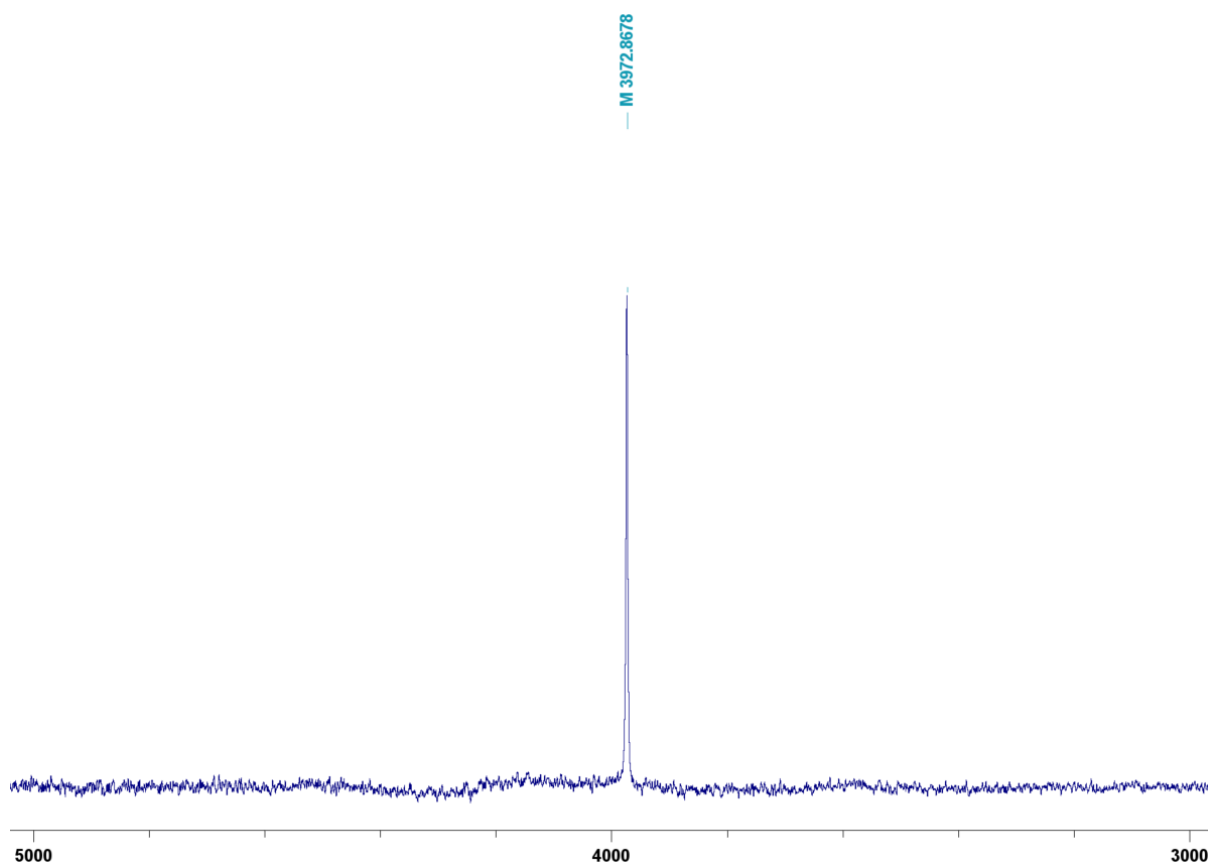

**Figure S91.**  $^{195}\text{Pt}$  NMR spectrum of **14e** in  $\text{d}_6$ -DMSO.



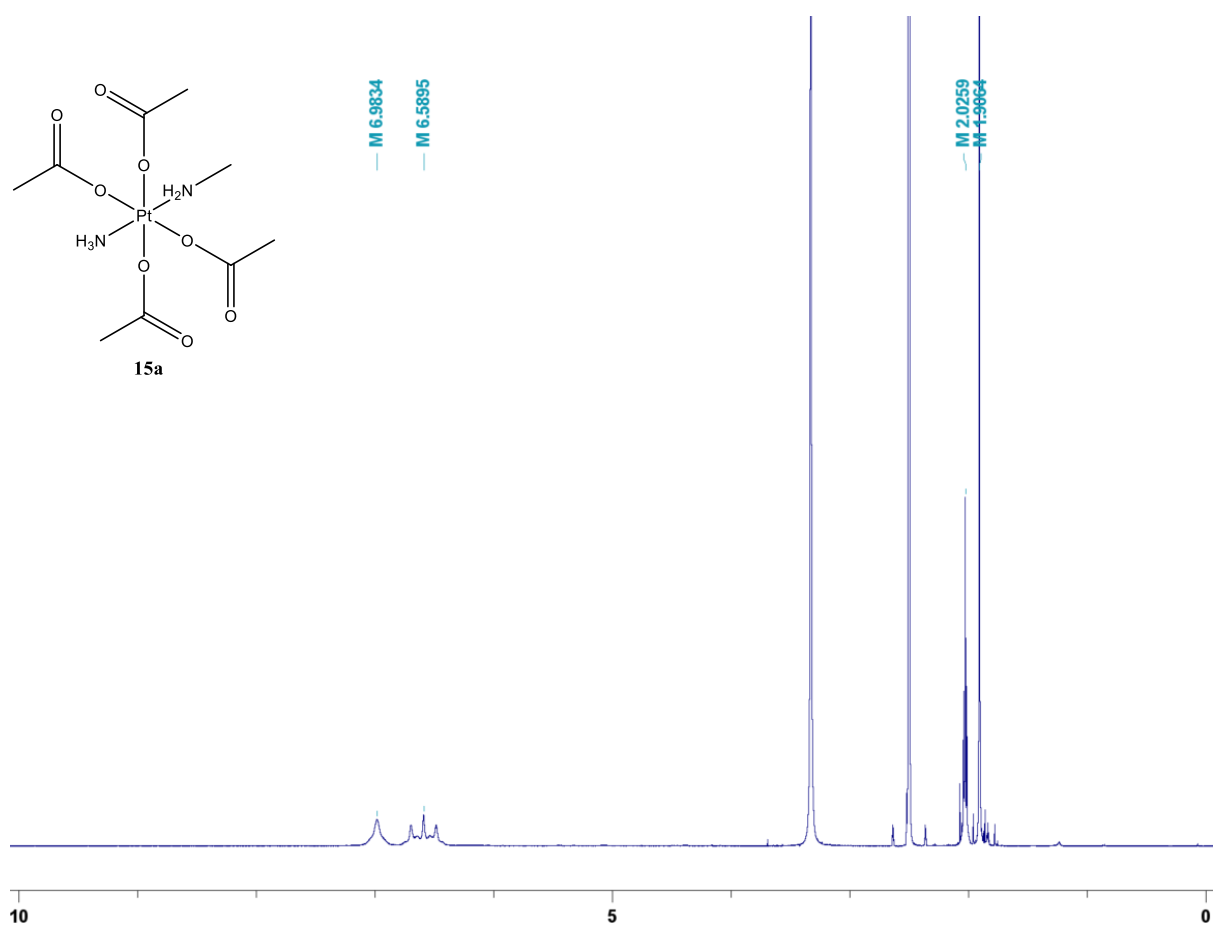

**Figure S92.** <sup>1</sup>H NMR spectrum of **15a** in d<sub>6</sub>-DMSO.

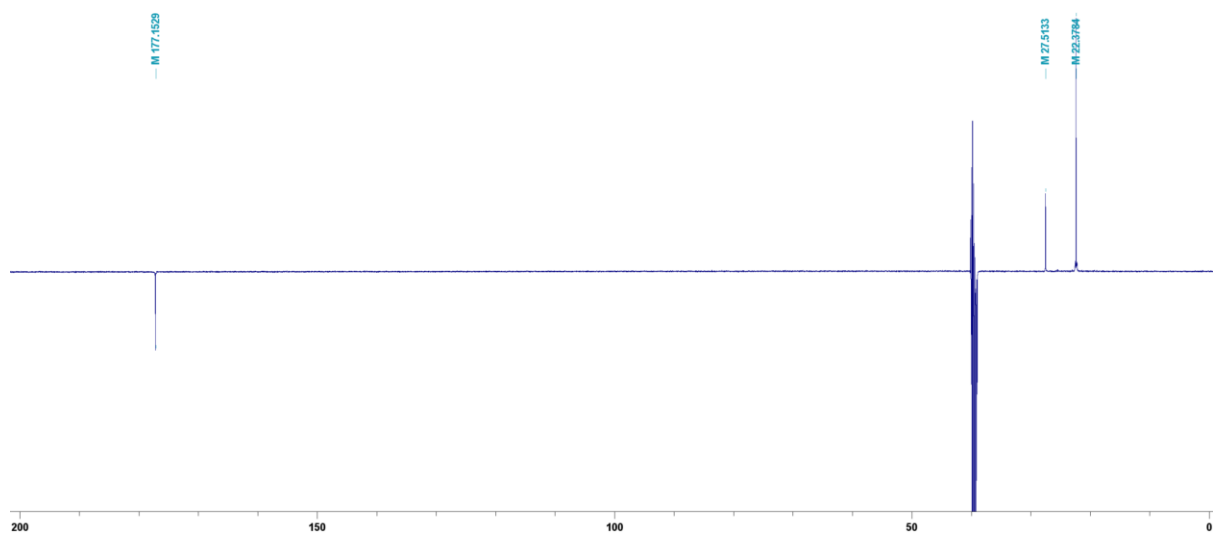

**Figure S93.** <sup>13</sup>C NMR spectrum of **15a** in d<sub>6</sub>-DMSO.

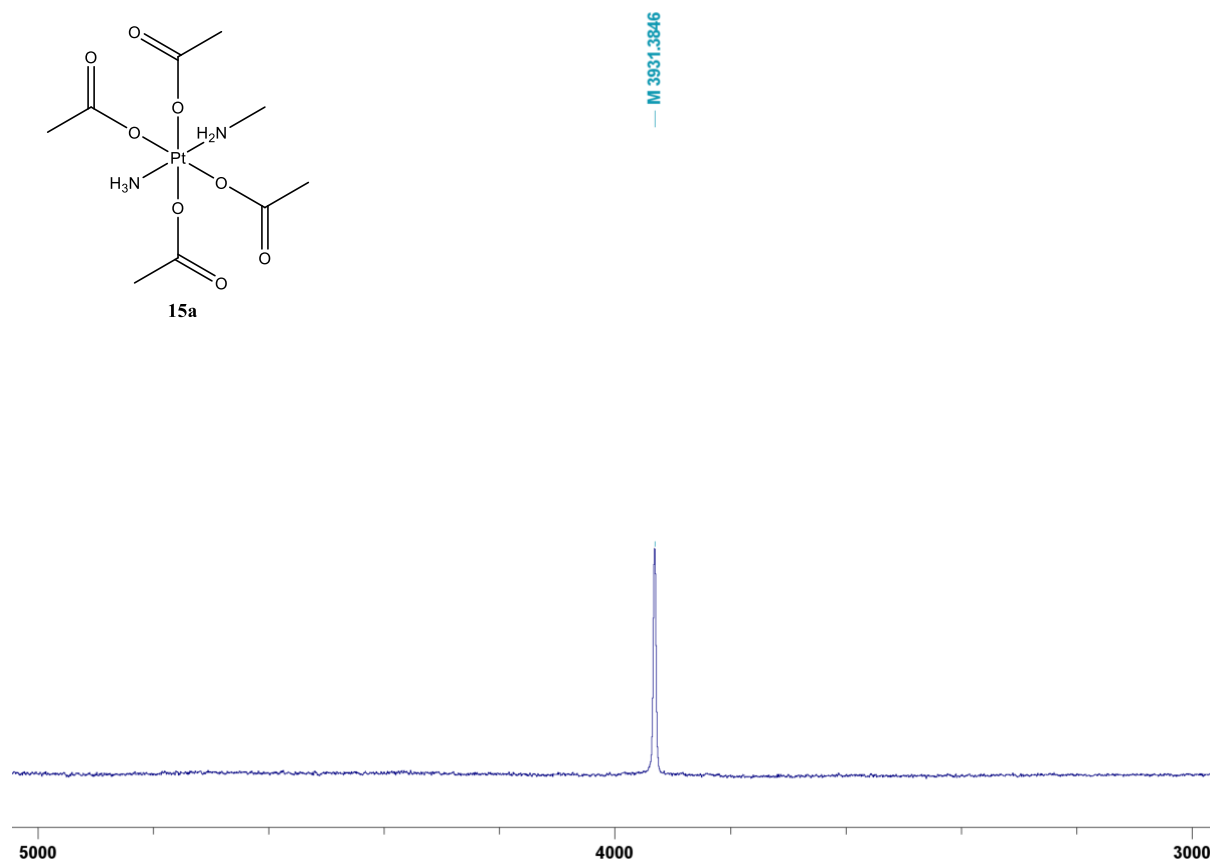

**Figure S94.** <sup>195</sup>Pt NMR spectrum of **15a** in d<sub>6</sub>-DMSO.

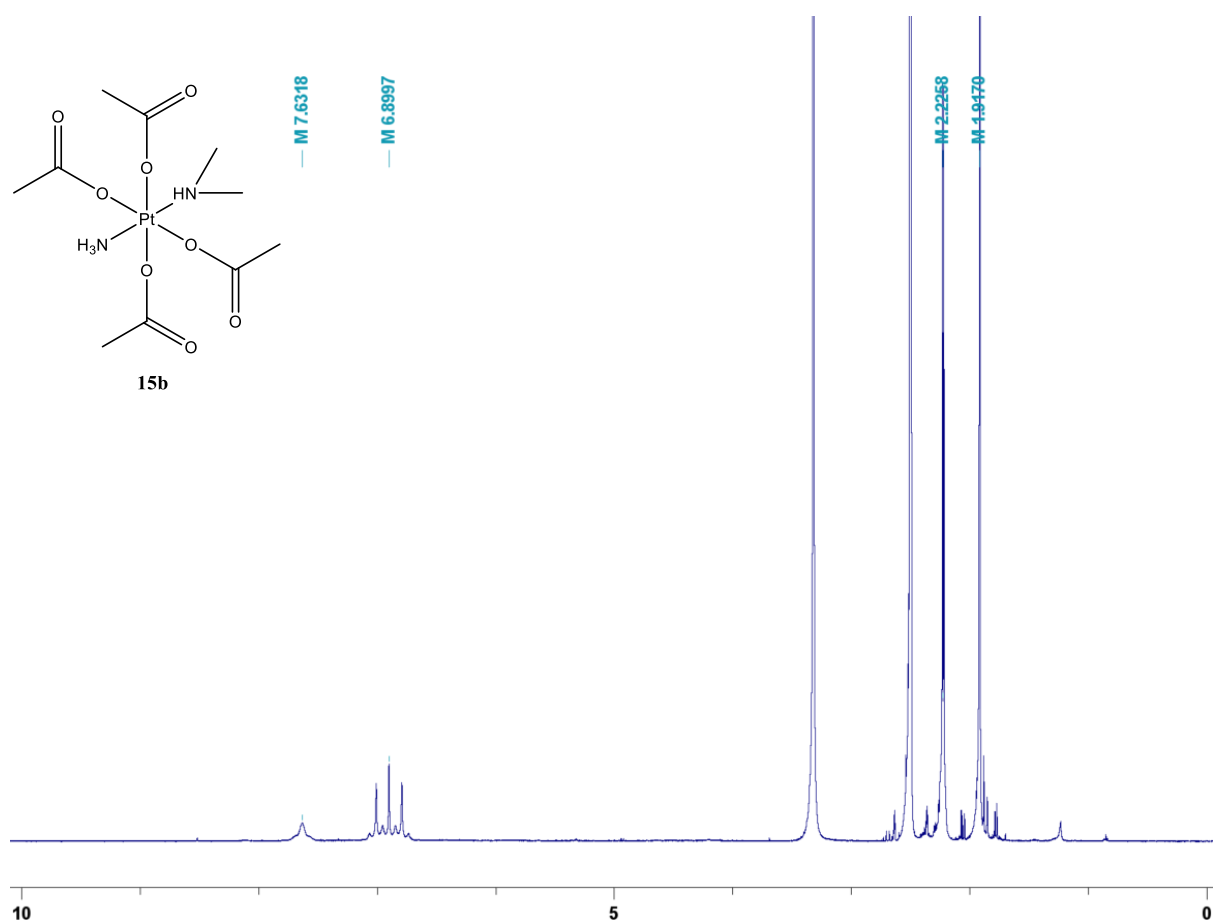

**Figure S95.** <sup>1</sup>H NMR spectrum of **15b** in d<sub>6</sub>-DMSO.

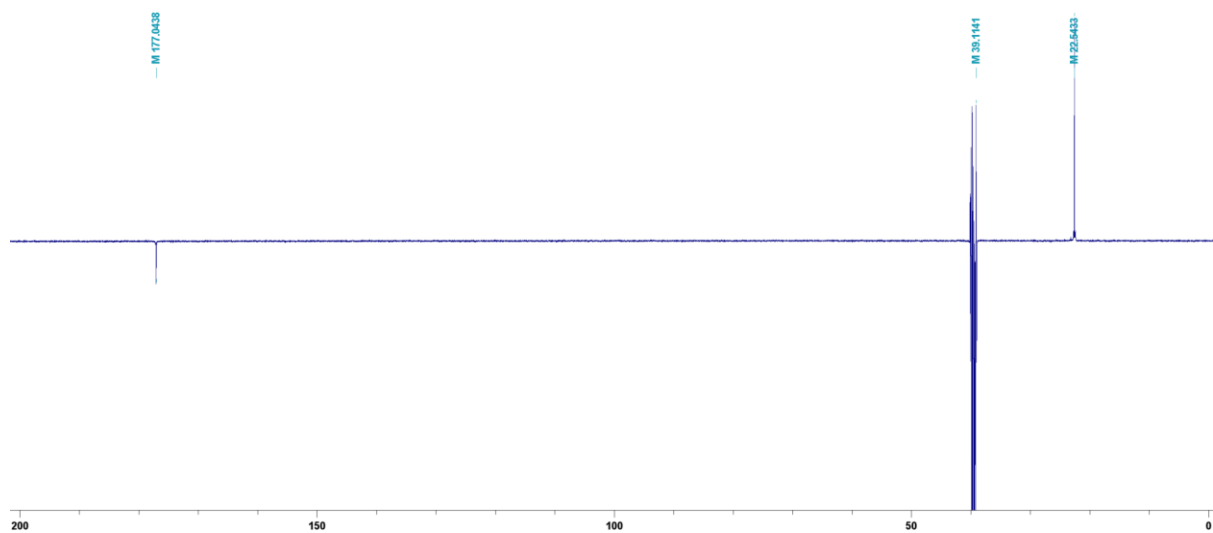

**Figure S96.** <sup>13</sup>C NMR spectrum of **15b** in d<sub>6</sub>-DMSO.

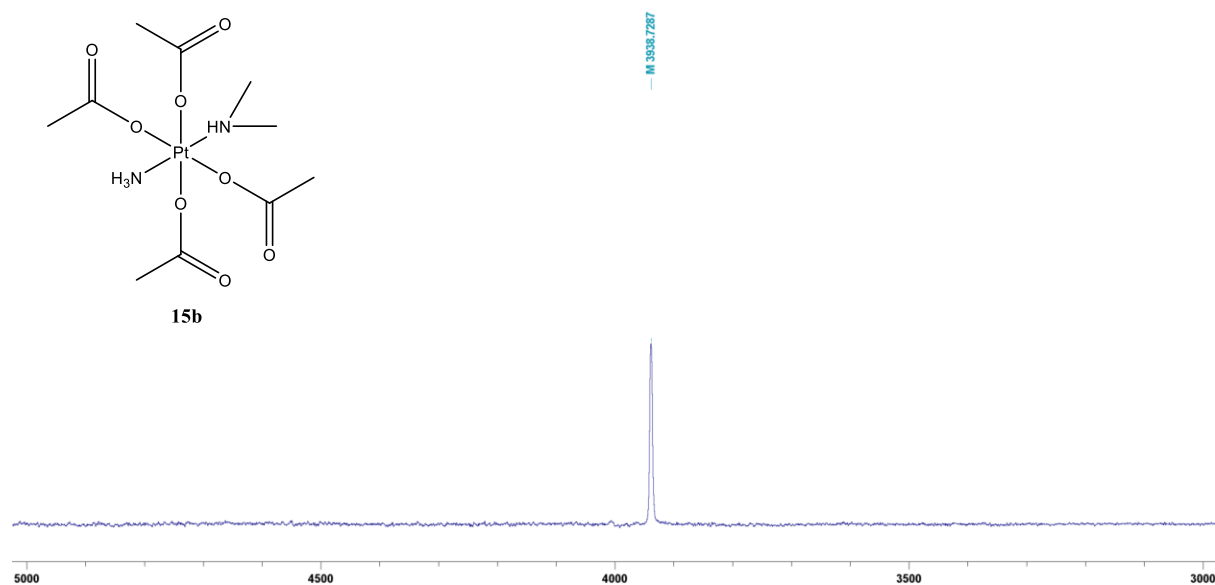

**Figure S97.**  $^{195}\text{Pt}$  NMR spectrum of **15b** in  $\text{d}_6$ -DMSO.

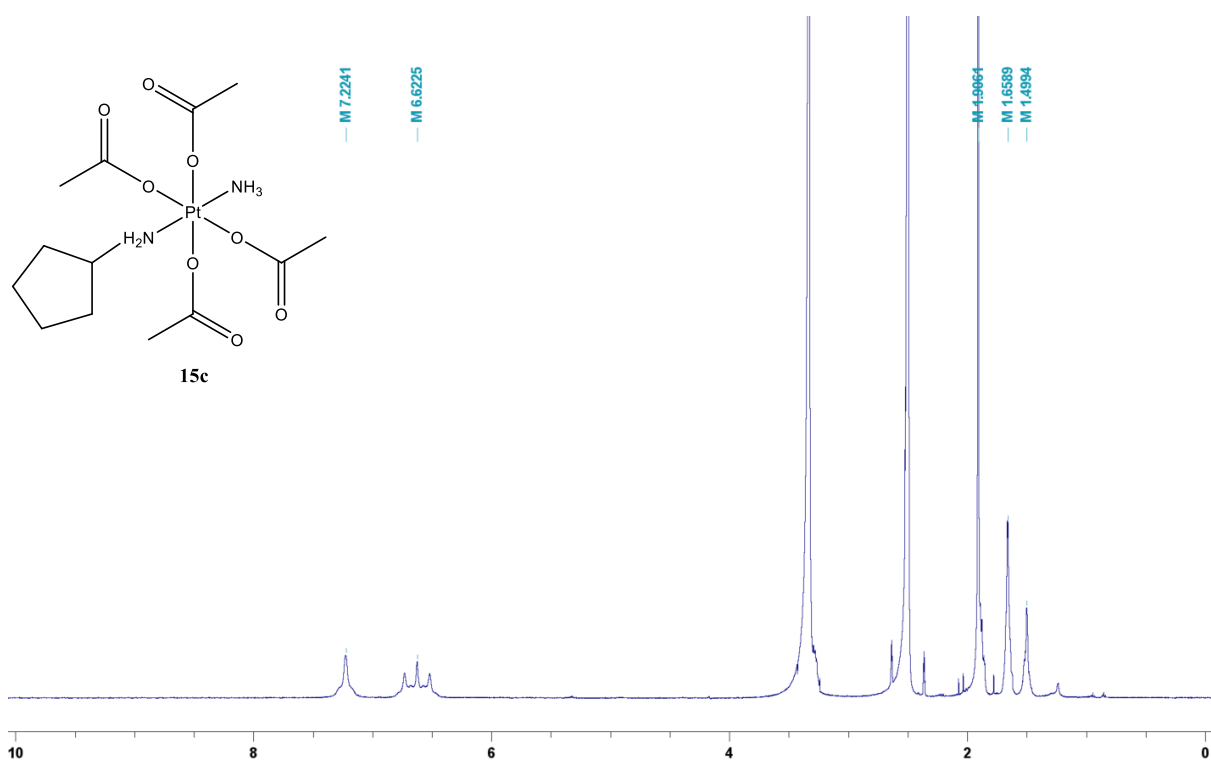

**Figure S98.**  $^1\text{H}$  NMR spectrum of **15c** in  $\text{d}_6$ -DMSO.

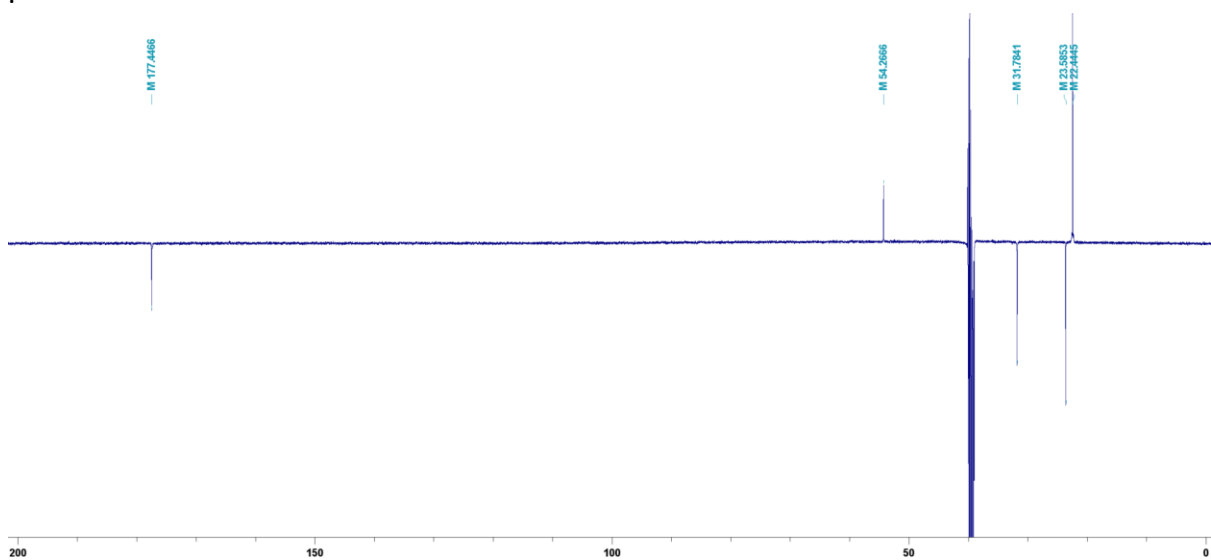

**Figure S99.**  $^{13}\text{C}$  NMR spectrum of **15c** in  $\text{d}_6$ -DMSO.

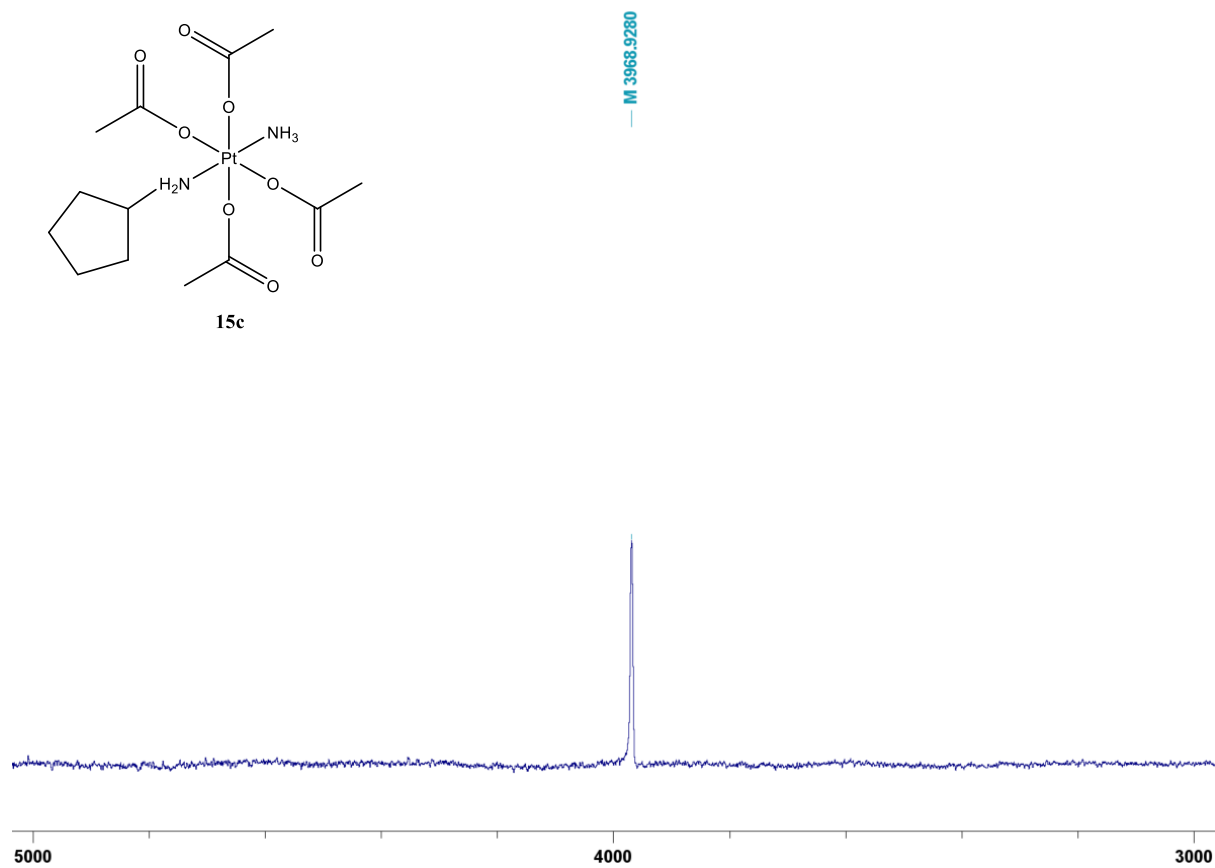

**Figure S100.** <sup>195</sup>Pt NMR spectrum of **15c** in d<sub>6</sub>-DMSO.

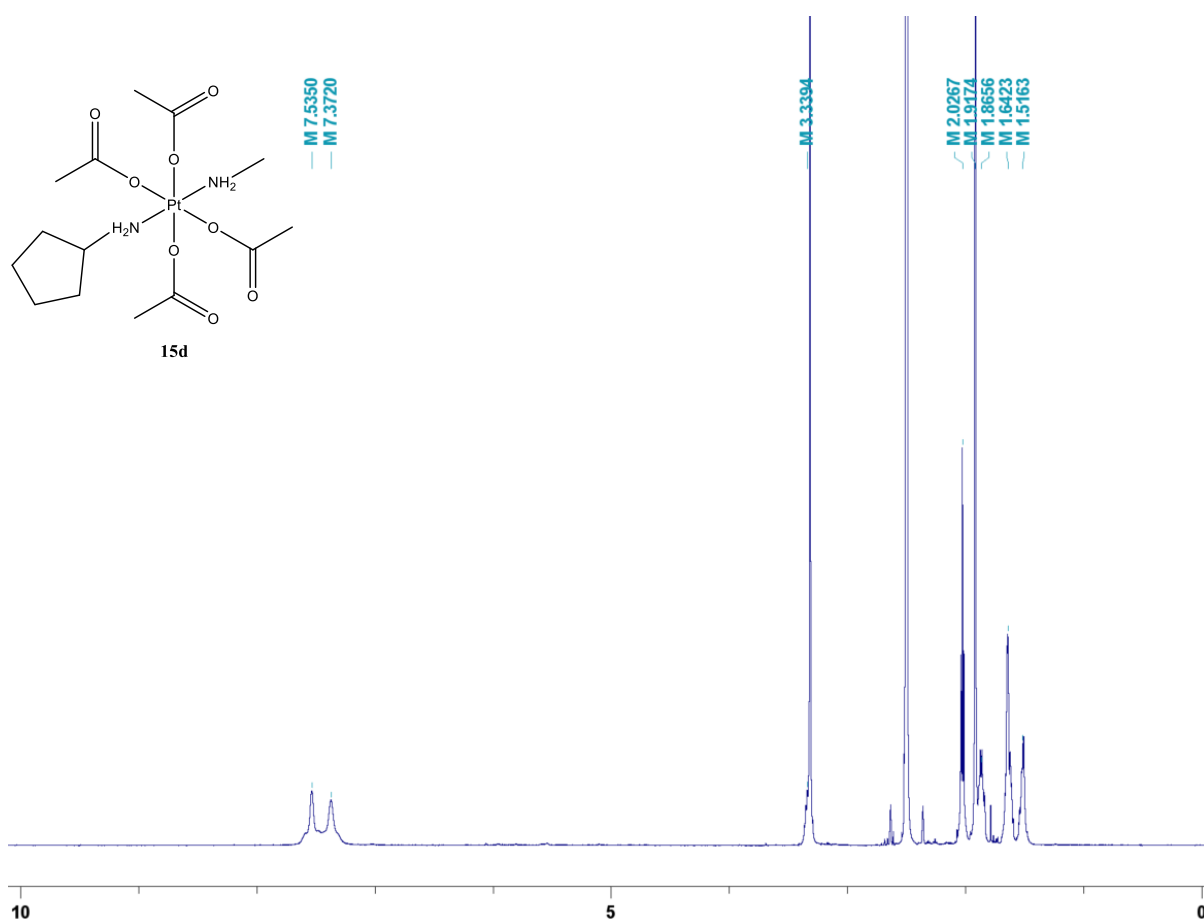

**Figure S101.** <sup>1</sup>H NMR spectrum of **15d** in d<sub>6</sub>-DMSO.

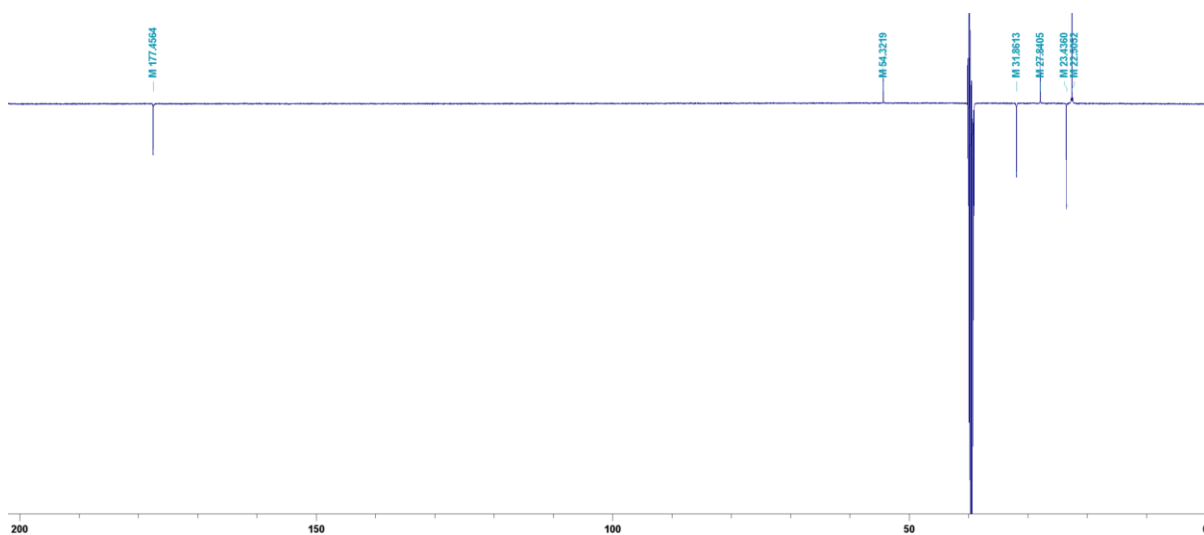

**Figure S102.** <sup>13</sup>C NMR spectrum of **15d** in d<sub>6</sub>-DMSO.

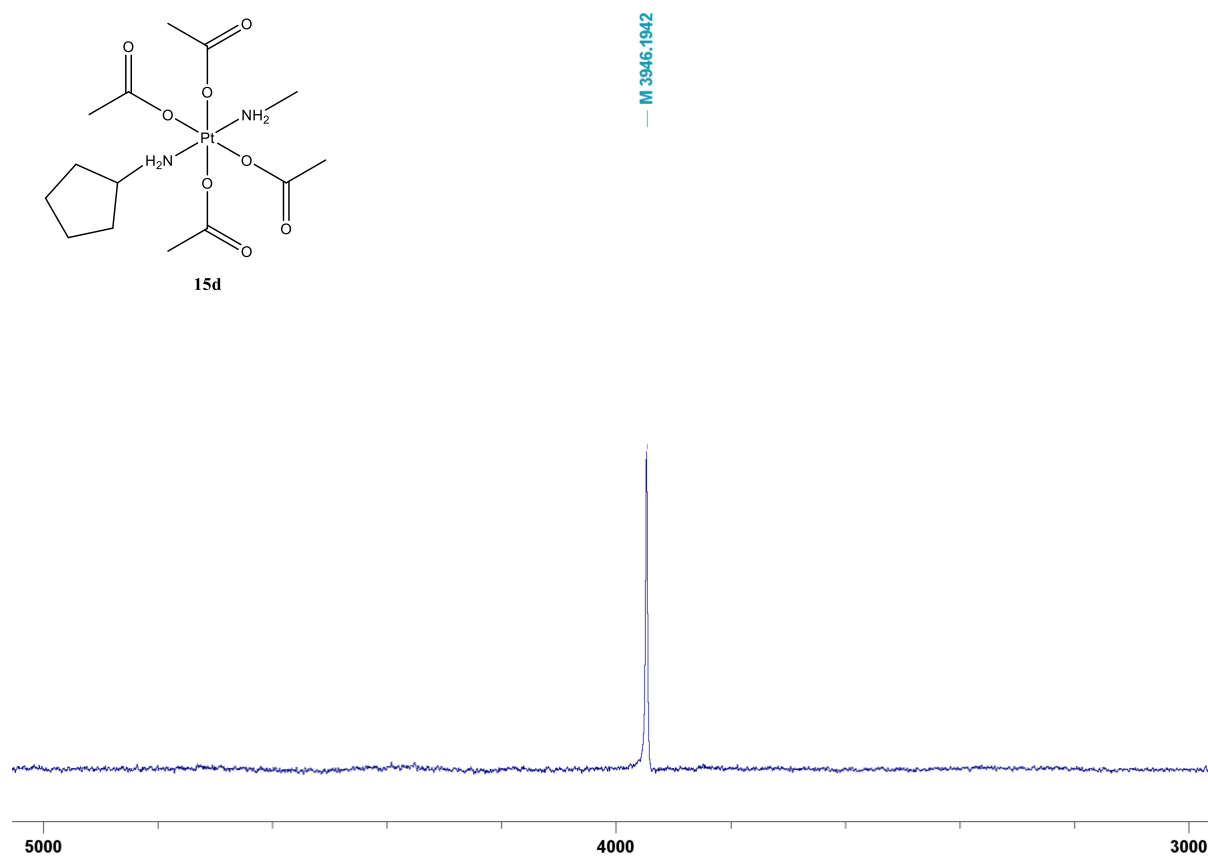

**Figure S103.** <sup>195</sup>Pt NMR spectrum of **15d** in d<sub>6</sub>-DMSO.



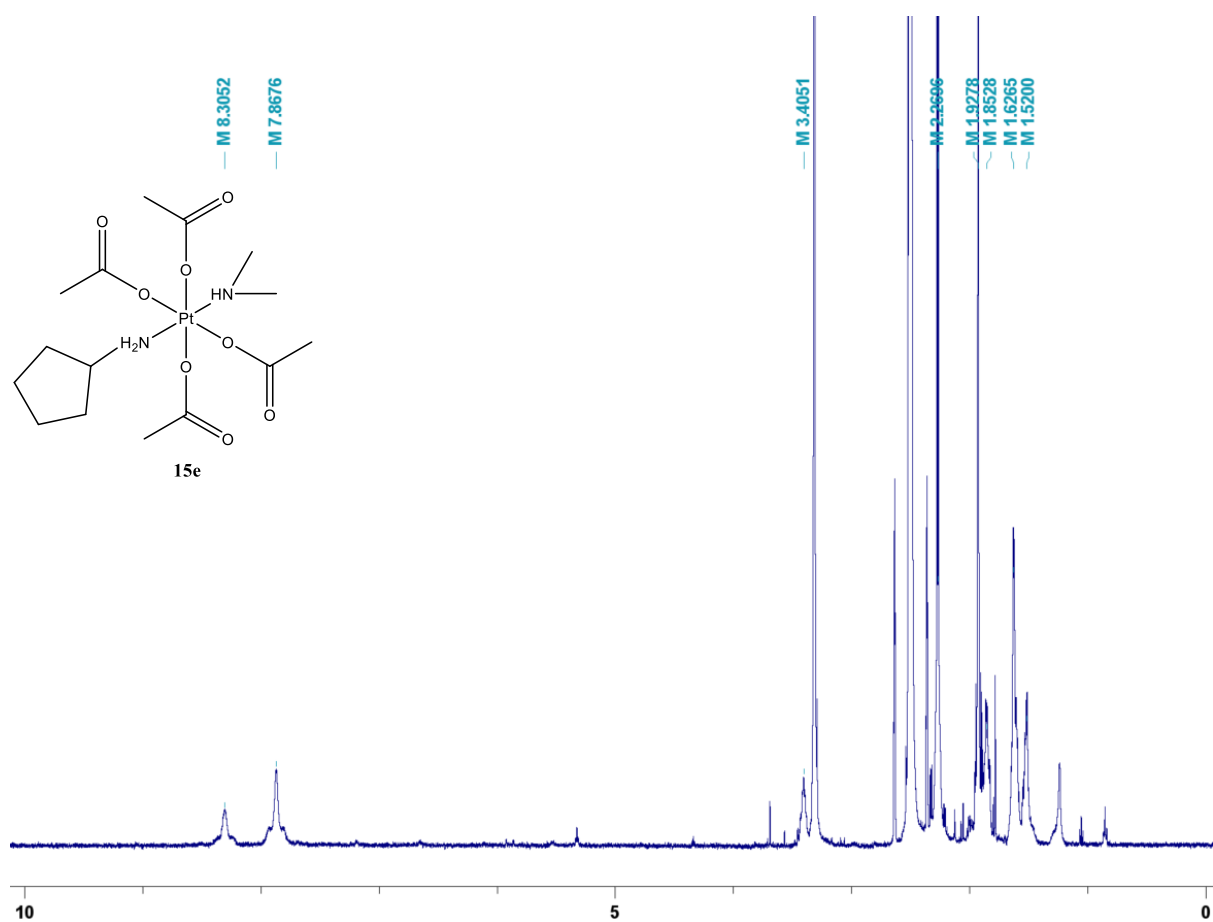

**Figure S104.** <sup>1</sup>H NMR spectrum of **15e** in d<sub>6</sub>-DMSO.

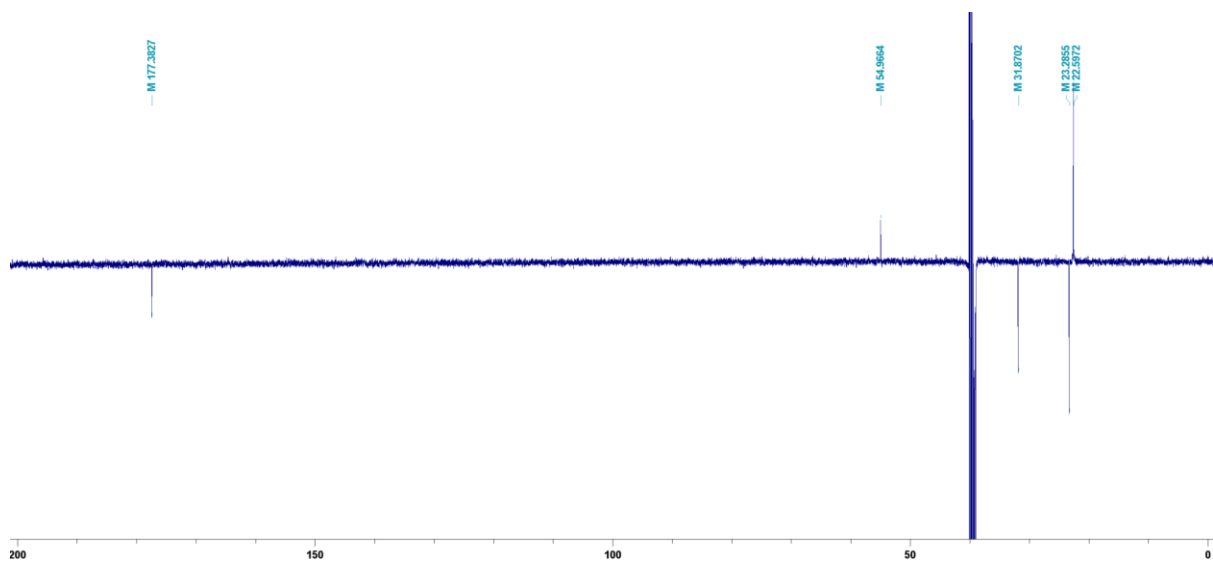

**Figure S105.** <sup>13</sup>C NMR spectrum of **15e** in d<sub>6</sub>-DMSO.

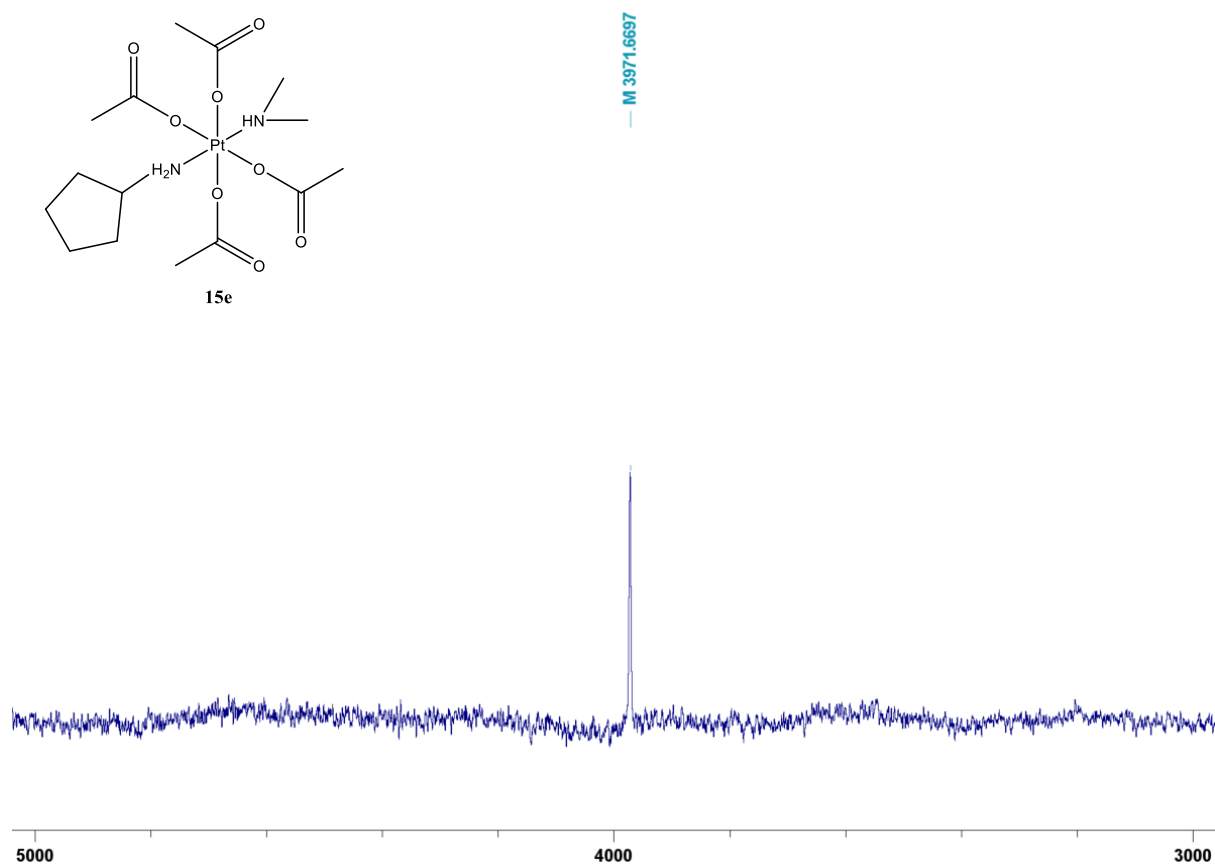

**Figure S106.**  $^{195}\text{Pt}$  NMR spectrum of **15e** in  $\text{d}_6$ -DMSO.

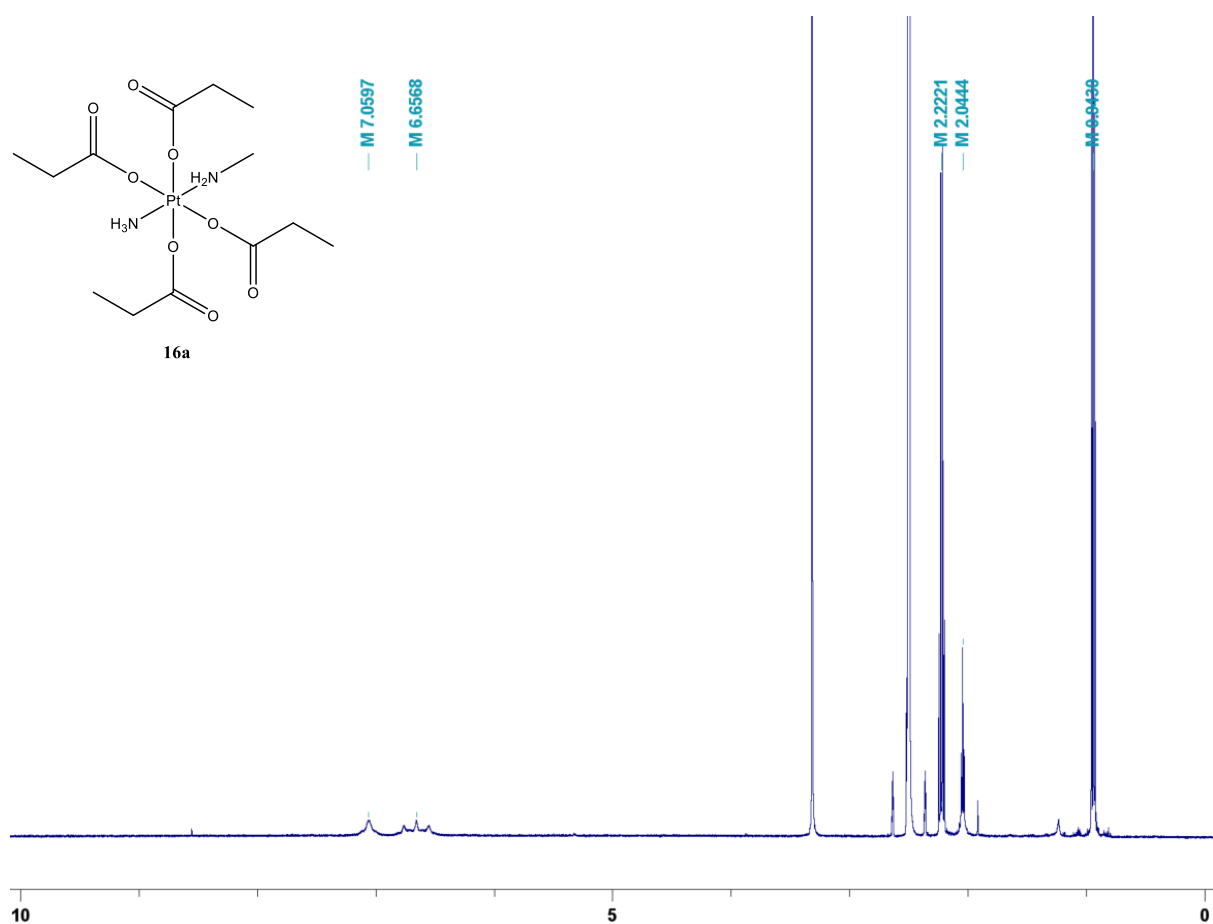

**Figure S107.** <sup>1</sup>H NMR spectrum of **16a** in d<sub>6</sub>-DMSO.

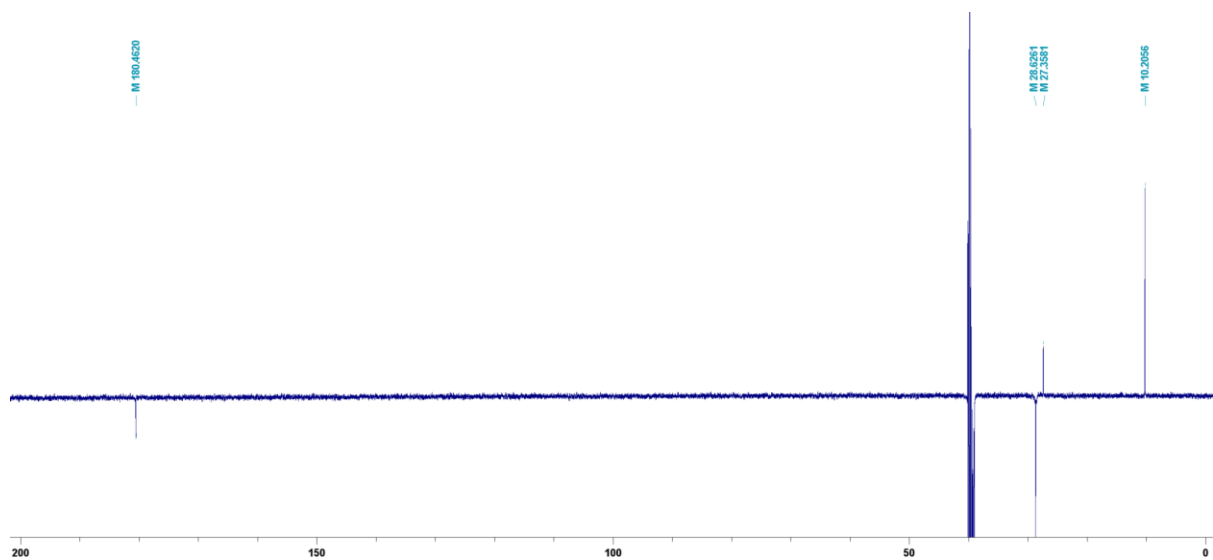

**Figure S108.** <sup>13</sup>C NMR spectrum of **16a** in d<sub>6</sub>-DMSO.

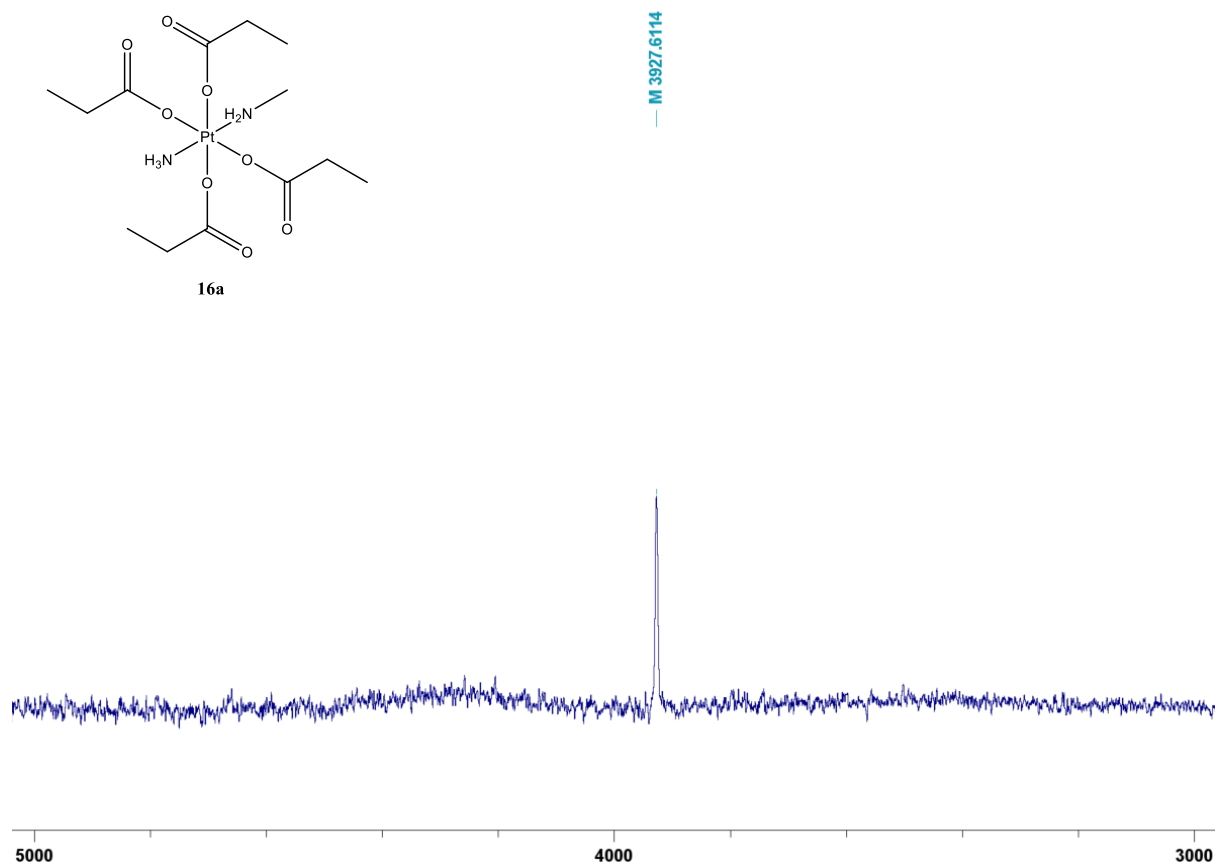

**Figure S109.**  $^{195}\text{Pt}$  NMR spectrum of **16a** in  $\text{d}_6$ -DMSO.

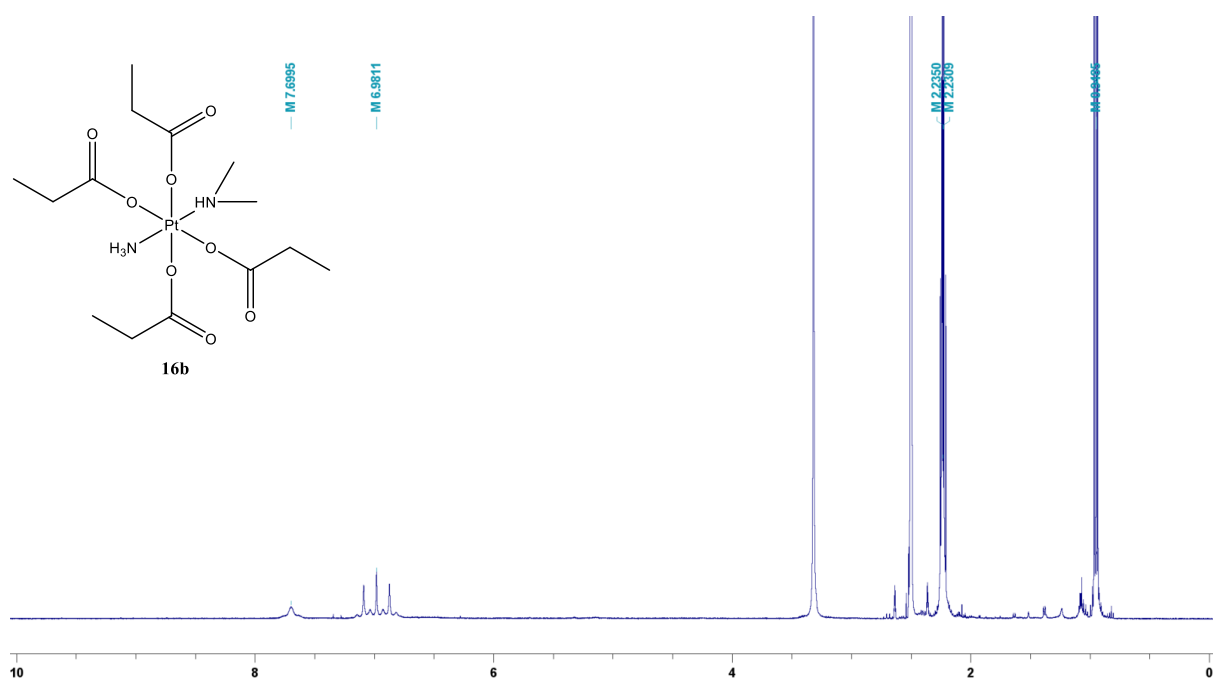

**Figure S110.**  $^1\text{H}$  NMR spectrum of **16b** in  $\text{d}_6$ -DMSO.

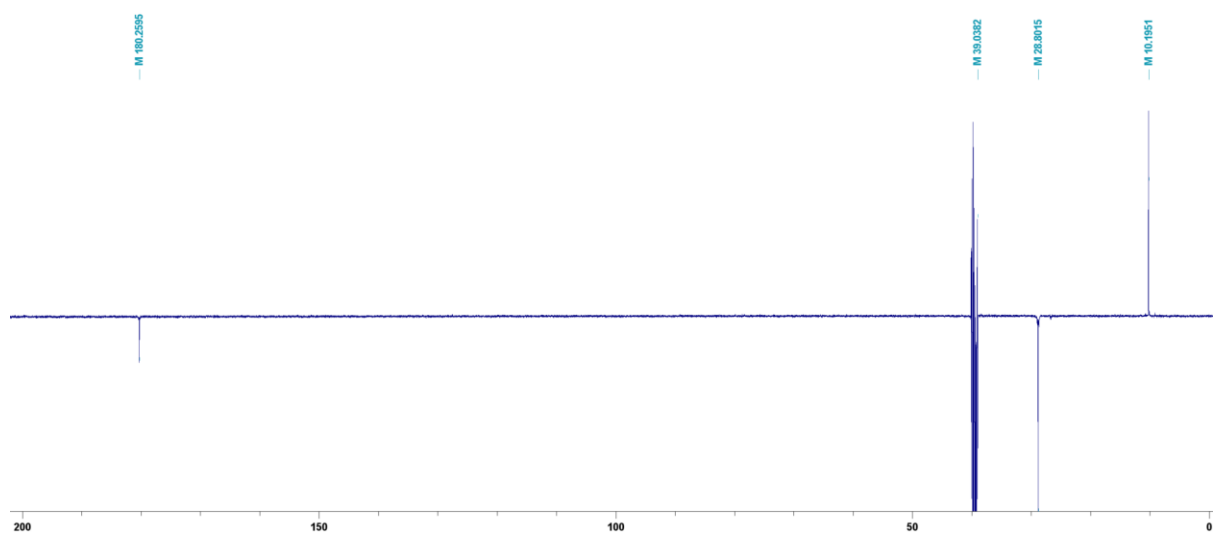

**Figure S111.**  $^{13}\text{C}$  NMR spectrum of **16b** in  $\text{d}_6$ -DMSO.

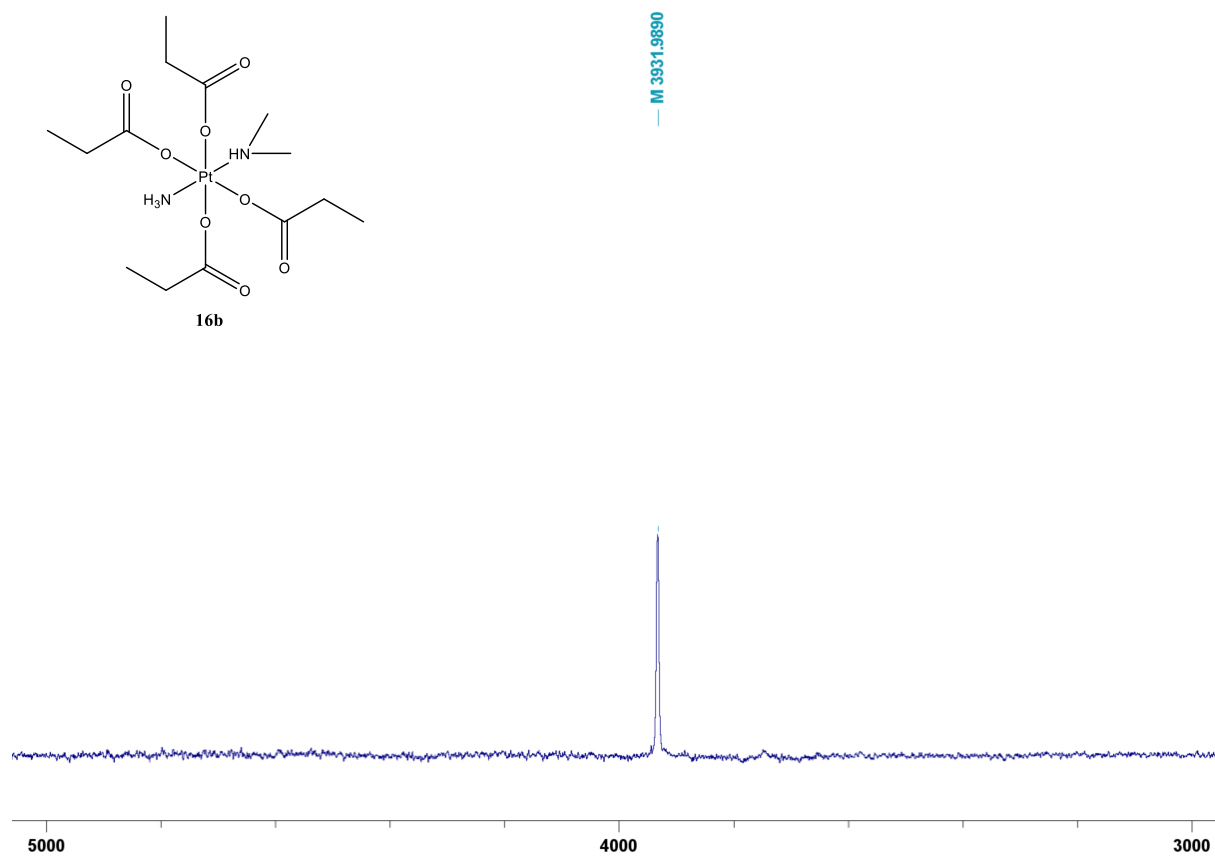

**Figure S112.** <sup>195</sup>Pt NMR spectrum of **16b** in d<sub>6</sub>-DMSO.

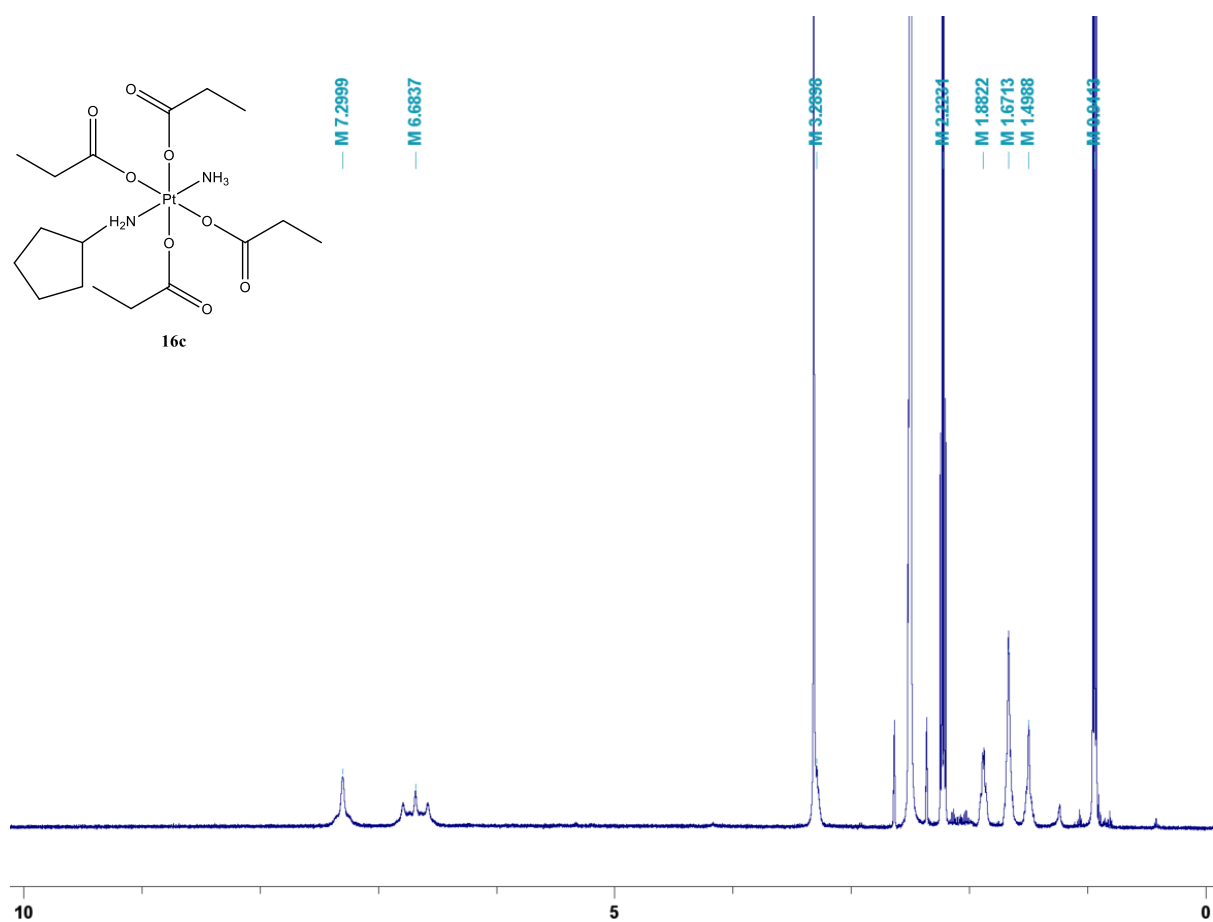

**Figure S113.**  $^1\text{H}$  NMR spectrum of **16c** in  $\text{d}_6\text{-DMSO}$ .

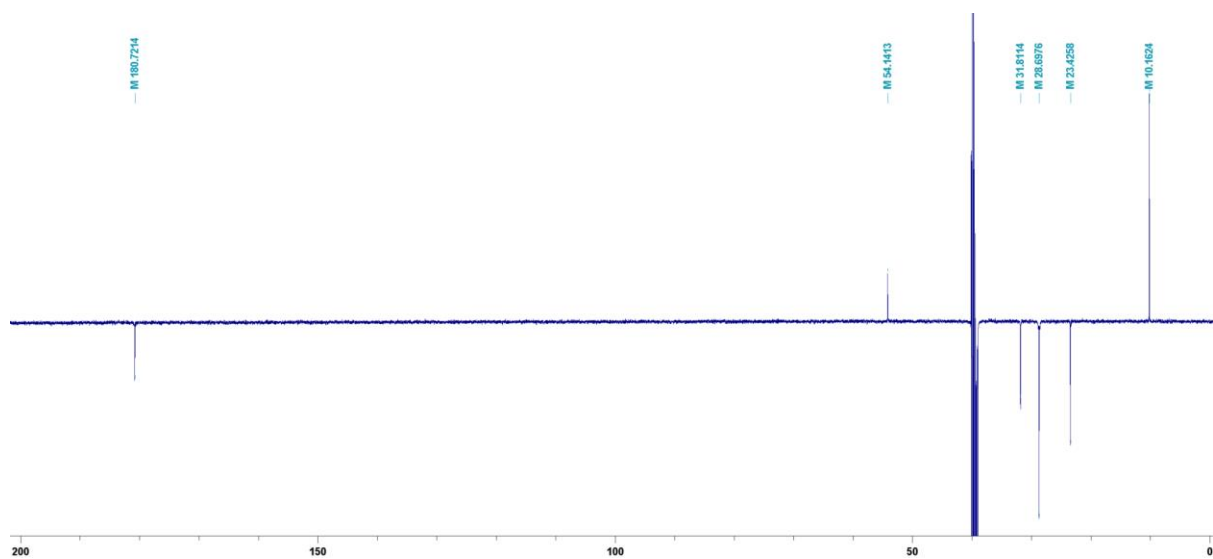

**Figure S114.**  $^{13}\text{C}$  NMR spectrum of **16c** in  $\text{d}_6\text{-DMSO}$ .

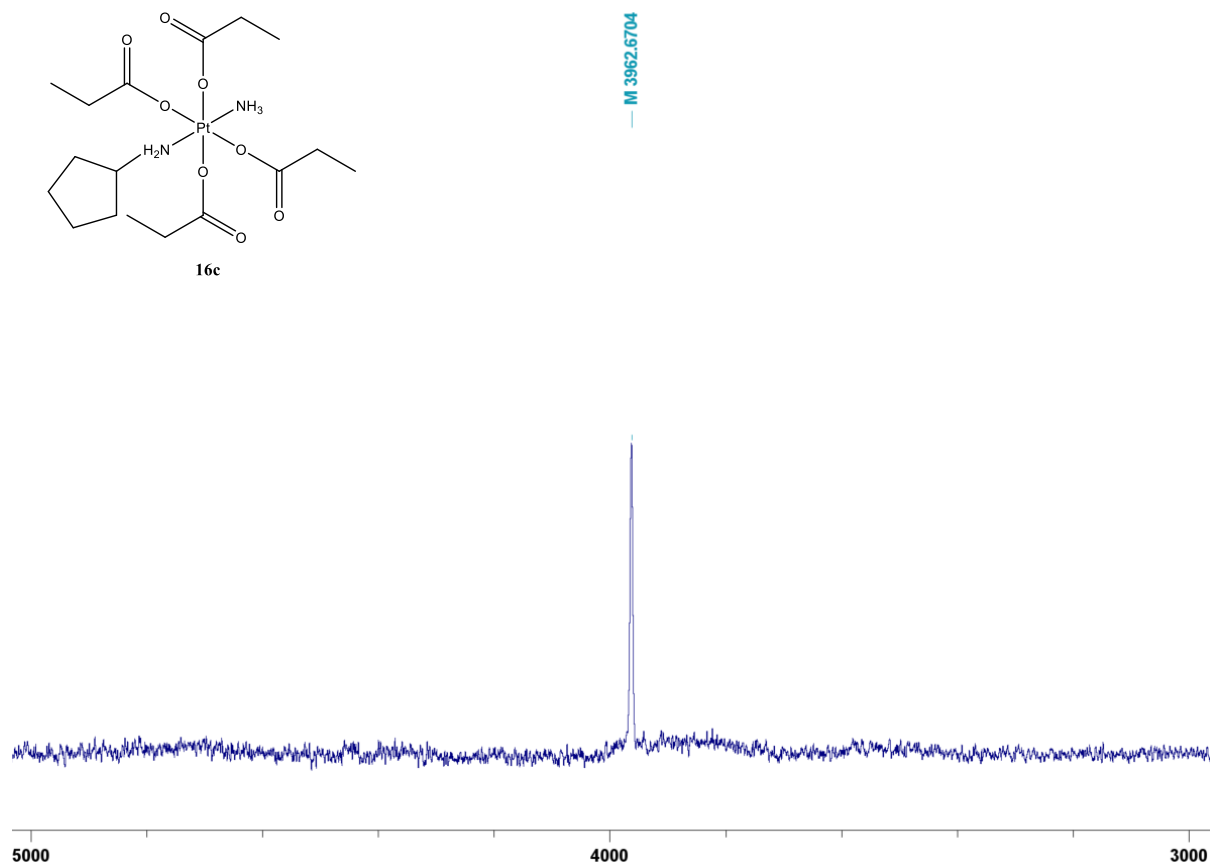

**Figure S115.**  $^{195}\text{Pt}$  NMR spectrum of **16c** in  $\text{d}_6$ -DMSO.



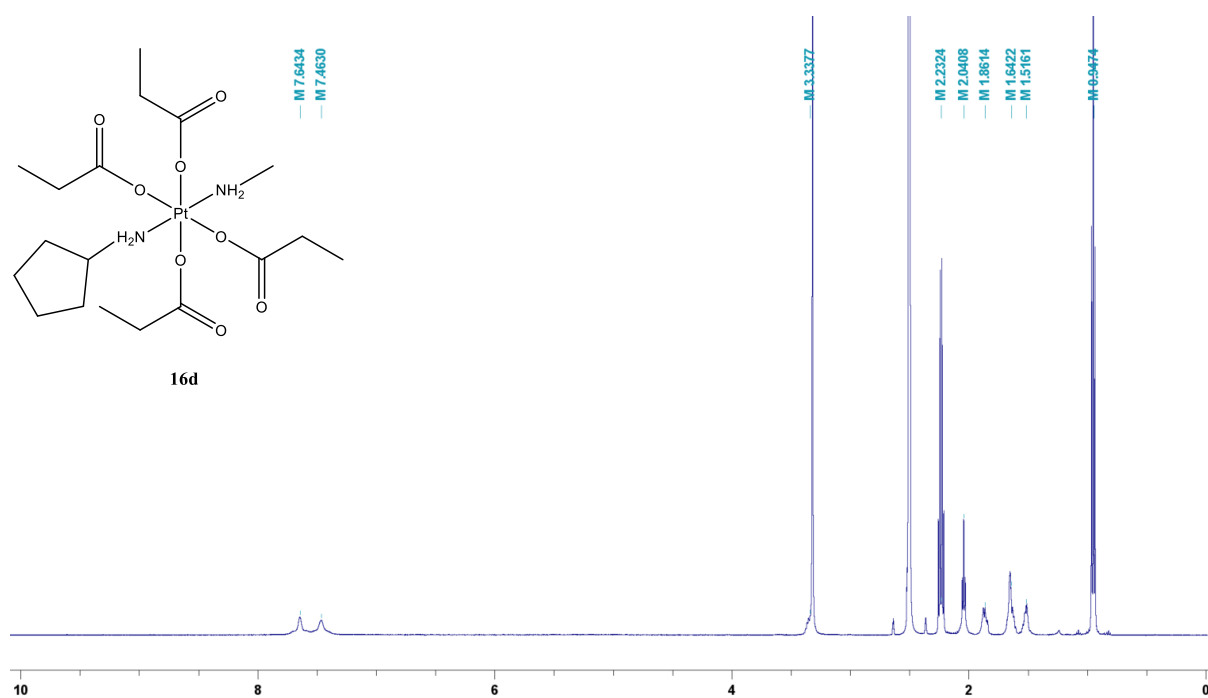

**Figure S116.**  $^1\text{H}$  NMR spectrum of **16d** in  $\text{d}_6$ -DMSO.

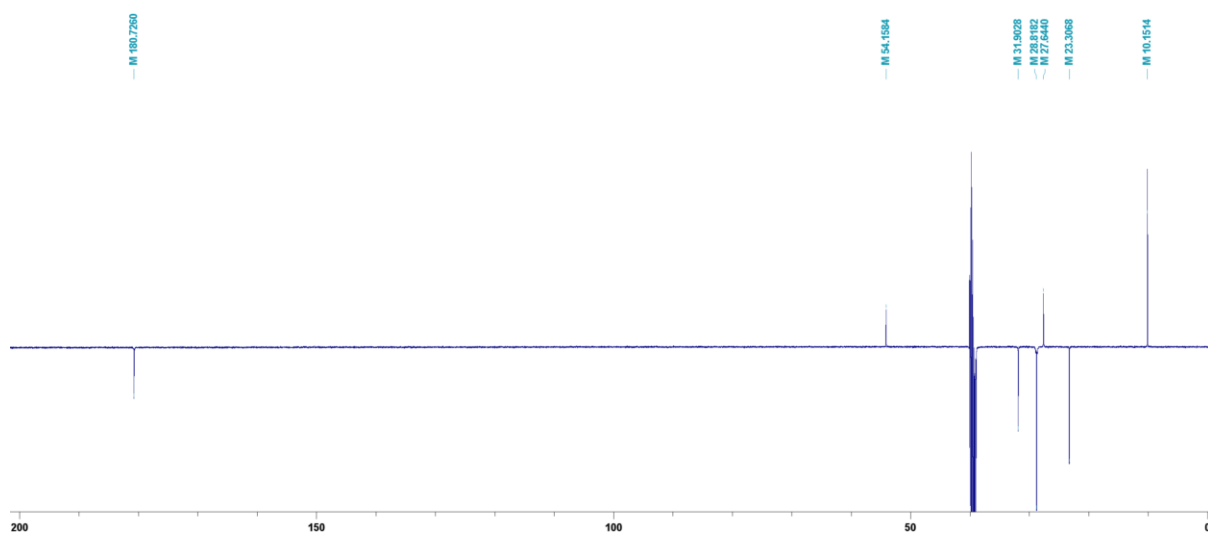

**Figure S117.**  $^{13}\text{C}$  NMR spectrum of **16d** in  $\text{d}_6$ -DMSO.

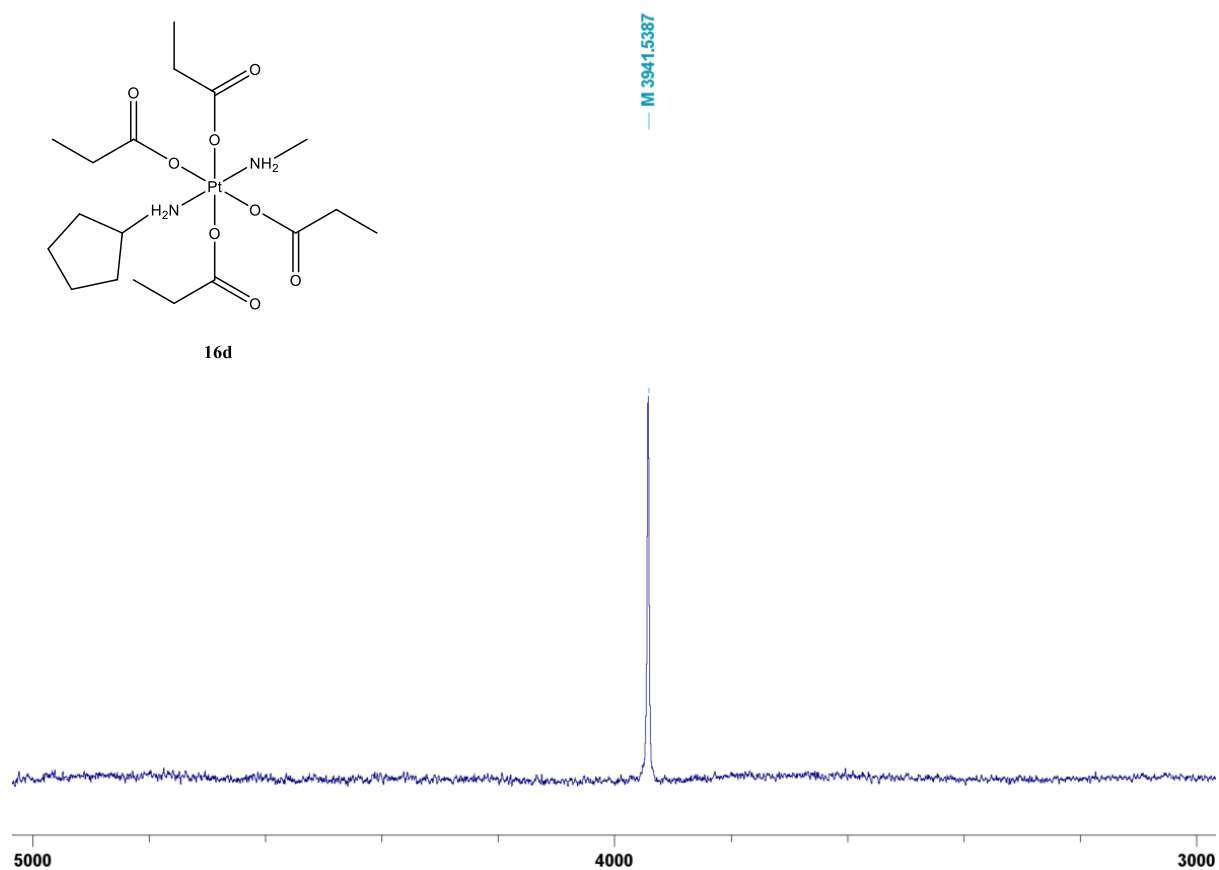

**Figure S118.**  $^{195}\text{Pt}$  NMR spectrum of **16d** in  $\text{d}_6\text{-DMSO}$ .

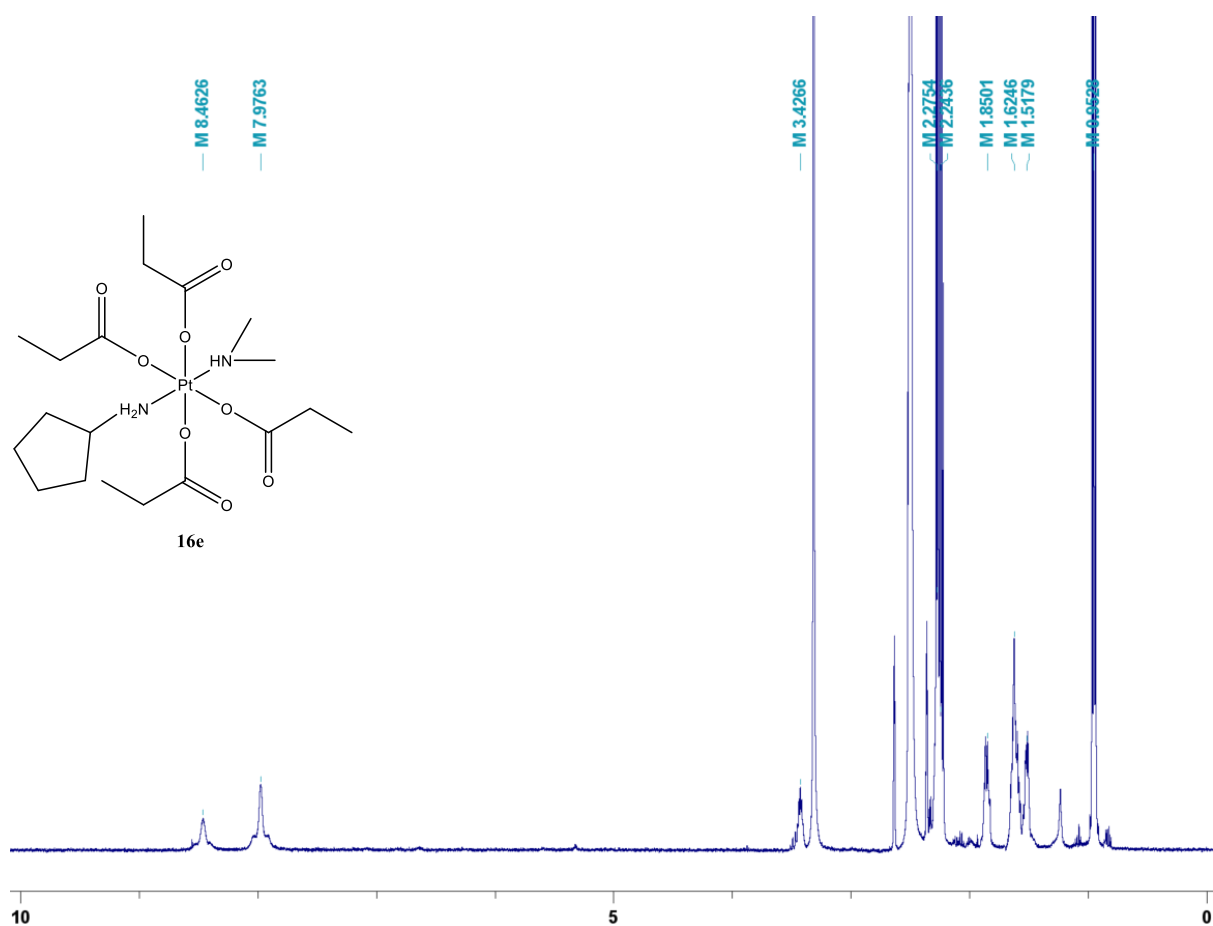

Figure S119. <sup>1</sup>H NMR spectrum of **16e** in d<sub>6</sub>-DMSO.

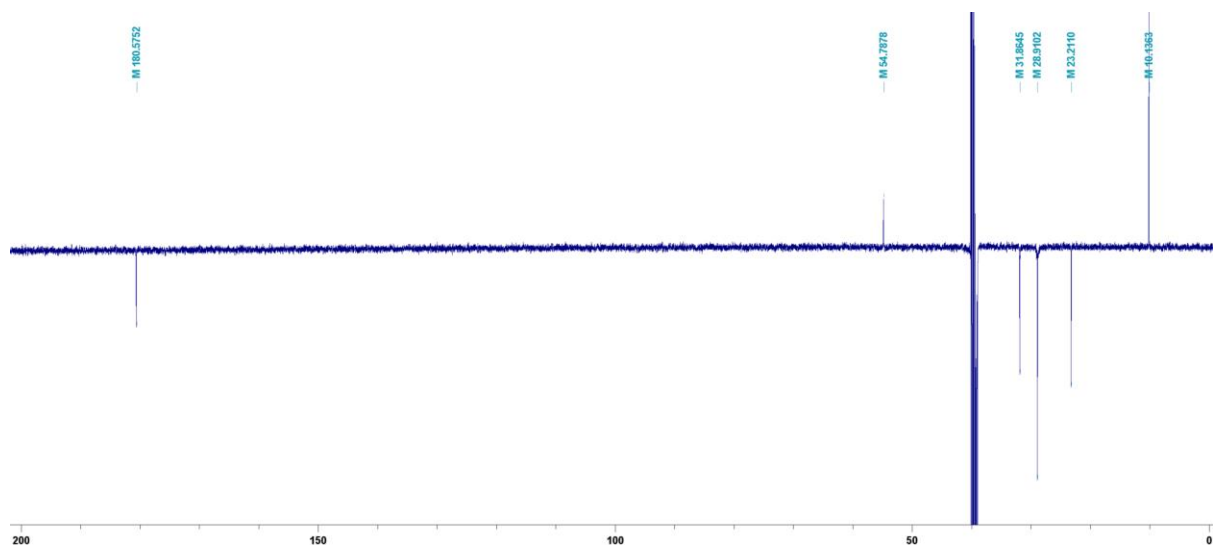

Figure S120. <sup>13</sup>C NMR spectrum of **16e** in d<sub>6</sub>-DMSO.

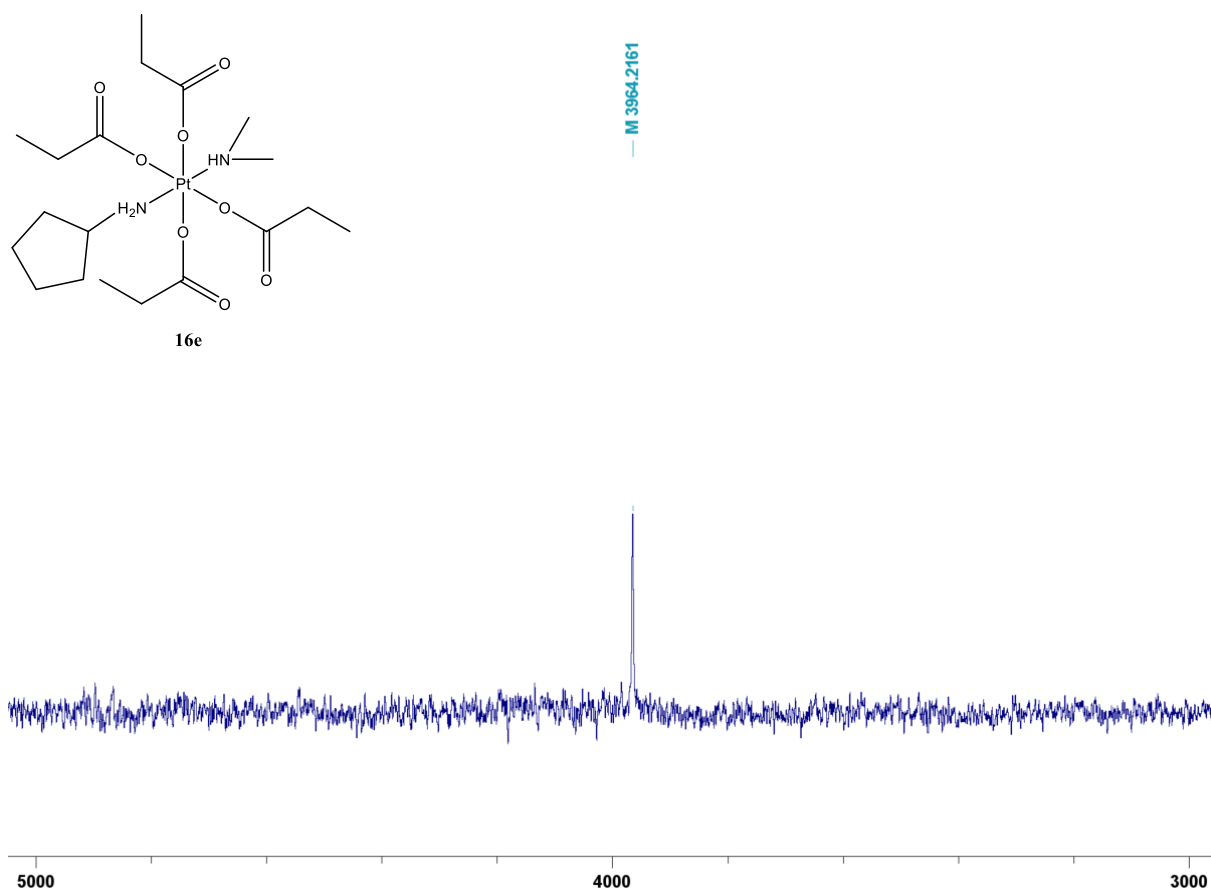

**Figure S121.**  $^{195}\text{Pt}$  NMR spectrum of **16e** in  $\text{d}_6$ -DMSO.

### 3. X-Ray Diffraction Analysis

X-ray intensity data was measured on Bruker D8 Venture diffractometer equipped with multilayer monochromator, Mo K/ $\alpha$  INCOATEC micro focus sealed tube and Oxford cooling system. The structure was solved by Direct Methods. Non-hydrogen atoms were refined with anisotropic displacement parameters. Hydrogen atoms were inserted at calculated positions and refined with riding model. The following software was used: Bruker SAINT software package [1] using a narrow-frame algorithm for frame integration, SADABS [2] for absorption correction, OLEX2 [3] for structure solution, refinement, molecular diagrams and graphical user-interface, ShelXle [4] for refinement and graphical userinterface SHELXS-2015 [5] for structure solution, SHELXL-2015 [6] for refinement, Platon [7] for symmetry check. Crystallographic data have been deposited with the Cambridge Crystallographic Data Center with No. CSD 2252956 (**2a**), 2252957 (**2c**), 2252958 (**1e**), 2252959 (**12e**), 2252960 (**1d**), 2252961 (**2e**), 2252962 (**1a**), 2252963 (**13c**) and 2252964 (**15e**). Copies of data can be obtained free of charge (available online: <https://www.ccdc.cam.ac.uk/structures/>).

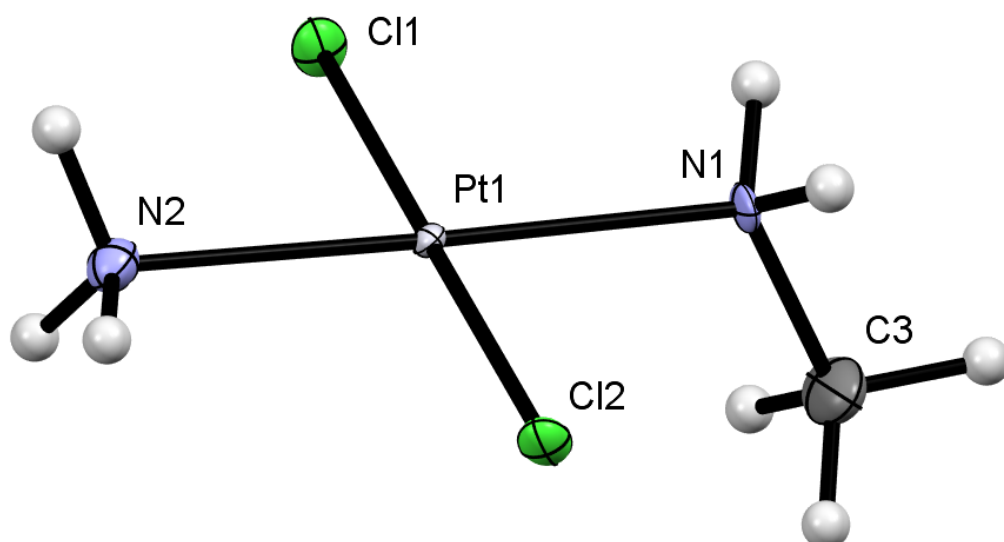

**Figure S122.** ORTEP view of complex **1a** drawn with 50% displacement ellipsoids.

**Table S1.** Overview of the sample and crystal data, data collection and structure refinement of complex **1a**.

| Identification code               | kryv770_a                                                                                                                         |
|-----------------------------------|-----------------------------------------------------------------------------------------------------------------------------------|
| Empirical formula                 | CH <sub>8</sub> Cl <sub>2</sub> N <sub>2</sub> Pt                                                                                 |
| Formula weight                    | 314.08                                                                                                                            |
| Temperature                       | 100 K                                                                                                                             |
| Wavelength                        | 1.54186 Å                                                                                                                         |
| Crystal system                    | Monoclinic                                                                                                                        |
| Space group                       | P 1 2 <sub>1</sub> /c 1                                                                                                           |
| Unit cell dimensions              | a = 5.6990(11) Å<br>b = 5.9525(12) Å<br>c = 18.890(4) Å<br>$\alpha = 90^\circ$<br>$\beta = 96.19(3)^\circ$<br>$\gamma = 90^\circ$ |
| Volume                            | 637.09(11) Å <sup>3</sup>                                                                                                         |
| Z                                 | 4                                                                                                                                 |
| Density (calculated)              | 3.275 Mg/m <sup>3</sup>                                                                                                           |
| Absorption coefficient            | 47.919 mm <sup>-1</sup>                                                                                                           |
| F(000)                            | 560                                                                                                                               |
| Crystal size                      | 0.090 x 0.070 x 0.060 mm <sup>3</sup>                                                                                             |
| Theta range for data collection   | 4.709 to 68.070°                                                                                                                  |
| Index ranges                      | -6 ≤ h ≤ 6, -7 ≤ k ≤ 6, -8 ≤ l ≤ 22                                                                                               |
| Reflections collected             | 9699                                                                                                                              |
| Independent reflections           | 1147 [R(int) = 0.0300]                                                                                                            |
| Completeness to theta = 67.679°   | 99.2%                                                                                                                             |
| Absorption correction             | Semi-empirical from equivalents                                                                                                   |
| Max. and min. transmission        | 0.4959 and 0.3492                                                                                                                 |
| Refinement method                 | Full-matrix least-squares on F <sup>2</sup>                                                                                       |
| Data / restraints / parameters    | 1147 / 0 / 55                                                                                                                     |
| Goodness-of-fit on F <sup>2</sup> | 1.265                                                                                                                             |
| Final R indices [I>2sigma(I)]     | R <sub>1</sub> = 0.0260, wR <sub>2</sub> = 0.0667                                                                                 |
| R indices (all data)              | R <sub>1</sub> = 0.0263, wR <sub>2</sub> = 0.0669                                                                                 |
| Extinction coefficient            | n/a                                                                                                                               |
| Largest diff. peak and hole       | 1.176 and -2.454 e·Å <sup>-3</sup>                                                                                                |

**Table S2.** Overview of bond lengths of complex **1a**.

| Atoms       | Length [Å] | Atoms      | Length [Å] |
|-------------|------------|------------|------------|
| Pt(1)-Cl(1) | 2.2913(16) | C(3)-H(3A) | 0.98       |
| Pt(1)-Cl(2) | 2.2975(15) | C(3)-H(3B) | 0.98       |
| Pt(1)-N(1)  | 2.046(5)   | C(3)-H(3C) | 0.98       |
| Pt(1)-N(2)  | 2.038(6)   | N(2)-H(2A) | 0.91       |
| N(1)-H(1A)  | 0.91       | N(2)-H(2B) | 0.91       |
| N(1)-H(1B)  | 0.91       | N(2)-H(2C) | 0.91       |
| N(1)-C(3)   | 1.476(9)   |            |            |

**Table S3.** Overview of angles of complex **1a**.

| Atoms             | Angle [°] | Atoms            | Angle [°] |
|-------------------|-----------|------------------|-----------|
| Cl(1)-Pt(1)-Cl(2) | 178.24(5) | N(1)-C(3)-H(3A)  | 109.5     |
| N(1)-Pt(1)-Cl(1)  | 89.38(17) | N(1)-C(3)-H(3B)  | 109.5     |
| N(1)-Pt(1)-Cl(2)  | 89.56(17) | N(1)-C(3)-H(3C)  | 109.5     |
| N(2)-Pt(1)-Cl(1)  | 89.83(17) | H(3A)-C(3)-H(3B) | 109.5     |
| N(2)-Pt(1)-Cl(2)  | 91.25(17) | H(3A)-C(3)-H(3C) | 109.5     |
| N(2)-Pt(1)-N(1)   | 178.7(2)  | H(3B)-C(3)-H(3C) | 109.5     |
| Pt(1)-N(1)-H(1A)  | 108.3     | Pt(1)-N(2)-H(2A) | 109.5     |
| Pt(1)-N(1)-H(1B)  | 108.3     | Pt(1)-N(2)-H(2B) | 109.5     |
| H(1A)-N(1)-H(1B)  | 107.4     | Pt(1)-N(2)-H(2C) | 109.5     |
| C(3)-N(1)-Pt(1)   | 115.8(4)  | H(2A)-N(2)-H(2B) | 109.5     |
| C(3)-N(1)-H(1A)   | 108.3     | H(2A)-N(2)-H(2C) | 109.5     |
| C(3)-N(1)-H(1B)   | 108.3     | H(2B)-N(2)-H(2C) | 109.5     |



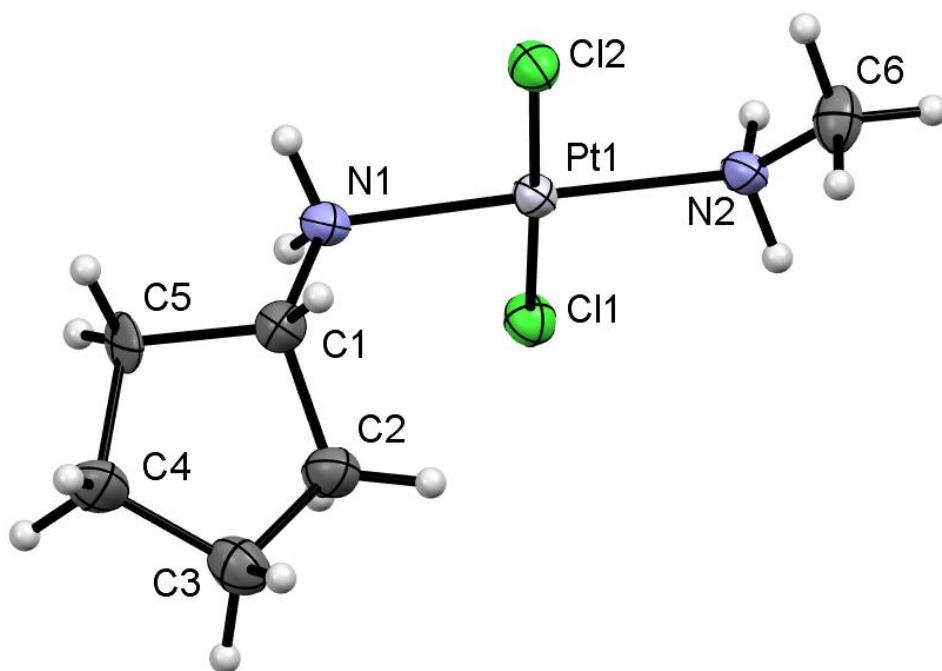

**Figure S123.** ORTEP view of complex **1d** drawn with 50% displacement ellipsoids.

**Table S4.** Overview of the sample and crystal data, data collection and structure refinement of complex **1d**.

| Identification code               | KRYV682_a                                                                                        |
|-----------------------------------|--------------------------------------------------------------------------------------------------|
| Empirical formula                 | C <sub>6</sub> H <sub>16</sub> Cl <sub>2</sub> N <sub>2</sub> Pt                                 |
| Formula weight                    | 382.19                                                                                           |
| Temperature                       | 100 K                                                                                            |
| Wavelength                        | 1.54186 Å                                                                                        |
| Crystal system                    | Monoclinic                                                                                       |
| Space group                       | P2 <sub>1</sub> /n                                                                               |
| Unit cell dimensions              | a = 11.6303(5) Å<br>b = 6.2055(3) Å<br>c = 14.8908(7) Å<br>α = 90°<br>β = 104.791(4)°<br>γ = 90° |
| Volume                            | 1039.09(8) Å <sup>3</sup>                                                                        |
| Z                                 | 4                                                                                                |
| Density (calculated)              | 2.443 Mg/m <sup>3</sup>                                                                          |
| Absorption coefficient            | 29.555 mm <sup>-1</sup>                                                                          |
| F(000)                            | 712                                                                                              |
| Crystal size                      | 0.160 x 0.028 x 0.015 mm <sup>3</sup>                                                            |
| Theta range for data collection   | 4.327 to 69.989°                                                                                 |
| Index ranges                      | -12 ≤ h ≤ 14, -7 ≤ k ≤ 6, -11 ≤ l ≤ 18                                                           |
| Reflections collected             | 10602                                                                                            |
| Independent reflections           | 1949 [R(int) = 0.0596]                                                                           |
| Completeness to theta = 67.679°   | 99.6%                                                                                            |
| Absorption correction             | Semi-empirical from equivalents                                                                  |
| Max. and min. transmission        | 0.1923 and 0.1104                                                                                |
| Refinement method                 | Full-matrix least-squares on F <sup>2</sup>                                                      |
| Data / restraints / parameters    | 1949 / 0 / 101                                                                                   |
| Goodness-of-fit on F <sup>2</sup> | 1.040                                                                                            |
| Final R indices [I>2σ(I)]         | R <sub>1</sub> = 0.0665, wR <sub>2</sub> = 0.1770                                                |
| R indices (all data)              | R <sub>1</sub> = 0.0685, wR <sub>2</sub> = 0.1797                                                |
| Extinction coefficient            | n/a                                                                                              |
| Largest diff. peak and hole       | 6.419 and -3.428 e·Å <sup>-3</sup>                                                               |

**Table S5.** Overview of bond lengths of complex **1d**.

| Atoms   | Length [Å] | Atoms | Length [Å] |
|---------|------------|-------|------------|
| Pt1-N1  | 2.044(8)   | C1-C2 | 1.510(15)  |
| Pt1-N2  | 2.046(8)   | C1-C5 | 1.518(14)  |
| Pt1-Cl1 | 2.295(2)   | C2-C3 | 1.544(16)  |
| Pt1-Cl2 | 2.299(2)   | C3-C4 | 1.550(18)  |
| N1-C1   | 1.467(14)  | C4-C5 | 1.519(15)  |
| N2-C6   | 1.474(13)  |       |            |

**Table S6.** Overview of angles of complex **1d**.

| Atoms       | Angle [°] | Atoms    | Angle [°] |
|-------------|-----------|----------|-----------|
| N1-Pt1-N2   | 177.5(3)  | N1-C1-C2 | 113.7(10) |
| N1-Pt1-Cl1  | 90.5(3)   | N1-C1-C5 | 114.5(9)  |
| N2-Pt1-Cl1  | 87.0(3)   | C2-C1-C5 | 104.0(9)  |
| N1-Pt1-Cl2  | 88.4(3)   | C1-C2-C3 | 103.9(10) |
| N2-Pt1-Cl2  | 94.1(3)   | C2-C3-C4 | 104.9(10) |
| Cl1-Pt1-Cl2 | 177.95(8) | C5-C4-C3 | 106.2(9)  |
| C1-N1-Pt1   | 117.0(7)  | C1-C5-C4 | 106.5(10) |
| C6-N2-Pt1   | 122.0(7)  |          |           |

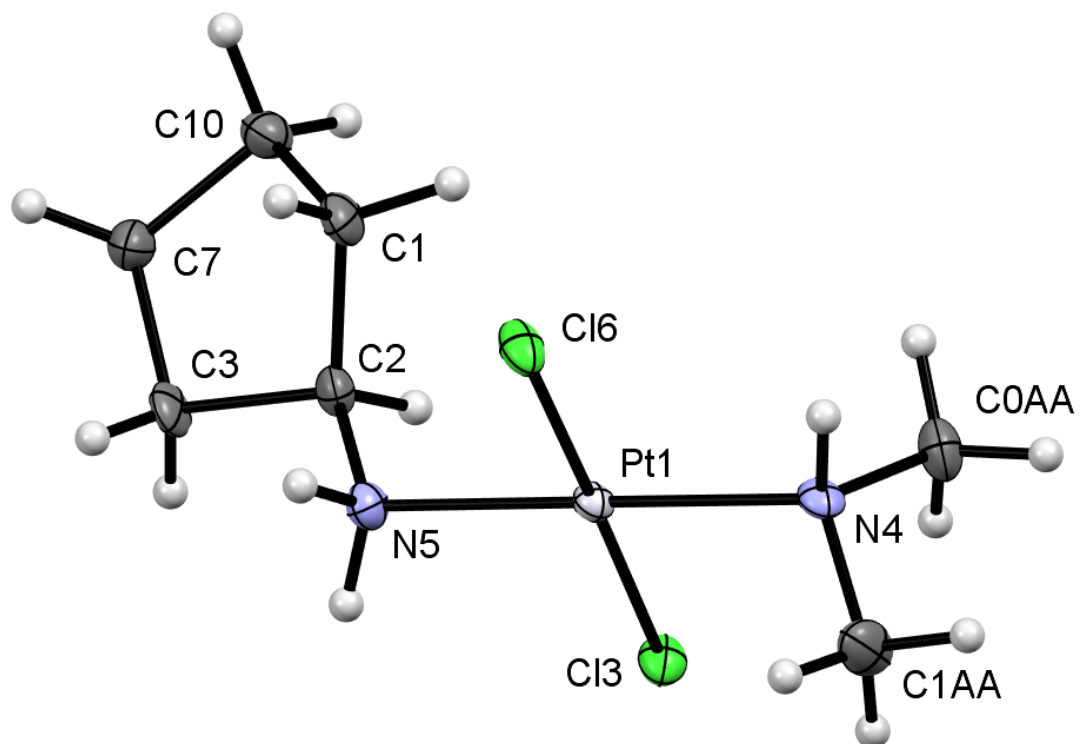

**Figure S124.** ORTEP view of complex **1e** drawn with 50% displacement ellipsoids.

**Table S7.** Overview of the sample and crystal data, data collection and structure refinement of complex **1e**.

| Identification code               | mo_kryv483_p21                                                                                |
|-----------------------------------|-----------------------------------------------------------------------------------------------|
| Empirical formula                 | C <sub>7</sub> H <sub>18</sub> Cl <sub>2</sub> N <sub>2</sub> Pt                              |
| Formula weight                    | 396.22                                                                                        |
| Temperature                       | 100 K                                                                                         |
| Wavelength                        | 0.71073 Å                                                                                     |
| Crystal system                    | Monoclinic                                                                                    |
| Space group                       | P 1 2 <sub>1</sub> 1                                                                          |
| Unit cell dimensions              | a = 9.5407(9) Å<br>b = 6.2601(6) Å<br>c = 9.6833(9) Å<br>α = 90°<br>β = 90.942(4)°<br>γ = 90° |
| Volume                            | 578.26(9) Å <sup>3</sup>                                                                      |
| Z                                 | 2                                                                                             |
| Density (calculated)              | 2.276 Mg/ m <sup>3</sup>                                                                      |
| Absorption coefficient            | 12.550 mm <sup>-1</sup>                                                                       |
| F(000)                            | 372                                                                                           |
| Crystal size                      | 0.061 x 0.032 x 0.009 mm <sup>3</sup>                                                         |
| Theta range for data collection   | 2.103 to 30.072°                                                                              |
| Index ranges                      | -13 ≤ h ≤ 13, -8 ≤ k ≤ 8, -13 ≤ l ≤ 13                                                        |
| Reflections collected             | 17378                                                                                         |
| Independent reflections           | 3383 [R(int) = 0.0636]                                                                        |
| Completeness to theta = 25.242°   | 99.9%                                                                                         |
| Absorption correction             | Semi-empirical from equivalents                                                               |
| Max. and min. transmission        | 0.6477 and 0.5479                                                                             |
| Refinement method                 | Full-matrix least-squares on F <sup>2</sup>                                                   |
| Data / restraints / parameters    | 3383 / 1 / 111                                                                                |
| Goodness-of-fit on F <sup>2</sup> | 1.043                                                                                         |
| Final R indices [I>2sigma(I)]     | R <sub>1</sub> = 0.0248, wR <sub>2</sub> = 0.0498                                             |
| R indices (all data)              | R <sub>1</sub> = 0.0285, wR <sub>2</sub> = 0.0519                                             |
| Absolute structure parameter      | -0.014(9)                                                                                     |
| Extinction coefficient            | n/a                                                                                           |
| Largest diff. peak and hole       | 0.911 and -1.030 e·Å <sup>-3</sup>                                                            |

**Table S8.** Overview of bond lengths of complex **1e**.

| Atoms   | Length [Å] | Atoms  | Length [Å] |
|---------|------------|--------|------------|
| Pt1-Cl3 | 2.2969(17) | N5-C2  | 1.490(8)   |
| Pt1-Cl6 | 2.3045(18) | C1-C2  | 1.523(13)  |
| Pt1-N4  | 2.067(6)   | C1-C10 | 1.545(10)  |
| Pt1-N5  | 2.053(6)   | C2-C3  | 1.538(10)  |
| N4-COAA | 1.491(9)   | C3-C7  | 1.557(10)  |
| N4-C1AA | 1.466(9)   | C7-C10 | 1.548(10)  |

**Table S9.** Overview of angles of complex **1e**.

| Atoms        | Angle [°] | Atoms     | Angle [°] |
|--------------|-----------|-----------|-----------|
| Cl3-Pt1-Cl6  | 178.71(6) | C2-N5-Pt1 | 114.8(4)  |
| N4-Pt1-Cl3   | 92.31(17) | C2-C1-C10 | 101.8(7)  |
| N4-Pt1-Cl6   | 88.07(17) | N5-C2-C1  | 114.1(6)  |
| N5-Pt1-Cl3   | 87.62(18) | N5-C2-C3  | 113.2(5)  |
| N5-Pt1-N4    | 179.9(3)  | C1-C2-C3  | 104.2(6)  |
| N5-Pt1-Cl6   | 92.00(18) | C2-C3-C7  | 105.0(6)  |
| COAA-N4-Pt1  | 113.6(4)  | C10-C7-C3 | 105.7(6)  |
| C1AA-N4-Pt1  | 112.4(5)  | C1-C10-C7 | 104.8(6)  |
| C1AA-N4-COAA | 111.4(6)  |           |           |

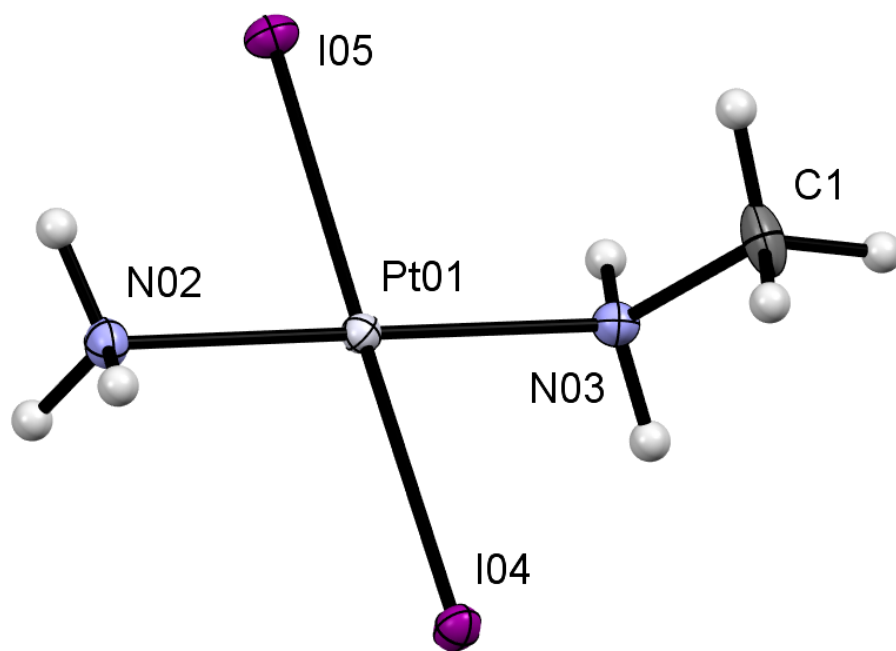

**Figure S125.** ORTEP view of complex **2a** drawn with 50% displacement ellipsoids.

**Table S10.** Overview of the sample and crystal data, data collection and structure refinement of complex **2a**.

| Identification code               | kryv465_1_p21c                                                                                      |
|-----------------------------------|-----------------------------------------------------------------------------------------------------|
| Empirical formula                 | C <sub>2</sub> H <sub>16</sub> I <sub>4</sub> N <sub>4</sub> Pt <sub>2</sub>                        |
| Formula weight                    | 993.97                                                                                              |
| Temperature                       | 100.0 K                                                                                             |
| Wavelength                        | 0.71073 Å                                                                                           |
| Crystal system                    | Monoclinic                                                                                          |
| Space group                       | P 1 2 <sub>1</sub> /c 1                                                                             |
| Unit cell dimensions              | a = 10.2120(2) Å<br>b = 13.0130(2) Å<br>c = 5.96810(10) Å<br>α = 90°<br>β = 96.6227(11)°<br>γ = 90° |
| Volume                            | 787.80(2) Å <sup>3</sup>                                                                            |
| Z                                 | 2                                                                                                   |
| Density (calculated)              | 4.190 Mg/m <sup>3</sup>                                                                             |
| Absorption coefficient            | 25.547 mm <sup>-1</sup>                                                                             |
| F(000)                            | 848                                                                                                 |
| Crystal size                      | 0.07 x 0.07 x 0.03 mm <sup>3</sup>                                                                  |
| Theta range for data collection   | 2.008 to 33.149°                                                                                    |
| Index ranges                      | -12 ≤ h ≤ 15, -20 ≤ k ≤ 19, -9 ≤ l ≤ 8                                                              |
| Reflections collected             | 15787                                                                                               |
| Independent reflections           | 2887 [R(int) = 0.0442]                                                                              |
| Completeness to theta = 25.242°   | 99.6%                                                                                               |
| Absorption correction             | Semi-empirical from equivalents                                                                     |
| Max. and min. transmission        | 0.3840 and 0.2829                                                                                   |
| Refinement method                 | Full-matrix least-squares on F <sup>2</sup>                                                         |
| Data / restraints / parameters    | 2887 / 0 / 57                                                                                       |
| Goodness-of-fit on F <sup>2</sup> | 1.050                                                                                               |
| Final R indices [I>2sigma(I)]     | R <sub>1</sub> = 0.0231, wR <sub>2</sub> = 0.0486                                                   |
| R indices (all data)              | R <sub>1</sub> = 0.0341, wR <sub>2</sub> = 0.0523                                                   |
| Extinction coefficient            | n/a                                                                                                 |
| Largest diff. peak and hole       | 2.377 and -3.196 e·Å <sup>-3</sup>                                                                  |



**Table S11.** Overview of bond lengths of complex **2a**.

| Atoms    | Length [Å] | Atoms    | Length [Å] |
|----------|------------|----------|------------|
| Pt01-N02 | 2.052(3)   | N03-H03A | 0.91       |
| Pt01-N03 | 2.052(3)   | N03-H03B | 0.91       |
| Pt01-I04 | 2.6074(2)  | N03-C1   | 1.483(5)   |
| Pt01-I05 | 2.5908(3)  | C1-H1A   | 0.98       |
| N02-H02A | 0.91       | C1-H1B   | 0.98       |
| N02-H02B | 0.91       | C1-H1C   | 0.98       |
| N02-H02C | 0.91       |          |            |

**Table S12.** Overview of angles of complex **2a**.

| Atoms         | Angle [°]  | Atoms         | Angle [°] |
|---------------|------------|---------------|-----------|
| N02-Pt01-I04  | 89.53(9)   | Pt01-N03-H03A | 108.5     |
| N02-Pt01-I05  | 90.89(9)   | Pt01-N03-H03B | 108.5     |
| N03-Pt01-N02  | 179.66(11) | H03A-N03-H03B | 107.5     |
| N03-Pt01-I04  | 90.50(8)   | C1-N03-Pt01   | 114.9(2)  |
| N03-Pt01-I05  | 89.09(8)   | C1-N03-H03A   | 108.5     |
| I05-Pt01-I04  | 178.749(8) | C1-N03-H03B   | 108.5     |
| Pt01-N02-H02A | 109.5      | N03-C1-H1A    | 109.5     |
| Pt01-N02-H02B | 109.5      | N03-C1-H1B    | 109.5     |
| Pt01-N02-H02C | 109.5      | N03-C1-H1C    | 109.5     |
| H02A-N02-H02B | 109.5      | H1A-C1-H1B    | 109.5     |
| H02A-N02-H02C | 109.5      | H1A-C1-H1C    | 109.5     |
| H02B-N02-H02C | 109.5      | H1B-C1-H1C    | 109.5     |

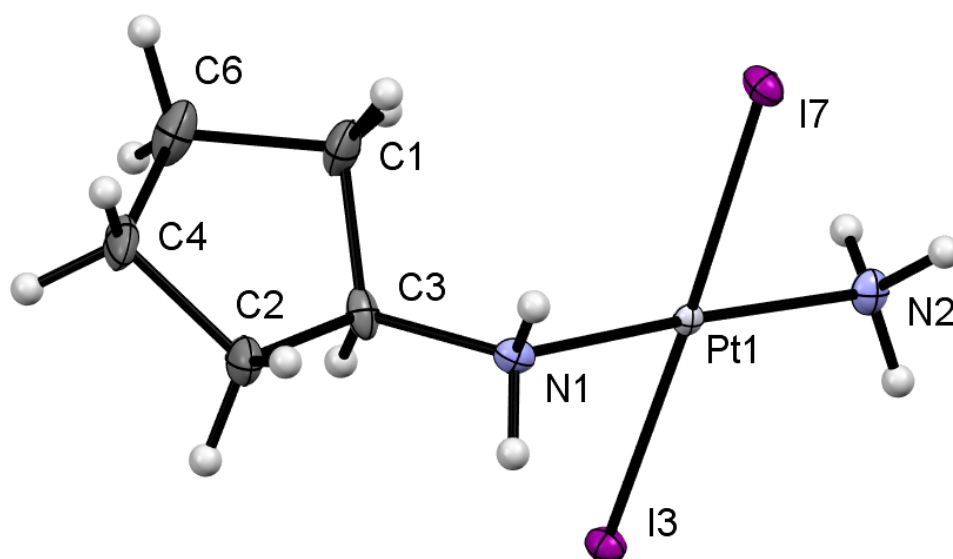

**Figure S126.** ORTEP view of complex **2c**. One of the two molecules in the asymmetric unit of complex **2c** is drawn with 50% displacement ellipsoids.

**Table S13.** Overview of the sample and crystal data, data collection and structure refinement of complex **2c**.

| Identification code               | kryv469_3_p-1                                                                                                                          |
|-----------------------------------|----------------------------------------------------------------------------------------------------------------------------------------|
| Empirical formula                 | C <sub>5</sub> H <sub>14</sub> I <sub>2</sub> N <sub>2</sub> Pt                                                                        |
| Formula weight                    | 550.58                                                                                                                                 |
| Temperature                       | 100.0 K                                                                                                                                |
| Wavelength                        | 0.71073 Å                                                                                                                              |
| Crystal system                    | Triclinic                                                                                                                              |
| Space group                       | P-1                                                                                                                                    |
| Unit cell dimensions              | a = 9.2544(2) Å<br>b = 10.3452(3) Å<br>c = 13.7550(3) Å<br>$\alpha$ = 69.6378(12)°<br>$\beta$ = 89.8550(15)°<br>$\gamma$ = 63.5008(9)° |
| Volume                            | 1086.43(5) Å <sup>3</sup>                                                                                                              |
| Z                                 | 4                                                                                                                                      |
| Density (calculated)              | 3.366 Mg/m <sup>3</sup>                                                                                                                |
| Absorption coefficient            | 18.511 mm <sup>-1</sup>                                                                                                                |
| F(000)                            | 967                                                                                                                                    |
| Crystal size                      | 0.208 x 0.194 x 0.101 mm <sup>3</sup>                                                                                                  |
| Theta range for data collection   | 2.386 to 25.734°                                                                                                                       |
| Index ranges                      | -11 ≤ h ≤ 11, -12 ≤ k ≤ 12, -16 ≤ l ≤ 16                                                                                               |
| Reflections collected             | 36297                                                                                                                                  |
| Independent reflections           | 4151 [R(int) = 0.0623]                                                                                                                 |
| Completeness to theta = 25.242°   | 99.9%                                                                                                                                  |
| Absorption correction             | Semi-empirical from equivalents                                                                                                        |
| Max. and min. transmission        | 0.5621 and 0.2987                                                                                                                      |
| Refinement method                 | Full-matrix least-squares on F <sup>2</sup>                                                                                            |
| Data / restraints / parameters    | 4151 / 0 / 186                                                                                                                         |
| Goodness-of-fit on F <sup>2</sup> | 1.185                                                                                                                                  |
| Final R indices [I>2sigma(I)]     | R <sub>1</sub> = 0.0227, wR <sub>2</sub> = 0.0572                                                                                      |
| R indices (all data)              | R <sub>1</sub> = 0.0233, wR <sub>2</sub> = 0.0575                                                                                      |
| Extinction coefficient            | 0.00267(10)                                                                                                                            |
| Largest diff. peak and hole       | 1.648 and -1.581 e.Å <sup>-3</sup>                                                                                                     |

**Table S14.** Overview of bond lengths of complex **2c**.

| Atoms    | Length [Å] | Atoms    | Length [Å] |
|----------|------------|----------|------------|
| Pt1-I3   | 2.6034(3)  | C14-H14B | 0.9900     |
| Pt1-I7   | 2.6007(3)  | C14-C16  | 1.550(7)   |
| Pt1-N1   | 2.050(4)   | C16-H16A | 0.9900     |
| Pt1-N2   | 2.055(4)   | C16-H16B | 0.9900     |
| Pt2-I4   | 2.5973(3)  | N1-H1A   | 0.9100     |
| Pt2-I5   | 2.5907(4)  | N1-H1B   | 0.9100     |
| Pt2-N3   | 2.052(4)   | N1-C3    | 1.493(6)   |
| Pt2-N6   | 2.056(4)   | N2-H2A   | 0.9100     |
| N3-H3A   | 0.9100     | N2-H2B   | 0.9100     |
| N3-H3B   | 0.9100     | N2-H2C   | 0.9100     |
| N3-C5    | 1.497(6)   | C3-H3    | 1.0000     |
| C5-H5    | 1.0000     | C3-C1    | 1.517(7)   |
| C5-C8    | 1.540(7)   | C3-C2    | 1.548(7)   |
| C5-C10   | 1.537(7)   | C1-H1C   | 0.9900     |
| N6-H6C   | 0.9100     | C1-H1D   | 0.9900     |
| N6-H6D   | 0.9100     | C1-C6    | 1.530(7)   |
| N6-H6E   | 0.9100     | C2-H2D   | 0.9900     |
| C8-H8A   | 0.9900     | C2-H2E   | 0.9900     |
| C8-H8B   | 0.9900     | C2-C4    | 1.550(7)   |
| C8-C14   | 1.534(7)   | C4-H4A   | 0.9900     |
| C10-H10A | 0.9900     | C4-H4B   | 0.9900     |
| C10-H10B | 0.9900     | C4-C6    | 1.524(8)   |
| C10-C16  | 1.530(7)   | C6-H6A   | 0.9900     |
| C14-H14A | 0.9900     | C6-H6B   | 0.9900     |

**Table S15.** Overview of angles of complex **2c**.

| Atoms      | Angle [°]   | Atoms         | Angle [°] |
|------------|-------------|---------------|-----------|
| I7-Pt1-I3  | 177.248(12) | C10-C16-C14   | 104.3(4)  |
| N1-Pt1-I3  | 89.57(11)   | C10-C16-H16A  | 110.9     |
| N1-Pt1-I7  | 90.60(11)   | C10-C16-H16B  | 110.9     |
| N1-Pt1-N2  | 176.63(16)  | C14-C16-H16A  | 110.9     |
| N2-Pt1-I3  | 90.15(12)   | C14-C16-H16B  | 110.9     |
| N2-Pt1-I7  | 89.85(12)   | H16A-C16-H16B | 108.9     |
| I5-Pt2-I4  | 178.125(12) | Pt1-N1-H1A    | 107.5     |
| N3-Pt2-I4  | 89.58(11)   | Pt1-N1-H1B    | 107.5     |
| N3-Pt2-I5  | 90.31(11)   | H1A-N1-H1B    | 107       |
| N3-Pt2-N6  | 178.94(16)  | C3-N1-Pt1     | 119.3(3)  |
| N6-Pt2-I4  | 90.49(12)   | C3-N1-H1A     | 107.5     |
| N6-Pt2-I5  | 89.66(12)   | C3-N1-H1B     | 107.5     |
| Pt2-N3-H3A | 108         | Pt1-N2-H2A    | 109.5     |
| Pt2-N3-H3B | 108         | Pt1-N2-H2B    | 109.5     |
| H3A-N3-H3B | 107.2       | Pt1-N2-H2C    | 109.5     |
| C5-N3-Pt2  | 117.3(3)    | H2A-N2-H2B    | 109.5     |
| C5-N3-H3A  | 108         | H2A-N2-H2C    | 109.5     |
| C5-N3-H3B  | 108         | H2B-N2-H2C    | 109.5     |
| N3-C5-H5   | 108.7       | N1-C3-H3      | 109       |
| N3-C5-C8   | 112.7(4)    | N1-C3-C1      | 113.1(4)  |
| N3-C5-C10  | 113.7(4)    | N1-C3-C2      | 112.1(4)  |
| C8-C5-H5   | 108.7       | C1-C3-H3      | 109       |
| C10-C5-H5  | 108.7       | C1-C3-C2      | 104.5(4)  |
| C10-C5-C8  | 104.3(4)    | C2-C3-H3      | 109       |
| Pt2-N6-H6C | 109.5       | C3-C1-H1C     | 111.4     |
| Pt2-N6-H6D | 109.5       | C3-C1-H1D     | 111.4     |
| Pt2-N6-H6E | 109.5       | C3-C1-C6      | 102.0(4)  |
| H6C-N6-H6D | 109.5       | H1C-C1-H1D    | 109.2     |
| H6C-N6-H6E | 109.5       | C6-C1-H1C     | 111.4     |
| H6D-N6-H6E | 109.5       | C6-C1-H1D     | 111.4     |
| C5-C8-H8A  | 110.5       | C3-C2-H2D     | 110.8     |
| C5-C8-H8B  | 110.5       | C3-C2-H2E     | 110.8     |
| H8A-C8-H8B | 108.7       | C3-C2-C4      | 104.9(4)  |
| C14-C8-C5  | 106.3(4)    | H2D-C2-H2E    | 108.8     |

| Atoms         | Angle [°] | Atoms      | Angle [°] |
|---------------|-----------|------------|-----------|
| C14-C8-H8A    | 110.5     | C4-C2-H2D  | 110.8     |
| C14-C8-H8B    | 110.5     | C4-C2-H2E  | 110.8     |
| C5-C10-H10A   | 111.6     | C2-C4-H4A  | 110.5     |
| C5-C10-H10B   | 111.6     | C2-C4-H4B  | 110.5     |
| H10A-C10-H10B | 109.4     | H4A-C4-H4B | 108.7     |
| C16-C10-C5    | 100.9(4)  | C6-C4-C2   | 106.0(4)  |
| C16-C10-H10A  | 111.6     | C6-C4-H4A  | 110.5     |
| C16-C10-H10B  | 111.6     | C6-C4-H4B  | 110.5     |
| C8-C14-H14A   | 110.8     | C1-C6-H6A  | 110.8     |
| C8-C14-H14B   | 110.8     | C1-C6-H6B  | 110.8     |
| C8-C14-C16    | 104.9(4)  | C4-C6-C1   | 104.8(4)  |
| H14A-C14-H14B | 108.8     | C4-C6-H6A  | 110.8     |
| C16-C14-H14A  | 110.8     | C4-C6-H6B  | 110.8     |
| C16-C14-H14B  | 110.8     | H6A-C6-H6B | 108.9     |

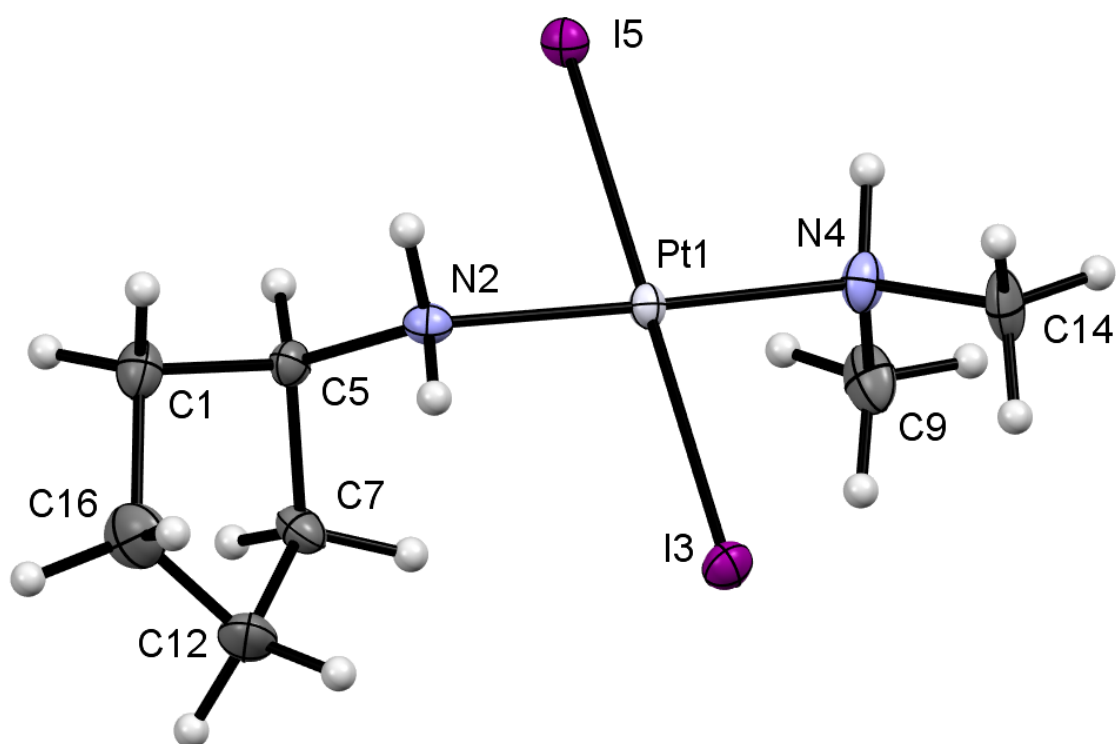

**Figure S127.** ORTEP view of complex **2e**. One of the two molecules in the asymmetric unit of complex **2e** is drawn with 50% displacement ellipsoids.

**Table S16.** Overview of the sample and crystal data, data collection and structure refinement of complex **2e**.

| Identification code               | kryv687_p21c                                                                                       |
|-----------------------------------|----------------------------------------------------------------------------------------------------|
| Empirical formula                 | C <sub>7</sub> H <sub>18</sub> I <sub>2</sub> N <sub>2</sub> Pt                                    |
| Formula weight                    | 579.12                                                                                             |
| Temperature                       | 100.0 K                                                                                            |
| Wavelength                        | 0.71073 Å                                                                                          |
| Crystal system                    | Monoclinic                                                                                         |
| Space group                       | P 1 2 <sub>1</sub> /c 1                                                                            |
| Unit cell dimensions              | a = 15.1132(5) Å<br>b = 10.8253(3) Å<br>c = 16.0145(5) Å<br>α = 90°<br>β = 93.2005(14)°<br>γ = 90° |
| Volume                            | 2615.96(14) Å <sup>3</sup>                                                                         |
| Z                                 | 8                                                                                                  |
| Density (calculated)              | 2.941 Mg/m <sup>3</sup>                                                                            |
| Absorption coefficient            | 15.410 mm <sup>-1</sup>                                                                            |
| F(000)                            | 2064                                                                                               |
| Crystal size                      | 0.176 x 0.148 x 0.118 mm <sup>3</sup>                                                              |
| Theta range for data collection   | 2.272 to 25.715°                                                                                   |
| Index ranges                      | -18 ≤ h ≤ 18, -12 ≤ k ≤ 13, -18 ≤ l ≤ 19                                                           |
| Reflections collected             | 26249                                                                                              |
| Independent reflections           | 4988 [R(int) = 0.0508]                                                                             |
| Completeness to theta = 25.242°   | 99.9%                                                                                              |
| Absorption correction             | Semi-empirical from equivalents                                                                    |
| Max. and min. transmission        | 0.5621 and 0.3668                                                                                  |
| Refinement method                 | Full-matrix least-squares on F <sup>2</sup>                                                        |
| Data / restraints / parameters    | 4988 / 0 / 222                                                                                     |
| Goodness-of-fit on F <sup>2</sup> | 1.052                                                                                              |
| Final R indices [I>2σ(I)]         | R <sub>1</sub> = 0.0193, wR <sub>2</sub> = 0.0430                                                  |
| R indices (all data)              | R <sub>1</sub> = 0.0217, wR <sub>2</sub> = 0.0437                                                  |
| Extinction coefficient            | 0.00048(2)                                                                                         |
| Largest diff. peak and hole       | 1.530 and -1.140 e·Å <sup>-3</sup>                                                                 |



**Table S17.** Overview of bond lengths of complex **2e**.

| Atoms  | Length [Å] | Atoms    | Length [Å] |
|--------|------------|----------|------------|
| Pt1-I3 | 2.6075(3)  | C8-H8A   | 0.98       |
| Pt1-I5 | 2.6020(3)  | C8-H8B   | 0.98       |
| Pt1-N2 | 2.060(3)   | C8-H8C   | 0.98       |
| Pt1-N4 | 2.070(3)   | C9-H9A   | 0.98       |
| Pt2-I4 | 2.6002(3)  | C9-H9B   | 0.98       |
| Pt2-I6 | 2.6091(3)  | C9-H9C   | 0.98       |
| Pt2-N1 | 2.062(3)   | C10-H10A | 0.98       |
| Pt2-N3 | 2.069(3)   | C10-H10B | 0.98       |
| N1-H1C | 0.91       | C10-H10C | 0.98       |
| N1-H1D | 0.91       | C12-H12A | 0.99       |
| N1-C17 | 1.476(5)   | C12-H12B | 0.99       |
| N2-H2A | 0.91       | C12-C16  | 1.543(6)   |
| N2-H2B | 0.91       | C13-H13A | 0.99       |
| N2-C5  | 1.491(5)   | C13-H13B | 0.99       |
| N3-H3  | 1          | C13-C15  | 1.524(6)   |
| N3-C8  | 1.478(5)   | C14-H14A | 0.98       |
| N3-C10 | 1.480(5)   | C14-H14B | 0.98       |
| N4-H4  | 1          | C14-H14C | 0.98       |
| N4-C9  | 1.474(5)   | C15-H15A | 0.99       |
| N4-C14 | 1.468(5)   | C15-H15B | 0.99       |
| C5-H5  | 1          | C15-C17  | 1.514(6)   |
| C5-C7  | 1.518(5)   | C16-H16A | 0.99       |
| C5-C1  | 1.536(5)   | C16-H16B | 0.99       |
| C6-H6A | 0.99       | C16-C1   | 1.532(7)   |
| C6-H6B | 0.99       | C17-H17  | 1          |
| C6-C13 | 1.526(6)   | C17-C18  | 1.541(6)   |
| C6-C18 | 1.527(6)   | C18-H18A | 0.99       |
| C7-H7A | 0.99       | C18-H18B | 0.99       |
| C7-H7B | 0.99       | C1-H1A   | 0.99       |
| C7-C12 | 1.532(6)   | C1-H1B   | 0.99       |

**Table S18.** Overview of angles of complex **2e**.

| Atoms      | Angle [°]   | Atoms         | Angle [°] |
|------------|-------------|---------------|-----------|
| I5-Pt1-I3  | 177.795(10) | N4-C9-H9A     | 109.5     |
| N2-Pt1-I3  | 88.75(10)   | N4-C9-H9B     | 109.5     |
| N2-Pt1-I5  | 90.07(10)   | N4-C9-H9C     | 109.5     |
| N2-Pt1-N4  | 177.29(14)  | H9A-C9-H9B    | 109.5     |
| N4-Pt1-I3  | 93.67(10)   | H9A-C9-H9C    | 109.5     |
| N4-Pt1-I5  | 87.55(10)   | H9B-C9-H9C    | 109.5     |
| I4-Pt2-I6  | 178.322(10) | N3-C10-H10A   | 109.5     |
| N1-Pt2-I4  | 90.12(10)   | N3-C10-H10B   | 109.5     |
| N1-Pt2-I6  | 88.29(10)   | N3-C10-H10C   | 109.5     |
| N1-Pt2-N3  | 176.81(14)  | H10A-C10-H10B | 109.5     |
| N3-Pt2-I4  | 87.44(10)   | H10A-C10-H10C | 109.5     |
| N3-Pt2-I6  | 94.13(10)   | H10B-C10-H10C | 109.5     |
| Pt2-N1-H1C | 107.8       | C7-C12-H12A   | 110.6     |
| Pt2-N1-H1D | 107.8       | C7-C12-H12B   | 110.6     |
| H1C-N1-H1D | 107.1       | C7-C12-C16    | 105.5(4)  |
| C17-N1-Pt2 | 118.0(2)    | H12A-C12-H12B | 108.8     |
| C17-N1-H1C | 107.8       | C16-C12-H12A  | 110.6     |
| C17-N1-H1D | 107.8       | C16-C12-H12B  | 110.6     |
| Pt1-N2-H2A | 107.5       | C6-C13-H13A   | 111       |
| Pt1-N2-H2B | 107.5       | C6-C13-H13B   | 111       |
| H2A-N2-H2B | 107         | H13A-C13-H13B | 109       |
| C5-N2-Pt1  | 119.2(2)    | C15-C13-C6    | 103.6(4)  |
| C5-N2-H2A  | 107.5       | C15-C13-H13A  | 111       |
| C5-N2-H2B  | 107.5       | C15-C13-H13B  | 111       |
| Pt2-N3-H3  | 105.6       | N4-C14-H14A   | 109.5     |
| C8-N3-Pt2  | 117.9(3)    | N4-C14-H14B   | 109.5     |
| C8-N3-H3   | 105.6       | N4-C14-H14C   | 109.5     |
| C8-N3-C10  | 110.4(3)    | H14A-C14-H14B | 109.5     |
| C10-N3-Pt2 | 110.8(3)    | H14A-C14-H14C | 109.5     |
| C10-N3-H3  | 105.6       | H14B-C14-H14C | 109.5     |
| Pt1-N4-H4  | 105.6       | C13-C15-H15A  | 111       |
| C9-N4-Pt1  | 111.0(3)    | C13-C15-H15B  | 111       |
| C9-N4-H4   | 105.6       | H15A-C15-H15B | 109       |
| C14-N4-Pt1 | 117.9(3)    | C17-C15-C13   | 103.6(4)  |

| Atoms      | Angle [°] | Atoms         | Angle [°] |
|------------|-----------|---------------|-----------|
| C14-N4-H4  | 105.6     | C17-C15-H15A  | 111       |
| C14-N4-C9  | 110.3(3)  | C17-C15-H15B  | 111       |
| N2-C5-H5   | 110.6     | C12-C16-H16A  | 110.5     |
| N2-C5-C7   | 111.8(3)  | C12-C16-H16B  | 110.5     |
| N2-C5-C1   | 110.2(3)  | H16A-C16-H16B | 108.6     |
| C7-C5-H5   | 110.6     | C1-C16-C12    | 106.4(4)  |
| C7-C5-C1   | 102.8(3)  | C1-C16-H16A   | 110.5     |
| C1-C5-H5   | 110.6     | C1-C16-H16B   | 110.5     |
| H6A-C6-H6B | 108.8     | N1-C17-C15    | 113.4(4)  |
| C13-C6-H6A | 110.7     | N1-C17-H17    | 108.7     |
| C13-C6-H6B | 110.7     | N1-C17-C18    | 112.5(4)  |
| C13-C6-C18 | 105.3(3)  | C15-C17-H17   | 108.7     |
| C18-C6-H6A | 110.7     | C15-C17-C18   | 104.9(4)  |
| C18-C6-H6B | 110.7     | C18-C17-H17   | 108.7     |
| C5-C7-H7A  | 110.7     | C6-C18-C17    | 106.7(4)  |
| C5-C7-H7B  | 110.7     | C6-C18-H18A   | 110.4     |
| C5-C7-C12  | 105.3(4)  | C6-C18-H18B   | 110.4     |
| H7A-C7-H7B | 108.8     | C17-C18-H18A  | 110.4     |
| C12-C7-H7A | 110.7     | C17-C18-H18B  | 110.4     |
| C12-C7-H7B | 110.7     | H18A-C18-H18B | 108.6     |
| N3-C8-H8A  | 109.5     | C5-C1-H1A     | 110.7     |
| N3-C8-H8B  | 109.5     | C5-C1-H1B     | 110.7     |
| N3-C8-H8C  | 109.5     | C16-C1-C5     | 105.4(3)  |
| H8A-C8-H8B | 109.5     | C16-C1-H1A    | 110.7     |
| H8A-C8-H8C | 109.5     | C16-C1-H1B    | 110.7     |
| H8B-C8-H8C | 109.5     | H1A-C1-H1B    | 108.8     |

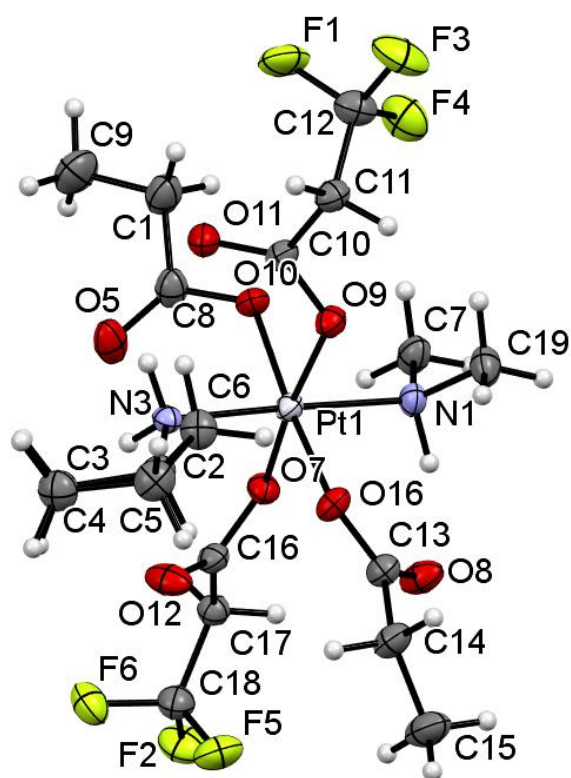

**Figure S128.** ORTEP view of complex **12e**. One of the two molecules in the asymmetric unit of complex **12e** is drawn with 50% displacement ellipsoids.

**Table S19.** Overview of the sample and crystal data, data collection and structure refinement of complex **12e**.

| Identification code               | kryv668_b                                                                                     |
|-----------------------------------|-----------------------------------------------------------------------------------------------|
| Empirical formula                 | C <sub>19</sub> H <sub>31</sub> F <sub>6</sub> N <sub>2</sub> O <sub>8</sub> Pt               |
| Formula weight                    | 724.55                                                                                        |
| Temperature                       | 100 K                                                                                         |
| Wavelength                        | 1.54186 Å                                                                                     |
| Crystal system                    | Monoclinic                                                                                    |
| Space group                       | P 1 2 <sub>1</sub> /n 1                                                                       |
| Unit cell dimensions              | a = 23.408(5) Å<br>b = 9.4904(19) Å<br>c = 23.714(5) Å<br>α = 90°<br>β = 99.87(3)°<br>γ = 90° |
| Volume                            | 5190.3(19) Å <sup>3</sup>                                                                     |
| Z                                 | 8                                                                                             |
| Density (calculated)              | 1.854 Mg/m <sup>3</sup>                                                                       |
| Absorption coefficient            | 10.927 mm <sup>-1</sup>                                                                       |
| F(000)                            | 2840                                                                                          |
| Crystal size                      | 0.180 x 0.110 x 0.050 mm <sup>3</sup>                                                         |
| Theta range for data collection   | 2.45 to 72.25°                                                                                |
| Index ranges                      | -26 ≤ h ≤ 28, -10 ≤ k ≤ 11, -27 ≤ l ≤ 5                                                       |
| Reflections collected             | 41577                                                                                         |
| Independent reflections           | 9605 [R(int) = 0.0524]                                                                        |
| Completeness to theta = 67.679°   | 95.4%                                                                                         |
| Absorption correction             | Semi-empirical from equivalents                                                               |
| Max. and min. transmission        | 0.9366 and 0.8772                                                                             |
| Refinement method                 | Full-matrix least-squares on F <sup>2</sup>                                                   |
| Data / restraints / parameters    | 9605 / 1057 / 694                                                                             |
| Goodness-of-fit on F <sup>2</sup> | 1.033                                                                                         |
| Final R indices [I>2sigma(I)]     | R <sub>1</sub> = 0.0524, wR <sub>2</sub> = 0.1448                                             |
| R indices (all data)              | R <sub>1</sub> = 0.0576, wR <sub>2</sub> = 0.1511                                             |
| Extinction coefficient            | n/a                                                                                           |
| Largest diff. peak and hole       | 4.649 and -2.377 e·Å <sup>-3</sup>                                                            |

**Table S20.** Overview of bond lengths of complex **12e**.

| Atoms   | Length [Å] | Atoms    | Length [Å] |
|---------|------------|----------|------------|
| Pt1-O7  | 2.010(4)   | C7-H7C   | 0.98       |
| Pt1-O9  | 2.002(4)   | C9-H9A   | 0.98       |
| Pt1-O10 | 1.993(4)   | C9-H9B   | 0.98       |
| Pt1-O16 | 1.999(5)   | C9-H9C   | 0.98       |
| Pt1-N1  | 2.084(5)   | C10-C11  | 1.523(9)   |
| Pt1-N3  | 2.071(5)   | C11-H11A | 0.99       |
| Pt2-O1  | 2.020(5)   | C11-H11B | 0.99       |
| Pt2-O2  | 2.009(5)   | C11-C12  | 1.500(10)  |
| Pt2-O3  | 1.994(5)   | C13-C14  | 1.511(10)  |
| Pt2-O6  | 1.998(5)   | C14-H14A | 0.99       |
| Pt2-N2  | 2.052(6)   | C14-H14B | 0.99       |
| Pt2-N5  | 2.082(7)   | C14-C15  | 1.518(11)  |
| F1-C12  | 1.336(10)  | C15-H15A | 0.98       |
| F2-C18  | 1.333(9)   | C15-H15B | 0.98       |
| F3-C12  | 1.331(9)   | C15-H15C | 0.98       |
| F4-C12  | 1.329(9)   | C16-C17  | 1.519(9)   |
| F5-C18  | 1.337(9)   | C17-H17A | 0.99       |
| F6-C18  | 1.341(9)   | C17-H17B | 0.99       |
| F8-C37  | 1.305(12)  | C17-C18  | 1.497(9)   |
| F11-C37 | 1.341(11)  | C19-H19A | 0.98       |
| F12-C37 | 1.340(13)  | C19-H19B | 0.98       |
| O1-C35  | 1.275(9)   | C19-H19C | 0.98       |
| O2-C32  | 1.290(10)  | C20-H20  | 1          |
| O3-C29  | 1.312(9)   | C20-C21  | 1.521(13)  |
| O4-C35  | 1.236(9)   | C20-C24  | 1.512(12)  |
| O5-C8   | 1.219(8)   | C21-H21A | 0.99       |
| O6-C26  | 1.270(9)   | C21-H21B | 0.99       |
| O7-C16  | 1.293(8)   | C21-C22  | 1.509(16)  |
| O8-C13  | 1.225(9)   | C22-H22A | 0.99       |
| O9-C10  | 1.298(8)   | C22-H22B | 0.99       |
| O10-C8  | 1.302(8)   | C22-C23  | 1.502(19)  |
| O11-C10 | 1.225(8)   | C23-H23A | 0.99       |
| O12-C16 | 1.210(8)   | C23-H23B | 0.99       |
| O13-C26 | 1.239(9)   | C23-C24  | 1.514(15)  |

| Atoms   | Length [Å] | Atoms    | Length [Å] |
|---------|------------|----------|------------|
| O14-C29 | 1.208(10)  | C24-H24A | 0.99       |
| O15-C32 | 1.239(10)  | C24-H24B | 0.99       |
| O16-C13 | 1.294(8)   | C25-H25A | 0.98       |
| N1-H1   | 1          | C25-H25B | 0.98       |
| N1-C7   | 1.454(9)   | C25-H25C | 0.98       |
| N1-C19  | 1.484(9)   | C26-C27  | 1.533(10)  |
| N2-H2A  | 0.91       | C27-C28  | 1.489(13)  |
| N2-H2B  | 0.91       | C27-C1A  | 1.41(6)    |
| N2-C20  | 1.477(9)   | C28-F7   | 1.346(10)  |
| N3-H3A  | 0.91       | C28-F9   | 1.351(9)   |
| N3-H3B  | 0.91       | C28-F10  | 1.339(10)  |
| N3-C2   | 1.488(8)   | C1A-F13  | 1.58(8)    |
| N5-H5   | 1          | C1A-F14  | 1.23(7)    |
| N5-C25  | 1.433(10)  | C1A-F15  | 1.39(7)    |
| N5-C38  | 1.425(11)  | C29-C30  | 1.505(12)  |
| C1-H1A  | 0.99       | C30-H30A | 0.99       |
| C1-H1B  | 0.99       | C30-H30B | 0.99       |
| C1-C8   | 1.506(10)  | C30-C31  | 1.518(14)  |
| C1-C9   | 1.477(11)  | C31-H31A | 0.98       |
| C2-H2   | 1          | C31-H31B | 0.98       |
| C2-C3   | 1.529(9)   | C31-H31C | 0.98       |
| C2-C6   | 1.506(9)   | C32-C33  | 1.528(11)  |
| C3-H3C  | 0.99       | C33-H33A | 0.99       |
| C3-H3D  | 0.99       | C33-H33B | 0.99       |
| C3-C4   | 1.539(10)  | C33-C34  | 1.456(14)  |
| C4-H4A  | 0.99       | C34-H34A | 0.98       |
| C4-H4B  | 0.99       | C34-H34B | 0.98       |
| C4-C5   | 1.525(10)  | C34-H34C | 0.98       |
| C5-H5A  | 0.99       | C35-C36  | 1.495(10)  |
| C5-H5B  | 0.99       | C36-H36A | 0.99       |
| C5-C6   | 1.514(10)  | C36-H36B | 0.99       |
| C6-H6A  | 0.99       | C36-C37  | 1.485(11)  |
| C6-H6B  | 0.99       | C38-H38A | 0.98       |
| C7-H7A  | 0.98       | C38-H38B | 0.98       |
| C7-H7B  | 0.98       | C38-H38C | 0.98       |

**Table S21.** Overview of angles of complex **12e**.

| Atoms       | Angle [°]  | Atoms         | Angle [°] |
|-------------|------------|---------------|-----------|
| O7-Pt1-N1   | 81.6(2)    | H14A-C14-H14B | 107.6     |
| O7-Pt1-N3   | 97.32(19)  | C15-C14-H14A  | 108.7     |
| O9-Pt1-O7   | 171.98(18) | C15-C14-H14B  | 108.7     |
| O9-Pt1-N1   | 90.5(2)    | C14-C15-H15A  | 109.5     |
| O9-Pt1-N3   | 90.60(19)  | C14-C15-H15B  | 109.5     |
| O10-Pt1-O7  | 90.27(19)  | C14-C15-H15C  | 109.5     |
| O10-Pt1-O9  | 87.88(19)  | H15A-C15-H15B | 109.5     |
| O10-Pt1-O16 | 174.32(19) | H15A-C15-H15C | 109.5     |
| O10-Pt1-N1  | 87.4(2)    | H15B-C15-H15C | 109.5     |
| O10-Pt1-N3  | 94.1(2)    | O7-C16-C17    | 110.0(5)  |
| O16-Pt1-O7  | 94.95(19)  | O12-C16-O7    | 126.7(6)  |
| O16-Pt1-O9  | 86.64(19)  | O12-C16-C17   | 123.2(6)  |
| O16-Pt1-N1  | 91.2(2)    | C16-C17-H17A  | 108.6     |
| O16-Pt1-N3  | 87.5(2)    | C16-C17-H17B  | 108.6     |
| N3-Pt1-N1   | 178.2(2)   | H17A-C17-H17B | 107.6     |
| O1-Pt2-N2   | 94.9(2)    | C18-C17-C16   | 114.7(6)  |
| O1-Pt2-N5   | 88.7(3)    | C18-C17-H17A  | 108.6     |
| O2-Pt2-O1   | 82.3(2)    | C18-C17-H17B  | 108.6     |
| O2-Pt2-N2   | 85.2(2)    | F2-C18-F5     | 107.0(6)  |
| O2-Pt2-N5   | 92.6(3)    | F2-C18-F6     | 107.0(6)  |
| O3-Pt2-O1   | 97.2(2)    | F2-C18-C17    | 110.9(6)  |
| O3-Pt2-O2   | 171.7(2)   | F5-C18-F6     | 105.9(6)  |
| O3-Pt2-O6   | 83.9(2)    | F5-C18-C17    | 112.6(6)  |
| O3-Pt2-N2   | 86.6(2)    | F6-C18-C17    | 113.1(6)  |
| O3-Pt2-N5   | 95.7(3)    | N1-C19-H19A   | 109.5     |
| O6-Pt2-O1   | 173.5(2)   | N1-C19-H19B   | 109.5     |
| O6-Pt2-O2   | 97.5(2)    | N1-C19-H19C   | 109.5     |
| O6-Pt2-N2   | 91.5(2)    | H19A-C19-H19B | 109.5     |
| O6-Pt2-N5   | 84.8(3)    | H19A-C19-H19C | 109.5     |
| N2-Pt2-N5   | 175.4(3)   | H19B-C19-H19C | 109.5     |
| C35-O1-Pt2  | 124.9(5)   | N2-C20-H20    | 107.3     |
| C32-O2-Pt2  | 124.4(5)   | N2-C20-C21    | 114.9(8)  |
| C29-O3-Pt2  | 123.6(5)   | N2-C20-C24    | 113.9(7)  |
| C26-O6-Pt2  | 124.5(4)   | C21-C20-H20   | 107.3     |
| C16-O7-Pt1  | 122.8(4)   | C24-C20-H20   | 107.3     |



| Atoms       | Angle [°] | Atoms         | Angle [°] |
|-------------|-----------|---------------|-----------|
| C10-O9-Pt1  | 122.3(4)  | C24-C20-C21   | 105.8(8)  |
| C8-O10-Pt1  | 124.2(4)  | C20-C21-H21A  | 110.4     |
| C13-O16-Pt1 | 125.3(4)  | C20-C21-H21B  | 110.4     |
| Pt1-N1-H1   | 104.9     | H21A-C21-H21B | 108.6     |
| C7-N1-Pt1   | 116.0(4)  | C22-C21-C20   | 106.6(10) |
| C7-N1-H1    | 104.9     | C22-C21-H21A  | 110.4     |
| C7-N1-C19   | 110.9(5)  | C22-C21-H21B  | 110.4     |
| C19-N1-Pt1  | 113.8(4)  | C21-C22-H22A  | 111.1     |
| C19-N1-H1   | 104.9     | C21-C22-H22B  | 111.1     |
| Pt2-N2-H2A  | 107.5     | H22A-C22-H22B | 109.1     |
| Pt2-N2-H2B  | 107.5     | C23-C22-C21   | 103.1(10) |
| H2A-N2-H2B  | 107       | C23-C22-H22A  | 111.1     |
| C20-N2-Pt2  | 119.5(5)  | C23-C22-H22B  | 111.1     |
| C20-N2-H2A  | 107.5     | C22-C23-H23A  | 111.1     |
| C20-N2-H2B  | 107.5     | C22-C23-H23B  | 111.1     |
| Pt1-N3-H3A  | 107.2     | C22-C23-C24   | 103.4(9)  |
| Pt1-N3-H3B  | 107.2     | H23A-C23-H23B | 109       |
| H3A-N3-H3B  | 106.8     | C24-C23-H23A  | 111.1     |
| C2-N3-Pt1   | 120.5(4)  | C24-C23-H23B  | 111.1     |
| C2-N3-H3A   | 107.2     | C20-C24-C23   | 101.7(8)  |
| C2-N3-H3B   | 107.2     | C20-C24-H24A  | 111.4     |
| Pt2-N5-H5   | 98.4      | C20-C24-H24B  | 111.4     |
| C25-N5-Pt2  | 116.9(5)  | C23-C24-H24A  | 111.4     |
| C25-N5-H5   | 98.4      | C23-C24-H24B  | 111.4     |
| C38-N5-Pt2  | 117.9(5)  | H24A-C24-H24B | 109.3     |
| C38-N5-H5   | 98.4      | N5-C25-H25A   | 109.5     |
| C38-N5-C25  | 119.0(7)  | N5-C25-H25B   | 109.5     |
| H1A-C1-H1B  | 107.5     | N5-C25-H25C   | 109.5     |
| C8-C1-H1A   | 108.6     | H25A-C25-H25B | 109.5     |
| C8-C1-H1B   | 108.6     | H25A-C25-H25C | 109.5     |
| C9-C1-H1A   | 108.6     | H25B-C25-H25C | 109.5     |
| C9-C1-H1B   | 108.6     | O6-C26-C27    | 113.7(6)  |
| C9-C1-C8    | 114.9(7)  | O13-C26-O6    | 126.7(7)  |
| N3-C2-H2    | 108.5     | O13-C26-C27   | 119.5(7)  |
| N3-C2-C3    | 111.4(5)  | C28-C27-C26   | 111.5(7)  |

| Atoms      | Angle [°] | Atoms         | Angle [°] |
|------------|-----------|---------------|-----------|
| N3-C2-C6   | 114.6(5)  | C1A-C27-C26   | 130(3)    |
| C3-C2-H2   | 108.5     | F7-C28-C27    | 114.8(8)  |
| C6-C2-H2   | 108.5     | F7-C28-F9     | 104.7(7)  |
| C6-C2-C3   | 105.1(6)  | F9-C28-C27    | 110.5(8)  |
| C2-C3-H3C  | 110.7     | F10-C28-C27   | 113.4(7)  |
| C2-C3-H3D  | 110.7     | F10-C28-F7    | 106.5(8)  |
| C2-C3-C4   | 105.3(6)  | F10-C28-F9    | 106.2(8)  |
| H3C-C3-H3D | 108.8     | C27-C1A-F13   | 104(4)    |
| C4-C3-H3C  | 110.7     | F14-C1A-C27   | 125(6)    |
| C4-C3-H3D  | 110.7     | F14-C1A-F13   | 106(5)    |
| C3-C4-H4A  | 110.6     | F14-C1A-F15   | 117(5)    |
| C3-C4-H4B  | 110.6     | F15-C1A-C27   | 107(4)    |
| H4A-C4-H4B | 108.8     | F15-C1A-F13   | 92(5)     |
| C5-C4-C3   | 105.5(6)  | O3-C29-C30    | 113.2(8)  |
| C5-C4-H4A  | 110.6     | O14-C29-O3    | 124.8(7)  |
| C5-C4-H4B  | 110.6     | O14-C29-C30   | 122.1(7)  |
| C4-C5-H5A  | 110.9     | C29-C30-H30A  | 109.5     |
| C4-C5-H5B  | 110.9     | C29-C30-H30B  | 109.5     |
| H5A-C5-H5B | 108.9     | C29-C30-C31   | 110.8(8)  |
| C6-C5-C4   | 104.4(6)  | H30A-C30-H30B | 108.1     |
| C6-C5-H5A  | 110.9     | C31-C30-H30A  | 109.5     |
| C6-C5-H5B  | 110.9     | C31-C30-H30B  | 109.5     |
| C2-C6-C5   | 102.1(6)  | C30-C31-H31A  | 109.5     |
| C2-C6-H6A  | 111.3     | C30-C31-H31B  | 109.5     |
| C2-C6-H6B  | 111.3     | C30-C31-H31C  | 109.5     |
| C5-C6-H6A  | 111.3     | H31A-C31-H31B | 109.5     |
| C5-C6-H6B  | 111.3     | H31A-C31-H31C | 109.5     |
| H6A-C6-H6B | 109.2     | H31B-C31-H31C | 109.5     |
| N1-C7-H7A  | 109.5     | O2-C32-C33    | 112.8(7)  |
| N1-C7-H7B  | 109.5     | O15-C32-O2    | 124.6(7)  |
| N1-C7-H7C  | 109.5     | O15-C32-C33   | 122.5(7)  |
| H7A-C7-H7B | 109.5     | C32-C33-H33A  | 108.4     |
| H7A-C7-H7C | 109.5     | C32-C33-H33B  | 108.4     |
| H7B-C7-H7C | 109.5     | H33A-C33-H33B | 107.5     |
| O5-C8-O10  | 125.0(7)  | C34-C33-C32   | 115.4(8)  |

| Atoms         | Angle [°] | Atoms         | Angle [°] |
|---------------|-----------|---------------|-----------|
| O5-C8-C1      | 125.1(6)  | C34-C33-H33A  | 108.4     |
| O10-C8-C1     | 109.8(6)  | C34-C33-H33B  | 108.4     |
| C1-C9-H9A     | 109.5     | C33-C34-H34A  | 109.5     |
| C1-C9-H9B     | 109.5     | C33-C34-H34B  | 109.5     |
| C1-C9-H9C     | 109.5     | C33-C34-H34C  | 109.5     |
| H9A-C9-H9B    | 109.5     | H34A-C34-H34B | 109.5     |
| H9A-C9-H9C    | 109.5     | H34A-C34-H34C | 109.5     |
| H9B-C9-H9C    | 109.5     | H34B-C34-H34C | 109.5     |
| O9-C10-C11    | 111.6(6)  | O1-C35-C36    | 113.3(7)  |
| O11-C10-O9    | 127.9(6)  | O4-C35-O1     | 125.5(7)  |
| O11-C10-C11   | 120.5(6)  | O4-C35-C36    | 121.2(7)  |
| C10-C11-H11A  | 109.4     | C35-C36-H36A  | 109       |
| C10-C11-H11B  | 109.4     | C35-C36-H36B  | 109       |
| H11A-C11-H11B | 108       | H36A-C36-H36B | 107.8     |
| C12-C11-C10   | 111.2(6)  | C37-C36-C35   | 112.8(7)  |
| C12-C11-H11A  | 109.4     | C37-C36-H36A  | 109       |
| C12-C11-H11B  | 109.4     | C37-C36-H36B  | 109       |
| F1-C12-C11    | 113.2(7)  | F8-C37-F11    | 107.7(9)  |
| F3-C12-F1     | 105.1(6)  | F8-C37-F12    | 106.6(9)  |
| F3-C12-C11    | 111.8(7)  | F8-C37-C36    | 113.6(8)  |
| F4-C12-F1     | 106.5(7)  | F11-C37-C36   | 111.7(7)  |
| F4-C12-F3     | 107.7(7)  | F12-C37-F11   | 106.1(8)  |
| F4-C12-C11    | 112.1(6)  | F12-C37-C36   | 110.7(9)  |
| O8-C13-O16    | 125.9(6)  | N5-C38-H38A   | 109.5     |
| O8-C13-C14    | 121.5(6)  | N5-C38-H38B   | 109.5     |
| O16-C13-C14   | 112.6(6)  | N5-C38-H38C   | 109.5     |
| C13-C14-H14A  | 108.7     | H38A-C38-H38B | 109.5     |
| C13-C14-H14B  | 108.7     | H38A-C38-H38C | 109.5     |
| C13-C14-C15   | 114.1(7)  | H38B-C38-H38C | 109.5     |

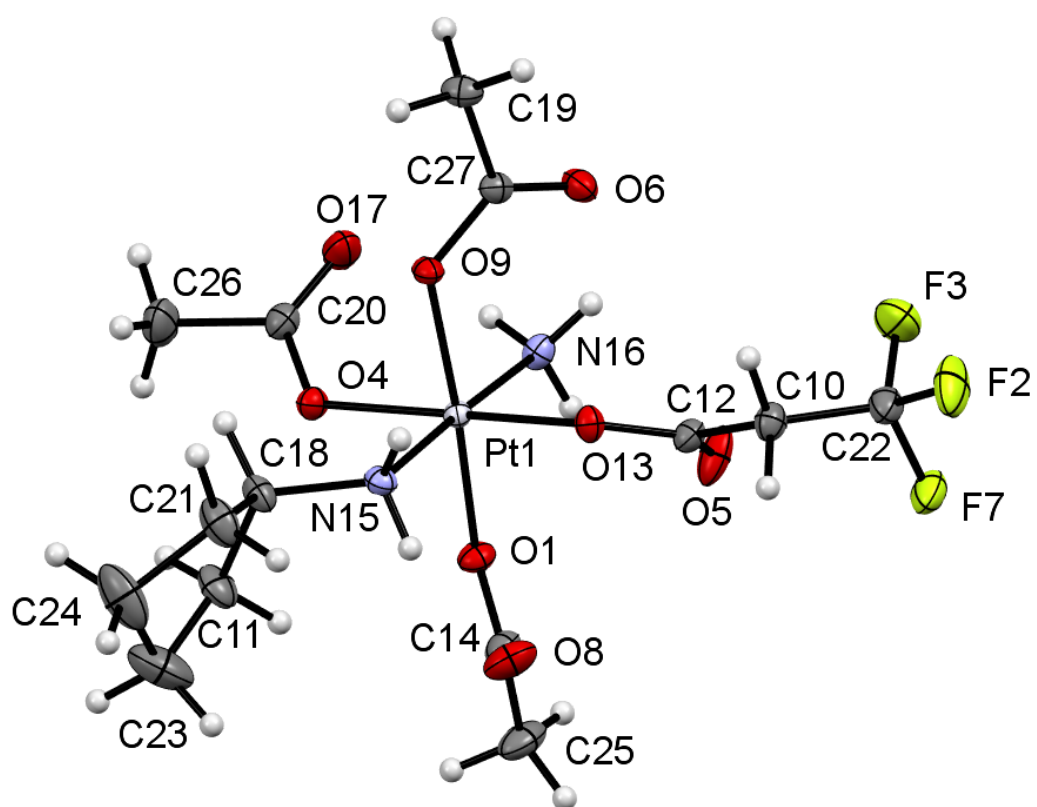

**Figure S129.** ORTEP view of complex **13c** drawn with 50% displacement ellipsoids.

**Table S22.** Overview of the sample and crystal data, data collection and structure refinement of complex **13c**.

| Identification code               | mo_kryv976_p21n                                                                                    |
|-----------------------------------|----------------------------------------------------------------------------------------------------|
| Empirical formula                 | C <sub>14</sub> H <sub>25</sub> F <sub>3</sub> N <sub>2</sub> O <sub>8</sub> Pt                    |
| Formula weight                    | 601.45                                                                                             |
| Temperature                       | 100.0 K                                                                                            |
| Wavelength                        | 0.71073 Å                                                                                          |
| Crystal system                    | Monoclinic                                                                                         |
| Space group                       | P 1 2 <sub>1</sub> /n 1                                                                            |
| Unit cell dimensions              | a = 13.0409(8) Å<br>b = 9.6876(12) Å<br>c = 17.1451(12) Å<br>α = 90°<br>β = 111.571(4)°<br>γ = 90° |
| Volume                            | 2014.3(3) Å <sup>3</sup>                                                                           |
| Z                                 | 4                                                                                                  |
| Density (calculated)              | 1.983 Mg/m <sup>3</sup>                                                                            |
| Absorption coefficient            | 7.036 mm <sup>-1</sup>                                                                             |
| F(000)                            | 1168                                                                                               |
| Crystal size                      | 0.12 x 0.05 x 0.01 mm <sup>3</sup>                                                                 |
| Theta range for data collection   | 2.456 to 30.030°                                                                                   |
| Index ranges                      | -18 ≤ h ≤ 18, -9 ≤ k ≤ 12, -24 ≤ l ≤ 24                                                            |
| Reflections collected             | 55642                                                                                              |
| Independent reflections           | 5679 [R(int) = 0.0406]                                                                             |
| Completeness to theta = 25.242°   | 97.0%                                                                                              |
| Absorption correction             | Semi-empirical from equivalents                                                                    |
| Max. and min. transmission        | 0.6056 and 0.5306                                                                                  |
| Refinement method                 | Full-matrix least-squares on F <sup>2</sup>                                                        |
| Data / restraints / parameters    | 5679 / 0 / 257                                                                                     |
| Goodness-of-fit on F <sup>2</sup> | 1.067                                                                                              |
| Final R indices [I>2sigma(I)]     | R <sub>1</sub> = 0.0208, wR <sub>2</sub> = 0.0415                                                  |
| R indices (all data)              | R <sub>1</sub> = 0.0260, wR <sub>2</sub> = 0.0438                                                  |
| Extinction coefficient            | n/a                                                                                                |
| Largest diff. peak and hole       | 1.179 and -0.732 e·Å <sup>-3</sup>                                                                 |

**Table S23.** Overview of bond lengths of complex **13c**.

| Atoms    | Length [Å] | Atoms    | Length [Å] |
|----------|------------|----------|------------|
| Pt1-O1   | 2.0050(17) | N15-C18  | 1.492(3)   |
| Pt1-O4   | 2.0013(17) | N16-H16A | 0.91       |
| Pt1-O9   | 2.0091(16) | N16-H16B | 0.91       |
| Pt1-O13  | 2.0095(18) | N16-H16C | 0.91       |
| Pt1-N15  | 2.059(2)   | O17-C20  | 1.222(4)   |
| Pt1-N16  | 2.041(2)   | C18-H18  | 1          |
| O1-C14   | 1.307(3)   | C18-C21  | 1.532(4)   |
| F2-C22   | 1.347(3)   | C19-H19A | 0.98       |
| F3-C22   | 1.334(4)   | C19-H19B | 0.98       |
| O4-C20   | 1.310(3)   | C19-H19C | 0.98       |
| O5-C12   | 1.207(3)   | C19-C27  | 1.511(3)   |
| O6-C27   | 1.226(3)   | C20-C26  | 1.514(4)   |
| F7-C22   | 1.342(3)   | C21-H21A | 0.99       |
| O8-C14   | 1.218(4)   | C21-H21B | 0.99       |
| O9-C27   | 1.313(3)   | C21-C24  | 1.512(4)   |
| C10-H10A | 0.99       | C26-H26A | 0.98       |
| C10-H10B | 0.99       | C26-H26B | 0.98       |
| C10-C12  | 1.517(4)   | C26-H26C | 0.98       |
| C10-C22  | 1.497(4)   | C24-H24A | 0.99       |
| C11-H11A | 0.99       | C24-H24B | 0.99       |
| C11-H11B | 0.99       | C24-C23  | 1.520(5)   |
| C11-C18  | 1.543(4)   | C25-H25A | 0.98       |
| C11-C23  | 1.514(5)   | C25-H25B | 0.98       |
| C12-O13  | 1.308(3)   | C25-H25C | 0.98       |
| C14-C25  | 1.511(4)   | C23-H23A | 0.99       |
| N15-H15A | 0.91       | C23-H23B | 0.99       |
| N15-H15B | 0.91       |          |            |

**Table S24.** Overview of angles of complex **13c**.

| Atoms         | Angle [°]  | Atoms         | Angle [°] |
|---------------|------------|---------------|-----------|
| O1-Pt1-O9     | 176.03(7)  | N15-C18-C21   | 111.0(2)  |
| O1-Pt1-O13    | 97.87(7)   | C21-C18-C11   | 105.7(2)  |
| O1-Pt1-N15    | 95.09(8)   | C21-C18-H18   | 108.9     |
| O1-Pt1-N16    | 83.73(8)   | H19A-C19-H19B | 109.5     |
| O4-Pt1-O1     | 86.67(7)   | H19A-C19-H19C | 109.5     |
| O4-Pt1-O9     | 89.38(7)   | H19B-C19-H19C | 109.5     |
| O4-Pt1-O13    | 170.89(8)  | C27-C19-H19A  | 109.5     |
| O4-Pt1-N15    | 89.13(8)   | C27-C19-H19B  | 109.5     |
| O4-Pt1-N16    | 92.63(8)   | C27-C19-H19C  | 109.5     |
| O9-Pt1-O13    | 85.98(7)   | O4-C20-C26    | 111.6(2)  |
| O9-Pt1-N15    | 84.44(8)   | O17-C20-O4    | 126.4(2)  |
| O9-Pt1-N16    | 96.86(8)   | O17-C20-C26   | 122.0(3)  |
| O13-Pt1-N15   | 82.63(8)   | C18-C21-H21A  | 110.9     |
| O13-Pt1-N16   | 95.70(8)   | C18-C21-H21B  | 110.9     |
| N16-Pt1-N15   | 177.82(8)  | H21A-C21-H21B | 109       |
| C14-O1-Pt1    | 123.15(18) | C24-C21-C18   | 104.1(3)  |
| C20-O4-Pt1    | 124.31(16) | C24-C21-H21A  | 110.9     |
| C27-O9-Pt1    | 121.97(15) | C24-C21-H21B  | 110.9     |
| H10A-C10-H10B | 107.7      | F2-C22-C10    | 110.4(3)  |
| C12-C10-H10A  | 108.8      | F3-C22-F2     | 106.5(2)  |
| C12-C10-H10B  | 108.8      | F3-C22-F7     | 106.4(3)  |
| C22-C10-H10A  | 108.8      | F3-C22-C10    | 113.3(2)  |
| C22-C10-H10B  | 108.8      | F7-C22-F2     | 105.8(2)  |
| C22-C10-C12   | 113.9(2)   | F7-C22-C10    | 113.9(2)  |
| H11A-C11-H11B | 108.7      | C20-C26-H26A  | 109.5     |
| C18-C11-H11A  | 110.6      | C20-C26-H26B  | 109.5     |
| C18-C11-H11B  | 110.6      | C20-C26-H26C  | 109.5     |
| C23-C11-H11A  | 110.6      | H26A-C26-H26B | 109.5     |
| C23-C11-H11B  | 110.6      | H26A-C26-H26C | 109.5     |
| C23-C11-C18   | 105.9(3)   | H26B-C26-H26C | 109.5     |
| O5-C12-C10    | 123.8(2)   | O6-C27-O9     | 125.7(2)  |
| O5-C12-O13    | 126.0(2)   | O6-C27-C19    | 121.1(2)  |
| O13-C12-C10   | 110.2(2)   | O9-C27-C19    | 113.2(2)  |
| C12-O13-Pt1   | 123.69(18) | C21-C24-H24A  | 111.2     |

| Atoms         | Angle [°]  | Atoms         | Angle [°] |
|---------------|------------|---------------|-----------|
| O1-C14-C25    | 111.9(3)   | C21-C24-H24B  | 111.2     |
| O8-C14-O1     | 125.7(2)   | C21-C24-C23   | 102.9(3)  |
| O8-C14-C25    | 122.3(3)   | H24A-C24-H24B | 109.1     |
| Pt1-N15-H15A  | 107.2      | C23-C24-H24A  | 111.2     |
| Pt1-N15-H15B  | 107.2      | C23-C24-H24B  | 111.2     |
| H15A-N15-H15B | 106.8      | C14-C25-H25A  | 109.5     |
| C18-N15-Pt1   | 120.70(18) | C14-C25-H25B  | 109.5     |
| C18-N15-H15A  | 107.2      | C14-C25-H25C  | 109.5     |
| C18-N15-H15B  | 107.2      | H25A-C25-H25B | 109.5     |
| Pt1-N16-H16A  | 109.5      | H25A-C25-H25C | 109.5     |
| Pt1-N16-H16B  | 109.5      | H25B-C25-H25C | 109.5     |
| Pt1-N16-H16C  | 109.5      | C11-C23-C24   | 103.9(3)  |
| H16A-N16-H16B | 109.5      | C11-C23-H23A  | 111       |
| H16A-N16-H16C | 109.5      | C11-C23-H23B  | 111       |
| H16B-N16-H16C | 109.5      | C24-C23-H23A  | 111       |
| C11-C18-H18   | 108.9      | C24-C23-H23B  | 111       |
| N15-C18-C11   | 113.3(2)   | H23A-C23-H23B | 109       |
| N15-C18-H18   | 108.9      |               |           |



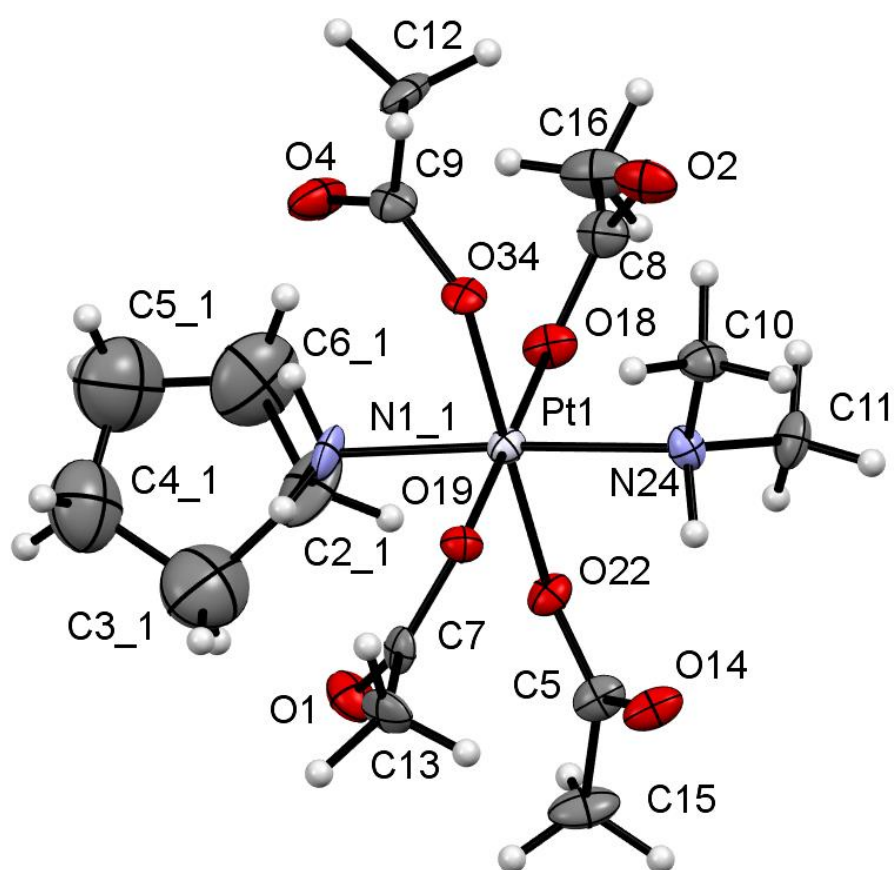

**Figure S130.** ORTEP view of complex **15e** drawn with 50% displacement ellipsoids.

**Table S25.** Overview of the sample and crystal data, data collection and structure refinement of complex **15e**.

| Identification code               | KRYV901                                                                                                                      |
|-----------------------------------|------------------------------------------------------------------------------------------------------------------------------|
| Empirical formula                 | C <sub>15</sub> H <sub>30</sub> N <sub>2</sub> O <sub>8</sub> Pt                                                             |
| Formula weight                    | 561.50                                                                                                                       |
| Temperature                       | 100(2) K                                                                                                                     |
| Wavelength                        | 0.71073 Å                                                                                                                    |
| Crystal system                    | Tetragonal                                                                                                                   |
| Space group                       | P4 <sub>1</sub> 2 <sub>1</sub> 2                                                                                             |
| Unit cell dimensions              | a = 15.7587(4) Å<br>b = 15.7587(4) Å<br>c = 16.1203(7) Å<br>$\alpha = 90^\circ$<br>$\beta = 90^\circ$<br>$\gamma = 90^\circ$ |
| Volume                            | 4003.3(3) Å <sup>3</sup>                                                                                                     |
| Z                                 | 8                                                                                                                            |
| Density (calculated)              | 1.863 Mg/m <sup>3</sup>                                                                                                      |
| Absorption coefficient            | 7.052 mm <sup>-1</sup>                                                                                                       |
| F(000)                            | 2208                                                                                                                         |
| Crystal size                      | 0.072 x 0.07 x 0.013 mm <sup>3</sup>                                                                                         |
| Theta range for data collection   | 1.807 to 30.101°                                                                                                             |
| Index ranges                      | -20 ≤ h ≤ 22, -22 ≤ k ≤ 14, -19 ≤ l ≤ 22                                                                                     |
| Reflections collected             | 37973                                                                                                                        |
| Independent reflections           | 5876 [R(int) = 0.0664]                                                                                                       |
| Completeness to theta = 25.242°   | 99.9%                                                                                                                        |
| Absorption correction             | None                                                                                                                         |
| Refinement method                 | Full-matrix least-squares on F <sup>2</sup>                                                                                  |
| Data / restraints / parameters    | 5876 / 324 / 241                                                                                                             |
| Goodness-of-fit on F <sup>2</sup> | 1.366                                                                                                                        |
| Final R indices [I>2sigma(I)]     | R <sup>1</sup> = 0.0477, wR <sup>2</sup> = 0.1498                                                                            |
| R indices (all data)              | R <sup>1</sup> = 0.0563, wR <sup>2</sup> = 0.1626                                                                            |
| Absolute structure parameter      | -0.001(13)                                                                                                                   |
| Extinction coefficient            | n/a                                                                                                                          |
| Largest diff. peak and hole       | 2.332 and -2.097 e·Å <sup>-3</sup>                                                                                           |

**Table S26.** Overview of bond lengths of complex **15e**.

| Atoms    | Length [Å] | Atoms    | Length [Å] |
|----------|------------|----------|------------|
| Pt1-O18  | 2.008(9)   | C12-H12B | 0.98       |
| Pt1-O34  | 2.013(8)   | C12-H12C | 0.98       |
| Pt1-O19  | 2.014(8)   | C16-H16A | 0.98       |
| Pt1-O22  | 2.014(8)   | C16-H16B | 0.98       |
| Pt1-N11  | 2.064(9)   | C16-H16C | 0.98       |
| Pt1-N24  | 2.103(10)  | C15-H15A | 0.98       |
| O34-C9   | 1.290(15)  | C15-H15B | 0.98       |
| O18-C8   | 1.321(16)  | C15-H15C | 0.98       |
| O19-C7   | 1.300(14)  | C13-H13A | 0.98       |
| O22-C5   | 1.313(16)  | C13-H13B | 0.98       |
| N24-C10  | 1.463(16)  | C13-H13C | 0.98       |
| N24-C11  | 1.502(16)  | N11-C21  | 1.494(12)  |
| N24-H24  | 1          | N11-H1A1 | 0.91       |
| O1-C7    | 1.244(15)  | N11-H1B1 | 0.91       |
| O2-C8    | 1.221(17)  | C21-C61  | 1.526(14)  |
| O4-C9    | 1.257(16)  | C21-C31  | 1.546(15)  |
| C5-O14   | 1.221(14)  | C21-H21  | 1          |
| C5-C15   | 1.498(18)  | C31-C41  | 1.54(2)    |
| C7-C13   | 1.512(16)  | C31-H3A1 | 0.99       |
| C8-C16   | 1.493(19)  | C31-H3B1 | 0.99       |
| C9-C12   | 1.518(17)  | C41-C51  | 1.43(3)    |
| C10-H10A | 0.98       | C41-H4A1 | 0.99       |
| C10-H10B | 0.98       | C41-H4B1 | 0.99       |
| C10-H10C | 0.98       | C51-C61  | 1.45(3)    |
| C11-H11A | 0.98       | C51-H5A1 | 0.99       |
| C11-H11B | 0.98       | C51-H5B1 | 0.99       |
| C11-H11C | 0.98       | C61-H6A1 | 0.99       |
| C12-H12A | 0.98       | C61-H6B1 | 0.99       |

**Table S27.** Overview of angles of complex **15e**.

| Atoms       | Angle [°] | Atoms         | Angle [°] |
|-------------|-----------|---------------|-----------|
| O18-Pt1-O34 | 95.8(3)   | C8-C16-H16A   | 109.5     |
| O18-Pt1-O19 | 179.4(3)  | C8-C16-H16B   | 109.5     |
| O34-Pt1-O19 | 83.6(3)   | H16A-C16-H16B | 109.5     |
| O18-Pt1-O22 | 83.5(4)   | C8-C16-H16C   | 109.5     |
| O34-Pt1-O22 | 179.2(4)  | H16A-C16-H16C | 109.5     |
| O19-Pt1-O22 | 97.2(3)   | H16B-C16-H16C | 109.5     |
| O18-Pt1-N11 | 85.0(4)   | C5-C15-H15A   | 109.5     |
| O34-Pt1-N11 | 92.8(4)   | C5-C15-H15B   | 109.5     |
| O19-Pt1-N11 | 94.8(4)   | H15A-C15-H15B | 109.5     |
| O22-Pt1-N11 | 87.4(4)   | C5-C15-H15C   | 109.5     |
| O18-Pt1-N24 | 97.8(4)   | H15A-C15-H15C | 109.5     |
| O34-Pt1-N24 | 88.4(4)   | H15B-C15-H15C | 109.5     |
| O19-Pt1-N24 | 82.3(3)   | C7-C13-H13A   | 109.5     |
| O22-Pt1-N24 | 91.4(4)   | C7-C13-H13B   | 109.5     |
| N11-Pt1-N24 | 176.8(4)  | H13A-C13-H13B | 109.5     |
| C9-O34-Pt1  | 126.3(8)  | C7-C13-H13C   | 109.5     |
| C8-O18-Pt1  | 125.2(8)  | H13A-C13-H13C | 109.5     |
| C7-O19-Pt1  | 122.2(7)  | H13B-C13-H13C | 109.5     |
| C5-O22-Pt1  | 122.1(8)  | C21-N11-Pt1   | 120.3(8)  |
| C10-N24-C11 | 112.3(10) | C21-N11-H1A1  | 107.3     |
| C10-N24-Pt1 | 115.0(8)  | Pt1-N11-H1A1  | 107.3     |
| C11-N24-Pt1 | 113.9(7)  | C21-N11-H1B1  | 107.3     |
| C10-N24-H24 | 104.8     | Pt1-N11-H1B1  | 107.3     |
| C11-N24-H24 | 104.8     | H1A1-N11-H1B1 | 106.9     |
| Pt1-N24-H24 | 104.8     | N11-C21-C61   | 113.0(13) |
| O14-C5-O22  | 126.2(12) | N11-C21-C31   | 109.4(14) |
| O14-C5-C15  | 121.8(12) | C61-C21-C31   | 101.3(15) |
| O22-C5-C15  | 112.0(11) | N11-C21-H21   | 110.9     |
| O1-C7-O19   | 125.7(10) | C61-C21-H21   | 110.9     |
| O1-C7-C13   | 121.9(11) | C31-C21-H21   | 110.9     |
| O19-C7-C13  | 112.3(10) | C41-C31-C21   | 102.8(15) |
| O2-C8-O18   | 124.6(12) | C41-C31-H3A1  | 111.2     |
| O2-C8-C16   | 123.7(13) | C21-C31-H3A1  | 111.2     |
| O18-C8-C16  | 111.5(12) | C41-C31-H3B1  | 111.2     |

| Atoms         | Angle [°] | Atoms         | Angle [°] |
|---------------|-----------|---------------|-----------|
| O4-C9-O34     | 126.4(11) | C21-C31-H3B1  | 111.2     |
| O4-C9-C12     | 122.0(11) | H3A1-C31-H3B1 | 109.1     |
| O34-C9-C12    | 111.6(11) | C51-C41-C31   | 109.1(19) |
| N24-C10-H10A  | 109.5     | C51-C41-H4A1  | 109.9     |
| N24-C10-H10B  | 109.5     | C31-C41-H4A1  | 109.9     |
| H10A-C10-H10B | 109.5     | C51-C41-H4B1  | 109.9     |
| N24-C10-H10C  | 109.5     | C31-C41-H4B1  | 109.9     |
| H10A-C10-H10C | 109.5     | H4A1-C41-H4B1 | 108.3     |
| H10B-C10-H10C | 109.5     | C41-C51-C61   | 108(2)    |
| N24-C11-H11A  | 109.5     | C41-C51-H5A1  | 110.2     |
| N24-C11-H11B  | 109.5     | C61-C51-H5A1  | 110.2     |
| H11A-C11-H11B | 109.5     | C41-C51-H5B1  | 110.2     |
| N24-C11-H11C  | 109.5     | C61-C51-H5B1  | 110.2     |
| H11A-C11-H11C | 109.5     | H5A1-C51-H5B1 | 108.5     |
| H11B-C11-H11C | 109.5     | C51-C61-C21   | 108.9(17) |
| C9-C12-H12A   | 109.5     | C51-C61-H6A1  | 109.9     |
| C9-C12-H12B   | 109.5     | C21-C61-H6A1  | 109.9     |
| H12A-C12-H12B | 109.5     | C51-C61-H6B1  | 109.9     |
| C9-C12-H12C   | 109.5     | C21-C61-H6B1  | 109.9     |
| H12A-C12-H12C | 109.5     | H6A1-C61-H6B1 | 108.3     |
| H12B-C12-H12C | 109.5     |               |           |

#### 4. Concentration-effect curves

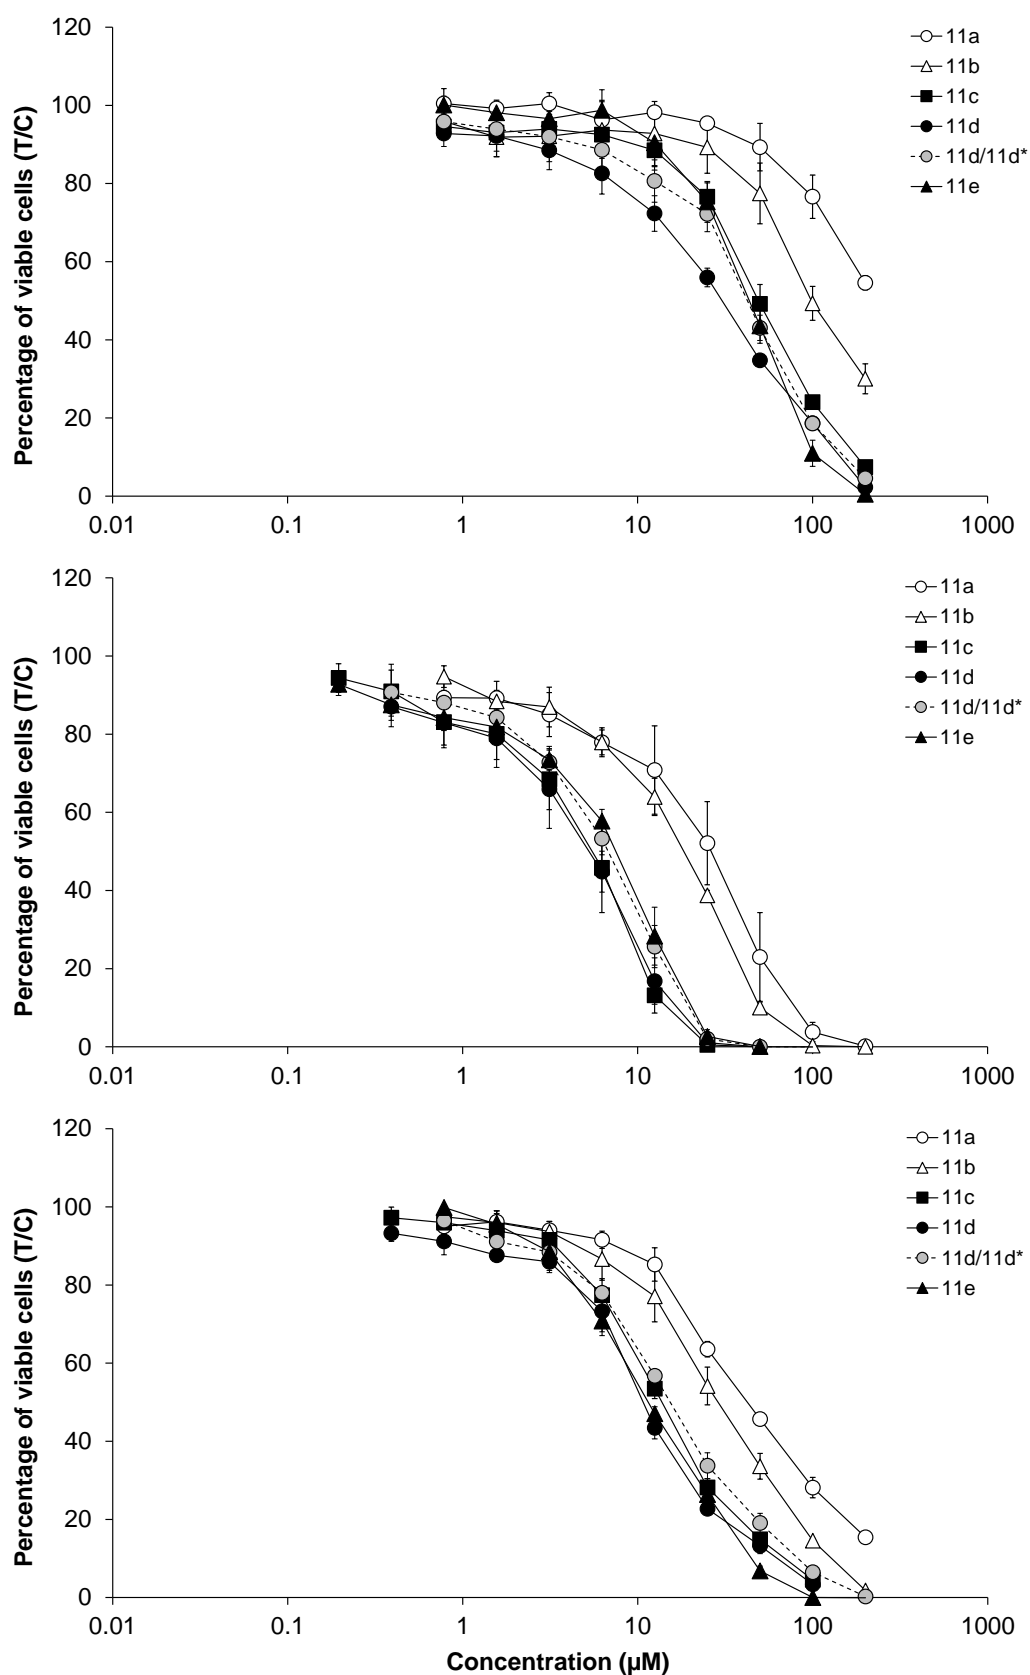

**Figure S131.** Concentration-effect curves of **11a–11e** in A549 (top), CH1/PA-1 (middle) and SW480 (bottom) cells, obtained by MTT assays with 96 h exposure time. Values are means  $\pm$  standard deviations from at least three independent experiments.

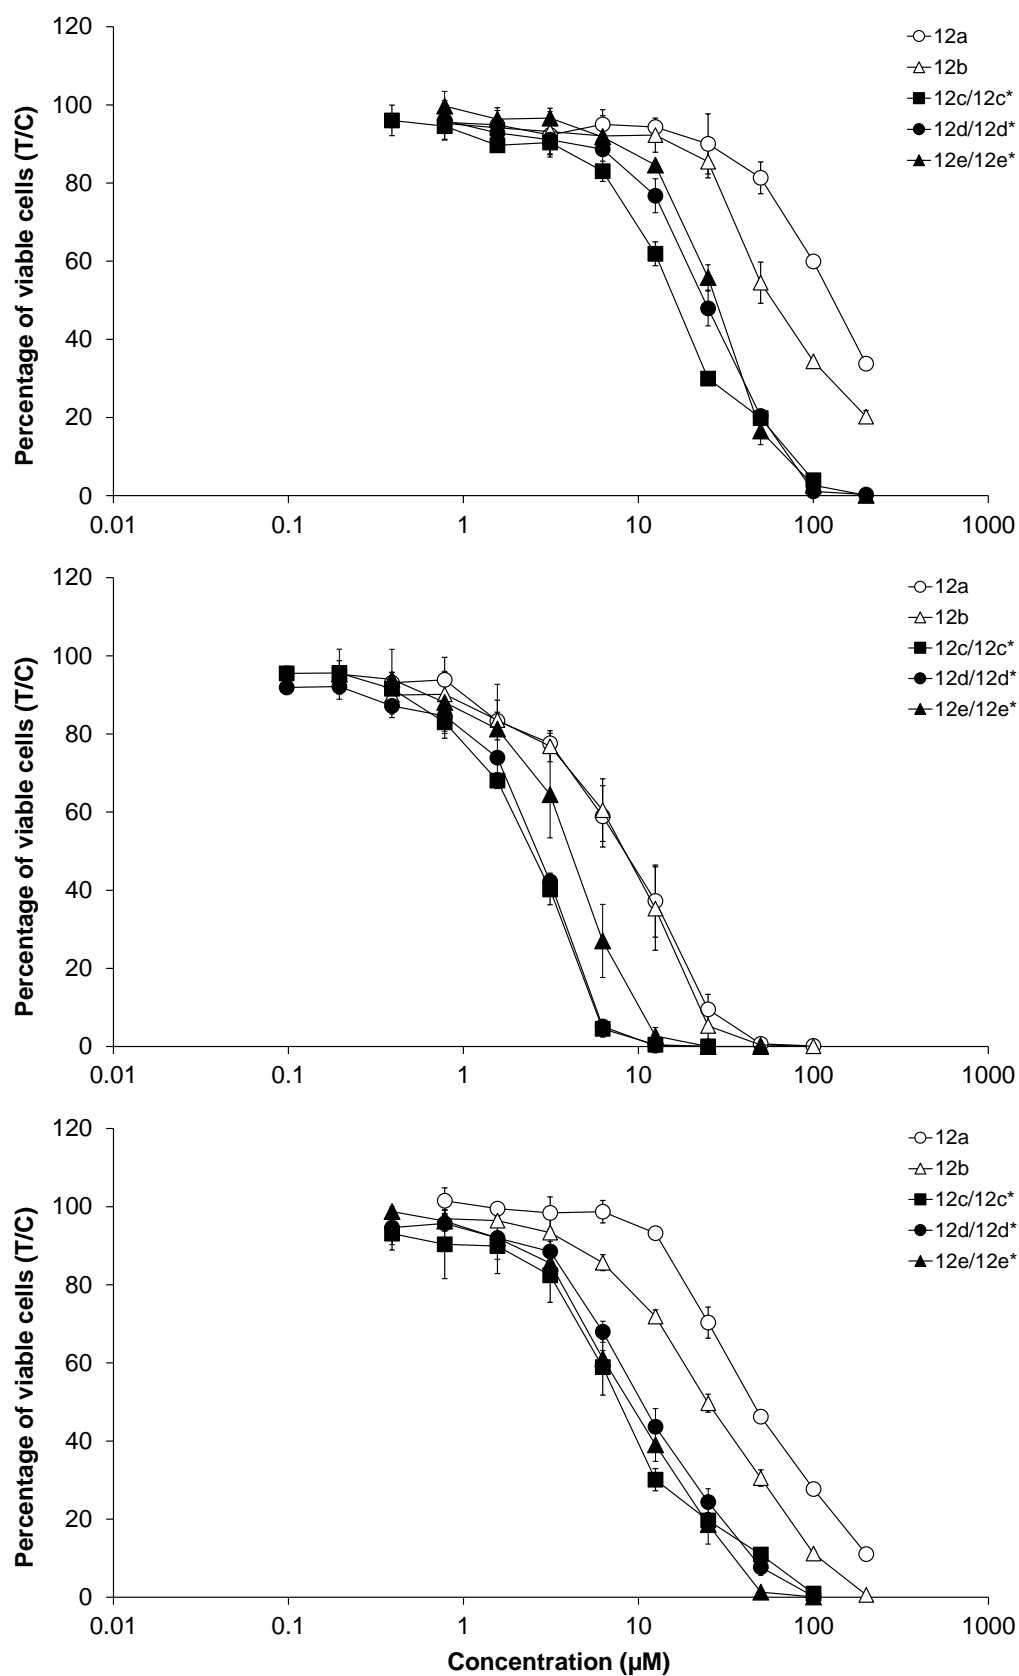

**Figure S132.** Concentration-effect curves of **12a–12e** in A549 (top), CH1/PA-1 (middle) and SW480 (bottom) cells, obtained by MTT assays with 96 h exposure time. Values are means  $\pm$  standard deviations from at least three independent experiments.

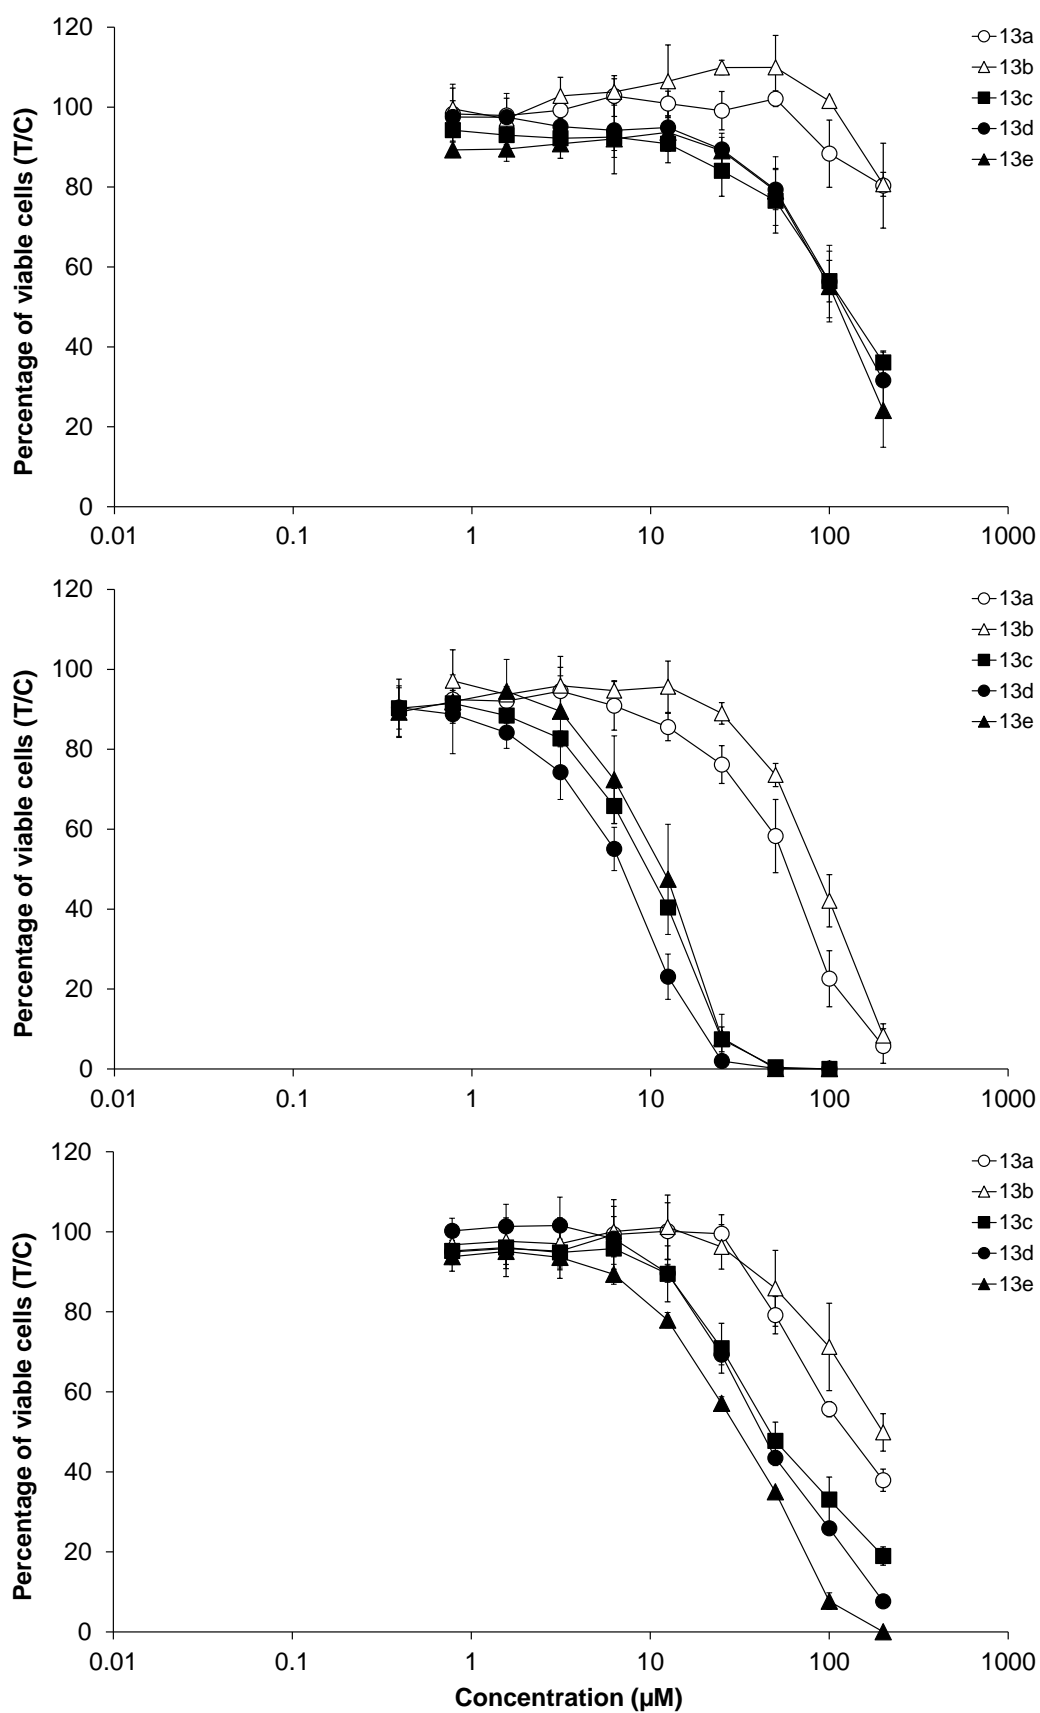

**Figure S133.** Concentration-effect curves of **13a–13e** in A549 (top), CH1/PA-1 (middle) and SW480 (bottom) cells, obtained by MTT assays with 96 h exposure time. Values are means  $\pm$  standard deviations from at least three independent experiments.



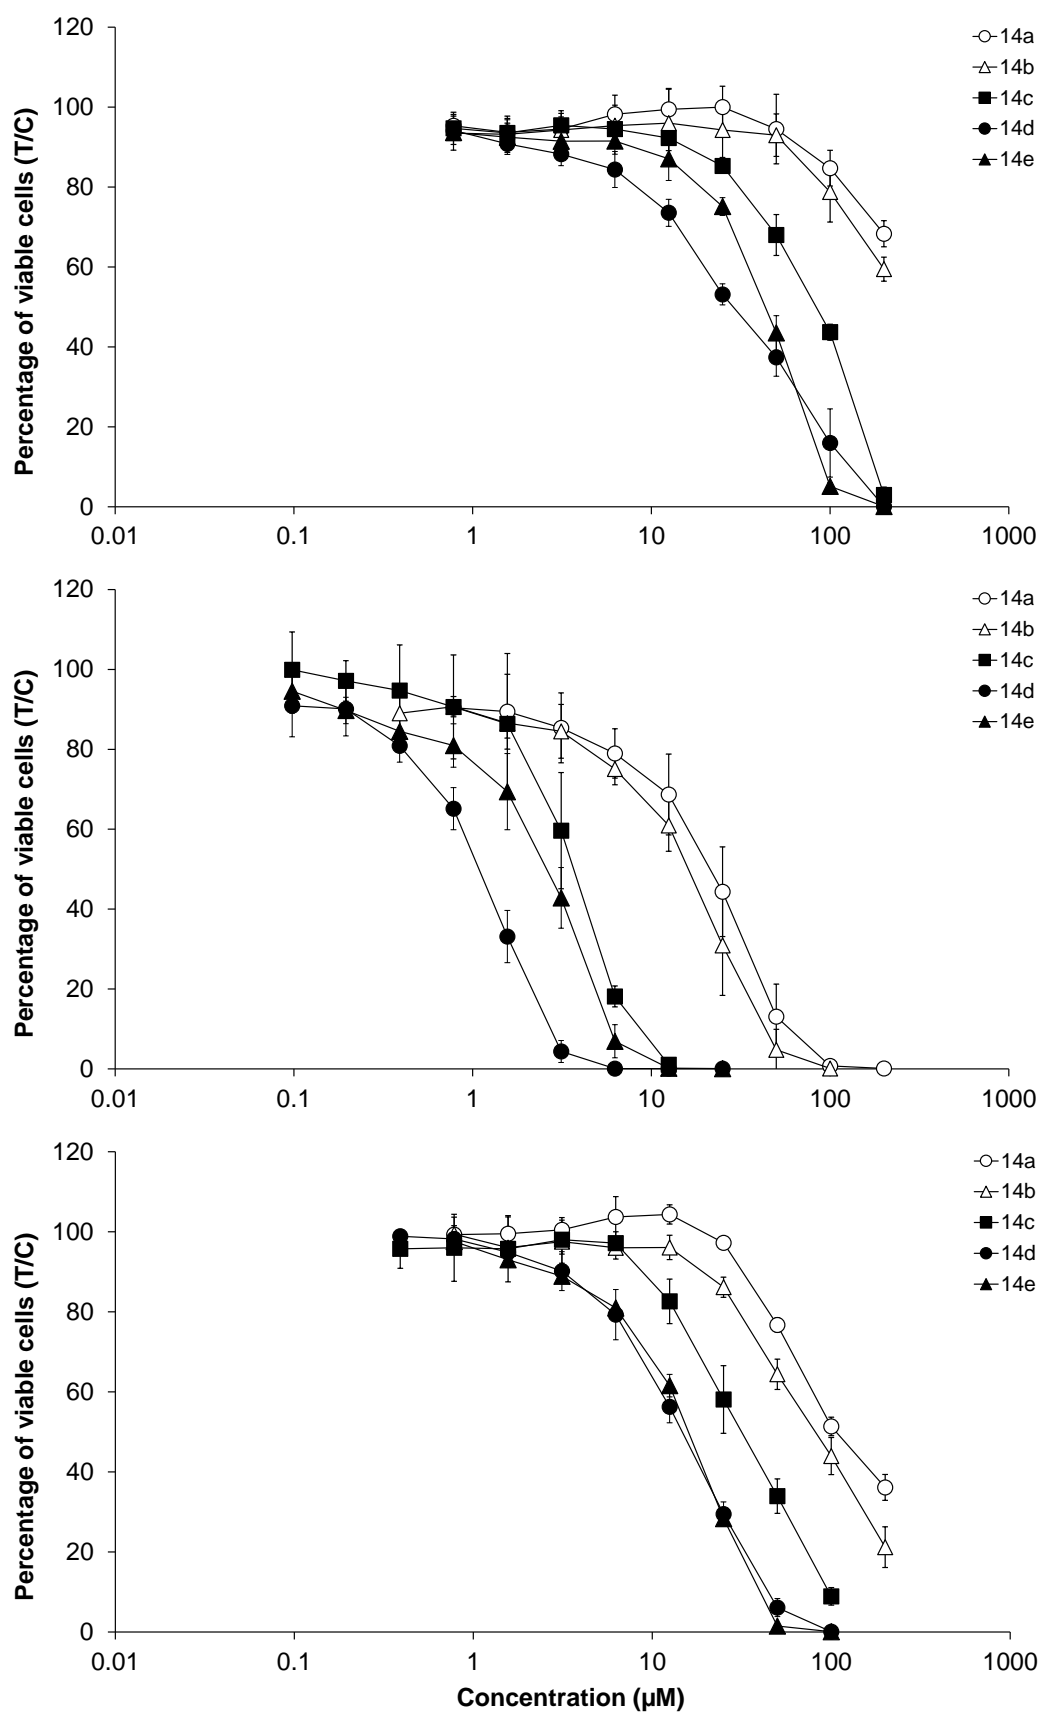

**Figure S134.** Concentration-effect curves of **14a–14e** in A549 (top), CH1/PA-1 (middle) and SW480 (bottom) cells, obtained by MTT assays with 96 h exposure time. Values are means  $\pm$  standard deviations from at least three independent experiments.

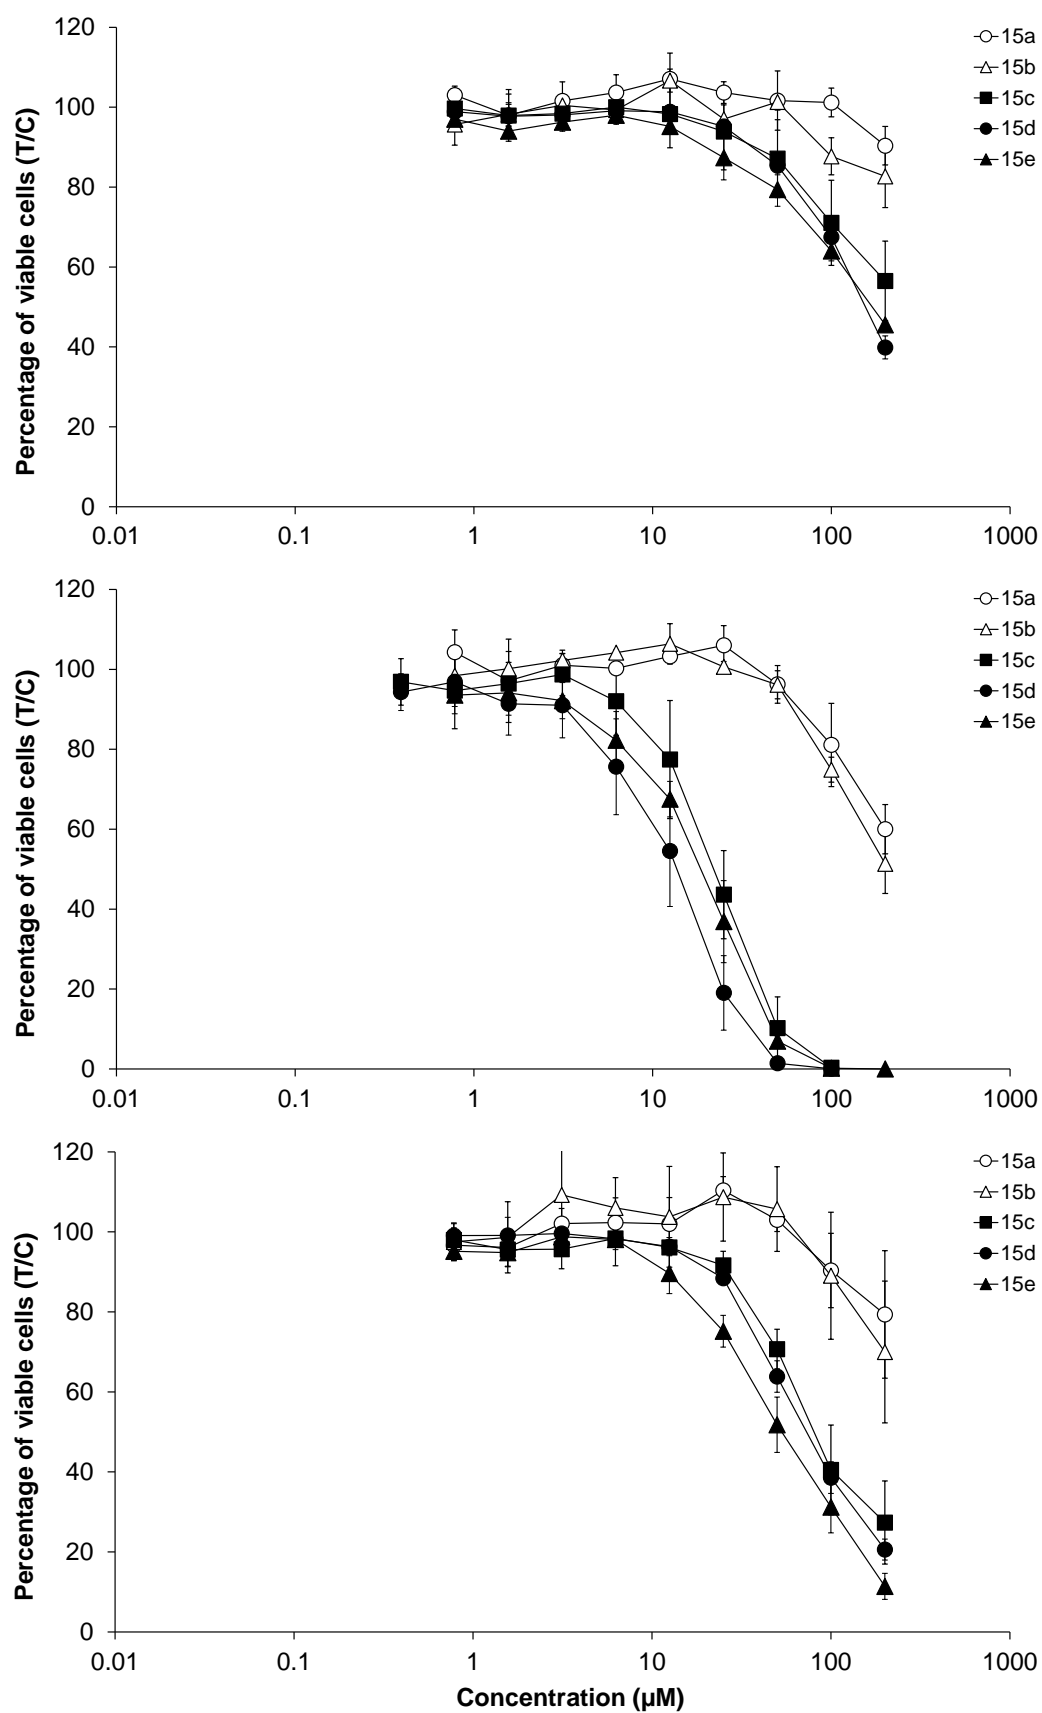

**Figure S135.** Concentration-effect curves of **15a–15e** in A549 (top), CH1/PA-1 (middle) and SW480 (bottom) cells, obtained by MTT assays with 96 h exposure time. Values are means  $\pm$  standard deviations from at least three independent experiments.

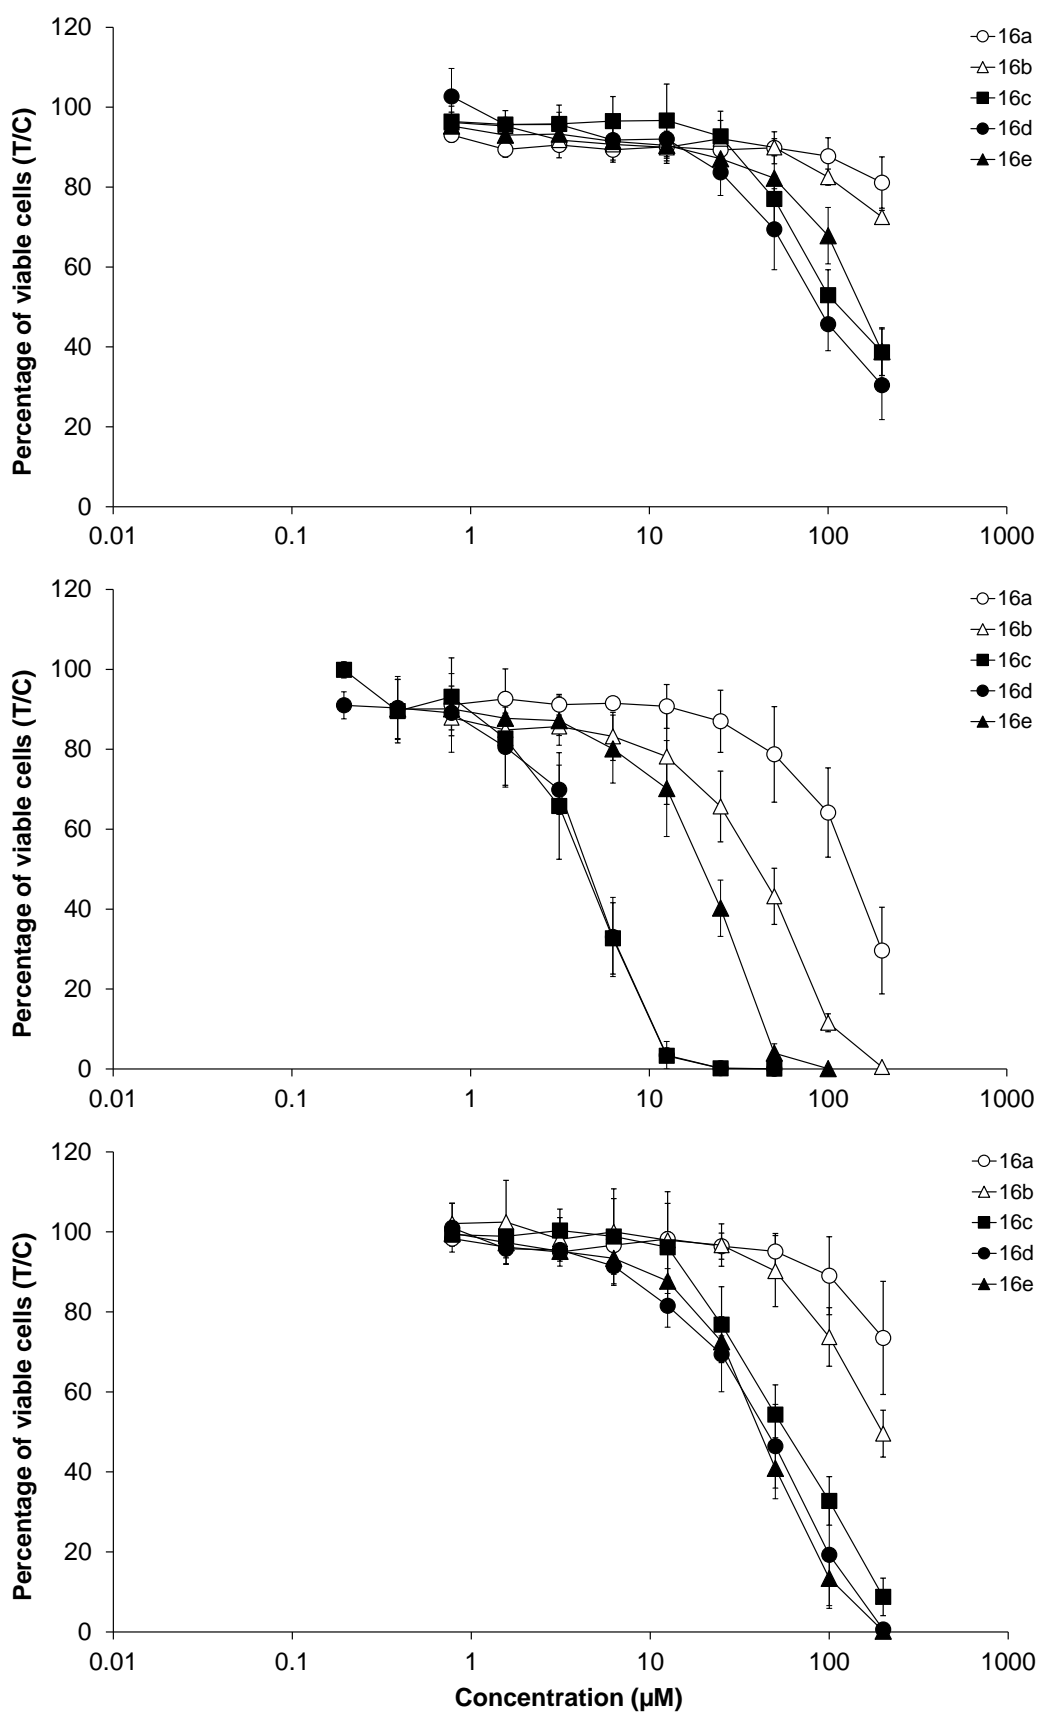

**Figure S136.** Concentration-effect curves of **16a–16e** in A549 (top), CH1/PA-1 (middle) and SW480 (bottom) cells, obtained by MTT assays with 96 h exposure time. Values are means  $\pm$  standard deviations from at least three independent experiments.

## 5. Flow-cytometric analysis

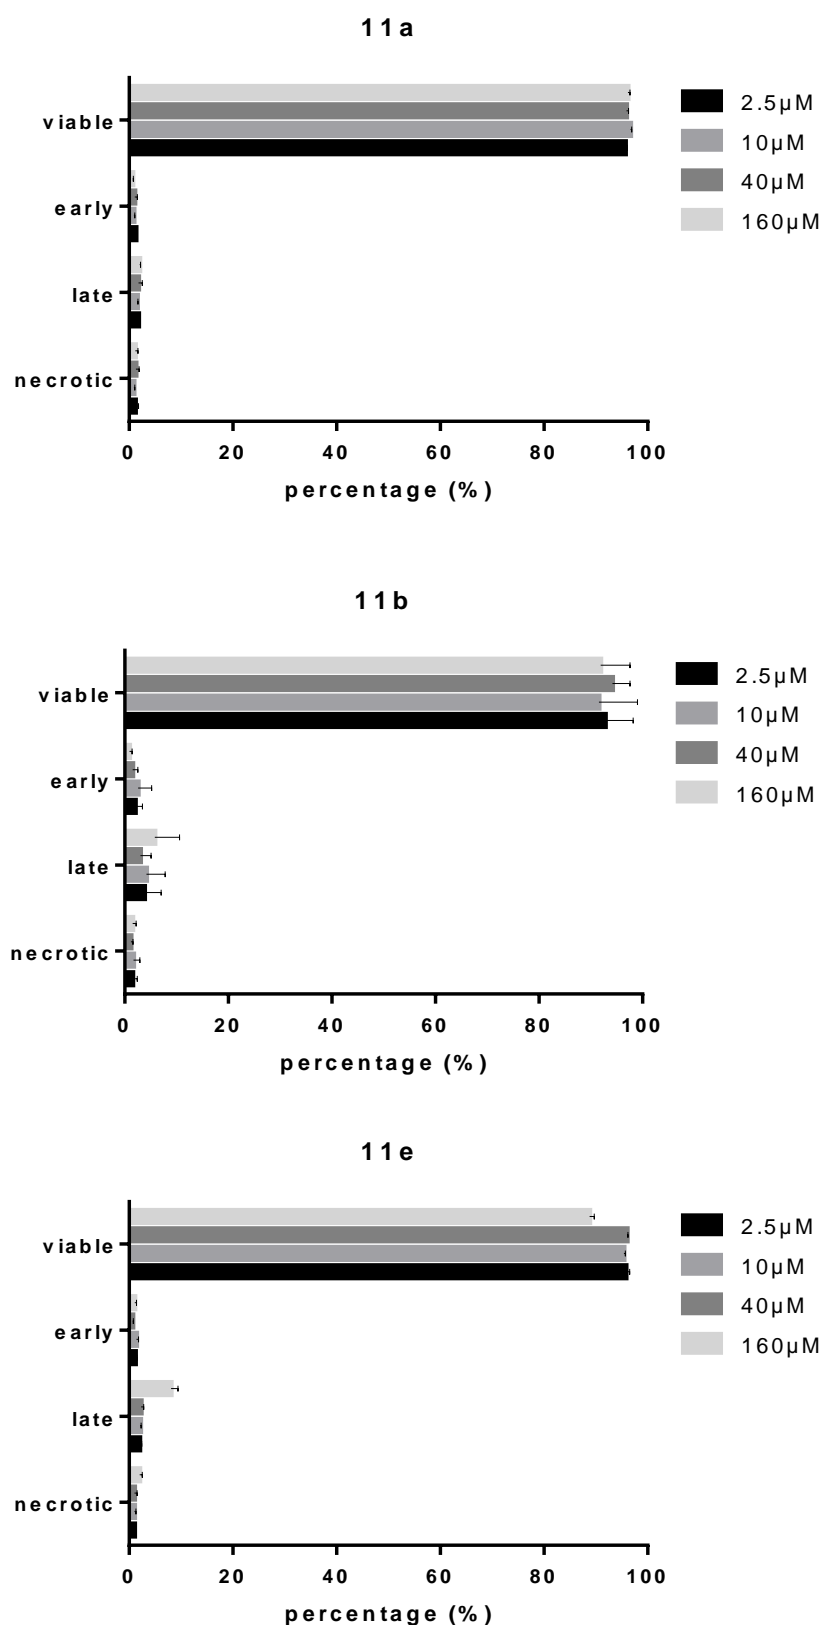

**Figure S137.** Flow-cytometric analysis of induction of early and late apoptosis as well as necrosis in SW480 after 24 h incubation with different concentrations of platinum(IV) complexes **11a**, **11b** and **11e**. The results are means with standard deviations from at least three independent experiments.

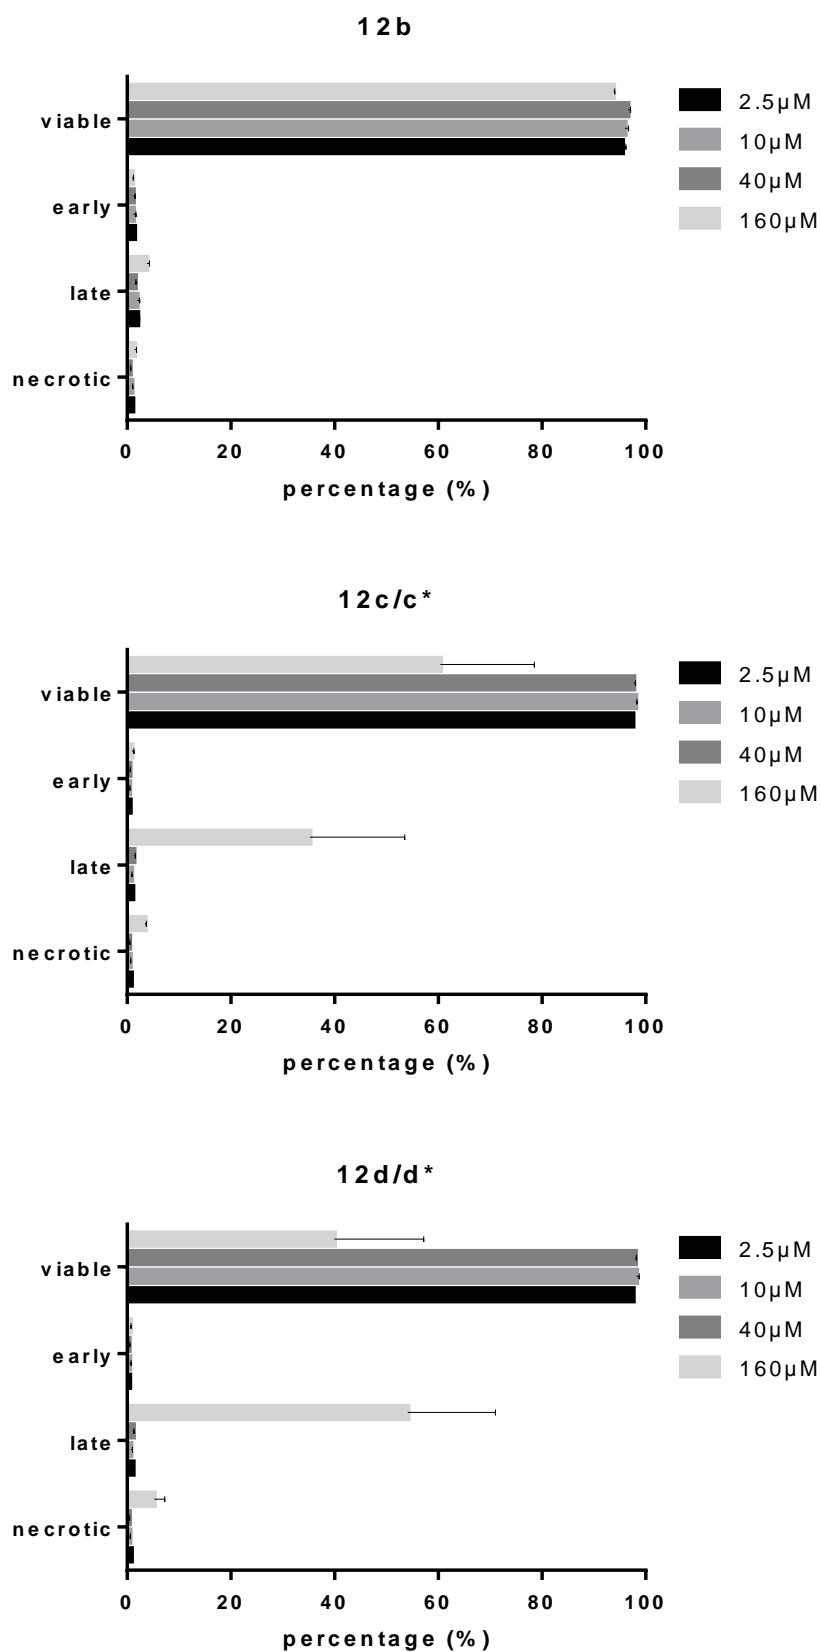

**Figure S138.** Flow-cytometric analysis of induction of early and late apoptosis as well as necrosis in SW480 after 24 h incubation with different concentrations of platinum(IV) complexes **12b**, **12c/12c\*** and **12d/12d\***. The results are means with standard deviations from at least three independent experiments.

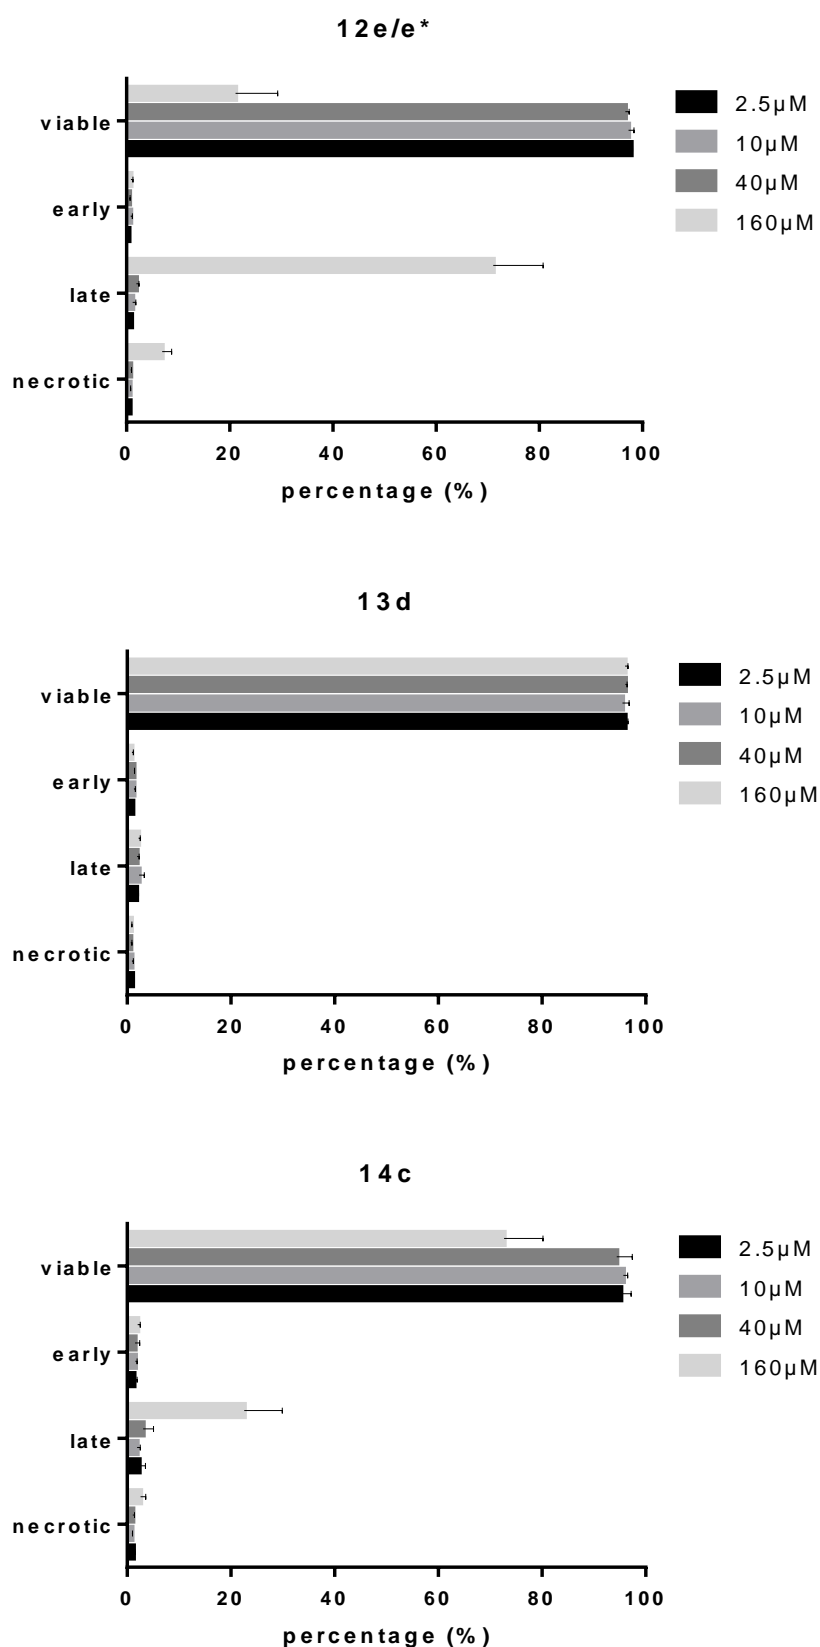

**Figure S139.** Flow-cytometric analysis of induction of early and late apoptosis as well as necrosis in SW480 after 24 h incubation with different concentrations of platinum(IV) complexes **12e/12e\***, **13d** and **14c**. The results are means with standard deviations from at least three independent experiments.

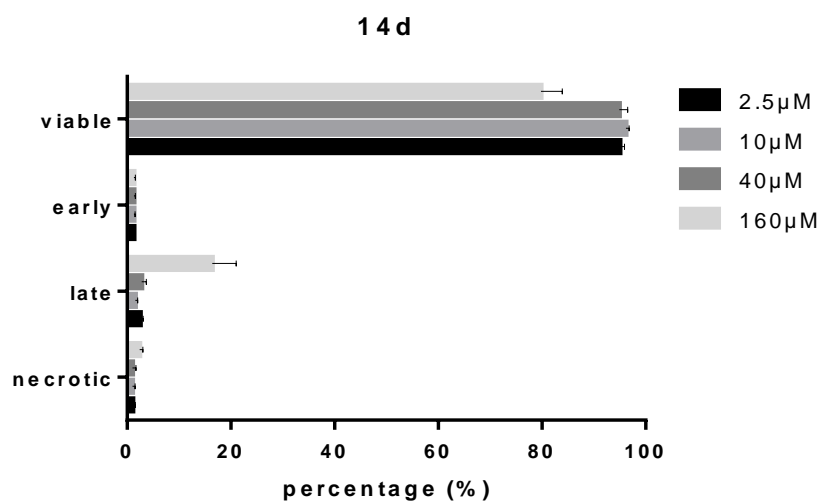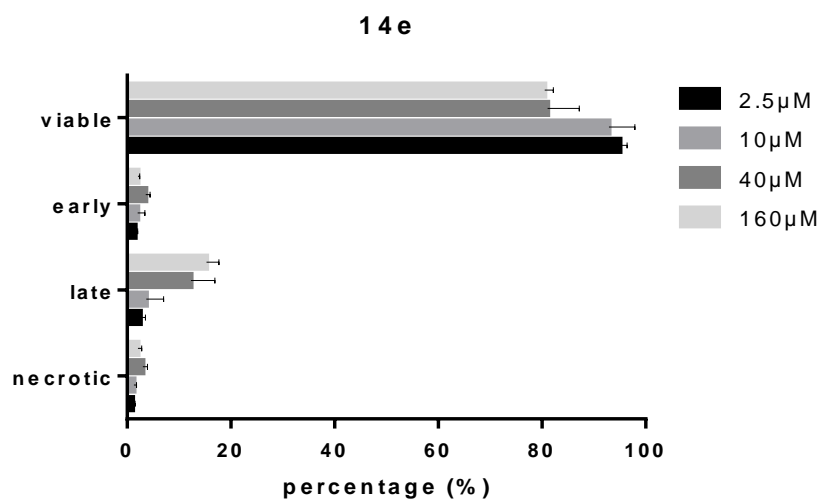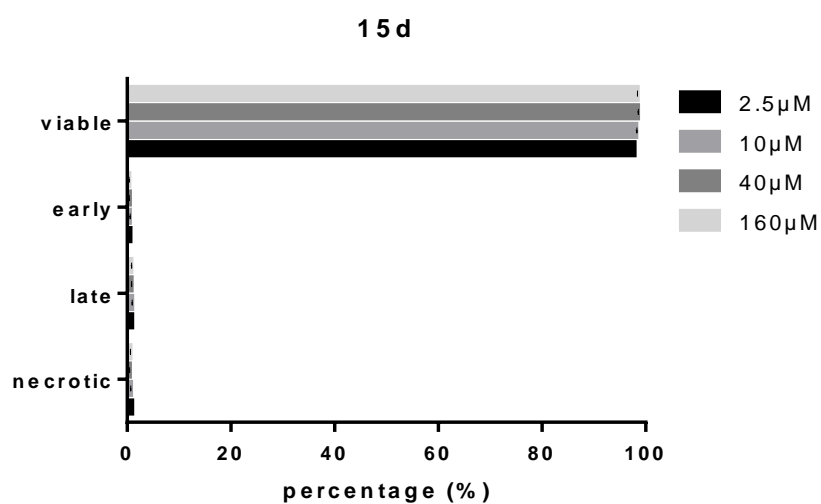

**Figure S140.** Flow-cytometric analysis of induction of early and late apoptosis as well as necrosis in SW480 after 24 h incubation with different concentrations of platinum(IV) complexes **14d**, **14e** and **15d**. The results are means with standard deviations from at least three independent experiments.

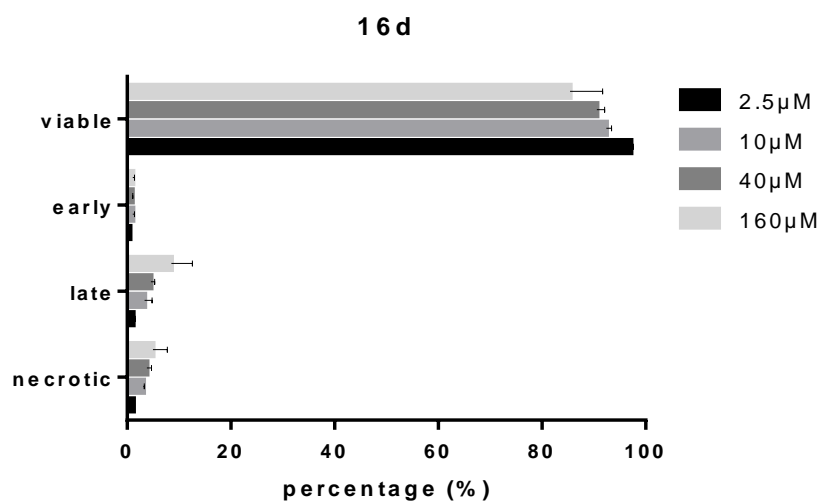

**Figure S141.** Flow-cytometric analysis of induction of early and late apoptosis as well as necrosis in SW480 after 24 h incubation with different concentrations of platinum(IV) complexes **16d**. The results are means with standard deviations from at least three independent experiments.



**Table S28.** Determination of apoptosis and necrosis induction by means of flow-cytometric annexin V/PI assays in SW480 colon cancer cells of selected platinum(IV) complexes.

| Sample          | Concentration<br>[ $\mu$ M] | Viable cells [%] | Early apoptotic<br>cells [%] | Late apoptotic<br>cells [%] | Necrotic<br>cells [%] |
|-----------------|-----------------------------|------------------|------------------------------|-----------------------------|-----------------------|
| <b>11a</b>      | 2.5                         | 95.7 $\pm$ 0.4   | 1.3 $\pm$ 0.0                | 1.8 $\pm$ 0.2               | 1.2 $\pm$ 0.6         |
|                 | 10                          | 96.7 $\pm$ 0.2   | 0.9 $\pm$ 0.2                | 1.6 $\pm$ 0.1               | 0.9 $\pm$ 0.2         |
| <b>11b</b>      | 2.5                         | 92.8 $\pm$ 5.4   | 2.0 $\pm$ 1.4                | 3.8 $\pm$ 3.2               | 1.5 $\pm$ 0.9         |
|                 | 10                          | 91.6 $\pm$ 7.4   | 2.6 $\pm$ 2.6                | 4.2 $\pm$ 3.6               | 1.7 $\pm$ 1.2         |
| <b>11e</b>      | 2.5                         | 95.8 $\pm$ 0.7   | 1.2 $\pm$ 0.3                | 2.0 $\pm$ 0.4               | 1.0 $\pm$ 0.2         |
|                 | 10                          | 95.4 $\pm$ 0.3   | 1.4 $\pm$ 0.4                | 2.2 $\pm$ 0.1               | 1.0 $\pm$ 0.3         |
| <b>12b</b>      | 2.5                         | 95.5 $\pm$ 0.7   | 1.4 $\pm$ 0.3                | 2.0 $\pm$ 0.4               | 1.1 $\pm$ 0.1         |
|                 | 10                          | 96.0 $\pm$ 0.7   | 1.2 $\pm$ 0.5                | 1.9 $\pm$ 0.5               | 0.9 $\pm$ 0.2         |
| <b>12c/12c*</b> | 2.5                         | 97.5 $\pm$ 0.2   | 0.6 $\pm$ 0.1                | 1.1 $\pm$ 0.1               | 0.8 $\pm$ 0.1         |
|                 | 10                          | 98.1 $\pm$ 0.3   | 0.5 $\pm$ 0.1                | 0.9 $\pm$ 0.1               | 0.6 $\pm$ 0.1         |
| <b>12d/12d*</b> | 2.5                         | 97.6 $\pm$ 0.2   | 0.5 $\pm$ 0.1                | 1.1 $\pm$ 0.2               | 0.8 $\pm$ 0.2         |
|                 | 10                          | 98.3 $\pm$ 0.5   | 0.5 $\pm$ 0.3                | 0.7 $\pm$ 0.3               | 0.6 $\pm$ 0.1         |
| <b>12e/12e*</b> | 2.5                         | 97.8 $\pm$ 0.3   | 0.5 $\pm$ 0.1                | 1.0 $\pm$ 0.2               | 0.7 $\pm$ 0.1         |
|                 | 10                          | 97.3 $\pm$ 1.1   | 0.8 $\pm$ 0.4                | 1.2 $\pm$ 0.6               | 0.7 $\pm$ 0.1         |
| <b>13d</b>      | 2.5                         | 96.0 $\pm$ 0.6   | 1.1 $\pm$ 0.2                | 1.8 $\pm$ 0.4               | 1.0 $\pm$ 0.4         |
|                 | 10                          | 95.5 $\pm$ 1.3   | 1.3 $\pm$ 0.3                | 2.3 $\pm$ 1.0               | 0.9 $\pm$ 0.3         |
| <b>14c</b>      | 2.5                         | 95.2 $\pm$ 2.0   | 1.3 $\pm$ 0.6                | 2.3 $\pm$ 1.2               | 1.2 $\pm$ 0.3         |
|                 | 10                          | 95.7 $\pm$ 0.8   | 1.6 $\pm$ 0.3                | 1.9 $\pm$ 0.6               | 0.9 $\pm$ 0.1         |
| <b>14d</b>      | 2.5                         | 95.0 $\pm$ 0.9   | 1.3 $\pm$ 0.3                | 2.5 $\pm$ 0.6               | 1.1 $\pm$ 0.5         |
|                 | 10                          | 96.2 $\pm$ 0.6   | 1.3 $\pm$ 0.2                | 1.6 $\pm$ 0.4               | 1.0 $\pm$ 0.5         |
| <b>14e</b>      | 2.5                         | 95.0 $\pm$ 1.4   | 1.5 $\pm$ 0.5                | 2.5 $\pm$ 1.0               | 1.0 $\pm$ 0.5         |
|                 | 10                          | 92.9 $\pm$ 5.0   | 2.0 $\pm$ 1.4                | 3.7 $\pm$ 3.3               | 1.3 $\pm$ 0.5         |
| <b>15d</b>      | 2.5                         | 97.3 $\pm$ 0.2   | 0.5 $\pm$ 0.1                | 0.9 $\pm$ 0.2               | 0.9 $\pm$ 0.2         |
|                 | 10                          | 98.1 $\pm$ 0.2   | 0.4 $\pm$ 0.2                | 0.9 $\pm$ 0.1               | 0.6 $\pm$ 0.1         |
| <b>16d</b>      | 2.5                         | 97.1 $\pm$ 0.5   | 0.5 $\pm$ 0.1                | 1.2 $\pm$ 0.4               | 1.2 $\pm$ 0.1         |
|                 | 10                          | 92.4 $\pm$ 1.0   | 1.1 $\pm$ 0.4                | 3.4 $\pm$ 1.5               | 3.2 $\pm$ 0.1         |

## 6. References

1. Bruker SAINT v8.38B Copyright © 2005-2019 Bruker AXS.
2. Sheldrick, G. M. (1996). SADABS. University of Göttingen, Germany.
3. Dolomanov, O. V.; Bourhis, L.J.; Gildea, R.J.; Howard, J.A.K.; Puschmann, H. OLEX2: A Complete Structure Solution, Refinement and Analysis Program. *J Appl Crystallogr* **2009**, *42*, 339–341, doi:10.1107/S0021889808042726.
4. Hübschle, C.B.; Sheldrick, G.M.; Dittrich, B. ShelXle: A Qt Graphical User Interface for SHELXL. *J Appl Crystallogr* **2011**, *44*, 1281–1284, doi:10.1107/S0021889811043202.
5. Sheldrick, G. M. (2015). SHELXS v 2016/4 University of Göttingen, Germany.
6. Sheldrick, G. M. (2015). SHELXL v 2016/4 University of Göttingen, Germany.
7. Spek, A.L. Structure Validation in Chemical Crystallography. *Acta Crystallogr D Biol Crystallogr* **2009**, *65*, 148–155, doi:10.1107/S090744490804362X.
